# Supplementary material
Source: publisher figshare collection journal article supplement (https://acs.figshare.com/ndownloader/files/8099162)
Supplement: Supplementary file 1 [file 8099162]

 
data_spider-16073 

_vrf_PLAT430_spider-16073
;
PROBLEM:
RESPONSE: This is a close interaction that arises from the carbonyl and nitrophenyl
group.  The model and packing is supported by the observed electron density.
;
  
_audit_creation_method            'SHELXL-2014/7' 
_shelx_SHELXL_version_number      '2014/7' 
_chemical_name_systematic         ? 
_chemical_name_common             ? 
_chemical_melting_point           ? 
_chemical_formula_moiety          'C22 H25 N3 O6' 
_chemical_formula_sum 
 'C22 H25 N3 O6' 
_chemical_formula_weight          427.45 
  
loop_ 
 _atom_type_symbol 
 _atom_type_description 
 _atom_type_scat_dispersion_real 
 _atom_type_scat_dispersion_imag 
 _atom_type_scat_source 
 'C'  'C'   0.0033   0.0016 
 'International Tables Vol C Tables 4.2.6.8 and 6.1.1.4' 
 'H'  'H'   0.0000   0.0000 
 'International Tables Vol C Tables 4.2.6.8 and 6.1.1.4' 
 'N'  'N'   0.0061   0.0033 
 'International Tables Vol C Tables 4.2.6.8 and 6.1.1.4' 
 'O'  'O'   0.0106   0.0060 
 'International Tables Vol C Tables 4.2.6.8 and 6.1.1.4' 
  
_space_group_crystal_system       monoclinic 
_space_group_IT_number            14 
_space_group_name_H-M_alt         'P 21/c' 
_space_group_name_Hall            '-P 2ybc' 
  
_shelx_space_group_comment 
; 
The symmetry employed for this shelxl refinement is uniquely defined 
by the following loop, which should always be used as a source of 
symmetry information in preference to the above space-group names. 
They are only intended as comments. 
; 
  
loop_ 
 _space_group_symop_operation_xyz 
 'x, y, z' 
 '-x, y+1/2, -z+1/2' 
 '-x, -y, -z' 
 'x, -y-1/2, z-1/2' 
  
_cell_length_a                    17.4243(12) 
_cell_length_b                    9.9387(7) 
_cell_length_c                    11.9804(8) 
_cell_angle_alpha                 90 
_cell_angle_beta                  90.039(2) 
_cell_angle_gamma                 90 
_cell_volume                      2074.7(2) 
_cell_formula_units_Z             4 
_cell_measurement_temperature     93(2) 
_cell_measurement_reflns_used     775 
_cell_measurement_theta_min       1.2 
_cell_measurement_theta_max       27.5 
  
_exptl_crystal_description        Plate
_exptl_crystal_colour             Colorless 
_exptl_crystal_density_meas       ? 
_exptl_crystal_density_method     'not measured' 
_exptl_crystal_density_diffrn     1.368 
_exptl_crystal_F_000              904 
_exptl_transmission_factor_min    ? 
_exptl_transmission_factor_max    ? 
_exptl_crystal_size_max           0.240 
_exptl_crystal_size_mid           0.210 
_exptl_crystal_size_min           0.050 
_exptl_absorpt_coefficient_mu     0.101 
_shelx_estimated_absorpt_T_min    0.976 
_shelx_estimated_absorpt_T_max    0.995 
_exptl_absorpt_correction_type    multi-scan 
_exptl_absorpt_correction_T_min   0.898 
_exptl_absorpt_correction_T_max   1.000 
_exptl_absorpt_process_details    'Jacobson, R. (1998) Private Communication' 
_exptl_absorpt_special_details    ? 
_diffrn_ambient_temperature       93(2) 
_diffrn_radiation_wavelength      0.71073 
_diffrn_radiation_type            MoK\a 
_diffrn_source                    'Sealed Tube' 
_diffrn_measurement_device_type   'Rigaku R-AXIS RAPID imaging plate' 
_diffrn_measurement_method        \w 
_diffrn_detector_area_resol_mean  10 
_diffrn_reflns_number             65169 
_diffrn_reflns_av_unetI/netI      0.0223 
_diffrn_reflns_av_R_equivalents   0.0455 
_diffrn_reflns_limit_h_min        -22 
_diffrn_reflns_limit_h_max        22 
_diffrn_reflns_limit_k_min        -12 
_diffrn_reflns_limit_k_max        12 
_diffrn_reflns_limit_l_min        -15 
_diffrn_reflns_limit_l_max        15 
_diffrn_reflns_theta_min          2.338 
_diffrn_reflns_theta_max          27.490 
_diffrn_reflns_theta_full         25.242 
_diffrn_measured_fraction_theta_max   0.999 
_diffrn_measured_fraction_theta_full  0.999 
_diffrn_reflns_Laue_measured_fraction_max    0.999 
_diffrn_reflns_Laue_measured_fraction_full   0.999 
_diffrn_reflns_point_group_measured_fraction_max   0.999 
_diffrn_reflns_point_group_measured_fraction_full  0.999 
_reflns_number_total              4761 
_reflns_number_gt                 3634 
_reflns_threshold_expression      'I > 2\s(I)' 
_reflns_Friedel_coverage          0.000 
_reflns_Friedel_fraction_max      . 
_reflns_Friedel_fraction_full     . 
  
_reflns_special_details 
; 
 Reflections were merged by SHELXL according to the crystal 
 class for the calculation of statistics and refinement. 
  
 _reflns_Friedel_fraction is defined as the number of unique 
 Friedel pairs measured divided by the number that would be 
 possible theoretically, ignoring centric projections and 
 systematic absences. 
; 
  
_computing_data_collection        'CrystalClear-SM Expert 2.0 r15 (Rigaku, 2011)' 
_computing_cell_refinement        'CrystalClear-SM Expert 2.0 r15 (Rigaku, 2011)' 
_computing_data_reduction         'CrystalClear-SM Expert 2.0 r15 (Rigaku, 2011)' 
_computing_structure_solution     'SHELXT-2014/5 (Sheldrick, 2014)' 
_computing_structure_refinement 'SHELXL-2014/7 (Sheldrick, 2014)' 
_computing_molecular_graphics 
; 
Dolomanov, O.V.; Bourhis, L.J.; Gildea, R.J.; Howard, J.A.K.; Puschmann, H., 
OLEX2: A complete structure solution, refinement and analysis program
(2009). J. Appl. Cryst., 42, 339-341.
; 
_computing_publication_material   'CIFTAB-2013/2 (Sheldrick, 2014)' 
_refine_special_details 
; 
 Refinement of F^2^ against ALL reflections.  The weighted R-factor wR and 
 goodness of fit S are based on F^2^, conventional R-factors R are based 
 on F, with F set to zero for negative F^2^. The threshold expression of 
 F^2^ > 2sigma(F^2^) is used only for calculating R-factors(gt) etc. and is 
 not relevant to the choice of reflections for refinement.  R-factors based 
 on F^2^ are statistically about twice as large as those based on F, and R- 
 factors based on ALL data will be even larger. 

The hydrogen atoms were first found in the difference map, then generated 
geometrically and refined as riding atoms with C-H distances = 0.95- 0.99 
angstroms and Uiso(H) = 1.2 times Ueq(C) for CH and CH2 groups and Uiso(H) 
= 1.5 times Ueq(C) for CH3 groups. The (1 0 0) reflection was omitted 
as it was obscured by the beamstop.
; 
_refine_ls_structure_factor_coef  Fsqd 
_refine_ls_matrix_type            full 
_refine_ls_weighting_scheme       calc 
_refine_ls_weighting_details 
'w=1/[\s^2^(Fo^2^)+(0.0531P)^2^] where P=(Fo^2^+2Fc^2^)/3' 
_atom_sites_solution_primary      SHELXT 
_atom_sites_solution_secondary    difmap 
_atom_sites_solution_hydrogens    geom 
_refine_ls_hydrogen_treatment     constr 
_refine_ls_extinction_method      none 
_refine_ls_extinction_coef        . 
_refine_ls_number_reflns          4761 
_refine_ls_number_parameters      283 
_refine_ls_number_restraints      0 
_refine_ls_R_factor_all           0.0405 
_refine_ls_R_factor_gt            0.0303 
_refine_ls_wR_factor_ref          0.0843 
_refine_ls_wR_factor_gt           0.0818 
_refine_ls_goodness_of_fit_ref    1.033 
_refine_ls_restrained_S_all       1.033 
_refine_ls_shift/su_max           0.001 
_refine_ls_shift/su_mean          0.000 
  
loop_ 
 _atom_site_label 
 _atom_site_type_symbol 
 _atom_site_fract_x 
 _atom_site_fract_y 
 _atom_site_fract_z 
 _atom_site_U_iso_or_equiv 
 _atom_site_adp_type 
 _atom_site_occupancy 
 _atom_site_site_symmetry_order 
 _atom_site_calc_flag 
 _atom_site_refinement_flags_posn 
 _atom_site_refinement_flags_adp 
 _atom_site_refinement_flags_occupancy 
 _atom_site_disorder_assembly 
 _atom_site_disorder_group 
O1 O 0.68216(4) 0.31401(7) 0.59546(6) 0.01973(16) Uani 1 1 d . . . . . 
O2 O 0.61401(4) 0.14760(8) 0.68022(6) 0.02268(17) Uani 1 1 d . . . . . 
O3 O 0.56827(4) 0.59189(7) 0.31888(6) 0.02299(17) Uani 1 1 d . . . . . 
O4 O 0.46183(4) 0.53544(8) 0.23658(6) 0.02531(17) Uani 1 1 d . . . . . 
O5 O 0.32036(4) 0.14943(8) 0.37306(7) 0.02618(18) Uani 1 1 d . . . . . 
O6 O 0.36128(4) 0.04340(8) 0.52033(7) 0.02878(19) Uani 1 1 d . . . . . 
N1 N 0.99265(6) 0.94796(11) 0.31775(10) 0.0387(3) Uani 1 1 d . . . . . 
N2 N 0.51353(5) 0.51618(9) 0.30488(7) 0.01902(18) Uani 1 1 d . . . . . 
N3 N 0.36799(5) 0.12862(9) 0.44650(7) 0.02066(19) Uani 1 1 d . . . . . 
C1 C 0.80608(6) 0.41081(10) 0.61957(9) 0.0205(2) Uani 1 1 d . . . . . 
H1 H 0.8555 0.4035 0.6615 0.025 Uiso 1 1 calc R U . . . 
C2 C 0.82480(6) 0.38743(11) 0.49583(9) 0.0237(2) Uani 1 1 d . . . . . 
H2A H 0.8511 0.2996 0.4881 0.028 Uiso 1 1 calc R U . . . 
H2B H 0.7762 0.3824 0.4533 0.028 Uiso 1 1 calc R U . . . 
C3 C 0.87545(6) 0.49710(11) 0.44462(9) 0.0238(2) Uani 1 1 d . . . . . 
H3A H 0.8818 0.4786 0.3640 0.029 Uiso 1 1 calc R U . . . 
H3B H 0.9269 0.4932 0.4796 0.029 Uiso 1 1 calc R U . . . 
C4 C 0.84268(6) 0.63973(10) 0.45921(8) 0.0195(2) Uani 1 1 d . . . . . 
C5 C 0.82911(6) 0.66051(10) 0.58510(9) 0.0216(2) Uani 1 1 d . . . . . 
H5A H 0.8792 0.6584 0.6241 0.026 Uiso 1 1 calc R U . . . 
H5B H 0.8064 0.7507 0.5970 0.026 Uiso 1 1 calc R U . . . 
C6 C 0.77632(6) 0.55464(10) 0.63690(9) 0.0219(2) Uani 1 1 d . . . . . 
H6A H 0.7246 0.5626 0.6033 0.026 Uiso 1 1 calc R U . . . 
H6B H 0.7715 0.5723 0.7179 0.026 Uiso 1 1 calc R U . . . 
C7 C 0.75149(6) 0.30243(11) 0.66785(9) 0.0217(2) Uani 1 1 d . . . . . 
C8 C 0.72896(7) 0.33331(12) 0.78835(9) 0.0289(3) Uani 1 1 d . . . . . 
H8A H 0.6963 0.4135 0.7901 0.043 Uiso 1 1 calc R U . . . 
H8B H 0.7753 0.3495 0.8327 0.043 Uiso 1 1 calc R U . . . 
H8C H 0.7008 0.2567 0.8196 0.043 Uiso 1 1 calc R U . . . 
C9 C 0.78441(6) 0.16076(11) 0.65495(11) 0.0290(3) Uani 1 1 d . . . . . 
H9A H 0.7521 0.0966 0.6956 0.044 Uiso 1 1 calc R U . . . 
H9B H 0.8366 0.1584 0.6853 0.044 Uiso 1 1 calc R U . . . 
H9C H 0.7856 0.1365 0.5757 0.044 Uiso 1 1 calc R U . . . 
C10 C 0.62175(6) 0.23324(10) 0.60947(8) 0.0184(2) Uani 1 1 d . . . . . 
C11 C 0.56100(5) 0.26324(10) 0.52415(8) 0.0171(2) Uani 1 1 d . . . . . 
C12 C 0.49493(6) 0.18367(10) 0.52335(8) 0.0176(2) Uani 1 1 d . . . . . 
H12 H 0.4894 0.1111 0.5743 0.021 Uiso 1 1 calc R U . . . 
C13 C 0.43777(5) 0.21254(10) 0.44696(8) 0.0180(2) Uani 1 1 d . . . . . 
C14 C 0.44241(6) 0.31834(10) 0.37169(8) 0.0181(2) Uani 1 1 d . . . . . 
H14 H 0.4027 0.3362 0.3194 0.022 Uiso 1 1 calc R U . . . 
C15 C 0.50802(6) 0.39633(10) 0.37706(8) 0.0171(2) Uani 1 1 d . . . . . 
C16 C 0.56784(6) 0.37051(10) 0.45016(8) 0.0171(2) Uani 1 1 d . . . . . 
H16 H 0.6127 0.4249 0.4498 0.021 Uiso 1 1 calc R U . . . 
C17 C 0.89789(6) 0.74587(11) 0.41361(9) 0.0226(2) Uani 1 1 d . . . . . 
C18 C 0.89101(8) 0.88151(12) 0.44275(12) 0.0396(3) Uani 1 1 d . . . . . 
H18 H 0.8537 0.9088 0.4958 0.048 Uiso 1 1 calc R U . . . 
C19 C 0.93889(9) 0.97596(14) 0.39393(13) 0.0474(4) Uani 1 1 d . . . . . 
H19 H 0.9331 1.0671 0.4162 0.057 Uiso 1 1 calc R U . . . 
C20 C 0.99836(7) 0.81887(13) 0.28975(10) 0.0319(3) Uani 1 1 d . . . . . 
H20 H 1.0355 0.7951 0.2352 0.038 Uiso 1 1 calc R U . . . 
C21 C 0.95393(6) 0.71633(12) 0.33460(9) 0.0265(2) Uani 1 1 d . . . . . 
H21 H 0.9618 0.6260 0.3113 0.032 Uiso 1 1 calc R U . . . 
C22 C 0.76752(6) 0.65623(12) 0.39213(9) 0.0264(2) Uani 1 1 d . . . . . 
H22A H 0.7476 0.7476 0.4025 0.040 Uiso 1 1 calc R U . . . 
H22B H 0.7296 0.5909 0.4186 0.040 Uiso 1 1 calc R U . . . 
H22C H 0.7778 0.6407 0.3127 0.040 Uiso 1 1 calc R U . . . 
  
loop_ 
 _atom_site_aniso_label 
 _atom_site_aniso_U_11 
 _atom_site_aniso_U_22 
 _atom_site_aniso_U_33 
 _atom_site_aniso_U_23 
 _atom_site_aniso_U_13 
 _atom_site_aniso_U_12 
O1 0.0161(3) 0.0236(4) 0.0195(4) 0.0042(3) -0.0038(3) -0.0022(3) 
O2 0.0219(4) 0.0253(4) 0.0208(4) 0.0058(3) -0.0021(3) -0.0019(3) 
O3 0.0252(4) 0.0205(4) 0.0233(4) 0.0008(3) 0.0012(3) -0.0012(3) 
O4 0.0265(4) 0.0282(4) 0.0211(4) 0.0040(3) -0.0047(3) 0.0054(3) 
O5 0.0197(4) 0.0284(4) 0.0304(4) -0.0023(3) -0.0077(3) 0.0006(3) 
O6 0.0275(4) 0.0298(4) 0.0290(4) 0.0056(3) -0.0016(3) -0.0079(3) 
N1 0.0369(6) 0.0373(6) 0.0418(6) 0.0096(5) -0.0018(5) -0.0125(5) 
N2 0.0213(4) 0.0200(4) 0.0157(4) -0.0010(3) 0.0015(3) 0.0039(3) 
N3 0.0185(4) 0.0206(4) 0.0229(4) -0.0036(4) -0.0007(3) 0.0007(3) 
C1 0.0174(5) 0.0214(5) 0.0229(5) 0.0006(4) -0.0040(4) -0.0006(4) 
C2 0.0232(5) 0.0191(5) 0.0287(6) -0.0042(4) 0.0041(4) -0.0011(4) 
C3 0.0220(5) 0.0212(5) 0.0282(6) -0.0044(4) 0.0058(4) -0.0016(4) 
C4 0.0172(5) 0.0203(5) 0.0211(5) -0.0018(4) -0.0003(4) -0.0006(4) 
C5 0.0236(5) 0.0195(5) 0.0217(5) -0.0033(4) -0.0016(4) -0.0003(4) 
C6 0.0241(5) 0.0225(5) 0.0190(5) -0.0025(4) 0.0015(4) 0.0006(4) 
C7 0.0177(5) 0.0248(5) 0.0226(5) 0.0045(4) -0.0072(4) -0.0013(4) 
C8 0.0299(6) 0.0367(6) 0.0201(5) 0.0064(5) -0.0061(4) -0.0055(5) 
C9 0.0215(5) 0.0242(6) 0.0414(7) 0.0083(5) -0.0061(5) 0.0001(4) 
C10 0.0175(5) 0.0198(5) 0.0179(5) -0.0005(4) 0.0002(4) 0.0008(4) 
C11 0.0171(5) 0.0195(5) 0.0147(4) -0.0022(4) 0.0007(4) 0.0024(4) 
C12 0.0200(5) 0.0172(5) 0.0157(5) -0.0010(4) 0.0017(4) 0.0017(4) 
C13 0.0162(5) 0.0190(5) 0.0188(5) -0.0053(4) 0.0013(4) 0.0007(4) 
C14 0.0176(5) 0.0199(5) 0.0166(5) -0.0042(4) -0.0015(4) 0.0048(4) 
C15 0.0201(5) 0.0170(5) 0.0143(5) -0.0013(4) 0.0020(4) 0.0038(4) 
C16 0.0164(5) 0.0188(5) 0.0161(5) -0.0026(4) 0.0017(4) 0.0014(4) 
C17 0.0198(5) 0.0234(5) 0.0245(5) 0.0017(4) -0.0042(4) -0.0016(4) 
C18 0.0452(7) 0.0248(6) 0.0489(8) -0.0027(6) 0.0146(6) -0.0044(5) 
C19 0.0587(9) 0.0250(6) 0.0585(9) 0.0016(6) 0.0077(7) -0.0101(6) 
C20 0.0234(6) 0.0399(7) 0.0325(6) 0.0078(5) -0.0008(5) -0.0058(5) 
C21 0.0223(5) 0.0285(6) 0.0288(6) 0.0027(5) -0.0009(4) -0.0024(4) 
C22 0.0224(5) 0.0320(6) 0.0248(6) 0.0033(5) -0.0043(4) -0.0036(4) 
  
_geom_special_details 
; 
 All esds (except the esd in the dihedral angle between two l.s. planes) 
 are estimated using the full covariance matrix.  The cell esds are taken 
 into account individually in the estimation of esds in distances, angles 
 and torsion angles; correlations between esds in cell parameters are only 
 used when they are defined by crystal symmetry.  An approximate (isotropic) 
 treatment of cell esds is used for estimating esds involving l.s. planes. 
; 
  
loop_ 
 _geom_bond_atom_site_label_1 
 _geom_bond_atom_site_label_2 
 _geom_bond_distance 
 _geom_bond_site_symmetry_2 
 _geom_bond_publ_flag 
O1 C10 1.3345(12) . ? 
O1 C7 1.4910(11) . ? 
O2 C10 1.2089(12) . ? 
O3 N2 1.2264(11) . ? 
O4 N2 1.2315(11) . ? 
O5 N3 1.2267(11) . ? 
O6 N3 1.2302(12) . ? 
N1 C20 1.3298(17) . ? 
N1 C19 1.3375(19) . ? 
N2 C15 1.4752(13) . ? 
N3 C13 1.4745(13) . ? 
C1 C6 1.5348(14) . ? 
C1 C2 1.5357(15) . ? 
C1 C7 1.5494(15) . ? 
C1 H1 1.0000 . ? 
C2 C3 1.5311(15) . ? 
C2 H2A 0.9900 . ? 
C2 H2B 0.9900 . ? 
C3 C4 1.5383(14) . ? 
C3 H3A 0.9900 . ? 
C3 H3B 0.9900 . ? 
C4 C17 1.5289(15) . ? 
C4 C5 1.5407(14) . ? 
C4 C22 1.5447(14) . ? 
C5 C6 1.5294(15) . ? 
C5 H5A 0.9900 . ? 
C5 H5B 0.9900 . ? 
C6 H6A 0.9900 . ? 
C6 H6B 0.9900 . ? 
C7 C8 1.5275(15) . ? 
C7 C9 1.5283(15) . ? 
C8 H8A 0.9800 . ? 
C8 H8B 0.9800 . ? 
C8 H8C 0.9800 . ? 
C9 H9A 0.9800 . ? 
C9 H9B 0.9800 . ? 
C9 H9C 0.9800 . ? 
C10 C11 1.5010(13) . ? 
C11 C16 1.3917(14) . ? 
C11 C12 1.3966(14) . ? 
C12 C13 1.3823(14) . ? 
C12 H12 0.9500 . ? 
C13 C14 1.3876(14) . ? 
C14 C15 1.3826(14) . ? 
C14 H14 0.9500 . ? 
C15 C16 1.3850(13) . ? 
C16 H16 0.9500 . ? 
C17 C21 1.3917(15) . ? 
C17 C18 1.3977(17) . ? 
C18 C19 1.3856(19) . ? 
C18 H18 0.9500 . ? 
C19 H19 0.9500 . ? 
C20 C21 1.3883(16) . ? 
C20 H20 0.9500 . ? 
C21 H21 0.9500 . ? 
C22 H22A 0.9800 . ? 
C22 H22B 0.9800 . ? 
C22 H22C 0.9800 . ? 
  
loop_ 
 _geom_angle_atom_site_label_1 
 _geom_angle_atom_site_label_2 
 _geom_angle_atom_site_label_3 
 _geom_angle 
 _geom_angle_site_symmetry_1 
 _geom_angle_site_symmetry_3 
 _geom_angle_publ_flag 
C10 O1 C7 121.28(8) . . ? 
C20 N1 C19 115.18(11) . . ? 
O3 N2 O4 124.34(9) . . ? 
O3 N2 C15 117.79(8) . . ? 
O4 N2 C15 117.85(8) . . ? 
O5 N3 O6 124.55(9) . . ? 
O5 N3 C13 117.70(9) . . ? 
O6 N3 C13 117.75(8) . . ? 
C6 C1 C2 110.10(9) . . ? 
C6 C1 C7 112.92(8) . . ? 
C2 C1 C7 112.70(8) . . ? 
C6 C1 H1 106.9 . . ? 
C2 C1 H1 106.9 . . ? 
C7 C1 H1 106.9 . . ? 
C3 C2 C1 113.70(9) . . ? 
C3 C2 H2A 108.8 . . ? 
C1 C2 H2A 108.8 . . ? 
C3 C2 H2B 108.8 . . ? 
C1 C2 H2B 108.8 . . ? 
H2A C2 H2B 107.7 . . ? 
C2 C3 C4 113.35(8) . . ? 
C2 C3 H3A 108.9 . . ? 
C4 C3 H3A 108.9 . . ? 
C2 C3 H3B 108.9 . . ? 
C4 C3 H3B 108.9 . . ? 
H3A C3 H3B 107.7 . . ? 
C17 C4 C3 111.19(8) . . ? 
C17 C4 C5 110.75(8) . . ? 
C3 C4 C5 106.98(8) . . ? 
C17 C4 C22 105.92(8) . . ? 
C3 C4 C22 110.69(8) . . ? 
C5 C4 C22 111.38(8) . . ? 
C6 C5 C4 113.44(8) . . ? 
C6 C5 H5A 108.9 . . ? 
C4 C5 H5A 108.9 . . ? 
C6 C5 H5B 108.9 . . ? 
C4 C5 H5B 108.9 . . ? 
H5A C5 H5B 107.7 . . ? 
C5 C6 C1 112.49(9) . . ? 
C5 C6 H6A 109.1 . . ? 
C1 C6 H6A 109.1 . . ? 
C5 C6 H6B 109.1 . . ? 
C1 C6 H6B 109.1 . . ? 
H6A C6 H6B 107.8 . . ? 
O1 C7 C8 109.00(8) . . ? 
O1 C7 C9 108.44(8) . . ? 
C8 C7 C9 112.18(9) . . ? 
O1 C7 C1 103.09(8) . . ? 
C8 C7 C1 111.80(9) . . ? 
C9 C7 C1 111.85(9) . . ? 
C7 C8 H8A 109.5 . . ? 
C7 C8 H8B 109.5 . . ? 
H8A C8 H8B 109.5 . . ? 
C7 C8 H8C 109.5 . . ? 
H8A C8 H8C 109.5 . . ? 
H8B C8 H8C 109.5 . . ? 
C7 C9 H9A 109.5 . . ? 
C7 C9 H9B 109.5 . . ? 
H9A C9 H9B 109.5 . . ? 
C7 C9 H9C 109.5 . . ? 
H9A C9 H9C 109.5 . . ? 
H9B C9 H9C 109.5 . . ? 
O2 C10 O1 126.88(9) . . ? 
O2 C10 C11 122.58(9) . . ? 
O1 C10 C11 110.54(8) . . ? 
C16 C11 C12 120.03(9) . . ? 
C16 C11 C10 121.68(9) . . ? 
C12 C11 C10 118.23(9) . . ? 
C13 C12 C11 118.72(9) . . ? 
C13 C12 H12 120.6 . . ? 
C11 C12 H12 120.6 . . ? 
C12 C13 C14 123.05(9) . . ? 
C12 C13 N3 118.61(9) . . ? 
C14 C13 N3 118.33(9) . . ? 
C15 C14 C13 116.30(9) . . ? 
C15 C14 H14 121.8 . . ? 
C13 C14 H14 121.8 . . ? 
C14 C15 C16 123.19(9) . . ? 
C14 C15 N2 118.66(9) . . ? 
C16 C15 N2 118.10(9) . . ? 
C15 C16 C11 118.68(9) . . ? 
C15 C16 H16 120.7 . . ? 
C11 C16 H16 120.7 . . ? 
C21 C17 C18 115.70(10) . . ? 
C21 C17 C4 122.64(10) . . ? 
C18 C17 C4 121.47(10) . . ? 
C19 C18 C17 119.75(13) . . ? 
C19 C18 H18 120.1 . . ? 
C17 C18 H18 120.1 . . ? 
N1 C19 C18 124.70(13) . . ? 
N1 C19 H19 117.7 . . ? 
C18 C19 H19 117.7 . . ? 
N1 C20 C21 124.66(12) . . ? 
N1 C20 H20 117.7 . . ? 
C21 C20 H20 117.7 . . ? 
C20 C21 C17 120.01(11) . . ? 
C20 C21 H21 120.0 . . ? 
C17 C21 H21 120.0 . . ? 
C4 C22 H22A 109.5 . . ? 
C4 C22 H22B 109.5 . . ? 
H22A C22 H22B 109.5 . . ? 
C4 C22 H22C 109.5 . . ? 
H22A C22 H22C 109.5 . . ? 
H22B C22 H22C 109.5 . . ? 
  
loop_ 
 _geom_torsion_atom_site_label_1 
 _geom_torsion_atom_site_label_2 
 _geom_torsion_atom_site_label_3 
 _geom_torsion_atom_site_label_4 
 _geom_torsion 
 _geom_torsion_site_symmetry_1 
 _geom_torsion_site_symmetry_2 
 _geom_torsion_site_symmetry_3 
 _geom_torsion_site_symmetry_4 
 _geom_torsion_publ_flag 
C6 C1 C2 C3 50.06(12) . . . . ? 
C7 C1 C2 C3 177.12(8) . . . . ? 
C1 C2 C3 C4 -54.55(12) . . . . ? 
C2 C3 C4 C17 176.21(9) . . . . ? 
C2 C3 C4 C5 55.17(11) . . . . ? 
C2 C3 C4 C22 -66.34(12) . . . . ? 
C17 C4 C5 C6 -178.11(8) . . . . ? 
C3 C4 C5 C6 -56.79(11) . . . . ? 
C22 C4 C5 C6 64.29(11) . . . . ? 
C4 C5 C6 C1 57.01(12) . . . . ? 
C2 C1 C6 C5 -50.91(11) . . . . ? 
C7 C1 C6 C5 -177.84(8) . . . . ? 
C10 O1 C7 C8 -62.72(12) . . . . ? 
C10 O1 C7 C9 59.66(12) . . . . ? 
C10 O1 C7 C1 178.37(8) . . . . ? 
C6 C1 C7 O1 66.69(10) . . . . ? 
C2 C1 C7 O1 -58.85(10) . . . . ? 
C6 C1 C7 C8 -50.26(11) . . . . ? 
C2 C1 C7 C8 -175.80(9) . . . . ? 
C6 C1 C7 C9 -177.01(9) . . . . ? 
C2 C1 C7 C9 57.45(11) . . . . ? 
C7 O1 C10 O2 2.31(15) . . . . ? 
C7 O1 C10 C11 -178.43(8) . . . . ? 
O2 C10 C11 C16 173.79(10) . . . . ? 
O1 C10 C11 C16 -5.50(13) . . . . ? 
O2 C10 C11 C12 -3.57(15) . . . . ? 
O1 C10 C11 C12 177.13(8) . . . . ? 
C16 C11 C12 C13 0.99(14) . . . . ? 
C10 C11 C12 C13 178.40(8) . . . . ? 
C11 C12 C13 C14 -0.90(15) . . . . ? 
C11 C12 C13 N3 -179.83(8) . . . . ? 
O5 N3 C13 C12 -174.86(9) . . . . ? 
O6 N3 C13 C12 5.75(13) . . . . ? 
O5 N3 C13 C14 6.15(13) . . . . ? 
O6 N3 C13 C14 -173.24(9) . . . . ? 
C12 C13 C14 C15 -0.52(14) . . . . ? 
N3 C13 C14 C15 178.42(8) . . . . ? 
C13 C14 C15 C16 1.93(14) . . . . ? 
C13 C14 C15 N2 -175.48(8) . . . . ? 
O3 N2 C15 C14 172.54(8) . . . . ? 
O4 N2 C15 C14 -5.60(13) . . . . ? 
O3 N2 C15 C16 -5.01(13) . . . . ? 
O4 N2 C15 C16 176.85(8) . . . . ? 
C14 C15 C16 C11 -1.85(14) . . . . ? 
N2 C15 C16 C11 175.57(8) . . . . ? 
C12 C11 C16 C15 0.32(14) . . . . ? 
C10 C11 C16 C15 -177.00(9) . . . . ? 
C3 C4 C17 C21 22.12(14) . . . . ? 
C5 C4 C17 C21 140.92(10) . . . . ? 
C22 C4 C17 C21 -98.19(11) . . . . ? 
C3 C4 C17 C18 -162.98(11) . . . . ? 
C5 C4 C17 C18 -44.18(14) . . . . ? 
C22 C4 C17 C18 76.71(13) . . . . ? 
C21 C17 C18 C19 -0.45(19) . . . . ? 
C4 C17 C18 C19 -175.69(12) . . . . ? 
C20 N1 C19 C18 -0.1(2) . . . . ? 
C17 C18 C19 N1 0.7(2) . . . . ? 
C19 N1 C20 C21 -0.75(19) . . . . ? 
N1 C20 C21 C17 0.97(18) . . . . ? 
C18 C17 C21 C20 -0.30(16) . . . . ? 
C4 C17 C21 C20 174.87(10) . . . . ? 
  
_refine_diff_density_max    0.279 
_refine_diff_density_min   -0.198 
_refine_diff_density_rms    0.038 
  
_shelx_res_file 
; 
  
    spider-16073.res created by SHELXL-2014/7 
  
TITL spider-16073 
CELL 0.71073 17.4243 9.9387 11.9804 90 90.039 90 
ZERR 4 0.0012 0.0007 0.0008 0 0.002 0 
LATT 1 
SYMM -X,0.5+Y,0.5-Z 
SFAC C H N O 
UNIT 88 100 12 24 
  
L.S. 10 
PLAN  20 
SIZE 0.24 0.21 0.05 
TEMP -180 
BOND $H 
MORE -1 
CONF 
fmap 2 
acta 
OMIT 1 0 0 
  
WGHT    0.053100 
FVAR       0.46653 
O1    4    0.682165    0.314010    0.595458    11.00000    0.01609    0.02363 = 
         0.01946    0.00422   -0.00381   -0.00219 
O2    4    0.614013    0.147601    0.680225    11.00000    0.02187    0.02533 = 
         0.02082    0.00581   -0.00215   -0.00193 
O3    4    0.568272    0.591891    0.318885    11.00000    0.02515    0.02050 = 
         0.02331    0.00077    0.00119   -0.00123 
O4    4    0.461831    0.535438    0.236579    11.00000    0.02655    0.02825 = 
         0.02112    0.00397   -0.00473    0.00539 
O5    4    0.320361    0.149433    0.373058    11.00000    0.01970    0.02837 = 
         0.03045   -0.00233   -0.00770    0.00065 
O6    4    0.361276    0.043397    0.520328    11.00000    0.02749    0.02981 = 
         0.02904    0.00556   -0.00162   -0.00792 
N1    3    0.992645    0.947960    0.317747    11.00000    0.03693    0.03733 = 
         0.04183    0.00959   -0.00179   -0.01252 
N2    3    0.513528    0.516183    0.304876    11.00000    0.02127    0.02004 = 
         0.01575   -0.00103    0.00152    0.00386 
N3    3    0.367992    0.128616    0.446501    11.00000    0.01852    0.02058 = 
         0.02288   -0.00360   -0.00067    0.00067 
C1    1    0.806082    0.410815    0.619568    11.00000    0.01737    0.02139 = 
         0.02288    0.00061   -0.00403   -0.00059 
AFIX  13 
H1    2    0.855536    0.403496    0.661533    11.00000   -1.20000 
AFIX   0 
C2    1    0.824798    0.387426    0.495834    11.00000    0.02320    0.01910 = 
         0.02870   -0.00421    0.00408   -0.00112 
AFIX  23 
H2A   2    0.851115    0.299644    0.488079    11.00000   -1.20000 
H2B   2    0.776165    0.382430    0.453260    11.00000   -1.20000 
AFIX   0 
C3    1    0.875446    0.497102    0.444617    11.00000    0.02195    0.02122 = 
         0.02816   -0.00444    0.00575   -0.00160 
AFIX  23 
H3A   2    0.881811    0.478601    0.363956    11.00000   -1.20000 
H3B   2    0.926874    0.493190    0.479649    11.00000   -1.20000 
AFIX   0 
C4    1    0.842677    0.639733    0.459212    11.00000    0.01723    0.02031 = 
         0.02110   -0.00176   -0.00033   -0.00057 
C5    1    0.829113    0.660513    0.585100    11.00000    0.02359    0.01947 = 
         0.02174   -0.00335   -0.00160   -0.00033 
AFIX  23 
H5A   2    0.879198    0.658352    0.624125    11.00000   -1.20000 
H5B   2    0.806384    0.750672    0.596973    11.00000   -1.20000 
AFIX   0 
C6    1    0.776324    0.554643    0.636903    11.00000    0.02413    0.02248 = 
         0.01895   -0.00245    0.00147    0.00059 
AFIX  23 
H6A   2    0.724606    0.562638    0.603285    11.00000   -1.20000 
H6B   2    0.771482    0.572346    0.717912    11.00000   -1.20000 
AFIX   0 
C7    1    0.751488    0.302433    0.667849    11.00000    0.01769    0.02476 = 
         0.02258    0.00448   -0.00715   -0.00130 
C8    1    0.728955    0.333314    0.788354    11.00000    0.02993    0.03668 = 
         0.02005    0.00638   -0.00609   -0.00555 
AFIX 137 
H8A   2    0.696271    0.413532    0.790096    11.00000   -1.50000 
H8B   2    0.775315    0.349544    0.832715    11.00000   -1.50000 
H8C   2    0.700824    0.256679    0.819559    11.00000   -1.50000 
AFIX   0 
C9    1    0.784411    0.160763    0.654946    11.00000    0.02148    0.02422 = 
         0.04141    0.00832   -0.00613    0.00011 
AFIX 137 
H9A   2    0.752107    0.096620    0.695563    11.00000   -1.50000 
H9B   2    0.836632    0.158367    0.685310    11.00000   -1.50000 
H9C   2    0.785606    0.136457    0.575690    11.00000   -1.50000 
AFIX   0 
C10   1    0.621754    0.233237    0.609468    11.00000    0.01751    0.01981 = 
         0.01788   -0.00053    0.00017    0.00081 
C11   1    0.560995    0.263242    0.524146    11.00000    0.01708    0.01946 = 
         0.01466   -0.00217    0.00070    0.00241 
C12   1    0.494934    0.183670    0.523353    11.00000    0.01999    0.01717 = 
         0.01568   -0.00099    0.00171    0.00166 
AFIX  43 
H12   2    0.489392    0.111106    0.574329    11.00000   -1.20000 
AFIX   0 
C13   1    0.437771    0.212538    0.446963    11.00000    0.01622    0.01898 = 
         0.01877   -0.00527    0.00126    0.00069 
C14   1    0.442408    0.318336    0.371689    11.00000    0.01764    0.01993 = 
         0.01663   -0.00421   -0.00153    0.00477 
AFIX  43 
H14   2    0.402703    0.336191    0.319365    11.00000   -1.20000 
AFIX   0 
C15   1    0.508016    0.396327    0.377055    11.00000    0.02012    0.01696 = 
         0.01434   -0.00126    0.00204    0.00384 
C16   1    0.567843    0.370513    0.450156    11.00000    0.01638    0.01884 = 
         0.01606   -0.00262    0.00174    0.00136 
AFIX  43 
H16   2    0.612659    0.424947    0.449797    11.00000   -1.20000 
AFIX   0 
C17   1    0.897895    0.745870    0.413615    11.00000    0.01984    0.02342 = 
         0.02454    0.00166   -0.00418   -0.00158 
C18   1    0.891011    0.881509    0.442754    11.00000    0.04520    0.02481 = 
         0.04890   -0.00269    0.01456   -0.00437 
AFIX  43 
H18   2    0.853650    0.908840    0.495832    11.00000   -1.20000 
AFIX   0 
C19   1    0.938888    0.975956    0.393928    11.00000    0.05866    0.02496 = 
         0.05852    0.00158    0.00768   -0.01014 
AFIX  43 
H19   2    0.933117    1.067147    0.416159    11.00000   -1.20000 
AFIX   0 
C20   1    0.998363    0.818874    0.289745    11.00000    0.02336    0.03993 = 
         0.03248    0.00779   -0.00082   -0.00583 
AFIX  43 
H20   2    1.035498    0.795137    0.235164    11.00000   -1.20000 
AFIX   0 
C21   1    0.953927    0.716329    0.334597    11.00000    0.02227    0.02850 = 
         0.02884    0.00266   -0.00090   -0.00242 
AFIX  43 
H21   2    0.961770    0.625987    0.311346    11.00000   -1.20000 
AFIX   0 
C22   1    0.767523    0.656229    0.392135    11.00000    0.02240    0.03197 = 
         0.02477    0.00326   -0.00432   -0.00357 
AFIX 137 
H22A  2    0.747554    0.747556    0.402498    11.00000   -1.50000 
H22B  2    0.729567    0.590854    0.418605    11.00000   -1.50000 
H22C  2    0.777767    0.640743    0.312746    11.00000   -1.50000 
AFIX   0 
HKLF 4 
  
REM  spider-16073 
REM R1 =  0.0303 for    3634 Fo > 4sig(Fo)  and  0.0405 for all    4761 data 
REM    283 parameters refined using      0 restraints 
  
END 
  
WGHT      0.0531      0.0000 
  
REM Highest difference peak  0.279,  deepest hole -0.198,  1-sigma level  0.038 
Q1    1   0.7768  0.3582  0.6440  11.00000  0.05    0.28 
Q2    1   0.5891  0.2474  0.5648  11.00000  0.05    0.27 
Q3    1   0.7908  0.4818  0.6233  11.00000  0.05    0.25 
Q4    1   0.8304  0.6528  0.5181  11.00000  0.05    0.25 
Q5    1   0.8736  0.6877  0.4382  11.00000  0.05    0.24 
Q6    1   0.7665  0.2356  0.6600  11.00000  0.05    0.24 
Q7    1   0.8161  0.3976  0.5621  11.00000  0.05    0.24 
Q8    1   0.8573  0.5728  0.4516  11.00000  0.05    0.23 
Q9    1   0.8494  0.4501  0.4721  11.00000  0.05    0.22 
Q10   1   0.8096  0.6393  0.4247  11.00000  0.05    0.22 
Q11   1   0.7985  0.6077  0.6057  11.00000  0.05    0.22 
Q12   1   0.4566  0.2185  0.4988  11.00000  0.05    0.22 
Q13   1   0.4848  0.3428  0.3675  11.00000  0.05    0.21 
Q14   1   0.7393  0.3182  0.7256  11.00000  0.05    0.20 
Q15   1   0.5287  0.3907  0.4260  11.00000  0.05    0.20 
Q16   1   0.5677  0.2911  0.4781  11.00000  0.05    0.20 
Q17   1   0.4126  0.1700  0.4492  11.00000  0.05    0.20 
Q18   1   0.5306  0.2240  0.5213  11.00000  0.05    0.20 
Q19   1   0.4472  0.2483  0.4019  11.00000  0.05    0.19 
Q20   1   0.5392  0.3670  0.4002  11.00000  0.05    0.19 
; 
_shelx_res_checksum   35992 
  
_shelx_hkl_file 
; 
  -1   0   0    0.00    0.82 
   1   0   0    0.00    0.82 
   1   0   0    0.00    1.10 
  -1   0   0    0.00    1.10 
  -1   0   0    0.00    1.37 
   1   0   0    0.00    1.37 
   1   0   0    0.00    1.37 
  -1   0   0    0.00    1.37 
   2   0   0  362.29   13.98 
  -3   0   0 1202.26   19.18 
   3   0   0 1222.26   18.64 
  -3   0   0 1149.37   18.09 
   3   0   0 1175.95   18.64 
   3   0   0 1157.59   18.36 
  -3   0   0 1219.80   19.18 
  -4   0   0  225.00    9.32 
   4   0   0  223.08    9.04 
  -4   0   0  220.34    7.13 
   4   0   0  236.23    9.87 
   4   0   0  209.92    7.40 
  -4   0   0  217.32    7.40 
   4   0   0  213.76    7.40 
  -4   0   0  223.08    9.59 
  -5   0   0  541.80   18.64 
   5   0   0  567.56   19.18 
  -5   0   0  554.40   18.91 
   5   0   0  567.56   19.18 
   5   0   0  599.35   12.33 
  -5   0   0  581.53   20.01 
  -5   0   0  558.24   19.18 
  -6   0   0  141.14    5.76 
   6   0   0  143.33    5.76 
  -6   0   0  136.48    6.03 
   6   0   0  133.74    5.76 
   6   0   0  154.29    6.30 
  -6   0   0  152.37    6.03 
   6   0   0  140.04    6.03 
  -6   0   0  145.25    6.30 
  -7   0   0   16.17    2.47 
   7   0   0   18.09    2.47 
  -7   0   0   17.54    3.01 
   7   0   0   19.18    3.29 
   7   0   0   20.55    3.01 
  -7   0   0   20.28    3.29 
   7   0   0   18.91    2.74 
  -7   0   0   25.76    3.29 
  -8   0   0   46.59    3.56 
   8   0   0   46.04    3.84 
  -8   0   0   45.22    3.84 
   8   0   0   48.23    3.84 
   8   0   0   42.75    4.38 
  -8   0   0   50.15    4.66 
   8   0   0   47.14    4.38 
  -8   0   0   47.68    4.38 
  -9   0   0  357.36   10.14 
   9   0   0  406.42   10.69 
  -9   0   0  382.03   10.69 
   9   0   0  406.42   10.96 
   9   0   0  400.94   10.96 
  -9   0   0  384.77   10.96 
  -9   0   0  395.45   11.51 
 -10   0   0    4.11    2.74 
  10   0   0    5.48    2.74 
 -10   0   0    4.66    3.56 
  10   0   0    4.93    3.56 
  10   0   0    4.93    2.74 
 -10   0   0    4.11    2.74 
 -10   0   0    4.38    2.74 
 -10   0   0    3.56    2.74 
 -11   0   0    8.50    3.29 
  11   0   0   10.41    3.01 
 -11   0   0    9.87    3.01 
  11   0   0    8.50    3.01 
  11   0   0   10.14    4.11 
 -11   0   0    8.50    4.11 
 -11   0   0    9.59    3.29 
 -11   0   0    9.87    3.01 
 -12   0   0    3.29    2.74 
  12   0   0    4.11    2.74 
 -12   0   0    3.84    3.29 
  12   0   0    3.84    3.01 
  12   0   0    2.74    3.56 
 -12   0   0    4.11    3.01 
 -12   0   0    3.84    3.84 
 -12   0   0    4.11    4.11 
 -13   0   0   29.32    3.56 
  13   0   0   30.42    3.29 
 -13   0   0   30.69    5.21 
  13   0   0   29.87    4.66 
  13   0   0   26.86    4.11 
 -13   0   0   28.50    4.11 
 -13   0   0   30.42    5.21 
 -13   0   0   27.41    4.38 
 -14   0   0   15.89    3.56 
  14   0   0   19.18    3.84 
 -14   0   0   14.80    4.11 
  14   0   0   18.09    3.84 
  14   0   0   21.10    4.11 
 -14   0   0   18.09    4.66 
 -14   0   0   16.44    3.84 
 -14   0   0   16.44    3.84 
  15   0   0  475.20   19.73 
 -15   0   0  486.17   20.28 
  15   0   0  509.19   20.83 
  15   0   0  466.16   20.01 
 -15   0   0  500.69   20.83 
 -15   0   0  497.68   20.83 
 -15   0   0  499.87   20.83 
  16   0   0  859.70   13.70 
  16   0   0  837.50   30.42 
  16   0   0  831.74   30.69 
 -16   0   0  806.53   29.87 
 -16   0   0  868.47   16.99 
  17   0   0  126.06    7.40 
  17   0   0  124.69    7.40 
 -17   0   0  115.10    8.77 
  17   0   0  124.97    8.50 
  17   0   0  129.90    8.22 
 -17   0   0  118.94    7.95 
 -17   0   0  128.80    9.32 
 -17   0   0  120.03    8.50 
  18   0   0  402.03   10.41 
  18   0   0  404.77   10.41 
 -18   0   0  326.67   17.27 
  18   0   0  392.17   10.14 
  18   0   0  351.06   18.36 
 -18   0   0  337.36   18.36 
 -18   0   0  357.09   18.91 
 -18   0   0  376.00   10.69 
  19   0   0  109.35    6.30 
  19   0   0  113.46    6.30 
 -19   0   0   84.13    6.30 
  19   0   0   96.47    6.58 
  19   0   0   90.44    6.85 
 -19   0   0   91.53    6.58 
 -19   0   0   91.81    6.85 
 -19   0   0   94.27    6.85 
  20   0   0   19.73    5.76 
  20   0   0   16.17    6.03 
 -20   0   0   16.99    5.21 
  20   0   0   18.09    4.93 
  20   0   0   15.35    4.93 
 -20   0   0   15.89    5.21 
 -20   0   0   19.73    5.48 
 -20   0   0   16.44    5.21 
 -21   0   0    2.74    6.58 
  21   0   0    6.85    6.03 
  21   0   0    6.03    5.21 
 -21   0   0    4.93    5.48 
 -21   0   0    4.66    6.30 
 -21   0   0    9.87    7.67 
 -22   0   0   11.24    7.40 
  22   0   0   19.46    6.85 
  22   0   0   16.99    5.76 
 -22   0   0   13.70    7.40 
 -22   0   0   17.54    7.95 
 -22   0   0   12.61    6.85 
   0  -1   0    0.82    1.92 
   0   1   0    0.00    1.92 
   0  -1   0    0.00    1.92 
   0   1   0    0.55    1.64 
   0   1   0    0.82    2.47 
   0  -1   0    0.00    2.47 
   1  -1   0   14.25    3.01 
  -1   1   0    3.84    3.01 
   1   1   0    0.27    1.37 
  -1  -1   0   12.06    2.19 
   1  -1   0   12.61    2.19 
  -1   1   0   13.70    2.19 
   1   1   0   13.70    3.29 
  -1  -1   0    8.22    2.74 
  -1  -1   0   13.98    3.29 
   1   1   0    4.93    3.29 
  -1   1   0   14.52    3.01 
   1  -1   0    0.27    2.47 
  -1   1   0   14.80    3.56 
   1  -1   0    7.40    3.29 
   1   1   0   13.98    3.56 
  -1  -1   0    1.10    3.01 
  -2   1   0  935.61   15.89 
  -2  -1   0  945.47   15.89 
   2   1   0 1001.11   16.99 
   2  -1   0  944.93   17.81 
   2  -1   0  946.30   16.72 
  -3   1   0 1301.74   19.46 
   3   1   0 1339.01   20.01 
   4   1   0   86.60    4.38 
  -4   1   0   86.87    4.66 
   4  -1   0   90.44    4.66 
  -4  -1   0   91.26    4.66 
   4   1   0   96.47    4.93 
  -4   1   0   91.81    4.93 
   4  -1   0   92.63    4.66 
   4   1   0   91.81    4.93 
  -4  -1   0   99.48    4.93 
   4  -1   0   90.98    5.21 
  -4   1   0   91.53    4.93 
   4  -1   0   90.98    5.21 
  -4   1   0   85.78    5.21 
  -4  -1   0   91.26    4.93 
   4   1   0   95.37    5.21 
  -5   1   0    0.82    2.19 
   5   1   0    0.27    1.92 
   5  -1   0    0.27    2.19 
   5   1   0    0.00    1.64 
  -5  -1   0   -1.10    1.92 
   5   1   0    1.10    2.74 
  -5   1   0   -0.27    1.64 
   5  -1   0    0.00    2.19 
  -5  -1   0   -1.10    2.19 
   5  -1   0   -0.55    2.47 
  -5   1   0    0.00    2.19 
   5  -1   0    0.00    1.92 
  -5   1   0    1.64    2.74 
  -5  -1   0    0.00    2.74 
   5   1   0   -0.82    2.47 
  -6   1   0   96.74    4.93 
   6   1   0  100.58    5.48 
   6  -1   0  103.32    4.93 
  -6  -1   0   97.01    4.93 
   6   1   0  107.15    5.21 
  -6   1   0   99.75    4.93 
   6  -1   0  101.40    4.93 
   6   1   0  101.12    5.21 
  -6  -1   0   95.92    5.21 
   6  -1   0   99.75    5.21 
  -6   1   0  104.14    5.21 
  -6  -1   0  100.30    5.21 
   6  -1   0   95.64    5.48 
  -6   1   0  100.85    5.76 
  -6  -1   0   98.66    5.48 
  -7   1   0   92.63    4.66 
   7  -1   0   95.64    5.21 
   7   1   0   99.48    4.93 
  -7  -1   0   94.00    4.93 
  -7   1   0   89.89    4.93 
   7   1   0  105.51    5.21 
   7  -1   0   97.01    5.21 
   7   1   0  100.85    5.21 
  -7  -1   0  104.14    5.76 
   7  -1   0   99.21    5.21 
  -7   1   0  100.30    5.21 
  -7  -1   0  100.03    5.21 
   7  -1   0   98.93    5.48 
  -7   1   0   97.29    5.48 
  -7  -1   0  101.40    5.21 
  -8   1   0   59.47    4.11 
   8  -1   0   66.87    4.38 
   8   1   0   66.32    4.11 
  -8  -1   0   53.99    4.66 
  -8   1   0   65.22    4.66 
   8   1   0   68.24    4.38 
   8  -1   0   57.28    4.38 
   8   1   0   71.53    5.21 
  -8  -1   0   67.96    4.66 
   8  -1   0   68.51    4.38 
  -8   1   0   65.50    4.66 
  -8  -1   0   63.58    4.93 
   8  -1   0   67.42    4.66 
  -8   1   0   68.79    5.21 
  -8  -1   0   70.70    4.66 
  -9   1   0   20.28    3.29 
   9  -1   0   24.12    3.01 
   9   1   0   23.84    2.74 
   9   1   0   23.57    2.74 
  -9  -1   0   23.84    3.56 
  -9   1   0   21.38    3.84 
   9   1   0   23.84    3.29 
   9  -1   0   25.21    3.01 
   9   1   0   24.12    3.29 
   9  -1   0   21.38    3.84 
  -9  -1   0   23.84    3.56 
  -9   1   0   21.92    3.56 
  -9  -1   0   26.03    3.56 
   9  -1   0   24.39    3.29 
  -9   1   0   21.65    4.11 
  -9  -1   0   24.66    3.29 
 -10   1   0  141.41    7.13 
  10  -1   0  151.28    6.85 
  10   1   0  151.55    6.85 
  10   1   0  145.25    6.85 
 -10  -1   0  143.88    7.13 
 -10   1   0  136.48    7.13 
  10   1   0  143.33    7.13 
  10  -1   0  150.73    7.13 
  10   1   0  145.52    7.13 
  10  -1   0  147.71    7.13 
 -10  -1   0  128.26    7.40 
 -10   1   0  138.94    7.13 
  10  -1   0  139.49    6.85 
 -10  -1   0  141.41    7.67 
 -10   1   0  141.96    7.67 
 -10  -1   0  144.97    7.13 
 -11   1   0  109.35    5.48 
  11  -1   0  112.91    5.21 
  11   1   0  113.73    5.48 
  11   1   0  112.63    5.48 
 -11  -1   0  111.26    5.76 
 -11   1   0  101.95    6.03 
  11   1   0   92.63    5.76 
  11  -1   0   97.56    5.76 
  11   1   0  109.89    5.76 
  11  -1   0  108.80    5.76 
 -11  -1   0  102.49    6.03 
 -11   1   0  110.99    5.76 
  11  -1   0  101.95    6.03 
 -11  -1   0  111.81    6.30 
 -11   1   0  105.51    6.03 
 -11  -1   0  106.61    5.76 
 -12   1   0   78.65    4.66 
  12  -1   0   90.98    4.93 
  12   1   0   89.34    4.66 
  12   1   0   85.50    4.93 
 -12  -1   0   82.76    5.48 
 -12   1   0   83.31    6.03 
  12   1   0   90.71    6.03 
  12  -1   0   87.42    5.21 
  12   1   0   84.68    5.76 
  12  -1   0   83.86    5.21 
 -12  -1   0   80.30    5.76 
 -12   1   0   85.50    5.21 
  12  -1   0   88.24    5.76 
 -12  -1   0   88.79    5.76 
 -12   1   0   85.23    5.48 
 -12  -1   0   80.57    5.76 
 -13   1   0   -0.82    3.01 
  13  -1   0    0.27    2.74 
  13   1   0    1.10    3.01 
  13   1   0    0.27    2.74 
 -13  -1   0    1.64    3.29 
 -13   1   0    0.55    4.38 
  13   1   0    1.37    3.01 
  13  -1   0    1.37    3.56 
  13   1   0    1.92    3.29 
  13  -1   0    0.55    3.01 
 -13  -1   0    1.10    3.84 
 -13   1   0    2.74    4.66 
  13  -1   0    0.55    3.01 
 -13  -1   0    1.64    3.29 
 -13   1   0    0.00    3.29 
 -13  -1   0    0.55    3.01 
 -14   1   0   23.02    4.38 
  14  -1   0   25.49    3.56 
  14   1   0   26.31    3.84 
  14   1   0   25.21    3.84 
 -14  -1   0   19.46    4.93 
 -14   1   0   18.91    4.38 
  14   1   0   24.39    4.11 
  14  -1   0   22.75    3.84 
  14   1   0   25.76    4.11 
  14  -1   0   25.21    4.11 
 -14  -1   0   23.29    4.66 
 -14   1   0   23.84    4.11 
  14  -1   0   19.46    3.84 
 -14  -1   0   23.57    4.38 
 -14   1   0   25.49    4.93 
 -14  -1   0   21.65    4.11 
 -15   1   0   25.49    4.38 
  15  -1   0   27.41    3.84 
  15   1   0   26.03    4.11 
  15   1   0   25.76    4.11 
 -15  -1   0   20.55    4.11 
 -15   1   0   21.38    4.11 
  15   1   0   28.50    4.11 
  15  -1   0   23.57    4.11 
  15   1   0   25.49    4.38 
  15  -1   0   24.94    4.11 
 -15  -1   0   22.20    5.21 
 -15   1   0   22.47    5.21 
 -15  -1   0   25.76    4.66 
 -15   1   0   23.57    4.38 
 -15  -1   0   24.39    4.38 
 -15   1   0   22.20    4.38 
 -16   1   0  208.55   10.14 
  16  -1   0  234.31   10.96 
  16   1   0  249.11   11.24 
  16   1   0  231.02   10.41 
 -16  -1   0  202.80   10.14 
 -16   1   0  201.15   10.14 
  16   1   0  226.09   10.69 
  16  -1   0  212.66   10.41 
  16   1   0  225.82   10.96 
  16  -1   0  215.13   10.41 
 -16  -1   0  217.05   11.24 
 -16   1   0  214.58   10.69 
 -16  -1   0  211.57   10.69 
 -16   1   0  189.64   10.41 
 -16  -1   0  198.41   10.14 
 -16   1   0  213.49   10.69 
 -17   1   0   34.53    4.93 
  17  -1   0   40.29    5.76 
  17   1   0   40.56    5.21 
  17   1   0   35.63    4.66 
 -17  -1   0   32.34    5.48 
 -17   1   0   37.82    4.93 
  17   1   0   41.11    6.03 
  17  -1   0   35.08    4.66 
  17   1   0   40.01    5.21 
  17  -1   0   37.27    4.93 
 -17  -1   0   38.92    6.85 
 -17   1   0   37.00    5.21 
 -17  -1   0   38.37    5.21 
 -17   1   0   40.01    5.48 
 -17  -1   0   36.17    4.93 
 -17   1   0   37.27    4.93 
  18  -1   0    0.00    4.11 
  18   1   0    0.00    4.11 
  18   1   0    0.27    3.84 
 -18  -1   0    0.82    4.38 
 -18   1   0    1.10    4.38 
  18   1   0   -1.10    4.11 
  18  -1   0   -0.82    4.38 
  18   1   0   -0.27    4.38 
  18  -1   0    1.92    4.38 
 -18  -1   0    1.10    5.76 
 -18   1   0   -0.82    4.38 
 -18  -1   0    0.27    4.66 
 -18   1   0    0.55    4.66 
 -18  -1   0    1.10    4.66 
 -18   1   0    2.19    4.38 
  19  -1   0    0.55    4.11 
  19   1   0    0.27    3.56 
  19   1   0   -1.37    4.93 
  19  -1   0   -1.10    3.84 
 -19  -1   0   -1.92    4.66 
 -19   1   0    1.37    5.76 
  19   1   0    0.00    4.38 
  19  -1   0    1.64    5.76 
  19   1   0    0.00    4.66 
  19  -1   0   -1.64    4.38 
 -19  -1   0    0.00    4.66 
 -19   1   0   -1.37    6.58 
 -19  -1   0   -0.55    4.93 
 -19   1   0   -0.55    6.30 
 -19  -1   0   -0.55    4.66 
 -19   1   0   -0.27    4.93 
  20  -1   0    5.76    5.76 
  20  -1   0    5.21    4.93 
 -20  -1   0    2.47    6.03 
 -20   1   0    4.38    6.58 
  20   1   0    6.58    4.66 
  20  -1   0    3.29    4.66 
  20   1   0    6.58    6.58 
  20  -1   0    3.29    4.93 
 -20  -1   0    5.48    4.93 
 -20   1   0    6.58    5.48 
 -20  -1   0    1.92    5.21 
 -20   1   0    4.11    5.21 
 -20  -1   0    4.66    6.30 
 -20   1   0    3.84    5.48 
  21  -1   0    4.93    6.03 
  21  -1   0    3.29    5.76 
 -21   1   0   -1.64    5.76 
 -21  -1   0    1.37    5.21 
  21   1   0    0.00    4.93 
  21  -1   0    1.10    4.93 
  21   1   0    0.82    5.21 
  21  -1   0    2.47    5.21 
 -21  -1   0    0.00    5.21 
 -21   1   0    1.37    5.48 
 -21  -1   0    4.11    5.48 
 -21   1   0    0.27    6.03 
 -21  -1   0    0.55    6.03 
 -21   1   0    2.74    5.48 
 -22  -1   0    0.27    5.76 
 -22   1   0    0.55    6.03 
  22   1   0   -2.19    5.76 
  22  -1   0   -3.29    7.13 
  22   1   0    0.27    5.48 
  22  -1   0    0.27    7.40 
 -22  -1   0   -2.19    5.48 
 -22   1   0    0.00    8.22 
 -22  -1   0    0.00    6.58 
 -22   1   0    1.64    7.40 
 -22  -1   0    1.10    5.76 
 -22   1   0   -1.10    5.76 
   0   2   0  486.99   16.99 
   0  -2   0  513.30   17.81 
   0  -2   0  517.41   18.09 
   0   2   0  512.20   17.81 
   0  -2   0  517.96   18.09 
   0   2   0  512.47   18.09 
  -1   2   0   86.05    4.66 
   1   2   0   85.23    4.66 
   1  -2   0   91.53    4.66 
  -1  -2   0   88.79    4.66 
   1  -2   0   89.34    5.76 
  -1   2   0  103.59    5.76 
  -1  -2   0   75.91    4.66 
   1   2   0   87.97    4.66 
   1   2   0   85.50    4.93 
  -1  -2   0   87.15    4.93 
   1  -2   0   88.52    4.93 
  -1   2   0   77.28    4.66 
   1  -2   0   85.78    5.21 
  -1   2   0   86.05    5.21 
  -1  -2   0   84.96    4.93 
   1   2   0   90.98    4.93 
  -2   2   0  428.61   15.35 
   2  -2   0  459.86   16.17 
   2   2   0  428.89   15.35 
  -2  -2   0  463.69   16.44 
   2  -2   0  424.78   15.89 
  -2   2   0  449.99   16.17 
  -2  -2   0  429.71   15.35 
   2   2   0  468.63   16.72 
   2   2   0  444.24   15.89 
   2  -2   0  454.38   16.44 
  -2   2   0  449.99   16.44 
   2  -2   0  437.66   16.17 
  -2   2   0  420.94   15.89 
  -2  -2   0  439.85   15.89 
   2   2   0  465.89   16.72 
  -3   2   0  306.66   11.78 
   3  -2   0  312.14   12.06 
   3   2   0  308.85   11.78 
  -3  -2   0  318.17   12.06 
  -3   2   0  327.22   12.88 
  -3  -2   0  298.44   11.51 
   3   2   0  288.57   12.06 
  -3   2   0  307.48   12.06 
   3   2   0  314.61   12.33 
  -3  -2   0  321.46   12.88 
   3  -2   0  305.84   12.06 
  -3   2   0  337.08   12.88 
   3  -2   0  312.42   12.61 
  -3   2   0  334.07   13.15 
  -3  -2   0  317.35   12.61 
   3   2   0  332.15   12.88 
  -4   2   0    8.50    2.19 
   4  -2   0    8.77    2.74 
   4   2   0    0.00    1.37 
  -4  -2   0    9.32    1.92 
  -4  -2   0    7.95    3.01 
   4   2   0   10.41    3.01 
  -4   2   0    9.04    2.19 
   4  -2   0    9.87    2.47 
   4   2   0    9.04    2.74 
  -4  -2   0    9.32    2.47 
   4  -2   0    8.50    2.47 
  -4   2   0   10.96    3.01 
   4  -2   0    8.77    2.74 
  -4   2   0    9.59    2.47 
  -4  -2   0   11.51    3.29 
   4   2   0   10.41    2.47 
  -5   2   0   48.23    3.56 
   5  -2   0   50.70    3.84 
   5   2   0    0.00    0.82 
  -5  -2   0   48.78    3.84 
   5   2   0   51.80    3.84 
  -5   2   0   48.78    3.84 
   5  -2   0   51.25    3.56 
   5   2   0   53.71    4.11 
  -5  -2   0   46.59    3.84 
   5  -2   0   51.25    4.38 
  -5   2   0   54.54    4.38 
   5  -2   0   51.25    4.38 
  -5   2   0   50.70    4.11 
  -5  -2   0   47.14    3.84 
   5   2   0   50.43    4.11 
  -6   2   0  286.93   11.24 
   6  -2   0  309.68   11.78 
  -6  -2   0  290.22   11.51 
   6   2   0  288.30   11.51 
  -6   2   0  279.81   11.24 
   6  -2   0  302.28   11.78 
   6   2   0  312.69   12.61 
  -6  -2   0  286.11   11.78 
   6  -2   0  290.77   11.51 
  -6   2   0  292.14   11.51 
   6  -2   0  308.03   12.61 
  -6   2   0  290.22   11.78 
  -6  -2   0  265.55   10.96 
   6   2   0  303.37   12.33 
  -7   2   0  300.91   11.78 
   7  -2   0  322.56   12.33 
   7   2   0  320.64   12.06 
  -7  -2   0  308.31   12.33 
   7   2   0  285.83   11.78 
  -7   2   0  320.64   12.33 
   7  -2   0  320.36   12.06 
   7   2   0  318.17   12.33 
  -7  -2   0  306.66   12.06 
   7  -2   0  306.66   12.06 
  -7   2   0  314.88   12.33 
   7  -2   0  296.25   12.06 
  -7   2   0  299.26   12.33 
  -7  -2   0  315.43   12.33 
   7   2   0  311.60   12.33 
  -8   2   0  182.52    7.95 
   8  -2   0  215.95    8.50 
   8   2   0  205.54    8.22 
  -8  -2   0  204.44    8.77 
   8   2   0  220.06    8.77 
  -8   2   0  204.44    8.22 
   8  -2   0  217.05    8.50 
   8   2   0  215.95    9.04 
  -8  -2   0  206.09    8.77 
   8  -2   0  220.88    9.32 
  -8   2   0  203.35    8.50 
   8  -2   0  215.40    9.04 
  -8   2   0  193.75    8.77 
  -8  -2   0  216.23    9.04 
   8   2   0  209.92    9.04 
  -9   2   0   11.51    3.56 
   9  -2   0   11.24    3.01 
   9   2   0   12.61    3.01 
   9   2   0   -0.27    2.47 
  -9  -2   0   11.24    3.01 
  -9   2   0   12.88    3.56 
   9   2   0   11.78    3.01 
   9  -2   0   11.24    3.29 
   9   2   0   12.33    4.11 
  -9  -2   0   13.70    4.11 
   9  -2   0   12.33    3.01 
  -9   2   0   12.88    3.01 
  -9  -2   0   12.06    4.11 
   9  -2   0   12.06    3.01 
  -9   2   0   13.15    3.01 
  -9  -2   0   12.88    4.11 
 -10   2   0    1.64    3.56 
  10  -2   0    2.47    3.01 
  10   2   0    1.92    3.29 
  10   2   0    0.00    3.01 
 -10  -2   0    0.82    2.74 
 -10   2   0    1.64    2.19 
  10   2   0    0.00    2.74 
  10  -2   0    1.64    2.47 
  10   2   0    1.10    3.29 
 -10  -2   0    1.37    2.74 
  10  -2   0    1.10    2.47 
 -10   2   0    1.64    3.29 
 -10  -2   0    1.64    2.74 
  10  -2   0    2.19    2.74 
 -10   2   0    2.47    3.84 
 -10  -2   0    1.37    3.01 
 -11   2   0   10.41    3.01 
  11  -2   0   15.07    3.01 
  11   2   0   13.15    2.74 
  11   2   0    5.21    2.47 
 -11  -2   0    7.95    3.56 
 -11   2   0   11.78    3.29 
  11   2   0   12.06    3.56 
  11  -2   0   12.33    3.01 
  11   2   0   14.52    3.29 
 -11  -2   0   12.33    4.38 
  11  -2   0   11.24    3.84 
 -11   2   0    9.87    4.38 
 -11  -2   0   12.61    3.29 
  11  -2   0   11.78    4.38 
 -11   2   0   10.41    3.29 
 -11  -2   0   12.33    3.29 
 -12   2   0   54.54    4.38 
  12  -2   0   58.37    4.38 
  12   2   0   64.40    4.38 
  12   2   0   50.70    3.84 
 -12  -2   0   48.78    4.38 
 -12   2   0   53.17    4.93 
  12   2   0   54.54    4.93 
  12  -2   0   57.28    4.38 
  12   2   0   57.82    4.66 
 -12  -2   0   60.02    4.93 
  12  -2   0   60.02    4.93 
 -12   2   0   56.18    4.66 
 -12  -2   0   53.44    4.66 
  12  -2   0   54.81    4.66 
 -12   2   0   57.28    4.93 
 -12  -2   0   55.91    4.66 
 -13   2   0    6.30    3.01 
  13  -2   0    6.58    3.01 
  13   2   0    5.76    2.74 
  13   2   0    5.76    2.74 
 -13  -2   0    3.56    3.29 
 -13   2   0    3.84    4.11 
  13   2   0    5.76    4.38 
  13  -2   0    4.11    4.11 
  13   2   0    4.66    4.11 
  13  -2   0    6.03    4.11 
 -13  -2   0    4.93    3.56 
 -13   2   0    5.48    3.29 
  13  -2   0    4.11    4.66 
 -13  -2   0    6.30    4.38 
 -13   2   0    5.76    3.56 
 -13  -2   0    6.30    3.56 
 -14   2   0  106.88    6.30 
  14  -2   0  114.28    6.85 
  14   2   0  103.87    6.03 
  14   2   0  109.62    6.03 
 -14  -2   0   97.56    5.76 
 -14   2   0  109.89    7.67 
  14   2   0  123.05    7.95 
  14  -2   0  104.96    6.30 
  14   2   0  114.28    7.95 
  14  -2   0  108.25    7.13 
 -14  -2   0  102.49    6.03 
 -14   2   0   98.93    6.03 
  14  -2   0   98.11    5.76 
 -14  -2   0  104.14    6.58 
 -14   2   0  103.04    6.85 
 -14  -2   0  100.30    6.03 
 -15   2   0  134.28    6.58 
  15  -2   0  145.79    8.22 
  15   2   0  169.36    8.77 
  15   2   0  161.42    8.50 
 -15  -2   0  140.59    8.22 
 -15   2   0  146.62    9.32 
  15   2   0  154.56    8.77 
  15  -2   0  147.17    8.22 
  15   2   0  163.33    9.04 
  15  -2   0  141.41    8.22 
 -15  -2   0  156.48    9.04 
 -15   2   0  148.81    9.32 
  15  -2   0  153.19    8.77 
 -15  -2   0  157.30    9.04 
 -15   2   0  146.89    8.77 
 -15  -2   0  129.90    7.67 
 -16   2   0   45.77    5.48 
  16  -2   0   68.51    6.03 
  16   2   0   70.16    5.48 
  16   2   0   56.45    4.38 
 -16  -2   0   58.92    5.21 
 -16   2   0   46.04    6.03 
  16   2   0   64.68    5.76 
  16  -2   0   60.57    5.76 
  16   2   0   66.87    6.03 
  16  -2   0   63.31    5.48 
 -16  -2   0   67.96    7.40 
 -16   2   0   64.40    5.76 
  16  -2   0   59.47    6.03 
 -16  -2   0   62.48    7.13 
 -16   2   0   64.40    7.13 
 -16  -2   0   60.84    5.48 
 -17   2   0  243.36   12.88 
  17  -2   0  242.26   12.88 
 -17  -2   0  253.50   13.43 
 -17   2   0  209.37   12.33 
  17   2   0  261.72   13.70 
  17  -2   0  260.90   13.43 
  17   2   0  285.83   15.62 
  17  -2   0  248.29   13.15 
 -17  -2   0  264.18   14.80 
 -17   2   0  245.28   13.15 
  17  -2   0  248.56   13.70 
 -17  -2   0  254.59   14.25 
 -17   2   0  258.16   13.98 
 -17  -2   0  237.88   12.88 
 -18   2   0  102.77    7.95 
  18  -2   0  111.26    8.22 
  18   2   0  118.94    8.50 
 -18  -2   0   95.92    7.95 
 -18   2   0   87.42    8.22 
  18   2   0  118.12    8.77 
  18  -2   0   99.75    8.50 
  18   2   0  121.40    9.04 
  18  -2   0  104.41    8.50 
 -18  -2   0  101.12    9.04 
 -18   2   0  120.86   10.14 
 -18  -2   0  103.32    8.77 
 -18   2   0  113.73    9.04 
 -18  -2   0  103.87    9.59 
 -18   2   0  101.12    8.22 
 -19   2   0    8.77    4.66 
  19  -2   0    7.67    4.38 
 -19  -2   0    3.29    6.30 
 -19   2   0    7.13    5.21 
  19   2   0    3.84    4.66 
  19  -2   0    3.84    4.38 
  19   2   0    4.38    5.21 
  19  -2   0    4.11    5.48 
 -19  -2   0    8.22    6.30 
 -19   2   0    6.85    4.93 
 -19  -2   0    4.11    5.21 
 -19   2   0    6.85    5.21 
 -19  -2   0    8.22    4.93 
 -19   2   0    9.32    4.93 
  20  -2   0   24.12    4.93 
 -20  -2   0   21.92    5.48 
 -20   2   0   20.83    5.48 
  20   2   0   17.54    6.30 
  20  -2   0   25.21    5.21 
  20   2   0   22.20    5.48 
  20  -2   0   22.20    6.85 
 -20  -2   0   23.84    7.13 
 -20   2   0   24.12    6.85 
 -20  -2   0   21.65    5.76 
 -20   2   0   22.75    5.76 
 -20  -2   0   18.64    7.13 
 -20   2   0   25.49    5.48 
  21  -2   0   28.78    5.76 
  21  -2   0   26.58    5.48 
 -21  -2   0   29.87    6.03 
 -21   2   0   21.10    6.03 
  21   2   0   22.75    6.58 
  21  -2   0   26.58    7.13 
  21   2   0   19.73    6.58 
  21  -2   0   23.29    7.13 
 -21  -2   0   24.94    7.40 
 -21   2   0   23.29    5.76 
 -21  -2   0   23.84    6.03 
 -21   2   0   26.03    6.03 
 -21  -2   0   21.65    5.76 
 -21   2   0   24.66    6.03 
  22  -2   0    1.92    7.40 
  22  -2   0    1.64    5.48 
 -22  -2   0   -2.47    7.67 
 -22   2   0    1.37    6.03 
  22   2   0    2.47    5.21 
  22  -2   0    0.00    5.21 
  22   2   0    0.82    5.76 
  22  -2   0    0.55    7.40 
 -22  -2   0   -0.27    7.40 
 -22   2   0    0.55    6.85 
 -22  -2   0   -1.64    6.03 
 -22   2   0   -0.82    7.13 
 -22  -2   0    4.11    7.40 
 -22   2   0   -0.27    6.03 
   0   3   0   -0.55    1.64 
   0  -3   0    0.00    2.19 
   0  -3   0    0.00    1.92 
   0   3   0    0.00    2.19 
   0  -3   0    0.27    1.92 
   0  -3   0   -0.82    2.74 
   0  -3   0   -0.27    1.92 
   0   3   0   -0.27    1.92 
  -1   3   0  381.48   13.98 
   1   3   0  343.11   12.88 
   1  -3   0  386.96   14.25 
  -1  -3   0  391.89   14.25 
   1  -3   0  395.73   14.80 
  -1   3   0  414.91   15.07 
  -1  -3   0  380.11   14.25 
   1   3   0  391.62   14.25 
  -1  -3   0  384.22   14.25 
   1  -3   0  395.45   15.07 
  -1   3   0  404.77   14.80 
   1  -3   0  393.81   15.07 
  -1   3   0  402.31   15.07 
  -1  -3   0  383.94   14.52 
   1   3   0  371.61   13.98 
  -2   3   0  890.12   15.35 
   2   3   0  901.08   15.35 
   2  -3   0  936.16   15.89 
  -2  -3   0  886.28   15.35 
   2  -3   0  948.76   16.99 
  -2   3   0  919.71   16.17 
  -2  -3   0  862.98   16.17 
   2   3   0  935.88   16.17 
   2   3   0  947.39   17.27 
  -2  -3   0  903.27   16.17 
   2  -3   0  915.60   16.44 
  -2   3   0  950.68   17.27 
   2  -3   0  890.94   16.44 
  -2  -3   0  883.81   16.44 
   2   3   0  938.35   16.44 
  -3   3   0    0.00    1.92 
   3   3   0    1.92    1.64 
   3  -3   0    0.27    1.92 
  -3  -3   0    0.00    1.64 
   3  -3   0    0.82    1.92 
  -3   3   0    0.00    1.92 
  -3  -3   0    0.00    2.47 
   3   3   0   -0.27    3.01 
   3   3   0   -0.27    2.47 
  -3  -3   0    0.55    2.47 
   3  -3   0    0.27    2.19 
  -3   3   0    0.27    1.92 
   3  -3   0    0.00    3.01 
  -3   3   0    1.10    2.19 
  -3  -3   0    0.27    2.47 
   3   3   0    0.00    1.92 
  -4   3   0  238.97    9.87 
   4   3   0  246.10    9.87 
   4  -3   0  252.95   10.14 
  -4  -3   0  235.14    9.59 
  -4   3   0  246.92   10.41 
  -4  -3   0  239.52    9.87 
   4   3   0  249.93   10.14 
  -4   3   0  218.69    7.40 
   4   3   0  254.87   10.69 
  -4  -3   0  256.51   10.69 
   4  -3   0  230.20    9.87 
  -4   3   0  257.61   10.96 
   4  -3   0  241.16   10.41 
  -4   3   0  240.34   10.41 
  -4  -3   0  215.40    7.40 
   4   3   0  235.68   10.14 
  -5   3   0  110.99    5.21 
   5   3   0  110.99    5.48 
   5  -3   0  115.65    5.21 
  -5  -3   0  115.10    5.48 
  -5   3   0  109.89    5.48 
  -5  -3   0  104.69    5.21 
   5   3   0  112.09    5.48 
  -5   3   0  109.89    5.21 
   5   3   0  121.13    6.30 
  -5  -3   0  112.09    5.76 
   5  -3   0  111.81    5.76 
  -5   3   0  116.75    5.48 
   5  -3   0  121.40    6.30 
  -5   3   0  111.81    5.48 
  -5  -3   0  115.38    5.76 
   5   3   0  116.75    5.76 
   6   3   0    0.00    1.64 
  -6   3   0   40.56    4.38 
   6  -3   0   40.83    3.56 
  -6  -3   0   41.66    3.56 
  -6   3   0   37.82    3.29 
  -6  -3   0   35.90    3.84 
   6   3   0   42.20    3.56 
  -6   3   0   33.98    3.29 
   6   3   0   45.49    4.11 
  -6  -3   0   40.83    4.11 
   6  -3   0   41.93    4.11 
  -6   3   0   45.49    4.38 
   6  -3   0   46.86    4.11 
  -6   3   0   45.77    4.11 
  -6  -3   0   39.74    3.84 
   6   3   0   42.48    3.84 
  -7   3   0  166.35    7.67 
   7  -3   0  176.76    7.95 
  -7  -3   0  165.25    7.40 
   7   3   0  181.15    7.95 
  -7   3   0  161.14    7.40 
   7  -3   0  178.95    7.95 
   7   3   0  175.39    8.22 
  -7  -3   0  170.19    7.95 
   7  -3   0  170.19    8.22 
  -7   3   0  167.99    7.95 
   7  -3   0  175.12    7.95 
  -7   3   0  175.39    7.95 
  -7  -3   0  165.80    7.95 
   7   3   0  178.95    8.50 
  -8   3   0   -0.27    3.29 
   8  -3   0    0.55    2.47 
  -8  -3   0   -0.55    2.47 
   8   3   0   -0.27    3.56 
  -8   3   0    0.82    2.19 
   8  -3   0    0.82    2.19 
   8   3   0    0.00    3.84 
  -8  -3   0    2.19    2.74 
   8  -3   0   10.14    3.29 
  -8   3   0    0.27    2.74 
   8  -3   0    4.93    3.84 
  -8   3   0    0.00    3.29 
  -8  -3   0   -0.27    3.56 
   8   3   0    1.10    3.01 
  -9   3   0  129.63    7.13 
   9  -3   0  133.46    6.85 
  -9  -3   0  125.52    6.58 
   9   3   0  147.71    7.67 
  -9   3   0  125.79    6.58 
   9  -3   0  135.38    6.58 
   9   3   0  138.12    6.85 
  -9  -3   0  131.82    6.85 
   9  -3   0  141.68    6.85 
  -9   3   0  127.71    7.13 
   9  -3   0  128.80    6.85 
  -9   3   0  142.78    7.67 
  -9  -3   0  141.41    7.67 
   9   3   0  134.83    6.85 
 -10   3   0  106.06    6.30 
  10  -3   0   98.11    5.21 
 -10  -3   0   95.92    5.48 
 -10   3   0   97.29    5.48 
  10   3   0  104.96    6.30 
  10  -3   0  102.49    5.48 
  10   3   0  109.35    6.03 
 -10  -3   0   99.21    6.30 
  10  -3   0  101.12    5.48 
 -10   3   0  112.09    6.03 
  10  -3   0  103.59    5.76 
 -10   3   0  102.22    5.76 
 -10  -3   0   96.47    5.48 
  10   3   0   95.37    5.48 
 -11   3   0   68.51    5.48 
  11  -3   0   84.13    5.76 
 -11  -3   0   59.19    4.66 
 -11   3   0   66.05    4.38 
  11   3   0   71.80    5.76 
  11  -3   0   71.25    4.38 
  11   3   0   71.80    5.21 
 -11  -3   0   69.06    5.21 
  11  -3   0   64.68    4.66 
 -11   3   0   66.32    4.66 
 -11  -3   0   71.80    5.21 
  11  -3   0   71.25    4.93 
 -11   3   0   67.96    5.21 
 -11  -3   0   62.21    5.76 
 -12   3   0    1.10    4.11 
  12  -3   0    4.11    3.01 
 -12  -3   0    3.84    3.84 
 -12   3   0    2.74    3.56 
  12   3   0    4.38    4.11 
  12  -3   0    1.64    3.29 
  12   3   0    5.76    3.56 
 -12  -3   0    3.01    4.38 
  12  -3   0    4.38    3.29 
 -12   3   0    3.84    4.11 
 -12  -3   0    2.19    4.66 
  12  -3   0    3.56    3.29 
 -12   3   0    4.11    3.56 
 -12  -3   0    3.56    3.29 
 -13   3   0   52.62    5.21 
  13  -3   0   51.25    4.38 
 -13  -3   0   46.86    4.66 
 -13   3   0   50.70    5.21 
  13   3   0   52.07    4.93 
  13  -3   0   48.51    4.93 
  13   3   0   50.15    4.93 
 -13  -3   0   44.67    4.66 
  13  -3   0   50.70    4.66 
 -13   3   0   47.14    4.66 
 -13  -3   0   48.78    4.93 
  13  -3   0   54.54    4.93 
 -13   3   0   55.08    6.30 
 -13  -3   0   50.43    4.93 
 -14   3   0  132.64    6.30 
  14  -3   0  137.85    7.67 
 -14  -3   0  127.98    6.58 
 -14   3   0  144.15    8.22 
  14   3   0  144.42    8.22 
  14  -3   0  140.86    7.95 
  14   3   0  138.12    8.22 
 -14  -3   0  134.28    6.85 
  14  -3   0  140.04    8.50 
 -14   3   0  137.85    8.22 
 -14  -3   0  132.09    7.67 
  14  -3   0  134.56    6.85 
 -14   3   0  138.12    9.04 
 -14  -3   0  137.85    8.22 
 -15   3   0   19.18    3.84 
  15  -3   0   17.54    5.21 
 -15  -3   0   15.89    5.21 
 -15   3   0   16.72    4.11 
  15   3   0   21.10    4.38 
  15  -3   0   15.62    4.66 
  15   3   0   18.91    4.66 
  15  -3   0   20.83    4.38 
 -15  -3   0   15.89    5.76 
 -15   3   0   15.07    4.11 
 -15  -3   0   17.27    4.66 
  15  -3   0   16.99    4.38 
 -15   3   0   14.80    5.48 
 -15  -3   0   15.35    4.38 
 -16   3   0    0.55    3.56 
  16  -3   0    2.19    5.21 
 -16  -3   0    1.64    4.11 
 -16   3   0    0.27    3.84 
  16   3   0    0.82    4.11 
  16  -3   0    1.64    4.66 
  16   3   0    3.84    4.38 
  16  -3   0    1.37    3.84 
 -16  -3   0    1.37    4.38 
 -16   3   0    3.56    3.84 
  16  -3   0   -1.10    4.11 
 -16  -3   0    1.64    4.38 
 -16   3   0    4.11    6.30 
 -16  -3   0    0.82    4.11 
 -17   3   0   41.93    4.93 
  17  -3   0   46.86    5.76 
 -17  -3   0   40.29    6.03 
 -17   3   0   34.26    5.21 
  17   3   0   42.75    5.21 
  17  -3   0   38.37    4.66 
  17   3   0   41.93    5.48 
  17  -3   0   41.66    6.85 
 -17  -3   0   42.75    5.48 
 -17   3   0   32.89    4.93 
  17  -3   0   43.30    6.58 
 -17  -3   0   38.09    6.58 
 -17   3   0   40.56    6.58 
 -17  -3   0   35.35    5.76 
 -18   3   0    3.56    4.38 
  18  -3   0    6.85    4.11 
 -18  -3   0    6.58    4.66 
 -18   3   0    6.58    5.21 
  18   3   0   11.24    5.21 
  18  -3   0   10.41    4.38 
  18   3   0    4.38    6.30 
  18  -3   0    5.21    4.66 
 -18  -3   0   10.41    4.93 
 -18   3   0    5.48    4.38 
  18  -3   0    9.04    4.66 
 -18  -3   0    6.30    5.21 
 -18   3   0    9.04    4.93 
 -18  -3   0    9.59    6.03 
 -19   3   0   18.64    5.48 
  19  -3   0   22.75    4.93 
 -19  -3   0   18.64    6.03 
 -19   3   0   21.10    6.30 
  19   3   0   23.57    6.30 
  19  -3   0   25.49    6.03 
  19   3   0   27.41    5.48 
  19  -3   0   21.65    5.21 
 -19  -3   0   24.66    5.76 
 -19   3   0   18.09    6.30 
  19  -3   0   19.73    5.21 
 -19  -3   0   23.02    5.76 
 -19   3   0   23.84    5.76 
 -19  -3   0   23.57    5.48 
 -20   3   0   44.94    6.85 
  20  -3   0   50.43    6.58 
 -20  -3   0   43.03    6.03 
 -20   3   0   34.53    6.30 
  20   3   0   51.25    6.85 
  20  -3   0   42.75    5.48 
  20   3   0   44.40    6.03 
  20  -3   0   46.59    5.76 
 -20  -3   0   44.67    6.03 
 -20   3   0   40.83    5.76 
 -20  -3   0   44.67    6.30 
 -20   3   0   38.09    8.22 
 -20  -3   0   39.46    6.03 
 -21   3   0    7.67    5.21 
  21  -3   0    8.50    6.30 
 -21  -3   0    7.95    7.95 
 -21   3   0    3.01    6.58 
  21   3   0    8.77    5.21 
  21  -3   0    6.85    5.76 
  21   3   0    6.58    6.85 
  21  -3   0    7.13    6.03 
 -21  -3   0    9.87    5.76 
 -21   3   0    4.93    5.48 
 -21  -3   0    4.38    8.22 
 -21   3   0    6.85    6.03 
 -21  -3   0    7.95    5.76 
 -21   3   0    8.50    5.76 
 -22  -3   0   -2.19    5.76 
 -22   3   0   -0.27    7.95 
  22   3   0    1.10    5.21 
  22  -3   0    1.92    5.76 
  22   3   0   -0.55    5.76 
  22  -3   0    1.64    8.22 
 -22  -3   0   -3.56    5.76 
 -22   3   0    0.27    7.67 
 -22  -3   0   -0.82    7.13 
 -22   3   0    0.00    7.67 
 -22  -3   0    1.92    6.03 
 -22   3   0   -2.47    6.03 
   0   4   0  779.67   13.98 
   0  -4   0  788.17   14.80 
   0   4   0  786.25   14.52 
   0  -4   0  784.88   15.07 
   0  -4   0  808.17   16.17 
   0  -4   0  805.98   15.35 
   0   4   0  813.66   15.35 
  -1   4   0   94.00    5.21 
   1   4   0   94.55    4.66 
   1  -4   0   93.45    4.93 
  -1  -4   0   95.92    4.93 
   1  -4   0   90.44    4.93 
  -1  -4   0   97.84    4.93 
  -1   4   0  100.03    5.21 
   1   4   0   81.12    4.93 
  -1  -4   0   95.10    5.21 
   1  -4   0   92.35    5.76 
  -1  -4   0   98.93    5.48 
  -1   4   0   99.21    6.03 
   1  -4   0   94.00    5.76 
  -1  -4   0   95.92    5.21 
  -1   4   0  100.03    5.48 
   1   4   0   76.19    5.21 
  -2   4   0 1330.24   19.46 
   2   4   0 1337.09   19.73 
   2  -4   0 1396.29   20.01 
  -2  -4   0 1355.18   19.73 
   2  -4   0 1402.32   21.38 
  -2  -4   0 1350.25   20.55 
   2   4   0 1385.87   22.20 
  -2  -4   0 1329.14   20.55 
   2  -4   0 1377.38   22.20 
   2  -4   0 1403.14   21.38 
  -2  -4   0 1396.29   21.92 
   2   4   0 1332.71   20.55 
  -3   4   0   86.33    5.21 
   3   4   0   83.86    4.38 
   3  -4   0   85.50    5.21 
  -3  -4   0   80.57    4.66 
   3  -4   0   82.49    4.93 
  -3   4   0   88.24    5.21 
  -3  -4   0   82.76    4.93 
   3   4   0   96.74    5.76 
   3   4   0   89.07    5.21 
  -3  -4   0   83.04    4.93 
   3  -4   0   88.79    5.76 
  -3   4   0   79.20    5.21 
   3  -4   0   84.13    5.76 
  -3   4   0   84.68    5.21 
  -3  -4   0   84.13    4.93 
   3   4   0   82.49    5.21 
  -4   4   0   60.29    4.11 
   4   4   0   58.65    4.11 
   4  -4   0   61.94    4.11 
  -4  -4   0   58.10    4.11 
   4  -4   0   63.31    4.38 
  -4   4   0   62.21    4.11 
  -4  -4   0   58.92    4.93 
   4   4   0   60.84    4.11 
   4   4   0   63.31    5.21 
  -4  -4   0   58.65    4.38 
   4  -4   0   58.92    4.38 
  -4   4   0   60.02    4.93 
   4  -4   0   60.02    4.66 
  -4   4   0   58.65    4.38 
  -4  -4   0   55.91    4.93 
   4   4   0   58.92    4.38 
  -5   4   0  515.76   12.61 
   5   4   0  516.31   12.33 
   5  -4   0  527.00   12.61 
  -5  -4   0  511.65   12.33 
  -5   4   0  547.28   13.43 
  -5  -4   0  519.33   13.43 
   5   4   0  547.00   13.15 
  -5   4   0  529.47   12.88 
   5   4   0  543.17   13.70 
   5  -4   0  530.84   13.70 
  -5   4   0  520.70   13.43 
   5  -4   0  518.50   13.43 
  -5   4   0  549.74   13.70 
  -5  -4   0  493.02   12.88 
   5   4   0  539.33   13.43 
  -6   4   0  186.63    7.95 
   6   4   0  188.00    7.67 
   6  -4   0  178.41    7.67 
  -6  -4   0  180.33    7.67 
  -6   4   0  183.89    8.22 
  -6  -4   0  183.07    7.95 
   6   4   0  187.18    8.50 
  -6   4   0  183.34    7.95 
   6   4   0  195.67    8.50 
  -6  -4   0  186.08    8.22 
   6  -4   0  182.79    7.95 
  -6   4   0  193.48    8.50 
   6  -4   0  186.90    8.50 
  -6   4   0  195.95    8.50 
  -6  -4   0  184.71    8.50 
   6   4   0  190.19    8.50 
   7   4   0    0.00    2.74 
  -7   4   0   10.41    3.84 
   7  -4   0   11.24    3.84 
  -7  -4   0   13.43    3.29 
  -7   4   0   12.33    2.74 
  -7  -4   0   12.61    3.29 
   7   4   0   11.24    3.84 
  -7   4   0    9.04    2.19 
   7   4   0   12.33    4.11 
  -7  -4   0   11.51    3.01 
   7  -4   0   11.24    3.29 
  -7   4   0   11.78    3.01 
   7  -4   0   12.06    3.29 
  -7   4   0   11.24    3.29 
  -7  -4   0   13.15    3.01 
   7   4   0   10.69    3.01 
  -8   4   0   33.43    4.11 
   8  -4   0   36.72    3.84 
  -8   4   0   35.08    3.56 
  -8  -4   0   35.35    3.84 
   8   4   0   35.90    4.38 
  -8   4   0   34.53    3.56 
   8   4   0   33.43    4.66 
  -8  -4   0   30.69    3.84 
   8  -4   0   37.82    4.11 
  -8   4   0   34.80    4.66 
   8  -4   0   38.92    4.11 
  -8   4   0   34.53    4.66 
  -8  -4   0   37.27    4.11 
   8   4   0   35.90    4.66 
  -9   4   0   29.32    3.56 
   9  -4   0   33.71    3.84 
  -9   4   0   31.24    3.56 
  -9  -4   0   29.60    3.84 
   9   4   0   29.05    4.38 
  -9   4   0   29.87    3.56 
   9   4   0   29.60    5.21 
  -9  -4   0   31.79    4.11 
   9  -4   0   29.60    3.84 
  -9   4   0   31.52    3.84 
   9  -4   0   34.26    4.38 
  -9   4   0   29.87    5.21 
  -9  -4   0   31.79    3.84 
   9   4   0   31.52    4.38 
 -10   4   0   64.95    4.66 
  10  -4   0   66.87    4.93 
 -10   4   0   56.73    4.66 
 -10  -4   0   61.11    4.66 
  10   4   0   60.02    5.21 
 -10   4   0   60.02    4.11 
  10   4   0   63.03    4.93 
 -10  -4   0   57.28    4.93 
  10  -4   0   59.47    5.21 
 -10   4   0   59.74    4.66 
  10  -4   0   62.76    5.76 
 -10   4   0   60.02    6.03 
 -10  -4   0   55.91    4.66 
  10   4   0   68.24    5.76 
 -11   4   0    9.04    3.29 
  11  -4   0    9.59    3.29 
 -11  -4   0    6.58    3.56 
 -11   4   0    9.59    2.74 
  11   4   0    7.13    4.11 
  11   4   0    8.77    4.38 
 -11  -4   0    9.59    4.93 
  11  -4   0    9.59    4.66 
 -11   4   0    9.87    3.29 
  11  -4   0    7.67    4.93 
 -11   4   0    7.13    3.56 
 -11  -4   0    9.59    4.38 
  11   4   0    8.22    4.11 
 -12   4   0  135.93    6.85 
  12  -4   0  147.71    7.40 
 -12  -4   0  141.41    7.40 
 -12   4   0  138.94    7.13 
  12   4   0  129.35    7.40 
  12  -4   0  144.15    7.13 
  12   4   0  147.17    7.40 
 -12  -4   0  142.23    7.40 
  12  -4   0  145.25    7.95 
 -12   4   0  146.07    7.40 
  12  -4   0  143.05    8.22 
 -12   4   0  144.70    7.67 
 -12  -4   0  134.83    7.13 
  12   4   0  135.65    7.13 
 -13   4   0    2.74    3.29 
  13  -4   0    3.84    4.38 
 -13  -4   0    3.29    3.84 
 -13   4   0    5.76    3.56 
  13   4   0    6.30    4.93 
  13  -4   0    4.11    4.11 
  13   4   0    3.56    3.56 
 -13  -4   0    5.48    5.48 
  13  -4   0    4.66    4.93 
 -13   4   0    2.74    4.38 
 -13  -4   0    4.38    3.84 
  13  -4   0    4.93    4.66 
 -13   4   0    4.38    3.84 
 -13  -4   0    3.29    3.56 
 -14   4   0    0.55    3.56 
  14  -4   0    1.64    3.29 
 -14  -4   0   -0.82    4.93 
 -14   4   0    0.82    4.11 
  14   4   0   -0.55    3.84 
  14  -4   0    1.37    3.01 
  14   4   0    2.19    3.84 
 -14  -4   0    0.55    3.84 
  14  -4   0    1.37    3.56 
 -14   4   0   -1.10    3.56 
 -14  -4   0    1.37    4.93 
  14  -4   0    0.00    3.84 
 -14   4   0    0.27    5.21 
 -14  -4   0   -0.82    4.93 
 -15   4   0   42.48    4.66 
  15  -4   0   46.31    4.66 
 -15  -4   0   44.40    5.21 
 -15   4   0   52.07    5.21 
  15   4   0   47.41    4.93 
  15  -4   0   45.22    5.48 
  15   4   0   52.62    5.48 
 -15  -4   0   40.29    5.21 
  15  -4   0   44.94    4.93 
 -15   4   0   40.29    4.93 
 -15  -4   0   41.38    5.21 
  15  -4   0   45.49    5.21 
 -15   4   0   37.00    5.21 
 -15  -4   0   41.11    5.48 
 -16   4   0    1.10    3.84 
  16  -4   0    0.55    5.21 
 -16  -4   0   -0.55    4.38 
 -16   4   0    0.82    4.38 
  16   4   0    0.55    4.11 
  16  -4   0    0.82    4.93 
  16   4   0    0.00    4.38 
 -16  -4   0    0.27    6.30 
  16  -4   0    1.10    5.48 
 -16   4   0   -0.55    4.11 
 -16  -4   0    1.10    5.76 
  16  -4   0   -0.27    4.66 
 -16   4   0   -1.37    4.38 
 -16  -4   0    0.00    4.93 
 -17   4   0   18.36    4.38 
  17  -4   0   18.91    5.48 
 -17  -4   0   13.43    6.30 
 -17   4   0   15.89    5.76 
  17   4   0   14.80    4.66 
  17  -4   0   16.44    5.76 
  17   4   0   17.54    4.93 
  17  -4   0   17.81    4.66 
 -17  -4   0   15.35    5.76 
 -17   4   0   14.25    4.66 
  17  -4   0   16.17    4.93 
 -17  -4   0   15.07    5.21 
 -17   4   0   13.98    4.93 
 -17  -4   0   13.70    6.03 
 -18   4   0   12.88    4.66 
  18  -4   0   12.88    4.38 
 -18  -4   0   13.70    5.21 
 -18   4   0   10.96    6.58 
  18   4   0   15.89    4.93 
  18  -4   0   14.25    5.76 
  18   4   0   14.80    5.21 
  18  -4   0   10.14    5.76 
 -18  -4   0    9.32    5.21 
 -18   4   0   12.33    4.93 
  18  -4   0   15.89    4.93 
 -18  -4   0   11.51    5.21 
 -18   4   0   10.14    5.21 
 -18  -4   0   17.54    7.13 
 -19   4   0    6.30    4.66 
  19  -4   0    9.32    4.66 
 -19  -4   0    4.11    5.48 
 -19   4   0    7.13    5.21 
  19   4   0    8.22    5.21 
  19  -4   0    7.95    4.93 
  19   4   0   10.14    5.21 
  19  -4   0   11.24    5.21 
 -19  -4   0   10.41    5.48 
 -19   4   0    5.76    4.93 
  19  -4   0    6.30    6.30 
 -19  -4   0    5.21    6.30 
 -19   4   0    7.67    6.58 
 -19  -4   0    7.13    5.21 
 -20   4   0   26.58    5.48 
  20  -4   0   29.60    5.48 
 -20  -4   0   19.46    5.76 
 -20   4   0   22.75    6.03 
  20   4   0   27.13    6.85 
  20  -4   0   29.87    5.76 
  20   4   0   28.23    7.40 
  20  -4   0   27.13    5.76 
 -20  -4   0   27.13    6.03 
 -20   4   0   24.12    5.76 
  20  -4   0   26.58    5.76 
 -20  -4   0   24.66    6.03 
 -20   4   0   26.31    7.67 
 -20  -4   0   24.39    5.76 
 -21   4   0   -0.55    7.13 
  21  -4   0    0.00    5.48 
 -21  -4   0   -0.82    6.85 
 -21   4   0    0.00    6.30 
  21   4   0    0.00    6.58 
  21  -4   0    1.92    7.67 
  21   4   0    2.19    5.48 
  21  -4   0    3.84    6.85 
 -21  -4   0    3.01    5.76 
 -21   4   0   -1.10    6.58 
  21  -4   0    1.10    6.30 
 -21  -4   0    0.82    6.03 
 -21   4   0    2.47    6.03 
 -21  -4   0   -0.55    6.03 
   0   5   0    0.55    2.47 
   0  -5   0    0.55    2.19 
   0  -5   0   -0.82    3.01 
   0   5   0   -0.27    2.47 
   0  -5   0    0.00    2.47 
   0  -5   0    0.27    2.47 
   0  -5   0    0.27    2.74 
   0   5   0    0.00    2.47 
  -1   5   0   25.21    3.84 
   1   5   0   24.94    3.29 
   1  -5   0   26.31    3.29 
  -1  -5   0   28.50    3.29 
   1  -5   0   26.03    3.29 
  -1  -5   0   25.49    3.29 
  -1   5   0   26.58    3.29 
   1   5   0   22.75    3.29 
   1  -5   0   27.95    4.38 
  -1  -5   0   26.86    3.56 
   1  -5   0   24.66    3.56 
  -1  -5   0   26.58    3.56 
   1  -5   0   27.13    3.56 
  -1  -5   0   23.02    3.84 
  -1   5   0   27.41    4.11 
   1   5   0   30.15    3.84 
   2   5   0   -0.55    2.19 
  -2   5   0    0.27    2.19 
   2  -5   0    0.27    3.01 
  -2  -5   0    0.00    2.47 
   2  -5   0    0.00    2.74 
  -2  -5   0   -0.82    3.29 
  -2   5   0    0.00    2.47 
   2   5   0    0.00    2.19 
  -2  -5   0    0.00    2.74 
   2  -5   0    0.00    2.47 
  -2   5   0    0.27    3.01 
  -2  -5   0    0.00    2.74 
   2  -5   0    0.00    2.74 
  -2   5   0    0.00    2.74 
  -2  -5   0    0.82    2.74 
   2   5   0    1.64    3.29 
  -3   5   0    9.04    3.01 
   3   5   0    7.95    3.01 
   3  -5   0    9.32    2.74 
  -3  -5   0    8.22    2.74 
   3  -5   0   10.14    3.01 
  -3   5   0    8.50    2.47 
  -3  -5   0   10.14    3.84 
   3   5   0   10.69    3.29 
   3   5   0    7.67    3.84 
  -3  -5   0    7.67    4.11 
   3  -5   0    7.95    3.84 
  -3   5   0    9.59    3.01 
   3  -5   0    7.67    4.11 
  -3   5   0    9.32    3.56 
  -3  -5   0    9.87    4.11 
   3   5   0    8.22    3.01 
  -4   5   0   79.75    4.66 
   4   5   0   78.93    4.66 
   4  -5   0   86.33    5.48 
  -4  -5   0   76.46    4.93 
   4  -5   0   75.91    4.93 
  -4   5   0   84.68    4.93 
  -4  -5   0   81.94    4.93 
   4   5   0   87.97    5.48 
   4   5   0   87.42    6.30 
  -4  -5   0   79.47    4.93 
   4  -5   0   83.04    4.93 
  -4   5   0   85.23    5.48 
   4  -5   0   78.93    5.76 
  -4   5   0   83.04    6.03 
  -4  -5   0   76.19    5.76 
   4   5   0   85.23    5.21 
   5   5   0  141.14    6.58 
  -5   5   0  127.16    7.13 
   5  -5   0  157.30    7.67 
  -5  -5   0  149.36    6.85 
  -5   5   0  161.42    7.67 
  -5  -5   0  144.70    7.13 
   5   5   0  152.92    7.13 
  -5   5   0  148.81    7.13 
   5   5   0  155.93    7.40 
  -5  -5   0  141.41    7.13 
   5  -5   0  151.82    7.40 
  -5   5   0  149.08    7.13 
   5  -5   0  146.62    7.67 
  -5   5   0  154.02    8.22 
  -5  -5   0  148.81    7.40 
   5   5   0  151.55    7.95 
   6   5   0  336.81    9.32 
  -6   5   0  304.74    9.04 
   6  -5   0  349.41   10.14 
  -6  -5   0  322.01    9.04 
  -6   5   0  349.41   10.14 
  -6  -5   0  324.75    9.59 
   6   5   0  330.23    9.32 
  -6   5   0  328.59    9.32 
   6   5   0  318.45    9.59 
  -6  -5   0  304.74   10.14 
   6  -5   0  300.91    9.59 
  -6   5   0  316.25    9.59 
   6  -5   0  317.62    9.87 
  -6   5   0  305.29    9.87 
  -6  -5   0  322.01    9.59 
   6   5   0  313.79    9.59 
   7   5   0  223.63    7.67 
  -7   5   0  204.44    7.40 
   7  -5   0  217.60    7.67 
  -7  -5   0  217.05    7.40 
  -7   5   0  235.14    8.22 
  -7  -5   0  201.43    8.22 
   7   5   0  214.86    7.67 
  -7   5   0  212.66    7.40 
   7   5   0  216.23    7.95 
  -7  -5   0  205.81    8.77 
   7  -5   0  207.18    7.95 
  -7   5   0  214.03    7.95 
   7  -5   0  225.27    8.22 
  -7   5   0  209.37    7.95 
  -7  -5   0  215.95    8.50 
   7   5   0  216.77    7.95 
   8   5   0    1.10    2.19 
  -8   5   0    0.00    3.84 
   8  -5   0    0.27    2.74 
  -8  -5   0    0.55    2.19 
  -8   5   0    1.10    2.74 
  -8  -5   0    0.27    3.01 
   8   5   0    0.27    3.01 
  -8   5   0    1.37    2.47 
   8   5   0    1.10    3.01 
  -8  -5   0   -0.27    3.01 
   8  -5   0    1.10    3.01 
  -8   5   0    2.47    3.01 
   8  -5   0    0.82    3.29 
  -8   5   0    0.00    3.84 
  -8  -5   0    2.74    4.11 
   8   5   0    0.82    3.01 
  -9   5   0   10.41    3.29 
   9  -5   0   12.33    3.29 
  -9   5   0   12.06    3.56 
  -9  -5   0   12.61    3.56 
   9   5   0   11.24    3.56 
  -9   5   0   12.61    3.29 
   9   5   0   12.33    3.56 
  -9  -5   0    9.04    3.56 
   9  -5   0   12.88    3.56 
  -9   5   0   10.69    4.11 
   9  -5   0    9.32    4.93 
  -9   5   0   11.51    4.93 
  -9  -5   0    9.59    4.11 
   9   5   0   11.51    3.56 
 -10   5   0   13.15    3.56 
  10  -5   0   12.61    4.66 
 -10   5   0   14.25    3.01 
 -10  -5   0   12.88    5.21 
  10   5   0   11.24    3.56 
 -10   5   0   12.33    3.29 
  10   5   0   13.98    3.84 
 -10  -5   0   13.98    3.84 
  10  -5   0   15.62    3.84 
 -10   5   0   14.52    4.93 
  10  -5   0   14.25    3.84 
 -10   5   0   12.33    5.21 
 -10  -5   0   14.52    5.21 
  10   5   0   11.78    3.84 
 -11   5   0   20.28    3.84 
  11  -5   0   20.01    3.84 
 -11   5   0   19.46    3.84 
 -11  -5   0   18.91    5.48 
 -11   5   0   19.73    3.56 
  11   5   0   21.10    4.11 
  11   5   0   17.54    5.21 
 -11  -5   0   21.38    5.48 
  11  -5   0   20.28    5.21 
 -11   5   0   20.55    5.21 
  11  -5   0   18.36    4.11 
 -11   5   0   18.64    4.93 
 -11  -5   0   18.36    4.11 
  11   5   0   20.83    4.38 
 -12   5   0   19.18    3.84 
  12  -5   0   23.57    4.93 
 -12   5   0   21.10    3.56 
 -12  -5   0   17.27    5.76 
 -12   5   0   19.73    4.11 
  12   5   0   22.47    4.11 
  12   5   0   19.73    4.11 
 -12  -5   0   19.18    4.38 
  12  -5   0   20.01    4.11 
 -12   5   0   17.27    4.93 
  12  -5   0   18.36    4.11 
 -12   5   0   20.01    4.38 
 -12  -5   0   20.28    4.66 
  12   5   0   21.38    4.38 
 -13   5   0   21.10    5.48 
  13  -5   0   24.39    4.11 
 -13   5   0   23.57    4.93 
 -13  -5   0   23.84    4.66 
 -13   5   0   20.55    4.38 
  13   5   0   20.55    4.11 
  13   5   0   24.66    4.66 
 -13  -5   0   22.75    6.03 
  13  -5   0   19.73    4.38 
 -13   5   0   19.46    4.11 
  13  -5   0   23.29    4.38 
 -13   5   0   20.01    6.03 
 -13  -5   0   21.38    4.38 
  13   5   0   16.72    5.21 
 -14   5   0   42.48    5.76 
  14  -5   0   52.07    6.03 
 -14   5   0   42.75    5.48 
 -14  -5   0   39.46    5.21 
 -14   5   0   44.67    4.66 
  14   5   0   45.49    4.93 
  14   5   0   36.45    6.30 
 -14  -5   0   38.92    5.21 
  14  -5   0   43.57    5.76 
 -14   5   0   37.00    4.66 
  14  -5   0   41.11    6.30 
 -14   5   0   38.09    5.21 
 -14  -5   0   44.12    6.30 
  14   5   0   36.45    4.93 
 -15   5   0   60.57    5.76 
  15  -5   0   69.61    6.03 
 -15   5   0   59.47    6.03 
 -15  -5   0   63.85    6.30 
 -15   5   0   64.95    6.85 
  15   5   0   62.76    6.03 
  15   5   0   64.13    6.30 
 -15  -5   0   56.73    5.76 
  15  -5   0   53.44    5.76 
 -15   5   0   62.76    6.03 
 -15  -5   0   56.18    5.76 
  15  -5   0   64.68    6.30 
 -15   5   0   59.19    5.76 
 -15  -5   0   61.94    7.13 
 -16   5   0    1.10    4.11 
  16  -5   0    4.11    4.11 
 -16   5   0    1.92    4.11 
 -16  -5   0    1.37    5.48 
 -16   5   0    1.64    4.11 
  16   5   0    3.84    5.76 
  16   5   0    2.74    4.66 
 -16  -5   0   -1.64    6.03 
  16  -5   0    3.29    4.38 
 -16   5   0    3.29    4.93 
 -16  -5   0    0.00    4.38 
  16  -5   0    1.37    4.38 
 -16   5   0    1.92    6.58 
 -16  -5   0    3.01    4.38 
 -17   5   0    0.55    4.38 
  17  -5   0    1.92    5.48 
 -17   5   0    0.00    4.38 
 -17  -5   0   -0.55    4.66 
 -17   5   0    0.55    4.66 
  17   5   0    0.82    5.76 
  17   5   0   -0.27    4.66 
 -17  -5   0    2.19    4.93 
  17  -5   0    0.82    4.66 
 -17   5   0    1.64    6.30 
 -17  -5   0    2.74    4.93 
  17  -5   0   -1.10    5.21 
 -17   5   0   -0.27    6.85 
 -17  -5   0    2.19    4.66 
 -18   5   0    8.22    4.93 
  18  -5   0   12.88    5.76 
 -18   5   0    9.04    5.76 
 -18  -5   0   13.43    5.48 
 -18   5   0    8.77    6.03 
  18   5   0   13.15    5.21 
  18   5   0    7.95    5.48 
 -18  -5   0   10.41    5.48 
  18  -5   0   10.96    5.21 
 -18   5   0    7.95    4.93 
 -18  -5   0    8.22    5.48 
  18  -5   0   12.06    5.21 
 -18   5   0   10.14    7.40 
 -18  -5   0   10.96    5.48 
 -19   5   0    6.58    5.48 
  19  -5   0    8.22    4.93 
 -19   5   0    8.22    6.30 
 -19  -5   0    6.58    7.13 
 -19   5   0    6.85    7.13 
  19   5   0   10.69    5.21 
  19   5   0    4.38    6.85 
  19  -5   0    6.03    5.21 
 -19  -5   0    6.30    5.48 
 -19   5   0    6.03    5.21 
  19  -5   0    4.11    5.76 
 -19  -5   0    6.58    7.40 
 -19   5   0    8.50    7.67 
 -19  -5   0    3.84    6.30 
 -20   5   0    1.64    5.76 
  20  -5   0    0.00    4.93 
 -20  -5   0   -0.27    5.76 
  20   5   0    1.92    5.21 
  20   5   0    0.82    5.48 
  20  -5   0   -0.27    5.48 
 -20  -5   0   -0.27    7.13 
 -20   5   0   -1.64    6.85 
  20  -5   0    4.11    5.48 
 -20  -5   0   -1.37    5.76 
 -20   5   0    1.92    7.40 
 -20  -5   0   -4.11    6.85 
   0   6   0  433.82   10.96 
   0  -6   0  438.48   10.96 
   0  -6   0  416.01   11.24 
   0   6   0  453.28   11.51 
   0  -6   0  414.09   11.24 
   0  -6   0  441.77   11.51 
   0  -6   0  428.61   11.51 
   0   6   0  425.33   11.24 
   1   6   0    6.03    3.29 
  -1   6   0    3.84    2.47 
   1  -6   0    4.93    2.74 
  -1  -6   0    4.38    2.47 
   1  -6   0    4.93    2.47 
  -1  -6   0    3.84    2.74 
  -1   6   0    4.38    2.19 
   1   6   0    5.76    2.47 
   1  -6   0    4.66    3.01 
  -1  -6   0    4.93    3.56 
   1  -6   0    4.66    3.84 
  -1  -6   0    5.21    3.56 
   1  -6   0    3.01    4.38 
  -1  -6   0    5.48    3.01 
  -1   6   0    4.93    3.01 
   1   6   0    4.66    4.11 
  -2   6   0   88.52    4.93 
   2   6   0   88.52    4.66 
   2  -6   0   86.87    5.21 
  -2  -6   0   83.31    5.21 
   2  -6   0   84.13    4.93 
  -2  -6   0   88.79    5.21 
  -2   6   0   86.33    4.93 
   2   6   0   96.47    5.48 
  -2  -6   0   83.31    5.21 
   2  -6   0   89.89    5.48 
  -2  -6   0   92.08    5.48 
   2  -6   0   90.44    5.48 
  -2  -6   0   84.13    5.21 
  -2   6   0   83.59    5.21 
   2   6   0   87.97    5.21 
   3   6   0   10.96    2.47 
  -3   6   0   10.96    3.01 
   3  -6   0   12.88    3.01 
  -3  -6   0   12.88    2.74 
   3  -6   0   10.41    3.56 
  -3  -6   0   10.69    3.29 
  -3   6   0   10.96    3.29 
   3   6   0   10.96    3.84 
  -3  -6   0   10.96    3.29 
   3  -6   0   10.14    3.29 
  -3   6   0    9.87    4.38 
  -3  -6   0   10.41    3.29 
   3  -6   0   10.41    3.84 
  -3  -6   0   10.96    3.29 
  -3   6   0   11.78    3.29 
   3   6   0    9.87    3.29 
  -4   6   0   41.66    3.84 
   4   6   0   41.38    4.11 
   4  -6   0   43.30    4.11 
  -4  -6   0   41.11    4.38 
   4  -6   0   39.19    3.84 
  -4  -6   0   39.46    4.66 
  -4   6   0   42.75    3.84 
   4   6   0   42.20    4.93 
   4   6   0   38.64    4.11 
  -4  -6   0   35.63    4.11 
   4  -6   0   44.94    4.38 
  -4   6   0   42.75    4.11 
   4  -6   0   42.48    4.38 
  -4   6   0   46.31    4.38 
  -4  -6   0   36.72    4.11 
   4   6   0   40.01    4.38 
   5   6   0   98.38    5.48 
  -5   6   0   99.21    5.21 
   5  -6   0  106.33    5.48 
  -5  -6   0   92.63    4.93 
   5  -6   0  105.51    5.48 
  -5   6   0  102.49    5.48 
  -5  -6   0  100.58    5.48 
   5   6   0  108.80    6.30 
   5   6   0  105.24    6.03 
  -5  -6   0   99.21    6.58 
   5  -6   0  102.22    5.76 
  -5   6   0  106.88    5.76 
   5  -6   0  104.69    6.03 
  -5   6   0  111.26    6.03 
  -5  -6   0   98.66    6.03 
   5   6   0  101.95    6.58 
   6   6   0  159.50    7.13 
  -6   6   0  149.36    7.13 
   6  -6   0  157.58    7.67 
  -6  -6   0  150.18    7.13 
  -6   6   0  152.37    7.40 
  -6  -6   0  150.45    7.40 
   6   6   0  163.33    8.22 
  -6   6   0  158.68    7.40 
   6   6   0  166.90    7.95 
  -6  -6   0  144.15    8.22 
   6  -6   0  160.05    8.50 
  -6   6   0  150.73    7.95 
   6  -6   0  160.59    8.50 
  -6   6   0  158.13    7.95 
  -6  -6   0  152.65    7.67 
   6   6   0  150.45    7.95 
   7   6   0    3.56    2.47 
  -7   6   0    3.01    3.01 
   7  -6   0    4.11    3.01 
  -7  -6   0    4.66    3.01 
  -7   6   0    4.38    3.01 
  -7  -6   0    2.74    4.66 
   7   6   0    4.93    4.38 
  -7   6   0    3.29    2.47 
   7   6   0    2.47    3.29 
  -7  -6   0    3.29    3.56 
   7  -6   0    4.11    3.84 
  -7   6   0    3.29    3.84 
   7  -6   0    2.47    3.56 
  -7   6   0    3.84    3.56 
  -7  -6   0    4.38    4.38 
   7   6   0    3.29    3.29 
   8   6   0   55.08    4.38 
  -8   6   0   45.77    4.38 
   8  -6   0   46.31    4.38 
  -8  -6   0   49.88    4.11 
  -8   6   0   52.34    4.66 
  -8  -6   0   48.51    4.66 
   8   6   0   46.59    4.38 
  -8   6   0   52.34    4.38 
   8   6   0   48.51    5.76 
  -8  -6   0   43.85    4.66 
   8  -6   0   45.22    4.66 
  -8   6   0   42.48    4.38 
   8  -6   0   44.67    5.21 
  -8   6   0   48.51    4.93 
  -8  -6   0   40.01    5.48 
   8   6   0   49.60    4.93 
   9   6   0    4.93    2.74 
  -9   6   0   13.43    4.93 
   9  -6   0   11.51    3.56 
  -9  -6   0   11.24    3.01 
  -9   6   0   13.43    3.84 
  -9  -6   0   11.24    3.84 
   9   6   0   10.96    3.56 
  -9   6   0   12.88    3.29 
   9   6   0    9.87    3.84 
  -9  -6   0   12.61    3.84 
   9  -6   0   14.80    5.21 
  -9   6   0   10.14    4.11 
   9  -6   0   13.15    5.48 
  -9   6   0   13.15    4.11 
  -9  -6   0   12.33    5.48 
   9   6   0   10.69    4.66 
 -10   6   0    0.82    3.29 
  10  -6   0   -0.82    4.66 
 -10   6   0    0.00    3.56 
 -10  -6   0    0.27    4.66 
  10   6   0    2.19    3.56 
 -10   6   0    0.00    3.01 
  10   6   0    2.19    3.56 
 -10  -6   0   -0.82    3.56 
  10  -6   0    0.00    3.56 
 -10   6   0    1.37    4.93 
  10  -6   0    0.55    4.93 
 -10   6   0   -1.37    3.56 
 -10  -6   0    0.00    3.56 
  10   6   0   -0.82    4.66 
 -11   6   0  139.22    8.22 
  11  -6   0  146.62    8.22 
 -11   6   0  164.43    9.32 
 -11  -6   0  138.12    8.22 
 -11   6   0  145.25    8.22 
  11   6   0  143.05    8.22 
  11   6   0  143.05    8.50 
 -11  -6   0  133.46    6.85 
  11  -6   0  139.49    8.22 
 -11   6   0  127.71    7.13 
  11  -6   0  132.91    6.85 
 -11   6   0  139.22    8.50 
 -11  -6   0  132.09    6.58 
  11   6   0  131.54    6.85 
 -12   6   0   17.27    4.11 
  12  -6   0   14.52    3.84 
 -12  -6   0   14.25    4.38 
 -12   6   0   15.07    3.84 
  12   6   0   13.43    4.11 
  12   6   0   15.62    4.38 
 -12  -6   0   17.27    6.03 
  12  -6   0   14.80    4.66 
 -12   6   0   16.72    5.48 
  12  -6   0   13.70    5.48 
 -12   6   0   16.44    5.48 
 -12  -6   0   13.15    4.93 
  12   6   0   14.52    4.66 
 -13   6   0  119.49    8.50 
  13  -6   0  127.98    8.22 
 -13  -6   0  119.76    7.95 
 -13   6   0  127.98    7.67 
  13   6   0  125.52    7.67 
  13   6   0  126.34    8.22 
 -13  -6   0  110.72    7.67 
  13  -6   0  113.73    8.22 
 -13   6   0  112.91    7.67 
  13  -6   0  116.20    8.77 
 -13   6   0  120.03    7.95 
 -13  -6   0  119.76    7.95 
  13   6   0  119.49    8.22 
 -14   6   0    7.13    4.66 
  14  -6   0    8.77    4.11 
 -14  -6   0    7.95    5.48 
 -14   6   0   11.51    4.11 
  14   6   0   12.33    5.48 
  14   6   0   11.51    4.38 
 -14  -6   0   10.14    4.66 
  14  -6   0   10.41    4.93 
 -14   6   0   10.41    4.38 
  14  -6   0    9.04    4.66 
 -14   6   0    8.50    4.66 
 -14  -6   0    8.50    5.76 
  14   6   0   10.96    4.38 
 -15   6   0   32.61    4.93 
  15  -6   0   34.53    4.93 
 -15  -6   0   32.06    7.13 
 -15   6   0   34.53    5.76 
  15   6   0   32.34    6.30 
  15   6   0   32.89    5.21 
 -15  -6   0   33.43    5.48 
  15  -6   0   30.97    4.93 
 -15   6   0   22.20    5.48 
  15  -6   0   32.06    5.21 
 -15   6   0   28.23    5.21 
 -15  -6   0   32.06    5.21 
  15   6   0   29.32    5.21 
 -16   6   0    0.27    4.38 
  16  -6   0    1.37    4.11 
 -16  -6   0   -0.27    4.93 
 -16   6   0    0.27    4.38 
  16   6   0   -0.55    4.38 
  16   6   0    2.19    4.66 
 -16  -6   0    1.37    4.93 
  16  -6   0    1.64    4.66 
 -16   6   0    1.92    4.66 
 -16  -6   0    1.64    6.03 
  16  -6   0    3.01    4.93 
 -16   6   0    0.82    4.66 
 -16  -6   0   -0.55    4.66 
 -17   6   0    1.92    4.66 
  17  -6   0    1.10    4.38 
 -17  -6   0   -0.27    5.21 
 -17   6   0    3.84    6.03 
  17   6   0    4.11    4.93 
  17   6   0   -1.37    6.30 
 -17  -6   0    0.00    4.93 
  17  -6   0    4.38    6.03 
 -17   6   0    3.01    4.93 
 -17  -6   0    1.10    4.93 
  17  -6   0   -0.27    5.48 
 -17   6   0    0.00    6.58 
 -17  -6   0    1.10    4.93 
 -18   6   0   24.66    5.21 
  18  -6   0   31.24    5.21 
 -18  -6   0   29.32    6.03 
  18   6   0   33.16    5.48 
  18   6   0   31.79    6.85 
 -18  -6   0   26.03    7.13 
  18  -6   0   26.31    6.30 
 -18   6   0   25.21    5.76 
 -18  -6   0   22.47    5.76 
  18  -6   0   27.68    5.76 
 -18   6   0   27.95    7.95 
 -18  -6   0   26.31    5.76 
 -19   6   0    1.64    4.93 
  19  -6   0    0.55    6.03 
 -19  -6   0    2.74    5.76 
  19   6   0    0.82    5.21 
  19   6   0   -3.29    5.21 
 -19  -6   0   -0.55    5.48 
  19  -6   0    0.82    5.76 
 -19   6   0    1.37    5.76 
 -19  -6   0    0.27    5.76 
  19  -6   0    0.00    6.58 
 -19   6   0    1.64    7.95 
 -19  -6   0    0.27    5.21 
 -20   6   0   18.91    5.48 
  20  -6   0   18.36    5.48 
 -20  -6   0   17.54    6.03 
  20   6   0   17.81    7.13 
  20   6   0   16.44    5.76 
  20  -6   0   18.36    7.67 
 -20  -6   0   17.54    6.30 
 -20   6   0   19.73    6.85 
 -20  -6   0   22.20    6.58 
  20  -6   0   17.27    6.30 
 -20   6   0   16.17    8.77 
 -20  -6   0   15.35    6.03 
   0   7   0    0.00    2.74 
   0  -7   0    0.00    3.56 
   0  -7   0    0.00    2.74 
   0   7   0   -0.27    2.47 
   0  -7   0    0.27    4.38 
   0  -7   0    0.82    3.29 
   0  -7   0   -1.37    3.29 
   0   7   0    0.00    3.01 
  -1   7   0    1.64    2.74 
   1   7   0    1.64    2.74 
   1  -7   0    0.82    3.84 
  -1  -7   0    1.64    3.56 
   1  -7   0    2.19    3.84 
  -1  -7   0    2.19    3.01 
  -1   7   0    1.10    2.47 
   1   7   0    1.92    3.01 
   1  -7   0    0.27    4.38 
  -1  -7   0    0.82    4.38 
   1  -7   0    3.01    3.29 
  -1  -7   0    1.64    3.29 
   1  -7   0    1.10    3.29 
  -1  -7   0    0.00    3.29 
  -1   7   0    0.82    4.66 
   1   7   0    0.55    3.29 
  -2   7   0    2.74    3.01 
   2   7   0    1.64    2.74 
   2  -7   0    4.11    3.01 
  -2  -7   0    2.47    3.56 
   2  -7   0    3.01    3.56 
  -2  -7   0    2.47    3.01 
  -2   7   0    2.47    2.47 
   2   7   0    2.47    3.01 
   2  -7   0    1.64    4.11 
  -2  -7   0    2.74    4.66 
   2  -7   0    2.47    4.66 
  -2  -7   0    3.29    3.56 
   2  -7   0    4.38    3.56 
  -2  -7   0    4.93    4.38 
  -2   7   0    0.55    4.11 
   2   7   0    1.37    3.29 
   3   7   0    6.03    3.84 
  -3   7   0    6.85    3.01 
   3  -7   0    6.03    4.38 
  -3  -7   0    7.13    2.74 
   3  -7   0    7.67    3.84 
  -3  -7   0    7.13    3.29 
  -3   7   0    6.03    3.01 
   3   7   0    7.95    3.01 
  -3  -7   0    5.76    3.56 
   3  -7   0    6.30    3.56 
  -3  -7   0    6.85    3.56 
   3  -7   0    6.30    4.66 
  -3  -7   0    7.67    3.84 
  -3   7   0    8.50    3.56 
   3   7   0    7.40    3.56 
  -4   7   0  148.54    7.95 
   4   7   0  148.54    7.13 
   4  -7   0  156.76    7.40 
  -4  -7   0  152.37    7.13 
   4  -7   0  143.05    7.40 
  -4  -7   0  154.29    8.50 
  -4   7   0  151.00    7.13 
   4   7   0  151.28    7.40 
  -4  -7   0  142.23    7.40 
   4  -7   0  160.05    8.77 
  -4   7   0  155.39    7.95 
  -4  -7   0  147.71    7.67 
   4  -7   0  143.88    8.50 
  -4   7   0  147.17    7.67 
  -4  -7   0  151.28    7.67 
   4   7   0  145.79    7.67 
   5   7   0    1.37    2.47 
  -5   7   0    1.10    3.01 
   5  -7   0    0.00    3.01 
  -5  -7   0    0.82    3.29 
   5  -7   0    0.55    3.29 
  -5  -7   0    0.00    4.11 
  -5   7   0    1.92    3.01 
   5   7   0    0.00    3.01 
  -5  -7   0   -1.10    3.29 
   5  -7   0    1.10    3.29 
  -5   7   0    0.55    3.29 
  -5  -7   0    0.27    3.56 
   5  -7   0   -0.55    3.56 
  -5   7   0    0.82    3.56 
  -5  -7   0    1.64    3.56 
   5   7   0    0.82    3.56 
   6   7   0  193.21    8.22 
  -6   7   0  172.10    8.22 
   6  -7   0  197.32    8.50 
  -6  -7   0  181.97    7.67 
  -6  -7   0  173.47    8.77 
  -6   7   0  204.44    8.77 
   6   7   0  189.64    8.22 
  -6   7   0  195.95    8.50 
   6   7   0  197.32    9.04 
  -6  -7   0  187.45    8.77 
   6  -7   0  182.24    9.04 
  -6   7   0  192.93    8.50 
   6  -7   0  181.70    8.77 
  -6   7   0  182.79    8.50 
  -6  -7   0  171.83    8.50 
   6   7   0  193.48    8.77 
   7   7   0  135.38    6.85 
  -7   7   0  126.89    6.85 
   7  -7   0  133.46    7.13 
  -7  -7   0  122.77    6.58 
  -7  -7   0  125.52    8.22 
  -7   7   0  147.44    7.40 
   7   7   0  135.65    7.13 
  -7   7   0  147.17    7.40 
   7   7   0  145.25    7.95 
  -7  -7   0  113.46    7.67 
   7  -7   0  126.34    7.13 
  -7   7   0  138.12    7.40 
   7  -7   0  128.53    7.67 
  -7   7   0  137.03    7.67 
  -7  -7   0  129.90    7.40 
   7   7   0  131.27    7.40 
   8   7   0    7.13    3.56 
  -8   7   0    5.48    4.38 
   8  -7   0    4.38    3.56 
  -8  -7   0    6.03    3.56 
  -8   7   0    6.85    3.29 
  -8  -7   0    6.85    4.11 
   8   7   0    7.13    4.38 
  -8   7   0    7.13    3.29 
   8   7   0    6.58    3.84 
  -8  -7   0    6.03    3.84 
   8  -7   0    5.48    5.21 
  -8   7   0    7.95    5.21 
   8  -7   0    6.85    4.11 
  -8   7   0    5.76    4.11 
  -8  -7   0    4.66    3.84 
   8   7   0    6.30    4.11 
   9   7   0    3.56    3.29 
  -9   7   0    6.85    3.84 
   9  -7   0    3.84    3.56 
  -9  -7   0    4.38    3.01 
  -9   7   0    3.56    3.56 
  -9  -7   0    4.66    5.76 
   9   7   0    2.19    5.21 
  -9   7   0    3.84    3.29 
   9   7   0    3.56    3.84 
  -9  -7   0    2.47    3.84 
   9  -7   0    3.84    3.84 
  -9   7   0    3.84    3.56 
   9  -7   0    5.76    4.11 
  -9   7   0    2.74    4.11 
  -9  -7   0    3.56    3.84 
   9   7   0    2.47    5.21 
 -10   7   0   37.27    5.48 
  10  -7   0   43.30    5.48 
 -10  -7   0   44.12    6.03 
 -10   7   0   46.86    4.93 
 -10  -7   0   42.48    5.21 
  10   7   0   39.46    4.66 
 -10   7   0   43.30    4.38 
  10   7   0   38.92    5.76 
 -10  -7   0   37.00    6.30 
  10  -7   0   44.40    4.93 
 -10   7   0   37.54    4.66 
  10  -7   0   40.56    5.21 
 -10   7   0   36.17    4.93 
 -10  -7   0   38.92    5.48 
  10   7   0   37.00    4.93 
 -11   7   0   13.43    4.11 
  11  -7   0   15.89    4.11 
 -11   7   0   14.52    4.38 
 -11  -7   0   10.41    4.38 
 -11   7   0   11.24    4.11 
  11   7   0   12.61    4.11 
  11   7   0   12.88    4.38 
 -11  -7   0   14.52    4.66 
  11  -7   0   15.62    5.48 
 -11   7   0   13.70    4.11 
  11  -7   0   14.52    4.66 
 -11   7   0   12.61    4.66 
 -11  -7   0   12.33    4.38 
  11   7   0   13.98    4.38 
 -12   7   0    0.82    3.84 
  12  -7   0   -1.10    3.84 
 -12  -7   0   -0.27    4.38 
 -12   7   0    0.00    4.11 
  12   7   0   -0.82    4.11 
  12   7   0   -0.27    4.11 
 -12  -7   0   -0.82    4.38 
  12  -7   0    0.00    5.76 
 -12   7   0   -0.55    3.84 
  12  -7   0    2.47    4.38 
 -12   7   0    1.37    5.76 
 -12  -7   0    0.00    4.11 
  12   7   0    1.37    4.93 
 -13   7   0    3.84    4.11 
  13  -7   0    6.03    5.76 
 -13   7   0    3.84    4.93 
 -13  -7   0    3.01    4.66 
 -13   7   0    4.38    4.38 
  13   7   0    1.64    4.11 
  13   7   0    1.37    4.38 
 -13  -7   0    2.47    4.38 
  13  -7   0    3.56    6.03 
 -13   7   0    3.29    4.38 
  13  -7   0    4.38    4.66 
 -13   7   0    6.03    4.66 
 -13  -7   0    5.21    6.30 
  13   7   0    5.21    4.93 
 -14   7   0    3.56    5.76 
  14  -7   0    4.11    4.11 
 -14   7   0    6.58    5.21 
 -14  -7   0    3.84    4.66 
 -14   7   0    4.38    4.93 
  14   7   0    4.66    6.03 
  14   7   0    4.38    5.76 
 -14  -7   0    3.84    4.66 
  14  -7   0    4.93    6.30 
 -14   7   0    4.11    4.93 
  14  -7   0    9.04    6.85 
 -14   7   0    4.38    4.93 
 -14  -7   0    4.11    4.66 
  14   7   0    2.74    4.66 
 -15   7   0   17.54    4.66 
  15  -7   0   13.98    5.76 
 -15  -7   0   11.24    5.21 
  15   7   0   13.70    4.93 
  15   7   0   18.09    5.21 
 -15  -7   0   12.33    7.13 
  15  -7   0   12.88    5.76 
 -15   7   0    9.87    4.93 
  15  -7   0   13.70    5.48 
 -15   7   0   11.24    5.21 
 -15  -7   0   12.06    4.93 
  15   7   0   12.61    4.93 
 -16   7   0   34.80    5.48 
  16  -7   0   44.67    5.48 
 -16  -7   0   39.19    6.03 
  16   7   0   46.86    5.76 
  16   7   0   40.56    5.76 
 -16  -7   0   38.09    5.76 
  16  -7   0   36.72    5.76 
 -16   7   0   34.80    6.03 
  16  -7   0   40.01    6.03 
 -16   7   0   33.43    6.58 
 -16  -7   0   31.79    6.85 
  16   7   0   33.43    5.48 
 -17   7   0   54.26    5.76 
  17  -7   0   57.82    6.85 
 -17  -7   0   57.82    6.85 
  17   7   0   60.02    6.03 
  17   7   0   58.65    6.30 
 -17  -7   0   49.60    6.30 
  17  -7   0   58.92    6.30 
 -17   7   0   51.52    7.13 
 -17  -7   0   49.88    6.30 
  17  -7   0   57.28    8.50 
 -17   7   0   61.94    7.95 
 -17  -7   0   45.22    7.67 
 -18   7   0    2.74    4.93 
  18  -7   0    4.66    4.93 
 -18  -7   0    5.76    6.85 
  18   7   0    4.38    5.21 
  18   7   0    3.29    5.48 
 -18  -7   0    2.74    5.48 
  18  -7   0    4.93    6.85 
 -18   7   0    5.21    5.76 
 -18  -7   0    3.01    5.48 
  18  -7   0    3.01    5.48 
 -18   7   0    4.93    5.76 
 -18  -7   0    1.92    6.03 
 -19   7   0   72.90    6.58 
  19  -7   0  107.98    6.85 
 -19  -7   0   75.64    7.13 
  19   7   0   79.20    8.22 
  19   7   0   96.47    7.13 
 -19  -7   0   82.76    8.77 
  19  -7   0   80.02    7.40 
 -19   7   0   79.75    7.40 
 -19  -7   0   81.67    7.13 
  19  -7   0   83.86    7.40 
 -19   7   0   85.50    7.67 
 -19  -7   0   74.27    7.67 
   0   8   0   16.44    3.56 
   0  -8   0   16.72    4.11 
   0  -8   0   20.55    3.84 
   0   8   0   19.18    3.56 
   0  -8   0   17.54    4.66 
   0  -8   0   20.83    4.11 
   0  -8   0   18.64    4.38 
   0   8   0   16.99    5.48 
   1   8   0    0.00    3.29 
  -1   8   0   -0.55    3.01 
   1  -8   0    1.37    3.29 
  -1  -8   0    0.00    4.11 
   1  -8   0   -1.10    3.01 
  -1  -8   0   -0.27    3.01 
  -1   8   0    0.27    3.01 
   1   8   0   -0.55    2.74 
   1  -8   0    0.00    3.56 
  -1  -8   0   -0.27    3.29 
   1  -8   0    0.27    3.56 
  -1  -8   0   -0.55    3.56 
   1  -8   0   -1.10    3.84 
  -1  -8   0    3.01    5.48 
  -1   8   0   -0.27    3.56 
   1   8   0    0.00    3.56 
   2   8   0   23.02    4.66 
  -2   8   0   21.10    3.56 
   2  -8   0   20.83    3.84 
  -2  -8   0   19.73    4.38 
   2  -8   0   22.20    4.66 
  -2  -8   0   21.92    4.11 
  -2   8   0   21.38    4.38 
   2   8   0   21.92    4.38 
   2  -8   0   21.10    4.11 
  -2  -8   0   19.73    4.11 
   2  -8   0   23.29    4.38 
  -2  -8   0   19.73    4.93 
   2  -8   0   23.57    4.38 
  -2  -8   0   20.83    4.38 
  -2   8   0   25.49    4.38 
   2   8   0   25.76    4.38 
  -3   8   0  105.51    6.58 
   3   8   0  111.26    6.30 
   3  -8   0  113.73    6.58 
  -3  -8   0  110.99    6.30 
   3  -8   0  105.51    6.58 
  -3  -8   0  109.89    6.85 
  -3   8   0  110.17    6.58 
   3   8   0  114.55    7.13 
   3  -8   0  106.33    7.40 
  -3  -8   0  110.17    6.85 
   3  -8   0  111.81    7.40 
  -3  -8   0  104.69    6.85 
   3  -8   0  113.73    7.13 
  -3  -8   0  106.06    7.67 
  -3   8   0  111.81    7.13 
   3   8   0  117.29    7.95 
   4   8   0  512.75   17.54 
  -4   8   0  479.31   16.72 
   4  -8   0  533.30   18.36 
  -4  -8   0  471.37   16.17 
   4  -8   0  491.10   17.27 
  -4  -8   0  478.77   16.99 
  -4   8   0  476.03   16.17 
   4   8   0  498.77   16.99 
   4  -8   0  473.83   16.99 
  -4  -8   0  449.17   16.72 
   4  -8   0  519.33   18.64 
  -4  -8   0  485.34   17.27 
   4  -8   0  489.73   17.81 
  -4  -8   0  503.16   17.54 
  -4   8   0  480.68   16.99 
   4   8   0  488.36   16.99 
   5   8   0   17.81    4.38 
  -5   8   0   18.64    3.84 
   5  -8   0   17.54    3.84 
  -5  -8   0   18.09    3.84 
   5  -8   0   20.55    3.56 
  -5  -8   0   20.01    5.48 
  -5   8   0   21.65    3.29 
   5   8   0   21.38    3.84 
  -5  -8   0   16.99    4.11 
   5  -8   0   19.18    4.11 
  -5  -8   0   20.01    4.38 
  -5   8   0   19.73    5.21 
   5  -8   0   17.54    6.03 
  -5  -8   0   17.54    4.38 
  -5   8   0   20.83    4.38 
   5   8   0   15.62    4.11 
   6   8   0   18.91    4.66 
  -6   8   0   16.99    3.84 
   6  -8   0   20.28    3.84 
  -6  -8   0   17.54    3.29 
  -6  -8   0   15.07    5.48 
  -6   8   0   18.36    3.56 
   6   8   0   18.91    4.66 
  -6   8   0   19.73    3.84 
  -6  -8   0   17.81    4.38 
   6  -8   0   19.73    4.11 
  -6   8   0   18.36    4.38 
  -6  -8   0   15.62    6.03 
   6  -8   0   17.27    6.30 
  -6   8   0   14.52    5.21 
  -6  -8   0   16.72    6.03 
   6   8   0   13.15    4.38 
   7   8   0    5.76    3.29 
  -7   8   0    7.67    3.84 
   7  -8   0    4.93    3.56 
  -7  -8   0    4.93    2.74 
  -7  -8   0    5.48    4.11 
  -7   8   0    6.58    3.29 
   7   8   0    3.84    4.93 
  -7   8   0    5.21    3.29 
  -7  -8   0    5.76    4.11 
   7  -8   0    4.93    4.66 
  -7   8   0    3.84    4.93 
   7  -8   0   10.14    5.76 
  -7   8   0    6.58    6.03 
  -7  -8   0    6.03    5.48 
   7   8   0    5.76    5.76 
   8   8   0    2.74    3.84 
  -8   8   0    3.01    3.84 
   8  -8   0    2.19    3.56 
  -8  -8   0    3.01    3.01 
  -8  -8   0    6.30    4.38 
  -8   8   0    3.56    3.29 
   8   8   0    6.03    3.84 
  -8   8   0    5.48    3.56 
   8   8   0    1.92    4.93 
  -8  -8   0    4.11    4.11 
   8  -8   0    3.01    5.48 
  -8   8   0    3.01    3.84 
   8  -8   0    2.19    5.48 
  -8   8   0    3.56    6.03 
  -8  -8   0    3.84    5.48 
   8   8   0    4.38    4.38 
   9   8   0   55.36    4.93 
  -9   8   0   52.62    5.21 
   9  -8   0   48.51    4.93 
  -9  -8   0   47.96    4.38 
  -9  -8   0   44.67    6.58 
  -9   8   0   54.81    4.93 
   9   8   0   50.97    5.21 
  -9   8   0   -0.82    3.56 
   9   8   0   53.17    6.85 
  -9  -8   0   45.22    5.21 
   9  -8   0   41.66    5.21 
  -9   8   0   45.77    5.21 
   9  -8   0   49.33    5.48 
  -9   8   0   52.62    7.13 
  -9  -8   0   47.14    6.85 
   9   8   0   46.31    5.48 
 -10   8   0    2.47    4.11 
  10  -8   0    1.37    5.48 
 -10  -8   0    1.37    3.56 
 -10  -8   0    0.00    4.38 
 -10   8   0    0.82    7.40 
 -10   8   0   -1.37    6.58 
  10   8   0    2.74    4.11 
  10   8   0    4.11    4.38 
 -10  -8   0    3.29    4.11 
  10  -8   0    1.37    4.11 
 -10   8   0    1.10    4.11 
  10  -8   0    2.19    4.66 
 -10   8   0    0.00    5.76 
 -10  -8   0    0.00    4.38 
  10   8   0    0.27    6.03 
 -11   8   0    7.40    4.11 
  11  -8   0    6.85    4.11 
 -11  -8   0    3.29    4.66 
  11   8   0    2.74    6.03 
  11   8   0    6.03    4.38 
 -11  -8   0    6.30    4.38 
  11  -8   0    7.95    4.66 
 -11   8   0    6.03    4.38 
  11  -8   0    6.30    4.66 
 -11   8   0    6.30    4.66 
 -11  -8   0    6.30    4.66 
  11   8   0    6.30    4.66 
 -12   8   0   29.32    5.76 
  12  -8   0   35.08    4.93 
 -12  -8   0   29.05    5.21 
  12   8   0   31.79    4.93 
  12   8   0   34.80    6.85 
 -12  -8   0   33.98    6.58 
  12  -8   0   29.32    5.21 
 -12   8   0   29.87    4.93 
  12  -8   0   36.17    5.76 
 -12   8   0   35.35    5.76 
 -12  -8   0   27.13    6.58 
  12   8   0   28.50    5.76 
 -13   8   0   15.89    4.66 
  13  -8   0   19.46    4.66 
 -13  -8   0   19.46    7.40 
  13   8   0   18.91    4.93 
  13   8   0   18.36    5.21 
 -13  -8   0   19.73    5.21 
  13  -8   0   16.17    4.93 
 -13   8   0   17.54    6.30 
  13  -8   0   21.65    7.40 
 -13   8   0   16.72    6.58 
 -13  -8   0   18.91    4.93 
  13   8   0   23.02    5.21 
 -14   8   0   10.14    4.66 
  14  -8   0    5.21    4.38 
 -14  -8   0    4.66    6.85 
  14   8   0    7.40    4.93 
  14   8   0    6.58    4.93 
 -14  -8   0    5.48    5.21 
  14  -8   0    7.13    4.93 
 -14   8   0    6.03    4.93 
  14  -8   0    4.66    5.21 
 -14   8   0    6.30    5.21 
 -14  -8   0    4.93    6.30 
  14   8   0    7.40    4.93 
 -15   8   0   33.43    6.58 
  15  -8   0   53.99    5.48 
 -15  -8   0   41.93    7.95 
  15   8   0   42.20    7.13 
  15   8   0   53.99    6.30 
 -15  -8   0   45.49    6.58 
  15  -8   0   53.44    6.30 
 -15   8   0   43.03    5.76 
  15  -8   0   47.14    6.30 
 -15   8   0   46.86    6.58 
 -15  -8   0   52.34    6.03 
  15   8   0   50.97    6.03 
 -16   8   0    2.19    4.93 
  16  -8   0   -0.82    4.66 
 -16  -8   0    0.00    6.85 
  16   8   0   -0.27    4.93 
  16   8   0    0.00    5.21 
 -16  -8   0    0.55    5.21 
  16  -8   0   -1.37    5.21 
 -16   8   0    2.19    5.21 
  16  -8   0    0.82    7.40 
 -16   8   0    0.27    5.48 
 -16  -8   0   -0.82    5.21 
  16   8   0    1.64    5.48 
 -17   8   0    0.82    4.93 
  17  -8   0    1.37    4.93 
 -17  -8   0   -0.55    5.76 
  17   8   0    4.11    5.48 
  17   8   0    1.64    5.21 
 -17  -8   0    0.27    5.48 
  17  -8   0   -2.19    7.67 
 -17   8   0    1.92    7.40 
  17  -8   0   -1.64    5.48 
 -17   8   0   -0.82    5.76 
 -17  -8   0   -2.74    5.48 
  17   8   0    0.00    5.48 
   0   9   0    0.82    4.66 
   0  -9   0    0.00    3.29 
   0  -9   0    1.10    4.66 
   0   9   0    1.10    3.29 
   0  -9   0    0.82    3.84 
   0  -9   0    3.01    4.11 
   0  -9   0    0.00    4.66 
   0   9   0   -2.47    5.76 
  -1   9   0  100.85    7.13 
   1   9   0  105.51    7.13 
   1  -9   0  112.36    6.85 
  -1  -9   0  108.80    6.85 
   1  -9   0  114.83    7.95 
  -1  -9   0  105.78    7.13 
  -1   9   0  112.09    7.40 
   1   9   0  107.70    7.67 
   1  -9   0  113.73    7.40 
  -1  -9   0  102.77    6.85 
   1  -9   0  106.06    7.40 
  -1  -9   0  106.61    8.22 
   1  -9   0  110.44    7.67 
  -1  -9   0  113.73    7.67 
  -1   9   0  112.09    7.40 
   1   9   0  100.58    7.13 
   2   9   0  146.62    7.95 
  -2   9   0  124.14    7.95 
   2  -9   0  135.65    8.22 
  -2  -9   0  141.96    7.95 
   2  -9   0  143.33    8.22 
  -2  -9   0  142.78    8.22 
  -2   9   0  152.92    8.22 
   2   9   0  142.78    7.95 
   2  -9   0  143.88    8.22 
  -2  -9   0  143.05    8.50 
   2  -9   0  151.00    8.77 
  -2  -9   0  145.79    8.50 
   2  -9   0  136.48    9.32 
  -2  -9   0  138.40    9.04 
  -2   9   0  138.67    8.50 
   2   9   0  137.03    9.04 
   3   9   0  117.57    7.40 
  -3   9   0  123.87    8.22 
   3  -9   0  140.86    7.95 
  -3  -9   0  144.70    7.95 
   3  -9   0  127.71    7.67 
  -3  -9   0  137.03    8.22 
  -3   9   0  150.45    8.77 
   3   9   0  122.77    7.67 
   3  -9   0  146.34    8.50 
  -3  -9   0  134.28    8.22 
   3  -9   0  135.11    8.22 
  -3  -9   0  123.05    8.50 
   3  -9   0  139.77    8.50 
  -3  -9   0  131.27    8.22 
  -3   9   0  138.40    8.22 
   3   9   0  142.51    8.50 
   4   9   0  312.97   13.43 
  -4   9   0  277.34   12.33 
   4  -9   0  315.43   13.43 
  -4  -9   0  259.25   11.78 
   4  -9   0  298.99   13.43 
  -4  -9   0  287.20   12.88 
  -4   9   0  304.47   13.15 
   4   9   0  299.54   13.15 
   4  -9   0  303.10   13.70 
  -4  -9   0  285.01   12.88 
   4  -9   0  283.92   13.15 
  -4  -9   0  281.72   12.88 
   4  -9   0  274.60   12.88 
  -4  -9   0  277.06   12.88 
  -4   9   0  285.56   12.88 
   4   9   0  278.98   13.15 
   5   9   0  181.15    9.32 
  -5   9   0  163.33    9.04 
   5  -9   0  160.32    9.59 
  -5  -9   0  167.99    9.59 
   5  -9   0  180.87    9.59 
  -5  -9   0  174.02   10.69 
  -5   9   0  190.46    9.87 
   5   9   0  171.56    9.32 
   5  -9   0  167.44   10.14 
  -5  -9   0  157.58    9.04 
   5  -9   0  164.43    9.32 
  -5  -9   0  164.70    9.59 
   5  -9   0  161.96    9.59 
  -5  -9   0  157.03    9.87 
  -5   9   0  168.81    9.59 
   5   9   0  158.68    9.32 
   6   9   0   38.09    4.38 
  -6   9   0   34.80    4.66 
   6  -9   0   35.08    6.03 
  -6  -9   0   33.43    5.21 
  -6  -9   0   30.97    6.30 
  -6   9   0   37.82    4.38 
   6   9   0   34.53    5.76 
  -6   9   0   39.19    4.66 
  -6  -9   0   37.82    5.21 
   6  -9   0   36.45    4.93 
  -6  -9   0   30.69    6.58 
  -6   9   0   35.63    5.21 
   6  -9   0   32.06    6.58 
  -6  -9   0   27.13    6.30 
  -6   9   0   35.63    5.76 
   6   9   0   30.69    4.93 
   7   9   0    2.74    4.11 
  -7   9   0    4.93    5.76 
   7  -9   0    4.38    4.11 
  -7  -9   0    4.11    4.11 
  -7  -9   0    4.11    4.66 
  -7   9   0    3.84    3.84 
   7   9   0    3.56    4.11 
  -7   9   0    2.47    3.84 
  -7  -9   0    1.92    4.38 
   7  -9   0    1.92    4.11 
  -7  -9   0    3.01    6.30 
  -7   9   0    1.64    4.11 
   7  -9   0    6.30    4.93 
  -7  -9   0    3.56    5.76 
  -7   9   0    3.56    5.21 
   7   9   0    4.38    4.38 
   8   9   0   20.28    4.66 
  -8   9   0   22.47    4.66 
   8  -9   0   16.99    4.38 
  -8  -9   0   18.36    4.93 
  -8  -9   0   15.62    4.93 
  -8   9   0   22.20    4.38 
   8   9   0   18.91    4.38 
  -8   9   0    0.82    4.11 
  -8  -9   0   18.36    5.48 
   8  -9   0   16.72    4.66 
  -8   9   0   21.65    4.66 
  -8  -9   0   13.98    6.03 
   8  -9   0   22.20    5.21 
  -8   9   0   18.91    5.48 
  -8  -9   0   18.64    6.58 
   8   9   0   18.09    4.93 
   9   9   0    8.22    3.84 
  -9   9   0    3.56    5.21 
   9  -9   0   10.14    6.03 
  -9  -9   0    6.85    4.66 
  -9  -9   0    6.85    6.03 
   9   9   0    6.30    5.76 
  -9  -9   0    4.93    4.66 
   9  -9   0    5.48    4.66 
  -9   9   0    4.66    4.38 
  -9  -9   0    5.48    4.66 
   9  -9   0    6.85    4.93 
  -9   9   0    6.85    4.93 
  -9  -9   0    5.76    4.66 
   9   9   0    8.77    6.58 
  10   9   0   19.46    4.93 
 -10   9   0   20.83    4.66 
  10  -9   0   21.38    5.76 
 -10  -9   0   19.46    4.66 
 -10  -9   0   18.36    5.21 
  10   9   0   19.18    4.66 
  10   9   0   18.36    4.93 
 -10  -9   0   19.73    6.85 
  10  -9   0   17.27    4.93 
 -10   9   0   20.01    4.93 
  10  -9   0   16.99    6.85 
 -10   9   0   22.20    5.21 
 -10  -9   0   23.29    5.21 
  10   9   0   15.07    4.93 
 -11   9   0    6.85    5.76 
  11  -9   0    6.03    4.38 
 -11  -9   0    3.56    6.30 
  11   9   0    4.11    4.66 
  11   9   0    5.76    4.93 
 -11  -9   0    3.56    4.66 
  11  -9   0    9.87    4.93 
 -11   9   0    7.95    4.66 
  11  -9   0    6.85    5.21 
 -11   9   0    7.13    4.93 
 -11  -9   0    6.03    5.48 
  11   9   0    8.50    6.85 
 -12   9   0   37.54    5.21 
  12  -9   0   42.20    5.21 
 -12  -9   0   40.56    6.58 
  12   9   0   39.46    5.76 
  12   9   0   47.41    5.76 
 -12  -9   0   38.37    5.76 
  12  -9   0   37.27    6.03 
 -12   9   0   36.17    5.48 
  12  -9   0   38.09    6.03 
 -12   9   0   42.20    6.85 
 -12  -9   0   36.72    5.76 
  12   9   0   36.72    5.76 
 -13   9   0  151.00    8.22 
  13  -9   0  161.96    7.40 
 -13  -9   0  155.11    8.22 
  13   9   0  169.36    8.77 
  13   9   0  177.04    8.22 
 -13  -9   0  147.17    9.59 
  13  -9   0  158.95    7.95 
 -13   9   0  157.58    9.32 
  13  -9   0  154.84    9.04 
 -13   9   0  152.65    8.22 
 -13  -9   0  142.78    7.67 
  13   9   0  140.59    9.32 
 -14   9   0    6.85    4.93 
  14  -9   0    5.21    4.93 
 -14  -9   0    9.32    5.48 
  14   9   0    6.03    5.21 
  14   9   0    8.50    5.21 
 -14  -9   0    6.30    5.48 
  14  -9   0    5.21    5.21 
 -14   9   0    7.13    5.21 
  14  -9   0    6.58    5.48 
 -14   9   0    3.56    6.58 
 -14  -9   0    4.93    5.21 
  14   9   0    3.56    5.76 
 -15   9   0    3.29    4.93 
  15  -9   0    2.47    4.93 
 -15  -9   0    3.56    5.76 
  15   9   0    0.55    5.21 
  15   9   0    2.74    6.85 
 -15  -9   0   -1.64    5.21 
  15  -9   0   -0.27    5.48 
 -15   9   0    0.00    5.48 
  15  -9   0    2.47    5.48 
 -15   9   0    0.00    5.76 
 -15  -9   0    0.82    7.67 
  15   9   0    0.00    5.48 
 -16   9   0   15.35    6.58 
  16  -9   0   16.17    6.58 
 -16  -9   0   15.62    6.30 
  16   9   0   17.54    7.40 
  16   9   0   15.89    5.76 
 -16  -9   0    9.04    5.76 
  16  -9   0   17.54    7.67 
 -16   9   0   10.96    6.03 
  16  -9   0   14.25    8.50 
 -16   9   0   13.70    6.30 
 -16  -9   0   12.61    5.76 
  16   9   0    9.32    5.76 
   0  10   0   21.10    4.38 
   0 -10   0   21.38    4.38 
   0 -10   0   19.73    6.30 
   0  10   0   23.57    4.66 
   0 -10   0   24.39    4.93 
   0 -10   0   12.33    5.48 
   0 -10   0   18.91    6.58 
   0  10   0   17.54    5.76 
   1  10   0    0.00    3.84 
  -1  10   0    0.55    3.84 
   1 -10   0    2.47    5.21 
  -1 -10   0    2.47    3.84 
   1 -10   0    1.92    4.93 
  -1 -10   0    3.29    4.66 
  -1  10   0    1.64    4.93 
   1  10   0    1.64    3.84 
   1 -10   0    2.19    5.76 
  -1 -10   0    3.84    4.38 
   1 -10   0    2.19    4.38 
  -1 -10   0    2.19    4.38 
   1 -10   0    3.29    4.66 
  -1 -10   0    4.11    4.66 
  -1  10   0    1.64    4.66 
   1  10   0    2.19    4.38 
   2  10   0   60.84    5.48 
  -2  10   0   60.02    6.03 
   2 -10   0   67.69    6.03 
  -2 -10   0   64.40    5.76 
   2 -10   0   64.13    7.40 
  -2 -10   0   64.40    6.30 
  -2  10   0   63.85    5.76 
   2  10   0   65.22    6.85 
   2 -10   0   66.32    6.30 
  -2 -10   0   54.26    6.30 
   2 -10   0   68.51    6.58 
  -2 -10   0   56.73    6.30 
   2 -10   0   66.05    7.40 
  -2 -10   0   67.14    6.58 
  -2  10   0   70.16    6.58 
   2  10   0   62.48    6.30 
   3  10   0   73.45    6.30 
  -3  10   0   69.06    6.30 
   3 -10   0   75.64    7.40 
  -3 -10   0   69.88    6.03 
   3 -10   0   85.23    8.22 
  -3 -10   0   71.25    7.40 
  -3  10   0   78.65    6.30 
   3  10   0   74.82    6.58 
   3 -10   0   71.25    6.85 
  -3 -10   0   68.24    6.58 
   3 -10   0   52.89    7.67 
  -3 -10   0   68.51    6.85 
   3 -10   0   70.43    6.85 
  -3 -10   0   77.83    8.50 
  -3  10   0   72.08    6.85 
   3  10   0   70.16    6.85 
   4  10   0   35.90    5.76 
  -4  10   0   36.45    4.93 
   4 -10   0   40.01    4.93 
  -4 -10   0   37.54    4.93 
   4 -10   0   39.46    6.03 
  -4 -10   0   40.01    5.21 
  -4  10   0   45.22    5.21 
   4  10   0   39.74    6.03 
   4 -10   0   41.93    5.48 
  -4 -10   0   38.92    5.21 
   4 -10   0   40.29    5.48 
  -4 -10   0   41.38    5.48 
   4 -10   0   40.01    7.13 
  -4 -10   0   33.71    6.58 
  -4  10   0   39.19    5.48 
   4  10   0   41.66    5.48 
   5  10   0   88.52    7.13 
  -5  10   0   88.79    7.13 
   5 -10   0   89.61    7.13 
  -5 -10   0   82.49    7.13 
   5 -10   0   87.15    7.40 
  -5 -10   0   90.44    8.50 
  -5  10   0   89.07    7.40 
   5  10   0   78.93    6.85 
   5 -10   0   80.57    8.22 
  -5 -10   0   80.02    7.13 
   5 -10   0   78.10    7.13 
  -5 -10   0   83.59    8.77 
   5 -10   0   81.39    7.40 
  -5 -10   0   71.25    7.13 
  -5  10   0   81.12    7.95 
   5  10   0   78.93    8.22 
   6  10   0    1.10    4.38 
  -6  10   0   -0.55    4.11 
   6 -10   0    0.00    4.11 
  -6 -10   0    0.55    4.66 
  -6 -10   0   -0.82    6.85 
  -6  10   0    0.00    4.11 
   6  10   0   -0.82    4.93 
  -6  10   0    2.19    4.66 
   6 -10   0    1.37    5.48 
  -6 -10   0   -0.27    4.66 
   6 -10   0    2.74    4.38 
  -6 -10   0   -0.27    6.30 
   6 -10   0   -0.27    6.30 
  -6 -10   0    1.64    4.66 
  -6  10   0    0.27    6.03 
   6  10   0   -0.82    4.66 
   7  10   0   14.80    5.21 
  -7  10   0   15.07    6.30 
   7 -10   0   13.15    5.48 
  -7 -10   0   13.15    4.93 
  -7 -10   0   18.09    5.21 
   7  10   0   11.51    4.66 
   7 -10   0   11.51    4.93 
  -7 -10   0    9.87    6.03 
   7 -10   0   10.14    4.93 
  -7 -10   0   11.24    6.30 
   7 -10   0   18.36    5.48 
  -7 -10   0   11.24    5.76 
  -7  10   0   11.78    5.76 
   7  10   0   14.25    6.30 
   8  10   0    7.13    5.76 
  -8  10   0    9.87    4.38 
   8 -10   0   12.33    5.76 
  -8 -10   0    9.59    5.21 
  -8 -10   0    8.50    5.21 
   8  10   0   10.69    4.66 
  -8 -10   0   11.51    4.93 
   8 -10   0    9.04    4.66 
  -8 -10   0   11.78    7.13 
  -8  10   0    7.40    4.93 
   8 -10   0   10.41    5.48 
  -8 -10   0   13.43    7.13 
  -8  10   0   13.43    5.21 
   8  10   0    5.48    4.93 
   9  10   0    9.32    5.21 
  -9  10   0    8.22    4.66 
   9 -10   0    6.03    5.76 
  -9 -10   0    6.58    4.93 
  -9 -10   0    5.21    5.48 
   9  10   0    7.67    5.76 
  -9 -10   0    7.67    4.93 
   9 -10   0    5.21    4.93 
  -9 -10   0    8.50    5.21 
  -9  10   0    6.30    4.93 
   9 -10   0    7.95    7.40 
  -9 -10   0    9.04    5.21 
  -9  10   0    8.77    5.21 
   9  10   0    6.58    5.21 
 -10  10   0    1.10    4.66 
  10 -10   0    0.82    4.38 
 -10 -10   0    0.82    5.21 
  10  10   0   -0.27    4.66 
 -10 -10   0    0.27    4.93 
  10 -10   0    2.19    4.93 
 -10  10   0    1.37    6.30 
 -10 -10   0    0.82    5.21 
  10 -10   0   -0.27    5.48 
 -10  10   0    0.55    5.21 
 -10 -10   0    1.64    5.21 
  10  10   0    3.29    4.93 
 -11  10   0   21.65    5.21 
  11 -10   0   23.29    4.93 
 -11 -10   0   19.46    7.40 
  11  10   0   19.73    5.76 
 -11 -10   0   22.75    5.76 
  11 -10   0   25.49    6.85 
 -11  10   0   21.10    6.30 
 -11 -10   0   22.20    6.58 
  11 -10   0   22.47    5.76 
 -11  10   0   18.09    7.40 
 -11 -10   0   21.92    7.13 
  11  10   0   23.57    5.76 
 -12  10   0   18.36    5.21 
  12 -10   0   20.28    5.21 
 -12 -10   0   19.46    6.03 
  12  10   0   21.38    5.48 
 -12 -10   0   19.18    5.48 
  12 -10   0   18.09    7.67 
 -12  10   0   18.91    5.48 
 -12 -10   0   19.73    6.03 
  12 -10   0   14.52    6.58 
 -12  10   0   22.20    6.03 
 -12 -10   0   24.39    5.76 
  12  10   0   18.09    6.30 
 -13  10   0  173.20    7.95 
  13 -10   0  175.67    7.67 
 -13 -10   0  175.67    8.77 
  13  10   0  184.98    8.22 
  13  10   0  192.11    8.77 
 -13 -10   0  158.13    8.50 
  13 -10   0  161.96    8.77 
 -13  10   0  163.33    8.22 
  13 -10   0  166.62    8.77 
 -13  10   0  161.96    8.50 
 -13 -10   0  145.52    8.50 
  13  10   0  174.84    8.50 
 -14  10   0    2.19    5.21 
  14 -10   0    0.55    5.21 
 -14 -10   0   -0.27    6.03 
  14  10   0    0.00    5.76 
  14  10   0    0.55    5.48 
 -14 -10   0    4.93    5.76 
  14 -10   0    1.10    6.03 
 -14  10   0    1.92    6.85 
  14 -10   0    2.47    7.40 
 -14  10   0    0.00    5.76 
 -14 -10   0    4.93    5.76 
  14  10   0    1.37    7.13 
   0  11   0    0.55    4.11 
   0 -11   0    0.27    5.48 
   0 -11   0   -1.64    6.30 
   0  11   0    0.55    4.66 
   0 -11   0    0.82    4.66 
   0 -11   0    0.82    6.03 
   0 -11   0    3.01    6.30 
   0  11   0   -1.10    4.66 
   1  11   0    9.32    5.21 
  -1  11   0    9.59    4.38 
   1 -11   0   11.78    4.66 
  -1 -11   0   12.33    6.30 
   1 -11   0   13.43    6.03 
  -1 -11   0   10.41    5.21 
  -1  11   0   11.51    5.76 
   1  11   0    9.32    4.66 
   1 -11   0   11.24    4.93 
  -1 -11   0   12.61    5.21 
   1 -11   0    7.95    4.93 
  -1 -11   0    8.22    5.21 
   1 -11   0    8.77    4.93 
  -1 -11   0   10.96    5.21 
  -1  11   0    5.76    6.58 
   1  11   0   13.15    5.21 
   2  11   0   27.68    4.93 
  -2  11   0   27.68    5.21 
   2 -11   0   28.23    5.21 
  -2 -11   0   23.29    5.76 
   2 -11   0   33.43    7.40 
  -2 -11   0   36.45    6.58 
  -2  11   0   30.97    6.03 
   2  11   0   30.15    5.48 
   2 -11   0   27.13    5.48 
  -2 -11   0   25.21    7.13 
   2 -11   0   28.23    7.13 
  -2 -11   0   27.68    5.76 
   2 -11   0   32.06    6.03 
  -2 -11   0   31.24    5.76 
  -2  11   0   28.23    6.85 
   2  11   0   29.87    5.76 
   3  11   0   56.73    6.03 
  -3  11   0   64.13    6.30 
   3 -11   0   62.48    6.30 
  -3 -11   0   61.94    7.40 
   3 -11   0   57.00    6.85 
  -3 -11   0   59.47    8.22 
  -3  11   0   65.22    6.58 
   3  11   0   68.51    7.67 
   3 -11   0   64.95    7.95 
  -3 -11   0   63.85    6.85 
   3 -11   0   56.45    6.85 
  -3 -11   0   56.18    8.22 
   3 -11   0   67.14    8.22 
  -3 -11   0   66.32    7.13 
  -3  11   0   67.96    7.13 
   3  11   0   62.21    7.95 
   4  11   0    4.38    4.38 
  -4  11   0    7.13    4.38 
   4 -11   0    8.50    6.30 
  -4 -11   0    5.48    4.38 
   4 -11   0    9.59    6.03 
  -4 -11   0    5.76    5.21 
  -4  11   0    4.11    5.21 
   4  11   0    4.93    4.66 
   4 -11   0    9.04    7.13 
  -4 -11   0    3.01    4.93 
   4 -11   0    4.93    4.93 
  -4 -11   0    4.66    5.21 
   4 -11   0    6.30    5.21 
  -4 -11   0    8.77    5.21 
  -4  11   0    3.56    4.93 
   4  11   0    5.76    4.93 
   5  11   0   14.52    4.93 
  -5  11   0   17.54    4.66 
   5 -11   0   15.35    4.66 
  -5 -11   0   13.98    6.03 
  -5 -11   0   15.89    5.48 
   5  11   0   16.17    4.93 
   5 -11   0    9.59    6.58 
  -5 -11   0   10.69    5.21 
   5 -11   0   13.43    6.58 
  -5 -11   0   13.70    5.21 
   5 -11   0   22.47    7.67 
  -5 -11   0   12.61    5.48 
  -5  11   0   12.61    5.21 
   5  11   0   10.96    5.21 
   6  11   0   18.09    4.93 
  -6  11   0   18.64    4.93 
   6 -11   0   15.89    4.66 
  -6 -11   0   18.09    5.76 
  -6 -11   0   20.55    6.85 
   6  11   0   19.18    4.93 
   6 -11   0   12.33    6.58 
  -6 -11   0   17.81    6.85 
   6 -11   0   17.27    5.76 
  -6 -11   0   16.44    5.48 
   6 -11   0   17.27    5.76 
  -6 -11   0   15.35    5.48 
  -6  11   0   23.02    5.48 
   6  11   0   20.55    5.48 
   7  11   0   11.24    5.21 
  -7  11   0   11.78    6.58 
   7 -11   0   10.96    4.66 
  -7 -11   0   12.88    6.30 
  -7 -11   0   10.14    5.48 
   7  11   0   13.98    4.93 
   7 -11   0   13.15    6.85 
  -7 -11   0   10.69    5.21 
   7 -11   0    7.95    5.21 
  -7 -11   0   10.69    5.21 
   7 -11   0   12.33    7.40 
  -7 -11   0   12.61    5.48 
  -7  11   0   13.15    7.40 
   7  11   0   11.51    5.21 
   8  11   0    2.19    4.93 
  -8  11   0    0.82    4.66 
   8 -11   0    0.82    4.66 
  -8 -11   0    0.55    4.66 
  -8 -11   0    2.19    5.48 
   8  11   0    0.00    4.93 
   8 -11   0    2.47    6.30 
  -8 -11   0    3.01    5.21 
   8 -11   0    0.27    4.93 
  -8 -11   0    0.00    5.76 
   8 -11   0    0.00    5.48 
  -8 -11   0    0.27    5.76 
  -8  11   0    0.55    5.76 
   8  11   0    0.00    5.21 
  -9  11   0   -0.27    4.66 
   9 -11   0    1.92    4.66 
  -9 -11   0    0.00    5.48 
   9  11   0    1.10    4.93 
   9 -11   0    0.00    6.58 
  -9 -11   0    2.19    5.21 
   9 -11   0    0.55    5.21 
  -9 -11   0    0.00    5.21 
   9 -11   0    4.93    8.22 
  -9 -11   0    4.38    5.48 
  -9  11   0   -2.19    5.21 
   9  11   0    4.93    5.48 
 -10  11   0    5.76    6.03 
  10 -11   0    7.67    4.93 
 -10 -11   0    9.04    5.76 
  10  11   0    4.66    5.21 
  10 -11   0    3.01    5.21 
 -10 -11   0    8.77    7.67 
  10 -11   0    6.58    7.67 
 -10 -11   0    0.55    5.48 
  10 -11   0    3.84    5.76 
 -10 -11   0    5.76    5.76 
 -10  11   0    6.85    5.76 
  10  11   0    3.84    5.48 
 -11  11   0   17.81    5.21 
  11 -11   0   17.81    5.21 
 -11 -11   0   17.54    6.30 
  11  11   0   16.99    7.67 
 -11 -11   0   12.61    6.03 
  11 -11   0   18.91    6.58 
 -11 -11   0   17.27    6.03 
 -11  11   0   22.20    6.03 
  11 -11   0   21.65    7.67 
 -11 -11   0   14.80    6.58 
 -11  11   0   24.66    7.13 
  11  11   0   17.81    5.76 
   0  12   0   -1.10    6.58 
   0 -12   0    1.92    4.66 
   0 -12   0    3.56    7.13 
   0  12   0    4.66    5.21 
   0 -12   0    1.64    5.21 
   0 -12   0    1.64    5.48 
   0 -12   0    4.66    5.48 
   0  12   0    0.27    5.21 
  -1  12   0    1.37    5.21 
   1  12   0    2.47    4.66 
   1 -12   0    0.55    4.66 
  -1 -12   0    3.01    4.66 
   1 -12   0    1.64    7.67 
  -1 -12   0   -0.55    7.13 
  -1  12   0    5.21    5.21 
   1  12   0    6.30    5.21 
   1 -12   0    0.27    5.21 
  -1 -12   0    0.55    6.85 
   1 -12   0    1.64    5.48 
  -1 -12   0    0.55    6.85 
   1 -12   0    1.10    5.48 
  -1 -12   0    6.58    6.85 
  -1  12   0    0.00    5.21 
   1  12   0   -2.47    5.21 
   2  12   0   14.25    4.93 
  -2  12   0    9.87    4.93 
   2 -12   0   12.06    4.93 
  -2 -12   0   12.06    4.93 
  -2 -12   0    9.32    7.40 
   2  12   0   19.46    5.21 
   2 -12   0   13.15    5.48 
  -2 -12   0   18.09    7.13 
   2 -12   0    9.32    7.13 
  -2 -12   0    5.76    5.48 
   2 -12   0   10.41    5.76 
  -2 -12   0   13.43    7.13 
  -2  12   0   16.44    5.48 
   2  12   0   14.80    5.48 
   3  12   0   31.79    5.76 
  -3  12   0   27.13    5.21 
   3 -12   0   27.95    5.21 
  -3 -12   0   33.71    5.48 
  -3 -12   0   30.15    7.67 
   3  12   0   32.34    5.48 
   3 -12   0   24.94    5.76 
  -3 -12   0   25.21    6.03 
   3 -12   0   26.03    6.03 
  -3 -12   0   28.50    6.03 
   3 -12   0   16.17    7.40 
  -3 -12   0   23.29    7.40 
  -3  12   0   27.13    5.76 
   3  12   0   28.78    5.76 
   4  12   0    1.64    6.30 
  -4  12   0   -1.64    4.66 
   4 -12   0    3.29    4.93 
  -4 -12   0    0.00    4.66 
  -4 -12   0    3.01    6.30 
   4  12   0    1.10    6.85 
   4 -12   0    1.37    5.48 
  -4 -12   0   -0.27    5.21 
   4 -12   0    4.38    6.85 
  -4 -12   0    0.00    5.21 
   4 -12   0    0.55    5.48 
  -4 -12   0    0.55    7.13 
  -4  12   0   -1.10    5.21 
   4  12   0    1.10    6.58 
   5  12   0    5.21    5.76 
  -5  12   0    2.47    4.93 
   5 -12   0    8.22    6.30 
  -5 -12   0    4.93    5.48 
  -5 -12   0    0.55    6.03 
   5  12   0    1.64    5.21 
   5 -12   0    3.84    5.48 
  -5 -12   0    1.10    5.48 
   5 -12   0    3.84    5.48 
  -5 -12   0    2.47    5.48 
   5 -12   0    3.01    5.76 
  -5 -12   0    6.03    7.67 
  -5  12   0    3.29    5.48 
   5  12   0    1.92    5.76 
   6  12   0   -2.19    6.30 
  -6  12   0   -1.92    6.30 
   6 -12   0   -1.64    4.93 
  -6 -12   0    0.00    6.30 
  -6 -12   0    0.27    6.30 
   6  12   0   -3.29    5.21 
   6 -12   0    0.00    5.48 
  -6 -12   0   -1.10    5.48 
   6 -12   0    0.00    5.48 
  -6 -12   0   -2.74    5.48 
   6 -12   0    0.27    7.67 
  -6 -12   0   -1.64    5.48 
  -6  12   0    0.55    5.48 
   6  12   0   -0.82    5.48 
   7  12   0    1.64    6.85 
  -7  12   0    0.82    4.93 
   7 -12   0    0.00    4.93 
  -7 -12   0    3.29    7.13 
  -7 -12   0    1.37    6.03 
   7  12   0    1.37    7.40 
   7 -12   0   -4.66    5.48 
  -7 -12   0   -0.82    5.48 
   7 -12   0   -1.37    7.13 
  -7 -12   0    0.82    5.48 
   7 -12   0   -1.37    6.03 
  -7 -12   0   -0.27    5.76 
  -7  12   0    1.37    5.48 
   7  12   0    3.01    5.48 
  -8  12   0    1.10    4.93 
   8 -12   0    2.19    4.93 
  -8 -12   0   -1.10    6.03 
   8  12   0    3.56    5.48 
   8 -12   0   -0.55    7.40 
  -8 -12   0    1.92    7.13 
   8 -12   0   -0.82    5.48 
  -8 -12   0    1.37    5.76 
   8 -12   0    3.84    6.03 
  -8 -12   0    0.27    5.76 
  -8  12   0   -1.37    7.95 
   8  12   0   -0.27    5.48 
 -22   0  -1    0.00    5.48 
  22   0   1    0.27    5.21 
  22   0   1    0.00    5.76 
 -22   0  -1   -0.55    7.95 
 -22   0  -1    0.00    5.76 
 -22   0  -1    1.92    6.30 
 -21   0  -1   -0.82    4.93 
  21   0   1    2.74    6.30 
  21   0   1    1.37    6.85 
 -21   0  -1   -1.37    6.30 
 -21   0  -1    0.27    5.48 
 -21   0  -1   -0.55    6.58 
  20   0   1    1.37    4.38 
  20   0   1   -3.84    5.76 
 -20   0  -1    1.37    5.76 
  20   0   1   -1.10    4.66 
  20   0   1   -0.27    4.93 
 -20   0  -1    1.64    4.93 
 -20   0  -1   -0.82    7.40 
 -20   0  -1   -2.47    4.93 
  19   0   1   -0.27    4.11 
  19   0   1    0.55    4.93 
 -19   0  -1    0.82    6.58 
  19   0   1   -0.27    4.38 
  19   0   1    2.47    4.66 
 -19   0  -1    0.27    4.66 
 -19   0  -1   -2.74    5.21 
 -19   0  -1    0.82    4.93 
  18   0   1    0.82    4.66 
  18   0   1    0.00    3.56 
 -18   0  -1    3.01    4.38 
  18   0   1   -1.64    5.21 
  18   0   1   -0.55    4.66 
 -18   0  -1    0.00    4.38 
 -18   0  -1   -1.64    4.38 
 -18   0  -1    1.64    4.93 
 -17   0  -1    0.82    4.11 
  17   0   1   -0.82    4.11 
 -17   0  -1    0.27    4.11 
  17   0   1    1.10    4.11 
  17   0   1   -0.27    3.84 
 -17   0  -1    0.55    5.21 
 -17   0  -1    0.55    4.38 
 -17   0  -1   -2.74    5.21 
 -16   0  -1    0.27    3.84 
  16   0   1    0.27    3.01 
 -16   0  -1    1.37    4.11 
  16   0   1    0.00    3.84 
  16   0   1    0.27    3.84 
 -16   0  -1    0.00    5.21 
 -16   0  -1   -0.27    5.76 
 -16   0  -1    0.27    5.21 
 -15   0  -1   -0.82    2.74 
  15   0   1    0.00    2.74 
 -15   0  -1    1.10    3.56 
  15   0   1    0.82    4.11 
  15   0   1    0.27    4.38 
 -15   0  -1    1.37    3.56 
 -15   0  -1   -0.55    3.84 
 -15   0  -1    0.00    3.84 
 -14   0  -1   -0.27    3.29 
  14   0   1   -0.82    3.29 
 -14   0  -1   -1.37    3.29 
  14   0   1    1.10    3.29 
  14   0   1    0.27    3.29 
 -14   0  -1    0.27    3.29 
 -14   0  -1   -0.27    3.56 
 -14   0  -1   -0.55    3.29 
 -13   0  -1    2.47    3.29 
  13   0   1    0.27    3.29 
 -13   0  -1    2.47    3.29 
  13   0   1    0.00    3.56 
  13   0   1    0.55    3.01 
 -13   0  -1    0.00    3.01 
 -13   0  -1    0.82    3.29 
 -13   0  -1    0.00    3.56 
 -12   0  -1   -0.27    2.19 
  12   0   1    0.00    2.47 
 -12   0  -1   -0.27    2.74 
  12   0   1   -1.37    2.74 
  12   0   1    0.27    4.11 
 -12   0  -1    0.00    3.01 
 -12   0  -1   -1.10    3.84 
 -12   0  -1    0.00    4.38 
 -11   0  -1    0.27    2.47 
  11   0   1    0.00    1.92 
 -11   0  -1    0.00    2.74 
  11   0   1   -0.82    2.47 
  11   0   1    0.00    2.74 
 -11   0  -1   -1.92    3.84 
 -11   0  -1    0.55    3.01 
 -11   0  -1    0.00    2.74 
 -10   0  -1    0.00    2.47 
  10   0   1    0.00    2.47 
 -10   0  -1    0.82    2.47 
  10   0   1    0.00    3.56 
  10   0   1    0.27    3.56 
 -10   0  -1    0.00    3.56 
  10   0   1    0.00    2.47 
 -10   0  -1    0.00    2.74 
  -9   0  -1    0.82    2.19 
   9   0   1    0.00    2.47 
  -9   0  -1    0.00    2.47 
   9   0   1    0.27    2.19 
   9   0   1    0.82    2.19 
  -9   0  -1    0.00    2.74 
   9   0   1    0.00    2.47 
  -9   0  -1    0.00    3.01 
  -8   0  -1    0.55    1.92 
   8   0   1    0.55    2.19 
  -8   0  -1    1.37    3.01 
   8   0   1    0.00    2.19 
   8   0   1    1.37    2.19 
  -8   0  -1    0.55    2.74 
   8   0   1    0.00    3.01 
  -8   0  -1    0.00    2.47 
  -7   0  -1    0.27    2.19 
   7   0   1    0.27    2.19 
  -7   0  -1   -0.82    2.19 
   7   0   1    0.82    1.92 
   7   0   1   -0.82    2.74 
  -7   0  -1   -0.27    2.47 
   7   0   1    0.00    3.01 
  -7   0  -1    0.00    3.29 
  -6   0  -1    0.00    1.92 
   6   0   1    0.00    1.64 
  -6   0  -1    0.00    2.74 
   6   0   1    0.55    2.74 
   6   0   1    0.00    2.47 
  -6   0  -1    0.55    2.47 
   6   0   1    0.00    1.92 
  -6   0  -1   -0.27    2.19 
  -5   0  -1    0.00    1.64 
   5   0   1    0.27    1.64 
  -5   0  -1   -0.55    2.47 
   5   0   1    0.00    1.92 
   5   0   1    0.00    2.19 
  -5   0  -1    0.00    1.92 
   5   0   1    0.00    1.92 
  -5   0  -1   -1.37    2.74 
  -4   0  -1    0.27    1.64 
   4   0   1    0.00    1.64 
  -4   0  -1   -0.55    2.19 
   4   0   1    3.01    2.19 
   4   0   1    0.00    1.64 
  -4   0  -1    0.00    2.19 
   4   0   1    0.00    2.19 
  -4   0  -1    0.82    2.19 
  -3   0  -1    0.27    2.74 
   3   0   1    0.55    3.01 
  -3   0  -1    0.00    1.64 
   3   0   1    0.27    1.92 
   3   0   1    0.27    3.01 
  -3   0  -1    0.82    2.74 
   3   0   1    0.82    1.92 
  -3   0  -1    1.37    1.92 
  -2   0  -1    3.29    2.47 
   2   0   1    5.76    2.19 
  -2   0  -1    3.84    1.92 
   2   0   1    5.76    2.19 
   2   0   1    4.11    2.19 
  -2   0  -1    4.66    2.19 
   2   0   1    3.84    1.64 
  -2   0  -1    5.76    1.92 
  -1   0  -1    0.82    1.92 
   1   0   1    3.01    2.19 
   1   0   1    2.74    2.19 
  -1   0  -1    0.00    2.47 
  -1   0  -1    2.47    1.37 
  -1   0  -1    3.29    2.19 
   1   0   1    0.27    2.47 
   0   0   1    0.00    1.64 
   0   0  -1    0.00    1.92 
   0   0  -1    0.00    1.92 
   0   0   1    0.00    1.92 
   0   0  -1    0.00    1.37 
   0   0   1    0.00    1.37 
   0   0   1    0.00    1.37 
   0   0  -1    0.00    1.10 
  -1   0   1    0.00    2.19 
   1   0  -1   -0.27    2.19 
  -1   0   1    0.55    2.19 
   1   0  -1    1.64    2.19 
  -1   0   1    0.82    2.19 
   1   0  -1    0.00    2.19 
  -1   0   1    0.00    0.27 
   1   0  -1    1.10    0.82 
  -2   0   1    1.64    2.47 
   2   0  -1    0.82    2.74 
   2   0  -1    1.37    3.01 
  -2   0   1    2.19    3.01 
   2   0  -1    0.55    1.92 
  -2   0   1    1.10    1.64 
  -2   0   1    1.10    1.37 
  -2   0   1    0.27    1.37 
   3   0  -1    0.00    1.92 
   3   0  -1    0.00    1.37 
  -3   0   1    0.82    1.64 
   3   0  -1    0.00    1.64 
   3   0  -1    0.00    1.92 
  -3   0   1    0.00    1.92 
  -3   0   1    0.27    2.19 
   4   0  -1    0.00    1.92 
   4   0  -1    0.82    1.92 
  -4   0   1   -0.27    1.92 
   4   0  -1    0.27    2.47 
   4   0  -1   -0.27    2.47 
  -4   0   1    0.00    2.47 
  -4   0   1    0.00    1.92 
   5   0  -1    0.27    1.64 
  -5   0   1    0.27    2.47 
   5   0  -1    0.27    1.64 
   5   0  -1    0.55    1.92 
  -5   0   1   -0.27    2.74 
  -5   0   1    0.00    2.19 
   6   0  -1    0.00    2.19 
  -6   0   1    0.00    2.47 
   6   0  -1    0.55    2.47 
   6   0  -1   -0.27    1.92 
  -6   0   1    0.82    3.01 
  -6   0   1    0.00    2.47 
  -7   0   1    0.00    2.19 
   7   0  -1    0.00    1.92 
  -7   0   1   -0.55    2.19 
   7   0  -1    0.27    1.92 
   7   0  -1    0.27    2.19 
  -7   0   1    0.55    2.47 
  -7   0   1   -0.55    1.92 
  -7   0   1   -0.55    1.64 
  -8   0   1    0.27    1.64 
   8   0  -1    0.00    1.64 
  -8   0   1   -0.55    2.19 
   8   0  -1    0.00    2.47 
   8   0  -1    0.82    2.47 
  -8   0   1   -0.55    2.19 
  -8   0   1    0.55    2.19 
  -8   0   1    0.27    2.74 
   9   0  -1    0.00    1.64 
  -9   0   1   -0.27    2.19 
   9   0  -1    0.00    2.19 
   9   0  -1    1.10    2.47 
  -9   0   1    0.00    3.01 
  -9   0   1    0.27    2.74 
  -9   0   1    0.00    2.19 
  10   0  -1    0.00    1.92 
 -10   0   1   -0.27    3.01 
  10   0  -1   -0.82    2.47 
  10   0  -1   -0.82    2.47 
 -10   0   1    0.00    2.74 
 -10   0   1   -0.27    3.56 
 -10   0   1    0.27    3.01 
  11   0  -1    0.00    2.74 
  11   0  -1    0.55    2.47 
 -11   0   1   -1.10    3.84 
  11   0  -1   -0.27    3.29 
  11   0  -1    0.00    3.84 
 -11   0   1    0.82    3.56 
 -11   0   1    0.00    2.74 
 -11   0   1    0.00    3.01 
  12   0  -1    0.00    2.19 
  12   0  -1    0.00    2.19 
 -12   0   1    0.27    2.74 
  12   0  -1    0.27    3.84 
  12   0  -1    0.00    3.84 
 -12   0   1   -0.27    3.01 
 -12   0   1    0.00    3.01 
 -12   0   1    0.27    2.74 
  13   0  -1    0.27    2.47 
  13   0  -1    0.00    3.56 
 -13   0   1    0.55    3.84 
  13   0  -1   -0.27    4.38 
  13   0  -1   -0.55    3.29 
 -13   0   1    0.00    3.29 
 -13   0   1    0.00    3.29 
 -13   0   1   -1.10    3.01 
  14   0  -1    0.00    3.84 
  14   0  -1    0.00    3.29 
 -14   0   1    0.27    3.29 
  14   0  -1    0.00    4.11 
  14   0  -1   -1.37    3.29 
 -14   0   1    0.82    4.93 
 -14   0   1   -0.82    4.38 
 -14   0   1   -0.55    4.38 
  15   0  -1   -1.64    2.74 
  15   0  -1   -0.82    3.29 
 -15   0   1    1.92    4.66 
  15   0  -1    0.82    3.29 
  15   0  -1    0.55    3.56 
 -15   0   1    0.00    3.56 
 -15   0   1   -2.19    5.21 
 -15   0   1    0.00    3.84 
  16   0  -1    0.00    4.38 
  16   0  -1    0.00    3.84 
 -16   0   1   -1.10    3.84 
  16   0  -1    0.55    3.56 
  16   0  -1    2.47    5.48 
 -16   0   1   -1.92    3.84 
 -16   0   1    0.82    3.84 
 -16   0   1    1.92    3.84 
  17   0  -1    0.00    3.29 
  17   0  -1    1.64    4.11 
 -17   0   1   -1.37    5.76 
  17   0  -1    0.55    3.84 
  17   0  -1    1.92    5.21 
 -17   0   1   -1.64    5.21 
 -17   0   1    1.37    4.11 
 -17   0   1    0.00    5.21 
  18   0  -1   -0.55    4.38 
  18   0  -1   -1.10    4.66 
 -18   0   1    0.82    4.38 
  18   0  -1    0.55    4.11 
  18   0  -1   -1.92    4.38 
 -18   0   1   -1.10    4.38 
 -18   0   1   -1.92    4.38 
 -18   0   1    0.82    4.93 
  19   0  -1    0.00    5.76 
  19   0  -1    0.00    3.84 
 -19   0   1   -1.10    4.66 
  19   0  -1   -1.10    4.38 
  19   0  -1    1.10    4.66 
 -19   0   1    2.47    4.66 
 -19   0   1    3.29    5.76 
 -19   0   1    0.27    4.38 
  20   0  -1   -0.27    4.66 
  20   0  -1   -0.27    4.66 
 -20   0   1   -2.19    6.58 
  20   0  -1    0.27    4.66 
  20   0  -1    0.00    4.93 
 -20   0   1    0.82    7.13 
 -20   0   1    2.19    7.40 
 -20   0   1   -0.82    4.93 
 -21   0   1   -1.64    5.48 
  21   0  -1    0.82    4.93 
  21   0  -1   -2.74    7.13 
 -21   0   1    0.00    5.21 
 -21   0   1    0.55    5.48 
 -21   0   1    1.10    5.48 
 -22   0   1    2.47    6.03 
  22   0  -1   -1.10    6.03 
  22   0  -1    0.55    6.03 
 -22   0   1    1.10    5.48 
 -22   0   1    0.00    6.03 
 -22   0   1    0.00    7.40 
 -22  -1  -1   -0.82    5.48 
 -22   1  -1    1.92    5.76 
  22   1   1    3.01    6.58 
  22  -1   1    1.92    5.21 
  22   1   1    1.10    6.58 
  22  -1   1    1.92    5.76 
 -22  -1  -1    0.55    5.48 
 -22   1  -1    0.82    7.95 
 -22  -1  -1   -0.55    7.40 
 -22   1  -1    4.38    5.76 
 -22  -1  -1    1.64    5.76 
 -22   1  -1    2.47    6.03 
  21  -1   1    0.00    6.58 
  21  -1   1    2.47    4.93 
 -21  -1  -1    1.64    5.21 
 -21   1  -1    0.00    5.21 
  21   1   1    1.92    5.48 
  21  -1   1    0.82    6.30 
  21   1   1    0.55    5.48 
  21  -1   1    0.00    5.21 
 -21  -1  -1    0.00    5.21 
 -21   1  -1   -2.74    5.48 
 -21  -1  -1    2.47    7.95 
 -21   1  -1   -0.55    5.48 
 -21  -1  -1    0.55    5.48 
 -21   1  -1    0.00    6.03 
  20  -1   1   24.66    4.93 
 -20  -1  -1   16.44    5.21 
 -20   1  -1   20.83    5.48 
  20   1   1   20.55    5.21 
  20  -1   1   16.17    4.93 
  20   1   1   21.10    5.48 
  20  -1   1   19.18    5.76 
 -20  -1  -1   20.28    5.48 
 -20   1  -1   15.89    5.76 
 -20  -1  -1   24.12    7.13 
 -20   1  -1   18.64    7.67 
 -20  -1  -1   15.35    7.67 
 -20   1  -1   21.65    5.76 
 -19   1  -1  163.88    7.67 
  19  -1   1  192.11    7.95 
  19   1   1  200.33    8.22 
  19   1   1  174.84    7.67 
 -19  -1  -1  158.68    7.95 
 -19   1  -1  165.25    7.95 
  19   1   1  156.21    7.67 
  19  -1   1  176.21    7.95 
  19   1   1  188.00    9.87 
  19  -1   1  168.54    9.32 
 -19  -1  -1  158.40    7.95 
 -19   1  -1  164.16    9.04 
 -19  -1  -1  168.81    8.50 
 -19   1  -1  166.07    8.50 
 -19  -1  -1  158.68    8.22 
 -19   1  -1  171.01    8.22 
 -18   1  -1  160.05   10.14 
  18  -1   1  201.98   11.51 
  18   1   1  207.73   12.06 
  18   1   1  199.23   11.51 
 -18  -1  -1  179.23   11.78 
 -18   1  -1  179.78   10.96 
  18   1   1  194.85   12.33 
  18  -1   1  186.08   10.96 
  18   1   1  188.00   11.51 
  18  -1   1  184.98   11.24 
 -18  -1  -1  190.19   11.51 
 -18   1  -1  184.16   11.24 
 -18  -1  -1  186.08   11.51 
 -18   1  -1  182.24   11.51 
 -18  -1  -1  178.13   10.96 
 -18   1  -1  182.79   11.24 
 -17   1  -1   28.78    4.38 
  17  -1   1   30.42    4.93 
  17   1   1   34.26    4.38 
  17   1   1   33.43    4.66 
 -17  -1  -1   28.23    4.66 
 -17   1  -1   28.78    5.21 
  17   1   1   26.86    4.66 
  17  -1   1   27.68    4.66 
  17   1   1   25.21    6.30 
  17  -1   1   27.95    4.66 
 -17  -1  -1   26.86    4.93 
 -17   1  -1   26.03    4.66 
 -17  -1  -1   23.84    4.93 
 -17   1  -1   22.47    5.76 
 -17  -1  -1   30.69    4.93 
 -17   1  -1   29.87    4.93 
 -16   1  -1   53.99    4.93 
  16  -1   1   62.21    4.93 
  16   1   1   70.98    5.48 
  16   1   1   65.77    5.48 
 -16  -1  -1   68.79    6.03 
 -16   1  -1   62.21    5.48 
  16   1   1   65.50    5.76 
  16  -1   1   61.39    5.21 
  16   1   1   58.37    5.21 
  16  -1   1   63.85    5.76 
 -16  -1  -1   58.37    5.48 
 -16   1  -1   59.74    6.30 
 -16  -1  -1   57.55    5.76 
 -16   1  -1   61.94    5.76 
 -16  -1  -1   59.19    5.48 
 -16   1  -1   56.18    5.48 
 -15   1  -1   27.13    3.84 
  15  -1   1   27.68    3.84 
  15   1   1   28.78    3.84 
  15   1   1   30.15    3.84 
 -15  -1  -1   29.60    4.66 
 -15   1  -1   24.94    4.11 
  15   1   1   23.29    5.48 
  15  -1   1   28.23    5.21 
  15   1   1   23.84    4.38 
  15  -1   1   27.68    4.38 
 -15  -1  -1   24.12    4.38 
 -15   1  -1   24.94    4.38 
  15  -1   1   26.86    4.38 
 -15  -1  -1   28.23    4.66 
 -15   1  -1   27.41    5.48 
 -15  -1  -1   24.66    5.76 
 -14   1  -1    0.00    3.01 
  14  -1   1    1.64    2.74 
  14   1   1    1.10    2.74 
 -14  -1  -1    0.27    4.66 
 -14   1  -1    1.64    3.29 
  14   1   1    1.37    3.29 
  14  -1   1    1.37    3.29 
  14   1   1   -0.27    3.84 
  14  -1   1    1.92    3.29 
 -14  -1  -1    0.27    3.56 
 -14   1  -1    1.37    4.66 
  14  -1   1    2.74    3.29 
 -14  -1  -1   -0.27    3.84 
 -14   1  -1    1.10    3.56 
 -14  -1  -1    1.64    3.56 
 -13  -1  -1   22.47    3.56 
 -13   1  -1   20.55    3.29 
  13  -1   1   22.20    3.29 
  13   1   1   22.47    3.01 
 -13  -1  -1   20.28    5.21 
 -13   1  -1   18.64    4.38 
  13   1   1   21.38    3.84 
  13  -1   1   20.55    4.11 
  13   1   1   23.02    3.84 
  13  -1   1   20.01    3.84 
 -13  -1  -1   21.10    4.66 
 -13   1  -1   18.09    3.56 
  13  -1   1   22.75    3.84 
 -13  -1  -1   20.28    4.11 
 -13   1  -1   23.57    4.11 
 -13  -1  -1   24.94    5.48 
 -12  -1  -1  213.76    9.04 
 -12   1  -1  210.47    8.77 
  12  -1   1  210.20    9.04 
  12   1   1  217.05    8.77 
 -12  -1  -1  218.97    9.32 
 -12   1  -1  188.00    9.04 
  12   1   1  224.72    9.59 
  12  -1   1  218.42    9.59 
  12   1   1  225.27    9.32 
  12  -1   1  221.16    9.32 
 -12  -1  -1  226.64   10.14 
 -12   1  -1  210.20    9.32 
  12  -1   1  219.51    9.32 
 -12  -1  -1  214.58    9.32 
 -12   1  -1  214.86    9.87 
 -12  -1  -1  227.46    9.87 
 -11  -1  -1  116.75    5.48 
 -11   1  -1  118.94    6.03 
  11  -1   1  132.64    5.76 
  11   1   1  123.05    5.21 
 -11  -1  -1  116.75    5.76 
 -11   1  -1  124.97    5.76 
  11   1   1  129.08    6.03 
  11  -1   1  116.75    5.76 
  11   1   1  129.08    6.58 
  11  -1   1  120.86    5.76 
 -11  -1  -1  123.05    6.03 
 -11   1  -1  118.12    6.30 
  11  -1   1  117.84    6.03 
 -11  -1  -1  128.26    6.30 
 -11   1  -1  122.23    6.03 
 -11  -1  -1  129.90    6.58 
 -10  -1  -1   37.00    3.56 
 -10   1  -1   33.43    3.29 
  10  -1   1   37.82    4.11 
  10   1   1   33.43    3.01 
 -10  -1  -1   33.71    3.84 
 -10   1  -1   33.16    3.56 
  10   1   1   30.97    4.11 
  10  -1   1   37.00    3.84 
  10   1   1   35.90    4.66 
  10  -1   1   37.27    3.84 
 -10  -1  -1   34.53    3.84 
 -10   1  -1   34.53    3.56 
  10  -1   1   33.98    4.66 
 -10  -1  -1   32.61    3.84 
 -10   1  -1   35.63    3.84 
 -10  -1  -1   35.08    4.66 
  -9  -1  -1   17.27    2.74 
  -9   1  -1   17.27    3.01 
   9  -1   1   18.09    2.74 
   9   1   1   17.81    2.47 
  -9  -1  -1   14.80    3.29 
  -9   1  -1   15.89    3.29 
   9   1   1   18.09    3.01 
   9  -1   1   16.17    3.84 
   9   1   1   19.18    3.01 
   9  -1   1   15.89    3.01 
  -9  -1  -1   17.54    4.11 
  -9   1  -1   19.18    3.01 
  -9  -1  -1   19.18    3.56 
   9  -1   1   19.46    3.56 
  -9   1  -1   19.73    3.56 
  -9  -1  -1   17.81    3.29 
  -8  -1  -1  467.26   16.44 
  -8   1  -1  443.41   15.89 
   8  -1   1  512.20   17.54 
  -8  -1  -1  485.89   17.27 
  -8   1  -1  481.51   17.27 
   8   1   1  462.32   16.44 
   8  -1   1  491.37   17.27 
   8   1   1  493.84   17.27 
  -8  -1  -1  448.62   16.44 
   8  -1   1  500.96   17.81 
  -8   1  -1  482.33   16.99 
  -8  -1  -1  465.34   16.99 
   8  -1   1  480.68   16.99 
  -8   1  -1  495.76   17.54 
  -8  -1  -1  496.58   17.54 
  -7  -1  -1 1043.58   16.72 
  -7   1  -1 1088.80   17.81 
   7  -1   1 1088.53   17.27 
   7   1   1 1068.80   16.44 
  -7   1  -1 1072.91   18.36 
   7   1   1 1095.11   17.54 
   7  -1   1 1130.46   18.36 
   7   1   1 1082.50   18.36 
  -7  -1  -1 1090.17   18.64 
   7  -1   1 1134.84   18.64 
  -7   1  -1 1129.36   18.64 
  -7  -1  -1 1114.84   18.36 
  -7   1  -1 1121.96   18.36 
  -7  -1  -1 1103.87   18.09 
  -6  -1  -1   23.84    3.56 
  -6   1  -1   23.57    3.01 
   6  -1   1   23.57    3.01 
   6   1   1   23.57    3.56 
  -6  -1  -1   21.10    3.56 
   6   1   1   24.12    3.01 
  -6   1  -1   25.49    3.01 
   6  -1   1   21.92    3.29 
   6   1   1   23.29    3.56 
  -6  -1  -1   25.76    3.56 
   6  -1   1   22.75    3.29 
  -6   1  -1   26.03    3.01 
  -6  -1  -1   23.29    3.29 
   6  -1   1   24.66    3.84 
  -6   1  -1   23.57    3.84 
  -6  -1  -1   26.86    3.56 
  -5   1  -1  274.87   10.69 
  -5  -1  -1  238.97   10.41 
   5  -1   1  291.86   11.51 
   5   1   1  277.61   10.96 
  -5  -1  -1  261.17   10.69 
   5   1   1  283.09   11.24 
  -5   1  -1  278.98   11.24 
   5  -1   1  282.00   10.96 
   5   1   1  281.45   11.51 
  -5  -1  -1  238.15   10.41 
   5  -1   1  283.92   11.24 
  -5   1  -1  284.74   11.24 
  -5  -1  -1  275.42   11.24 
   5  -1   1  272.41   11.24 
  -5   1  -1  273.50   11.51 
  -5  -1  -1  285.83   11.78 
  -4   1  -1  382.03   13.98 
   4  -1   1  400.66   14.52 
  -4  -1  -1  379.56   13.98 
   4   1   1  427.52   15.07 
  -4  -1  -1  384.22   14.25 
   4   1   1  408.33   14.80 
  -4   1  -1  397.92   14.52 
   4  -1   1  414.09   15.07 
   4   1   1  400.66   14.80 
  -4  -1  -1  411.62   15.07 
   4  -1   1  408.06   15.07 
  -4   1  -1  441.50   15.89 
   4  -1   1  416.01   15.35 
  -4   1  -1  422.59   15.62 
  -4  -1  -1  410.53   15.35 
   4   1   1  402.58   14.80 
  -3   1  -1 6148.04   44.67 
   3  -1   1 6126.12   71.80 
  -3   1  -1 6080.08   60.84 
   3   1   1 6158.73   42.75 
  -2   1  -1    1.37    1.92 
   2  -1   1    0.55    2.19 
  -2  -1  -1    0.27    1.92 
   2   1   1    1.10    1.64 
  -2   1  -1    0.27    1.64 
  -2  -1  -1    1.10    1.92 
   2   1   1    1.10    1.64 
  -2   1  -1    1.10    1.92 
   2   1   1    0.27    1.92 
  -2  -1  -1    1.37    1.92 
   2  -1   1    0.82    2.19 
  -2   1  -1    1.10    2.19 
   2  -1   1    0.55    1.92 
  -2   1  -1    3.84    2.47 
  -2  -1  -1    0.27    1.64 
   2   1   1    0.00    1.92 
  -1   1  -1   68.24    3.84 
   1  -1   1   70.70    4.11 
  -1  -1  -1   64.95    4.11 
   1   1   1   66.87    4.11 
  -1   1  -1   72.35    4.93 
   1  -1   1   68.79    5.21 
   1   1   1   71.25    4.66 
  -1  -1  -1   65.77    4.66 
  -1  -1  -1   80.30    4.66 
   1  -1   1   41.11    3.56 
  -1  -1  -1   76.46    4.66 
   1  -1   1   70.98    4.66 
  -1   1  -1   74.54    4.66 
  -1  -1  -1   70.70    4.11 
   1   1   1   71.53    4.38 
   0  -1   1  353.52   13.15 
   0   1  -1  351.88   13.70 
   0  -1   1  333.79   13.43 
   0  -1  -1  327.49   12.61 
   0   1   1  343.66   13.15 
   0   1  -1  341.19   13.43 
   0  -1   1  335.44   12.88 
   0  -1  -1  334.89   12.88 
   0   1   1  357.91   13.43 
   0   1  -1  365.58   13.98 
   0   1   1  353.80   13.70 
   0  -1  -1  342.84   13.43 
  -1   1   1    2.19    1.92 
   1  -1  -1    4.11    2.19 
  -1  -1   1    3.56    2.47 
   1   1  -1    1.37    2.47 
   1  -1  -1    2.19    1.64 
  -1  -1   1    1.64    1.64 
   1   1  -1    3.01    1.92 
   1  -1  -1    2.74    1.64 
  -1  -1   1    2.47    3.01 
   1   1  -1    1.92    3.29 
   1  -1  -1    1.64    1.92 
  -1   1   1    3.01    1.92 
   1  -1  -1    1.64    2.47 
  -1  -1   1    2.47    3.01 
   1   1  -1    2.74    3.01 
  -1   1   1    2.19    2.19 
  -2   1   1 1352.99   20.01 
   2   1  -1 1357.92   20.83 
   2   1  -1 1369.98   20.83 
  -2   1   1 1317.09   20.28 
  -2  -1   1 1340.11   21.65 
  -3   1   1 1889.03   24.39 
   3   1  -1 1910.95   26.58 
   3   1  -1 1966.86   25.76 
  -3   1   1 1894.24   29.87 
  -3  -1   1 1954.53   25.49 
  -4   1   1   84.41    4.66 
   4  -1  -1   88.24    4.93 
   4   1  -1   76.46    4.66 
  -4  -1   1   91.81    5.21 
  -4  -1   1   78.65    4.66 
  -4   1   1   75.91    4.38 
   4   1  -1   87.70    4.93 
   4  -1  -1   74.54    4.11 
   4   1  -1   84.41    5.21 
  -4  -1   1   91.53    4.93 
   4  -1  -1   83.04    4.66 
  -4   1   1   90.16    5.21 
   4  -1  -1   83.59    4.93 
  -4   1   1   81.12    5.21 
  -4  -1   1   84.41    4.93 
   4   1  -1   85.23    4.66 
  -5   1   1   63.31    4.38 
   5  -1  -1   62.48    3.84 
   5   1  -1   62.21    3.84 
  -5  -1   1   62.76    4.66 
  -5   1   1   54.26    3.84 
   5   1  -1   69.61    4.38 
   5  -1  -1   68.51    4.11 
   5   1  -1   67.14    4.38 
  -5  -1   1   60.84    4.66 
   5  -1  -1   68.24    4.38 
  -5   1   1   68.51    4.66 
   5  -1  -1   63.85    4.38 
  -5   1   1   69.33    4.38 
  -5  -1   1   64.95    4.11 
   5   1  -1   68.51    4.38 
   6   1  -1    0.82    1.92 
  -6   1   1    0.55    1.64 
   6  -1  -1    0.27    1.92 
   6   1  -1    0.82    1.37 
  -6  -1   1    1.10    2.74 
  -6   1   1    0.00    2.19 
   6   1  -1    0.82    2.74 
   6  -1  -1    0.27    2.19 
   6   1  -1    1.64    2.19 
  -6  -1   1    0.00    2.19 
   6  -1  -1   -0.27    2.47 
  -6   1   1    0.55    2.47 
   6  -1  -1    0.82    1.92 
  -6   1   1    0.00    2.74 
  -6  -1   1    0.27    2.19 
  -7   1   1  127.16    5.48 
   7   1  -1  137.57    5.76 
   7  -1  -1  140.86    5.48 
   7   1  -1  117.57    5.21 
  -7  -1   1  123.60    5.48 
  -7   1   1  132.64    6.03 
   7   1  -1  133.74    6.03 
   7  -1  -1  132.09    5.76 
   7   1  -1  134.83    6.03 
  -7  -1   1  148.26    6.30 
   7  -1  -1  136.75    6.03 
  -7   1   1  135.65    6.03 
  -7  -1   1  132.91    6.03 
   7  -1  -1  127.98    5.76 
  -7   1   1  137.85    6.30 
  -7  -1   1  133.46    5.76 
  -8   1   1  141.41    6.03 
   8   1  -1  147.17    5.76 
   8  -1  -1  155.93    6.30 
   8   1  -1  144.97    5.76 
  -8  -1   1  146.34    6.30 
  -8   1   1  149.91    6.30 
   8   1  -1  154.56    6.30 
   8  -1  -1  161.96    6.30 
   8   1  -1  152.37    6.30 
  -8  -1   1  159.50    6.58 
   8  -1  -1  154.84    6.30 
  -8   1   1  155.11    6.58 
  -8  -1   1  150.18    6.58 
   8  -1  -1  151.82    6.30 
  -8   1   1  155.93    6.58 
  -8  -1   1  141.41    6.30 
  -9   1   1   -0.27    2.47 
   9   1  -1    0.00    1.92 
   9  -1  -1    0.27    2.19 
   9   1  -1    0.00    2.19 
  -9  -1   1    2.19    3.56 
  -9   1   1    0.00    2.19 
   9   1  -1    0.27    3.56 
   9  -1  -1    0.00    2.47 
   9   1  -1    0.00    3.01 
   9  -1  -1   -0.27    3.56 
  -9  -1   1   -1.10    2.47 
  -9   1   1   -0.55    3.56 
   9  -1  -1    0.82    2.19 
  -9  -1   1   -0.27    3.29 
  -9   1   1   -0.82    3.29 
  -9  -1   1    0.00    2.19 
 -10   1   1   29.60    3.29 
  10   1  -1   32.34    3.56 
  10  -1  -1   30.42    3.29 
  10   1  -1   29.60    3.29 
 -10  -1   1   27.13    4.38 
 -10   1   1   27.13    3.56 
  10   1  -1   31.24    3.84 
  10  -1  -1   29.60    3.84 
  10   1  -1   32.34    4.66 
  10  -1  -1   32.61    3.84 
 -10  -1   1   30.15    3.84 
 -10   1   1   29.60    4.66 
  10  -1  -1   29.32    3.56 
 -10  -1   1   32.61    3.84 
 -10   1   1   30.42    4.38 
 -10  -1   1   30.69    3.56 
 -11   1   1  132.91    6.03 
  11   1  -1  141.68    6.03 
  11  -1  -1  138.12    6.58 
  11   1  -1  129.63    5.76 
 -11  -1   1  123.60    5.76 
 -11   1   1  120.58    6.30 
  11   1  -1  134.28    6.03 
  11  -1  -1  123.87    6.03 
  11   1  -1  131.00    6.30 
  11  -1  -1  140.86    6.58 
 -11  -1   1  135.65    6.30 
 -11   1   1  124.42    6.58 
  11  -1  -1  124.69    6.58 
 -11  -1   1  128.26    6.58 
 -11   1   1  139.49    7.13 
 -11  -1   1  127.71    6.03 
 -12   1   1    4.38    3.56 
  12   1  -1    3.84    2.74 
  12  -1  -1    4.38    3.01 
  12   1  -1    3.01    2.74 
 -12  -1   1    4.11    3.01 
 -12   1   1    4.66    3.01 
  12   1  -1    4.38    3.01 
  12  -1  -1    4.66    3.84 
  12   1  -1    3.56    4.11 
  12  -1  -1    3.56    4.11 
 -12  -1   1    3.84    3.29 
 -12   1   1    4.38    3.29 
  12  -1  -1    3.84    3.01 
 -12  -1   1    2.74    3.84 
 -12   1   1    2.74    3.56 
 -12  -1   1    4.11    3.01 
 -13   1   1   13.43    4.38 
  13   1  -1   16.44    3.56 
  13  -1  -1   16.17    3.29 
  13   1  -1   13.98    3.01 
 -13  -1   1   15.62    4.38 
 -13   1   1   14.80    3.56 
  13   1  -1   15.62    3.56 
  13  -1  -1   16.44    3.29 
  13   1  -1   16.99    3.84 
  13  -1  -1   17.54    4.93 
 -13  -1   1   13.98    3.84 
 -13   1   1   15.62    3.84 
  13  -1  -1   17.27    3.56 
 -13  -1   1   13.98    3.84 
 -13   1   1   15.62    3.56 
 -13  -1   1   13.70    4.38 
 -14   1   1   26.58    4.66 
  14  -1  -1   31.52    4.38 
  14   1  -1   30.97    4.11 
  14   1  -1   29.32    3.84 
 -14  -1   1   26.58    4.11 
 -14   1   1   26.86    4.11 
  14   1  -1   31.24    4.11 
  14  -1  -1   27.41    3.84 
  14   1  -1   30.15    5.76 
  14  -1  -1   26.86    4.93 
 -14  -1   1   31.52    4.38 
 -14   1   1   28.23    5.48 
 -14  -1   1   31.24    4.38 
 -14   1   1   27.41    5.48 
 -14  -1   1   26.03    4.11 
 -14   1   1   30.69    4.11 
  15  -1  -1    0.27    3.56 
  15   1  -1    0.27    3.29 
  15   1  -1   -0.27    3.29 
 -15  -1   1    1.10    3.84 
 -15   1   1    0.82    3.56 
  15   1  -1    0.00    3.56 
  15  -1  -1    0.00    3.29 
  15   1  -1    0.27    3.56 
  15  -1  -1   -2.19    4.66 
 -15  -1   1    0.00    4.93 
 -15   1   1    0.55    3.84 
 -15  -1   1    0.00    3.84 
 -15   1   1    0.00    3.84 
 -15  -1   1    1.37    3.56 
 -15   1   1    0.82    3.56 
  16  -1  -1   51.80    4.66 
  16   1  -1   48.78    4.93 
  16   1  -1   50.15    4.93 
  16  -1  -1   41.66    4.93 
 -16  -1   1   43.57    6.03 
 -16   1   1   40.01    6.03 
  16   1  -1   46.86    4.93 
  16  -1  -1   45.49    4.66 
  16   1  -1   43.30    4.93 
  16  -1  -1   44.12    5.76 
 -16  -1   1   40.01    6.03 
 -16   1   1   42.48    4.93 
 -16  -1   1   46.04    5.21 
 -16   1   1   50.15    6.03 
 -16  -1   1   43.30    4.93 
 -16   1   1   47.41    4.93 
  17  -1  -1   28.23    5.21 
  17   1  -1   27.13    4.11 
  17   1  -1   28.50    4.93 
  17  -1  -1   24.66    4.93 
 -17  -1   1   26.58    4.93 
 -17   1   1   27.41    4.66 
  17   1  -1   28.78    4.66 
  17  -1  -1   23.84    4.93 
  17   1  -1   24.94    4.66 
  17  -1  -1   26.58    5.76 
 -17  -1   1   26.31    4.93 
 -17   1   1   27.95    4.93 
 -17  -1   1   31.24    5.21 
 -17   1   1   26.03    4.93 
 -17  -1   1   27.68    4.93 
 -17   1   1   29.05    4.66 
  18  -1  -1   58.92    6.30 
  18   1  -1   62.76    5.76 
  18   1  -1   58.65    6.03 
  18  -1  -1   61.66    6.85 
 -18  -1   1   52.34    6.03 
 -18   1   1   43.30    5.48 
  18   1  -1   50.43    5.76 
  18  -1  -1   64.13    7.40 
  18   1  -1   51.25    6.03 
  18  -1  -1   54.81    7.40 
 -18  -1   1   46.86    5.48 
 -18   1   1   53.99    6.30 
 -18  -1   1   52.34    6.30 
 -18   1   1   43.30    6.85 
 -18  -1   1   53.71    6.03 
 -18   1   1   53.17    6.03 
  19  -1  -1   -0.82    4.11 
  19   1  -1    1.10    4.11 
  19   1  -1    1.64    3.84 
  19  -1  -1    0.55    3.84 
 -19  -1   1    3.29    4.93 
 -19   1   1    3.84    6.30 
  19   1  -1    1.10    4.38 
  19  -1  -1    2.47    4.38 
  19   1  -1   -0.82    6.03 
  19  -1  -1   -0.27    6.58 
 -19  -1   1    1.92    4.66 
 -19   1   1    1.92    5.21 
 -19  -1   1    0.82    4.93 
 -19   1   1   -1.37    4.66 
 -19  -1   1    0.82    5.21 
 -19   1   1    1.10    5.21 
  20  -1  -1  139.22    8.22 
  20  -1  -1  144.42    7.13 
 -20  -1   1  110.44    7.40 
 -20   1   1  116.47    7.40 
  20   1  -1  127.71    7.13 
  20  -1  -1  118.39    6.85 
  20   1  -1  136.48    7.40 
  20  -1  -1  113.73    8.22 
 -20  -1   1  110.17    7.13 
 -20   1   1  123.32    7.67 
 -20  -1   1  117.84    7.40 
 -20   1   1  117.29    7.40 
 -20  -1   1  114.83    7.40 
 -20   1   1  119.49    7.40 
  21  -1  -1   26.31    5.76 
  21  -1  -1   22.20    6.03 
 -21  -1   1   11.24    7.40 
 -21   1   1   17.81    6.03 
  21   1  -1   24.12    5.48 
  21  -1  -1   20.28    5.48 
  21   1  -1   24.94    5.76 
  21  -1  -1   20.01    6.03 
 -21  -1   1   18.09    6.85 
 -21   1   1   18.36    5.76 
 -21  -1   1   20.55    6.03 
 -21   1   1   22.20    7.95 
 -21  -1   1   19.73    7.13 
 -21   1   1   25.21    6.03 
 -22   1   1   56.18    7.13 
 -22  -1   1   53.99    7.13 
  22   1  -1   57.00    6.30 
  22  -1  -1   53.71    6.58 
  22   1  -1   51.80    7.95 
  22  -1  -1   50.97    6.58 
 -22  -1   1   52.89    7.67 
 -22   1   1   52.89    8.22 
 -22  -1   1   50.70    7.13 
 -22   1   1   57.55    7.13 
 -22  -1   1   44.40    7.67 
 -22   1   1   57.82    6.85 
  22  -2   1    3.84    6.58 
  22  -2   1    2.19    5.48 
 -22  -2  -1   -1.37    7.40 
 -22   2  -1    6.30    7.95 
  22   2   1    2.19    5.21 
  22  -2   1    5.48    6.03 
  22   2   1    2.19    7.40 
  22  -2   1    1.64    5.76 
 -22  -2  -1    3.56    5.76 
 -22   2  -1    2.19    7.13 
 -22  -2  -1    1.92    6.03 
 -22   2  -1    1.64    6.85 
 -22  -2  -1    0.27    7.67 
 -22   2  -1    0.00    7.95 
 -21   2  -1    7.40    6.58 
  21  -2   1   10.41    6.85 
 -21  -2  -1   12.33    5.48 
 -21   2  -1   10.69    7.67 
  21   2   1   11.24    5.21 
  21  -2   1   12.61    5.48 
  21   2   1   12.33    5.48 
  21  -2   1   10.14    5.48 
 -21  -2  -1   11.51    5.76 
 -21   2  -1   11.78    5.48 
 -21  -2  -1   12.33    6.03 
 -21   2  -1   12.61    6.03 
 -21  -2  -1   15.07    5.76 
 -21   2  -1   10.41    7.40 
 -20   2  -1   12.61    4.93 
  20  -2   1   12.33    5.76 
 -20  -2  -1   11.24    5.21 
 -20   2  -1    9.04    6.85 
  20   2   1   11.51    6.03 
  20  -2   1   11.51    6.30 
  20   2   1    8.77    6.58 
  20  -2   1   11.24    5.21 
 -20  -2  -1   12.33    5.48 
 -20   2  -1   11.51    6.58 
 -20  -2  -1   12.33    5.76 
 -20   2  -1   10.41    7.13 
 -20  -2  -1    6.58    5.76 
 -20   2  -1   10.14    5.76 
 -19   2  -1    9.32    6.03 
  19  -2   1    9.32    4.66 
 -19  -2  -1    9.04    4.93 
 -19   2  -1    4.93    5.76 
  19   2   1   12.61    5.48 
  19  -2   1    9.59    4.66 
  19   2   1   11.24    5.21 
  19  -2   1   10.14    4.93 
 -19  -2  -1    9.87    4.93 
 -19   2  -1    9.59    4.93 
 -19  -2  -1    6.30    5.21 
 -19   2  -1   13.15    5.21 
 -19  -2  -1    7.40    4.93 
 -19   2  -1    8.50    5.21 
 -18   2  -1   33.16    4.66 
  18  -2   1   35.90    4.93 
 -18  -2  -1   24.94    6.85 
 -18   2  -1   28.23    5.48 
  18   2   1   32.61    4.93 
  18  -2   1   31.24    5.21 
  18   2   1   32.61    6.58 
  18  -2   1   33.98    5.21 
 -18  -2  -1   27.41    5.21 
 -18   2  -1   30.15    6.30 
  18  -2   1   32.06    5.21 
 -18  -2  -1   30.97    5.48 
 -18   2  -1   27.95    5.76 
 -18  -2  -1   28.23    6.03 
 -17   2  -1  311.32   16.17 
  17  -2   1  346.13   16.99 
 -17  -2  -1  309.95   15.62 
 -17   2  -1  343.11   16.99 
  17   2   1  351.33   17.27 
  17  -2   1  342.01   16.72 
  17   2   1  330.23   16.72 
  17  -2   1  326.67   16.44 
 -17  -2  -1  320.91   16.17 
 -17   2  -1  303.65   15.62 
  17  -2   1  321.19   16.17 
 -17  -2  -1  328.59   16.72 
 -17   2  -1  309.40   15.89 
 -17  -2  -1  323.93   16.44 
 -16   2  -1   17.54    3.84 
  16  -2   1   18.09    5.21 
  16   2   1   18.91    5.76 
  16   2   1    2.47    5.21 
 -16  -2  -1   13.70    4.38 
 -16   2  -1   13.15    4.11 
  16   2   1   10.14    5.21 
  16  -2   1   19.46    4.11 
  16   2   1   19.46    4.66 
  16  -2   1   16.99    4.11 
 -16  -2  -1   14.25    5.48 
 -16   2  -1   17.54    4.38 
  16  -2   1   15.62    4.38 
 -16  -2  -1   13.70    5.76 
 -16   2  -1   16.99    4.66 
 -16  -2  -1   20.28    6.03 
 -15   2  -1   52.62    4.66 
  15  -2   1   49.06    4.93 
  15   2   1   63.31    5.76 
 -15  -2  -1   47.96    6.30 
 -15   2  -1   52.07    4.93 
  15   2   1   56.73    4.93 
  15  -2   1   58.10    5.48 
  15   2   1   64.13    5.48 
  15  -2   1   57.00    5.76 
 -15  -2  -1   50.97    6.03 
 -15   2  -1   60.29    6.30 
  15  -2   1   52.34    4.93 
 -15  -2  -1   50.43    6.58 
 -15   2  -1   53.99    6.30 
 -15  -2  -1   53.99    5.21 
 -14   2  -1    4.11    4.11 
  14  -2   1    7.40    3.01 
  14   2   1    6.30    4.66 
  14   2   1    0.00    4.11 
 -14  -2  -1    5.48    3.84 
 -14   2  -1    3.56    4.38 
  14   2   1    7.13    3.56 
  14  -2   1    5.76    4.66 
  14   2   1    6.85    4.93 
  14  -2   1    5.21    4.66 
 -14  -2  -1    6.58    3.84 
 -14   2  -1    7.67    4.66 
  14  -2   1    3.29    4.38 
 -14  -2  -1    5.48    3.84 
 -14   2  -1    3.56    3.84 
 -14  -2  -1    6.30    3.84 
 -13   2  -1  118.12    6.30 
  13  -2   1  114.55    6.03 
  13   2   1  127.98    6.85 
 -13  -2  -1  118.66    6.85 
 -13   2  -1  110.72    6.85 
  13   2   1  118.39    7.40 
  13  -2   1  112.91    6.85 
  13   2   1  116.47    7.67 
  13  -2   1  117.84    6.58 
 -13  -2  -1  115.65    6.85 
 -13   2  -1  113.73    6.58 
  13  -2   1  112.36    6.58 
 -13  -2  -1  114.00    6.85 
 -13   2  -1  117.02    6.85 
 -13  -2  -1  107.70    6.58 
 -12   2  -1   75.36    5.21 
  12  -2   1   70.16    5.21 
  12   2   1   78.38    5.21 
 -12  -2  -1   78.38    6.58 
 -12   2  -1   69.88    4.93 
  12   2   1   75.09    4.93 
  12  -2   1   70.16    5.48 
  12   2   1   67.42    6.03 
 -12  -2  -1   66.87    6.03 
  12  -2   1   69.88    4.93 
 -12   2  -1   68.51    4.93 
 -12  -2  -1   71.53    5.21 
  12  -2   1   66.32    4.93 
 -12   2  -1   66.32    5.21 
 -12  -2  -1   66.87    6.03 
 -11   2  -1   57.55    4.38 
  11  -2   1   64.95    4.38 
  11   2   1   67.69    4.38 
 -11  -2  -1   58.65    4.66 
 -11   2  -1   52.89    4.66 
  11   2   1   63.58    4.66 
  11  -2   1   61.94    4.66 
  11   2   1   65.77    4.93 
 -11  -2  -1   69.06    4.93 
  11  -2   1   65.50    5.21 
 -11   2  -1   64.95    5.48 
 -11  -2  -1   57.28    5.21 
  11  -2   1   60.29    5.21 
 -11   2  -1   60.84    4.93 
 -11  -2  -1   56.18    5.48 
 -10   2  -1  324.48    9.32 
  10   2   1  357.36    9.32 
 -10  -2  -1  293.78    9.59 
 -10   2  -1  323.11    9.59 
  10   2   1  342.29   10.14 
  10  -2   1  317.08    9.04 
  10   2   1  340.64    9.87 
 -10  -2  -1  307.48    9.32 
  10  -2   1  332.42   10.14 
 -10   2  -1  318.17    9.32 
 -10  -2  -1  320.64    9.59 
  10  -2   1  309.95    9.32 
 -10   2  -1  324.20   10.41 
 -10  -2  -1  320.36   10.14 
  -9   2  -1   72.90    4.66 
   9  -2   1   80.57    4.66 
  -9  -2  -1   78.10    4.93 
  -9   2  -1   80.02    5.21 
   9   2   1   83.59    4.93 
   9  -2   1   78.38    4.93 
   9   2   1   69.88    5.48 
  -9  -2  -1   76.73    5.48 
   9  -2   1   83.59    4.93 
  -9   2  -1   88.79    6.03 
  -9  -2  -1   79.47    5.48 
   9  -2   1   80.30    4.93 
  -9   2  -1   77.28    5.48 
  -9  -2  -1   79.47    4.93 
  -8   2  -1  133.74    6.58 
   8  -2   1  137.85    6.58 
  -8  -2  -1  127.98    6.58 
   8   2   1  139.49    6.58 
  -8   2  -1  118.94    6.58 
   8  -2   1  125.52    6.30 
   8   2   1  147.44    7.13 
  -8  -2  -1  134.56    7.13 
   8  -2   1  140.31    7.13 
  -8   2  -1  144.15    7.40 
  -8  -2  -1  141.68    7.13 
   8  -2   1  135.65    6.85 
  -8   2  -1  140.59    7.13 
  -8  -2  -1  141.96    7.13 
  -7   2  -1   37.54    3.56 
   7  -2   1   36.45    3.56 
  -7  -2  -1   41.93    3.84 
   7   2   1   30.97    3.84 
  -7   2  -1   37.27    3.84 
   7  -2   1   36.17    3.29 
   7   2   1   40.83    3.84 
  -7  -2  -1   37.27    3.84 
   7  -2   1   37.82    3.56 
  -7   2  -1   38.37    3.84 
   7  -2   1   36.72    3.56 
  -7   2  -1   43.03    4.11 
  -7  -2  -1   36.72    3.84 
   7   2   1   37.54    3.84 
  -6   2  -1    1.92    3.01 
   6  -2   1    3.29    2.47 
  -6  -2  -1    3.29    2.47 
   6   2   1    1.92    2.19 
  -6   2  -1    2.19    2.47 
   6  -2   1    2.19    2.47 
   6   2   1    2.47    3.29 
  -6  -2  -1    4.11    3.29 
   6  -2   1    2.47    2.47 
  -6   2  -1    3.01    2.19 
   6  -2   1    2.19    3.29 
  -6   2  -1    2.19    3.29 
  -6  -2  -1    1.37    3.29 
   6   2   1   12.33    2.74 
  -5   2  -1   32.06    3.01 
   5  -2   1   36.45    3.29 
  -5  -2  -1   33.43    3.29 
   5   2   1   34.80    3.84 
  -5   2  -1   33.43    3.29 
   5  -2   1   34.80    3.56 
   5   2   1   34.26    4.11 
  -5  -2  -1   33.71    4.11 
   5  -2   1   35.08    3.84 
  -5   2  -1   33.43    3.29 
   5  -2   1   37.00    3.56 
  -5   2  -1   34.53    3.56 
  -5  -2  -1   35.35    3.56 
   5   2   1   28.78    3.56 
  -4  -2  -1  237.60    9.59 
  -4   2  -1  221.16    9.32 
   4  -2   1  236.51    9.87 
  -4  -2  -1  200.88    7.67 
  -4   2  -1  240.34   10.14 
  -4  -2  -1  224.72    9.59 
   4   2   1  237.88    9.87 
  -4   2  -1  235.41    9.87 
   4   2   1  231.57    9.87 
  -4  -2  -1  238.70   10.41 
   4  -2   1  223.63    9.59 
  -4   2  -1  249.11   10.41 
   4  -2   1  250.76   10.96 
  -4   2  -1  249.66   10.41 
  -4  -2  -1  240.89   10.41 
   4   2   1  245.82   10.41 
  -3  -2  -1  211.29    7.13 
  -3   2  -1  197.04    6.85 
   3  -2   1  192.38    6.85 
  -3   2  -1  212.94    7.13 
  -3  -2  -1  208.28    7.13 
   3   2   1  220.06    7.40 
   3   2   1  221.98    9.87 
  -3  -2  -1  219.79    7.40 
   3  -2   1  220.34    7.40 
  -3   2  -1  223.35    9.87 
   3  -2   1  225.00   10.14 
  -3   2  -1  227.74    9.87 
  -3  -2  -1  209.65    7.40 
   3   2   1  224.45    9.87 
   2   2   1   25.21    3.29 
  -2  -2  -1   27.13    3.84 
  -2   2  -1   27.41    3.01 
   2  -2   1   26.58    3.01 
   2  -2   1   24.66    3.29 
  -2   2  -1   23.84    3.01 
  -2  -2  -1   25.76    3.29 
   2   2   1   25.21    2.74 
   2   2   1   27.95    3.29 
  -2  -2  -1   26.03    3.29 
   2  -2   1   25.76    3.01 
  -2   2  -1   27.41    3.01 
   2  -2   1   25.76    3.29 
  -2   2  -1   28.23    3.29 
  -2  -2  -1   25.76    3.56 
   2   2   1   26.31    3.56 
   1   2   1  873.95   14.80 
  -1  -2  -1  883.81   15.07 
  -1   2  -1  864.35   15.35 
   1  -2   1  919.44   15.62 
   1  -2   1  895.87   16.72 
  -1   2  -1  887.37   16.44 
   1   2   1  942.73   15.89 
   1  -2   1  904.09   16.99 
  -1  -2  -1  896.97   16.44 
  -1  -2  -1  902.72   16.44 
   1  -2   1  911.49   16.72 
  -1  -2  -1  895.60   16.44 
   1   2   1  919.44   16.44 
   0   2   1    8.50    2.19 
   0  -2  -1    9.32    2.19 
   0   2  -1    9.04    2.19 
   0  -2   1    9.04    2.19 
   0  -2   1    8.77    2.74 
   0   2  -1    8.22    2.47 
   0  -2  -1    7.67    2.74 
   0   2   1    9.87    3.01 
   0   2  -1    8.22    2.47 
   0  -2   1   10.69    2.47 
   0  -2  -1    7.67    2.47 
   0   2   1    9.87    2.19 
   0  -2   1   10.96    3.01 
   0   2  -1   10.41    2.74 
   0  -2  -1    9.32    2.74 
   0   2   1    9.32    2.74 
  -1   2   1    0.55    1.92 
   1  -2  -1    1.64    2.19 
   1   2  -1    1.10    1.64 
  -1  -2   1    0.82    1.64 
  -1  -2   1    2.19    1.92 
   1   2  -1    2.47    2.47 
   1  -2  -1    1.10    2.19 
  -1   2   1    1.10    1.64 
   1   2  -1    0.82    2.19 
  -1  -2   1    1.10    2.19 
   1  -2  -1    0.55    2.47 
  -1   2   1    1.37    2.19 
   1  -2  -1    1.37    2.47 
  -1  -2   1    0.82    2.19 
  -1   2   1    1.37    1.92 
   1   2  -1    0.55    2.47 
   2   2  -1 2602.66   31.24 
   2   2  -1 2629.79   32.34 
   2  -2  -1 2606.22   32.06 
  -2   2   1 2616.08   33.43 
  -2  -2   1 2637.46   33.16 
  -3   2   1  655.25   13.15 
   3  -2  -1  670.60   12.88 
   3   2  -1  656.35   12.61 
  -3  -2   1  659.91   13.43 
  -3  -2   1  663.75   13.70 
   3  -2  -1  643.74   13.43 
  -3  -2   1  673.62   13.98 
  -4   2   1  582.63   19.46 
   4  -2  -1  602.64   11.51 
   4   2  -1  603.46   11.51 
  -4  -2   1  603.46   11.51 
  -4  -2   1  599.62   12.06 
   4   2  -1  586.47   20.01 
   4  -2  -1  615.52   12.06 
   4   2  -1  619.35   13.15 
  -4  -2   1  565.91   19.73 
  -4   2   1  604.01   12.06 
   4  -2  -1  621.00   13.70 
  -4   2   1  612.50   12.61 
  -4  -2   1  530.01   18.91 
   4   2  -1  617.44   13.43 
   5   2  -1 1984.67   24.39 
  -5  -2   1 2062.50   25.76 
  -5  -2   1 2036.47   27.95 
   5  -2  -1 2040.03   26.03 
   5  -2  -1 2071.82   28.23 
   5  -2  -1 2013.72   27.95 
  -5   2   1 2042.22   27.68 
   5   2  -1 2068.81   27.68 
  -6   2   1  185.81    6.85 
   6  -2  -1  202.52    7.13 
   6   2  -1  180.87    6.30 
  -6  -2   1  189.09    6.30 
  -6   2   1  210.20    7.40 
   6   2  -1  202.80    7.13 
   6  -2  -1  179.78    6.58 
   6   2  -1  173.20    7.13 
  -6  -2   1  183.34    6.85 
   6  -2  -1  183.07    7.13 
  -6   2   1  188.82    7.13 
   6  -2  -1  191.29    7.40 
  -6   2   1  201.70    7.40 
  -6  -2   1  190.46    6.85 
   6   2  -1  187.72    7.40 
   7   2  -1  422.59   15.07 
  -7   2   1  418.20   15.07 
   7  -2  -1  430.53   15.35 
   7   2  -1  411.90   14.52 
  -7  -2   1  397.10   14.52 
  -7   2   1  436.29   15.89 
   7   2  -1  431.08   15.62 
   7  -2  -1  429.16   15.35 
   7   2  -1  428.34   15.62 
  -7  -2   1  413.27   15.35 
   7  -2  -1  423.13   15.62 
  -7   2   1  408.33   15.07 
   7  -2  -1  414.64   15.35 
  -7   2   1  410.53   15.35 
  -7  -2   1  403.68   15.07 
   7   2  -1  464.24   17.27 
  -8   2   1 1485.90   26.03 
   8   2  -1 1488.37   25.76 
  -8   2   1 1439.31   26.03 
   8   2  -1 1445.62   26.03 
   8   2  -1 1442.60   26.03 
  -8  -2   1 1445.34   26.31 
   8  -2  -1 1445.89   26.31 
  -8  -2   1 1467.27   26.31 
   8   2  -1 1500.70   26.58 
  -9   2   1    1.92    3.29 
   9   2  -1    0.00    1.64 
   9  -2  -1   -0.55    3.29 
   9   2  -1    0.00    1.64 
  -9  -2   1   -0.55    2.47 
  -9   2   1   -0.27    3.01 
   9   2  -1    0.27    2.47 
   9  -2  -1   -0.55    2.74 
   9   2  -1    0.55    2.74 
  -9  -2   1    0.00    3.29 
   9  -2  -1    0.55    3.56 
  -9   2   1    0.27    3.56 
   9  -2  -1    0.00    2.47 
  -9   2   1   -0.27    3.01 
  -9  -2   1    0.00    2.47 
 -10   2   1  261.44    8.50 
  10   2  -1  272.95    8.22 
  10  -2  -1  282.27    8.77 
  10   2  -1  257.88    7.95 
 -10  -2   1  239.25    8.22 
 -10   2   1  228.56    7.95 
  10   2  -1  271.58    8.50 
  10  -2  -1  261.72    8.50 
  10   2  -1  255.41    8.50 
 -10  -2   1  254.04    8.50 
  10  -2  -1  263.36    8.77 
 -10   2   1  266.10    8.77 
 -10  -2   1  258.43    9.04 
  10  -2  -1  257.61    8.50 
 -10   2   1  259.53    8.77 
 -10  -2   1  260.90    9.04 
 -11   2   1    0.00    2.47 
  11   2  -1    0.27    1.92 
  11  -2  -1    0.00    3.56 
  11   2  -1    0.82    2.19 
 -11  -2   1    0.00    3.01 
 -11   2   1    0.82    2.47 
  11   2  -1    1.37    3.84 
  11  -2  -1    0.00    2.19 
  11   2  -1    1.10    3.01 
 -11  -2   1    1.37    3.29 
  11  -2  -1    0.55    3.01 
 -11   2   1    1.10    3.56 
 -11  -2   1    1.64    3.01 
  11  -2  -1    0.82    2.74 
 -11   2   1    0.00    4.11 
 -11  -2   1    1.92    3.01 
 -12   2   1  112.63    6.30 
  12   2  -1  123.60    6.30 
  12  -2  -1  114.55    6.85 
  12   2  -1  103.87    4.93 
 -12  -2   1  104.69    5.76 
 -12   2   1  109.07    6.30 
  12   2  -1  103.32    6.03 
  12  -2  -1  109.35    5.76 
  12   2  -1  107.43    6.03 
 -12  -2   1  116.47    6.85 
  12  -2  -1  114.55    7.40 
 -12   2   1  119.21    7.67 
 -12  -2   1  111.81    6.58 
  12  -2  -1  113.46    6.58 
 -12   2   1  117.02    6.85 
 -12  -2   1  108.52    6.03 
 -13   2   1    6.03    3.01 
  13  -2  -1    7.40    3.84 
  13   2  -1    7.13    3.01 
  13   2  -1    6.03    2.74 
 -13  -2   1    3.01    4.38 
 -13   2   1    4.93    3.01 
  13   2  -1    5.48    3.84 
  13  -2  -1    6.58    3.01 
  13   2  -1    8.22    4.93 
  13  -2  -1    6.58    3.56 
 -13  -2   1    7.13    4.66 
 -13   2   1    6.85    4.93 
  13  -2  -1    4.66    3.29 
 -13  -2   1    8.50    3.56 
 -13   2   1    6.30    3.56 
 -13  -2   1    7.40    3.56 
 -14   2   1  159.22    7.95 
  14  -2  -1  164.16    8.22 
  14   2  -1  167.99    7.95 
  14   2  -1  169.36    7.95 
 -14  -2   1  153.19    7.95 
 -14   2   1  159.22    7.95 
  14   2  -1  168.81    8.22 
  14  -2  -1  155.93    7.67 
  14   2  -1  171.56    8.50 
  14  -2  -1  170.73    8.50 
 -14  -2   1  153.47    8.77 
 -14   2   1  169.09    9.04 
  14  -2  -1  164.70    8.50 
 -14  -2   1  163.06    8.22 
 -14   2   1  172.38    8.77 
 -14  -2   1  159.77    8.22 
 -15   2   1   43.57    4.38 
  15  -2  -1   45.22    4.38 
  15   2  -1   55.36    4.66 
  15   2  -1   45.22    4.11 
 -15  -2   1   43.03    4.93 
 -15   2   1   41.11    5.76 
  15   2  -1   48.78    4.66 
  15  -2  -1   42.48    5.76 
  15   2  -1   42.75    4.93 
  15  -2  -1   41.11    6.03 
 -15  -2   1   42.20    5.76 
 -15   2   1   39.19    5.48 
  15  -2  -1   40.01    4.66 
 -15  -2   1   41.66    4.93 
 -15   2   1   40.01    5.76 
 -15  -2   1   45.49    4.93 
 -16   2   1    8.50    3.84 
  16  -2  -1   10.69    3.84 
  16   2  -1   11.78    3.84 
  16   2  -1   10.69    3.84 
 -16  -2   1    7.67    5.48 
 -16   2   1   10.14    4.11 
  16   2  -1    9.87    4.11 
  16  -2  -1    7.40    3.84 
  16   2  -1   10.41    5.76 
  16  -2  -1    9.04    4.11 
 -16  -2   1    8.22    5.48 
 -16   2   1   11.24    4.38 
  16  -2  -1   11.24    4.11 
 -16  -2   1    9.04    6.03 
 -16   2   1    7.40    4.66 
 -16  -2   1    7.67    4.66 
 -17   2   1  172.10   10.14 
  17  -2  -1  200.60   10.96 
  17   2  -1  197.59   10.96 
  17   2  -1  191.01   10.69 
 -17  -2   1  169.91   10.41 
 -17   2   1  166.35    9.87 
  17   2  -1  178.68   10.41 
  17  -2  -1  181.70   10.41 
  17   2  -1  190.46   10.96 
  17  -2  -1  191.56   10.96 
 -17  -2   1  180.60   11.24 
 -17   2   1  173.47   10.41 
 -17  -2   1  180.33   11.24 
 -17   2   1  182.79   10.96 
 -17  -2   1  174.30   10.41 
  18  -2  -1  258.98   15.07 
  18   2  -1  276.52   15.89 
  18  -2  -1  266.10   15.35 
 -18  -2   1  218.14   13.98 
 -18   2   1  227.74   13.98 
  18   2  -1  260.35   15.35 
  18  -2  -1  260.62   15.89 
  18   2  -1  254.04   15.89 
  18  -2  -1  235.14   14.25 
 -18  -2   1  235.68   14.25 
 -18   2   1  251.58   15.62 
 -18  -2   1  242.53   14.80 
 -18   2   1  222.53   13.98 
 -18  -2   1  238.70   14.52 
 -18   2   1  236.78   14.52 
  19  -2  -1   12.61    6.30 
  19  -2  -1   12.61    4.66 
 -19  -2   1   11.51    5.21 
 -19   2   1   10.41    6.58 
  19   2  -1   13.43    4.66 
  19  -2  -1   10.41    4.66 
  19   2  -1   10.41    4.93 
  19  -2  -1   13.15    4.93 
 -19  -2   1    9.87    4.93 
 -19   2   1   10.69    4.93 
 -19  -2   1   10.41    5.48 
 -19   2   1    8.77    5.21 
 -19  -2   1   10.14    6.30 
 -19   2   1   10.41    4.93 
  20  -2  -1    5.48    4.66 
  20  -2  -1    4.93    4.38 
 -20  -2   1    0.27    5.76 
 -20   2   1    4.11    6.03 
  20   2  -1    3.29    5.21 
  20  -2  -1    3.56    4.93 
  20   2  -1    3.84    6.58 
  20  -2  -1    1.92    4.93 
 -20  -2   1    4.11    5.21 
 -20   2   1    1.10    6.30 
 -20  -2   1    5.48    5.48 
 -20   2   1    5.76    5.48 
 -20  -2   1    3.84    5.21 
 -20   2   1    5.21    5.21 
  21  -2  -1    0.00    5.21 
  21  -2  -1   -1.37    5.48 
 -21  -2   1    2.19    5.76 
 -21   2   1   -0.27    6.03 
  21   2  -1   -1.10    5.48 
  21  -2  -1   -0.27    5.48 
  21   2  -1    0.82    5.21 
  21  -2  -1    1.64    5.21 
 -21  -2   1    1.92    5.21 
 -21   2   1    0.00    5.21 
 -21  -2   1    1.10    5.76 
 -21   2   1    3.56    6.03 
 -21  -2   1    0.27    7.13 
 -21   2   1    0.00    5.76 
  22  -2  -1    6.30    7.67 
  22  -2  -1   10.14    7.13 
 -22  -2   1   10.41    8.50 
 -22   2   1    6.03    6.58 
  22   2  -1    3.29    6.85 
  22  -2  -1    5.48    7.13 
  22   2  -1    1.92    7.13 
  22  -2  -1    6.85    5.76 
 -22  -2   1    3.56    5.48 
 -22   2   1    3.29    7.13 
 -22  -2   1    2.19    7.67 
 -22   2   1    4.93    7.67 
 -22  -2   1    5.21    6.03 
 -22   2   1    5.76    6.58 
 -21   3  -1   19.46    6.85 
  21  -3   1   18.64    5.48 
 -21  -3  -1   14.52    6.85 
 -21   3  -1   13.15    7.40 
  21   3   1   21.65    5.48 
  21  -3   1   19.73    5.48 
  21   3   1   21.92    6.03 
  21  -3   1   21.10    6.03 
 -21  -3  -1   19.46    5.76 
 -21   3  -1   18.09    7.67 
 -21  -3  -1   14.52    8.50 
 -21   3  -1   18.09    6.03 
 -21  -3  -1   17.54    8.22 
 -21   3  -1   20.01    6.03 
 -20   3  -1   -0.55    4.93 
  20  -3   1   -0.27    4.93 
 -20  -3  -1   -3.29    4.93 
 -20   3  -1   -1.10    6.30 
  20   3   1   -0.82    4.66 
  20  -3   1    0.55    4.93 
  20   3   1    3.56    5.21 
  20  -3   1    0.82    5.21 
 -20  -3  -1    1.10    6.30 
 -20   3  -1   -1.37    4.93 
  20  -3   1    1.64    4.93 
 -20  -3  -1    0.55    5.48 
 -20   3  -1    0.27    6.03 
 -20  -3  -1    3.29    5.21 
 -19   3  -1   -0.27    4.38 
  19  -3   1   -0.27    4.38 
 -19  -3  -1   -1.64    4.66 
 -19   3  -1   -0.27    4.93 
  19   3   1   -2.74    6.30 
  19  -3   1    0.82    5.48 
  19   3   1   -1.37    5.48 
  19  -3   1   -0.55    6.58 
 -19  -3  -1   -2.47    6.85 
 -19   3  -1   -0.27    4.66 
  19  -3   1    1.92    6.03 
 -19  -3  -1    1.10    5.21 
 -19   3  -1    0.00    5.21 
 -19  -3  -1   -0.82    4.93 
 -18   3  -1    6.03    5.48 
  18  -3   1    2.47    5.21 
 -18  -3  -1    6.30    4.66 
 -18   3  -1    4.66    4.93 
  18   3   1    0.55    4.38 
  18  -3   1    1.92    4.11 
  18   3   1    0.27    4.66 
  18  -3   1    5.48    4.93 
 -18  -3  -1    1.10    4.66 
 -18   3  -1    1.10    6.30 
  18  -3   1    3.56    5.21 
 -18  -3  -1    0.82    4.93 
 -18   3  -1    3.01    4.93 
 -18  -3  -1    3.84    5.48 
 -17   3  -1  120.03    8.22 
  17  -3   1  138.94    9.59 
 -17  -3  -1  112.09    8.22 
 -17   3  -1  119.49    8.50 
  17   3   1  122.23    8.50 
  17  -3   1  129.63    8.50 
  17   3   1  131.00    9.04 
  17  -3   1  126.34    8.77 
 -17  -3  -1  124.97    9.04 
 -17   3  -1  123.60    8.50 
  17  -3   1  122.50    8.77 
 -17  -3  -1  131.54    9.32 
 -17   3  -1  124.14    9.32 
 -17  -3  -1  130.45    9.04 
 -16   3  -1   17.81    4.11 
  16  -3   1   17.27    4.11 
 -16  -3  -1   14.52    5.76 
 -16   3  -1   17.27    5.21 
  16   3   1   17.81    4.38 
  16  -3   1   18.36    4.38 
  16   3   1   16.44    4.66 
  16  -3   1   20.28    4.38 
 -16  -3  -1   17.54    4.66 
 -16   3  -1   16.17    4.11 
  16  -3   1   15.35    4.38 
 -16  -3  -1   15.89    5.48 
 -16   3  -1   13.98    6.03 
 -16  -3  -1   16.17    4.66 
 -15   3  -1   34.53    4.38 
  15  -3   1   39.19    4.38 
 -15  -3  -1   38.92    4.66 
 -15   3  -1   36.45    4.38 
  15   3   1   35.90    5.48 
  15  -3   1   35.90    4.66 
  15   3   1   41.93    4.93 
  15  -3   1   41.11    5.48 
 -15  -3  -1   39.19    6.58 
 -15   3  -1   38.09    4.66 
 -15  -3  -1   41.66    6.58 
  15  -3   1   35.35    6.03 
 -15   3  -1   38.37    6.03 
 -15  -3  -1   37.82    4.93 
 -14   3  -1  129.90    6.85 
  14  -3   1  165.25    9.04 
 -14  -3  -1  133.19    7.13 
 -14   3  -1  145.52    8.22 
  14   3   1  152.37    8.50 
  14  -3   1  146.62    8.22 
  14   3   1  155.11    8.77 
 -14  -3  -1  141.41    8.50 
  14  -3   1  157.85    8.77 
 -14   3  -1  150.18    8.50 
 -14  -3  -1  149.91    8.77 
  14  -3   1  149.36    8.50 
 -14   3  -1  157.03    9.59 
 -14  -3  -1  143.05    9.32 
 -13   3  -1  166.07    7.95 
  13  -3   1  168.54    7.95 
 -13  -3  -1  155.66    7.95 
 -13   3  -1  178.41    8.50 
  13   3   1  180.60    8.50 
  13  -3   1  162.79    7.67 
  13   3   1  180.33    8.77 
 -13  -3  -1  158.40    8.50 
  13  -3   1  177.58    8.77 
 -13   3  -1  164.98    8.77 
 -13  -3  -1  164.70    8.50 
  13  -3   1  160.32    9.04 
 -13   3  -1  159.77    9.32 
 -13  -3  -1  158.68    9.04 
 -12   3  -1  412.99   13.43 
  12  -3   1  401.76   13.15 
 -12  -3  -1  365.31   12.88 
 -12   3  -1  409.43   13.98 
  12   3   1  437.93   14.25 
  12  -3   1  412.99   13.70 
  12   3   1  411.08   13.70 
 -12  -3  -1  406.69   13.70 
  12  -3   1  428.61   14.52 
 -12   3  -1  401.76   13.43 
 -12  -3  -1  422.59   14.25 
  12  -3   1  403.13   13.70 
 -12   3  -1  402.31   13.98 
 -12  -3  -1  396.55   13.70 
 -11   3  -1    0.82    2.74 
  11  -3   1    0.00    3.29 
 -11  -3  -1   -0.27    3.29 
 -11   3  -1   -0.82    3.29 
  11   3   1    0.55    3.56 
  11  -3   1    0.00    2.47 
  11   3   1    0.00    3.84 
 -11  -3  -1    1.37    4.38 
  11  -3   1   -0.82    3.56 
 -11   3  -1   -0.27    3.84 
 -11  -3  -1    0.27    3.29 
  11  -3   1    0.00    3.84 
 -11   3  -1    0.27    3.29 
 -11  -3  -1    0.00    3.01 
 -10   3  -1  556.87   13.15 
  10  -3   1  596.33   12.61 
 -10  -3  -1  574.96   13.70 
 -10   3  -1  604.55   13.70 
  10   3   1  616.89   13.43 
  10  -3   1  600.72   13.15 
  10   3   1  616.07   13.70 
 -10  -3  -1  579.89   13.70 
  10  -3   1  597.98   13.98 
 -10   3  -1  629.22   13.70 
  10  -3   1  591.95   13.98 
 -10   3  -1  602.09   14.52 
 -10  -3  -1  592.22   13.43 
  10   3   1  578.79   13.43 
  -9   3  -1    9.32    2.74 
   9  -3   1   10.41    2.74 
  -9  -3  -1   10.41    3.29 
   9   3   1   10.96    3.01 
  -9   3  -1   10.14    2.74 
   9  -3   1   12.33    2.74 
   9   3   1   10.14    4.11 
  -9  -3  -1   12.88    3.29 
   9  -3   1   10.96    3.01 
  -9   3  -1   10.69    3.84 
   9  -3   1   12.06    4.38 
  -9   3  -1   12.33    3.29 
  -9  -3  -1   10.14    4.11 
   9   3   1    9.04    4.11 
  -8   3  -1  320.09    9.59 
   8  -3   1  314.06    9.32 
  -8  -3  -1  343.11   10.41 
   8   3   1  326.39   10.14 
  -8   3  -1  281.45    9.04 
   8  -3   1  331.60   10.14 
   8   3   1  324.75   10.41 
  -8  -3  -1  312.97    9.87 
   8  -3   1  306.39    9.87 
  -8   3  -1  327.49    9.87 
   8  -3   1  320.09   10.41 
  -8   3  -1  331.05   10.14 
  -8  -3  -1  302.83    9.87 
   8   3   1  318.17   10.14 
  -7   3  -1   53.44    4.66 
   7  -3   1   46.31    4.11 
  -7   3  -1   53.17    3.84 
  -7  -3  -1   57.82    4.38 
   7   3   1   51.52    4.11 
  -7   3  -1   49.88    3.84 
   7   3   1   54.26    4.38 
  -7  -3  -1   50.97    4.93 
   7  -3   1   49.60    4.11 
  -7   3  -1   53.71    4.38 
   7  -3   1   55.08    4.38 
  -7   3  -1   59.47    4.66 
  -7  -3  -1   55.36    4.66 
   7   3   1   53.99    5.21 
   6  -3   1  606.20   12.06 
  -6   3  -1  666.22   13.70 
  -6  -3  -1  678.82   14.52 
   6   3   1  654.98   12.88 
  -6   3  -1  625.38   13.15 
   6   3   1  632.51   13.15 
  -6  -3  -1  639.91   13.98 
   6  -3   1  655.53   13.98 
  -6   3  -1  665.12   13.98 
   6  -3   1  592.22   20.83 
  -6   3  -1  627.03   13.98 
  -6  -3  -1  636.07   13.70 
   6   3   1  621.27   13.15 
  -5   3  -1   92.63    4.93 
  -5  -3  -1   89.07    4.93 
   5  -3   1   91.26    4.66 
  -5  -3  -1   86.87    4.66 
  -5   3  -1   93.73    5.21 
  -5  -3  -1   99.21    5.76 
   5   3   1   92.35    5.48 
  -5   3  -1   92.35    4.93 
   5   3   1   92.35    4.93 
  -5  -3  -1   99.48    5.48 
   5  -3   1   94.82    5.21 
  -5   3  -1  104.41    5.76 
   5  -3   1   93.18    6.03 
  -5   3  -1   95.37    6.03 
  -5  -3  -1   92.63    5.21 
   5   3   1   92.35    5.48 
   4   3   1   57.55    3.84 
  -4   3  -1   53.99    3.84 
  -4  -3  -1   56.18    3.84 
   4  -3   1   55.08    4.38 
  -4   3  -1   61.66    4.11 
  -4  -3  -1   60.29    4.38 
   4   3   1   46.86    3.84 
  -4   3  -1   57.82    4.11 
   4   3   1   55.63    4.66 
  -4  -3  -1   57.00    4.93 
   4  -3   1   59.47    4.11 
  -4   3  -1   60.57    4.66 
   4  -3   1   58.65    4.93 
  -4   3  -1   57.55    4.66 
  -4  -3  -1   60.84    4.38 
   4   3   1   57.82    4.38 
   3   3   1  319.82   12.06 
  -3  -3  -1  336.26   12.61 
  -3   3  -1  286.66   11.51 
   3  -3   1  336.26   12.61 
   3  -3   1  315.16   12.33 
  -3   3  -1  342.01   13.15 
  -3  -3  -1  311.60   12.33 
   3   3   1  334.89   12.61 
   3   3   1  336.81   13.15 
  -3  -3  -1  339.82   13.15 
   3  -3   1  339.27   13.15 
  -3   3  -1  347.50   13.15 
   3  -3   1  331.33   12.88 
  -3   3  -1  333.25   13.15 
  -3  -3  -1  326.39   12.88 
   3   3   1  329.13   12.88 
   2   3   1   10.14    2.47 
  -2  -3  -1   12.06    2.19 
  -2   3  -1   12.33    2.47 
   2  -3   1   10.96    2.47 
   2  -3   1   11.78    2.74 
  -2   3  -1   10.96    2.47 
  -2  -3  -1    9.87    2.74 
   2   3   1    9.87    2.19 
  -2  -3  -1    8.77    2.74 
   2  -3   1    9.59    2.19 
  -2   3  -1   11.24    2.47 
  -2  -3  -1   10.96    2.74 
   2  -3   1    9.87    2.47 
  -2   3  -1   10.41    2.47 
  -2  -3  -1   11.51    3.29 
   2   3   1   10.41    2.47 
   1   3   1    1.92    1.92 
  -1  -3  -1    1.92    1.92 
  -1   3  -1    0.82    2.47 
   1  -3   1    0.82    2.47 
   1  -3   1    2.19    2.19 
  -1   3  -1    3.84    2.47 
  -1  -3  -1    1.64    1.92 
   1   3   1    1.64    2.19 
  -1  -3  -1    4.11    3.01 
   1  -3   1    1.92    2.47 
   1  -3   1    1.10    2.74 
  -1  -3  -1    1.10    2.19 
   1  -3   1    1.64    3.01 
  -1   3  -1    1.10    2.47 
  -1  -3  -1   -0.55    2.47 
   1   3   1    0.55    2.19 
   0   3   1  131.27    5.48 
   0  -3  -1  139.77    5.76 
   0   3  -1  133.46    5.76 
   0  -3   1  138.94    5.48 
   0  -3   1  135.38    5.76 
   0   3  -1  141.41    6.30 
   0  -3  -1  126.61    5.48 
   0   3   1  135.93    5.76 
   0  -3   1  135.93    6.30 
   0  -3  -1  134.83    6.30 
   0   3   1  134.83    6.03 
   0  -3   1  134.56    6.30 
   0  -3   1  138.94    6.58 
   0   3  -1  143.05    6.03 
   0  -3  -1  129.35    6.30 
   0   3   1  137.57    6.03 
  -1   3   1  514.39   17.54 
   1  -3  -1  518.50   17.81 
   1   3  -1  510.01   17.54 
  -1  -3   1  495.76   17.27 
  -1  -3   1  498.50   17.54 
   1   3  -1  502.33   17.81 
   1  -3  -1  501.79   18.09 
  -1   3   1  536.59   18.64 
   1   3  -1  509.19   18.09 
  -1  -3   1  529.47   18.64 
   1  -3  -1  506.72   18.09 
  -1   3   1  549.74   19.18 
  -1  -3   1  526.45   18.64 
   1  -3  -1  551.66   19.46 
  -1   3   1  493.56   17.54 
   1   3  -1  522.61   18.64 
  -2   3   1  371.34   13.70 
   2  -3  -1  377.37   13.70 
   2   3  -1  358.73   13.15 
  -2  -3   1  376.55   13.70 
   2  -3  -1  376.27   14.25 
  -2  -3   1  370.24   14.25 
   2   3  -1  392.99   14.52 
  -2   3   1  380.38   13.98 
   2   3  -1  361.75   13.70 
  -2  -3   1  369.97   13.98 
   2  -3  -1  381.75   14.52 
  -2   3   1  378.46   14.25 
   2  -3  -1  373.53   14.25 
  -2   3   1  379.56   14.52 
  -2  -3   1  366.68   13.98 
   2   3  -1  379.01   14.25 
  -3   3   1  218.69    7.13 
   3  -3  -1  214.86    7.13 
   3   3  -1  204.72    6.85 
  -3  -3   1  212.94    6.85 
  -3  -3   1  217.87    7.40 
   3   3  -1  214.58    7.13 
  -3   3   1  204.17    7.13 
   3   3  -1  196.22    7.40 
  -3  -3   1  217.87    7.40 
   3  -3  -1  207.46    7.40 
  -3   3   1  212.66    7.67 
   3  -3  -1  201.70    7.67 
  -3   3   1  212.94    7.40 
  -3  -3   1  212.39    7.67 
   3   3  -1  217.05    7.67 
  -4   3   1    9.04    2.47 
   4  -3  -1    9.04    2.47 
   4   3  -1    9.04    2.19 
  -4  -3   1    7.95    2.47 
  -4   3   1    9.87    2.19 
  -4  -3   1    8.50    2.47 
   4   3  -1    8.22    3.29 
  -4   3   1    0.00    1.10 
   4   3  -1    8.50    2.47 
  -4  -3   1    9.04    2.47 
   4  -3  -1    7.40    2.74 
  -4   3   1    8.50    2.47 
   4  -3  -1    7.67    2.74 
  -4   3   1    9.04    3.29 
  -4  -3   1    7.95    2.74 
   4   3  -1    6.58    3.29 
  -5   3   1  442.32   15.89 
   5  -3  -1  449.99   15.89 
   5   3  -1  427.52   15.35 
  -5  -3   1  445.06   15.89 
  -5   3   1  420.39   15.35 
  -5  -3   1  443.69   15.89 
   5   3  -1  455.47   16.44 
   5   3  -1  444.24   16.17 
  -5  -3   1  448.07   16.44 
   5  -3  -1  459.58   16.44 
  -5   3   1  457.66   16.72 
   5  -3  -1  423.13   15.89 
  -5   3   1  453.55   16.72 
  -5  -3   1  433.55   15.89 
   5   3  -1  454.92   16.44 
  -6   3   1  947.12   16.17 
   6  -3  -1  940.27   15.62 
   6   3  -1  918.62   15.89 
  -6  -3   1  940.54   15.89 
   6   3  -1  958.90   16.72 
  -6  -3   1  895.05   16.72 
   6  -3  -1  937.53   16.99 
  -6   3   1  927.66   17.27 
   6  -3  -1  892.58   16.72 
  -6   3   1  963.56   17.27 
  -6  -3   1  887.37   16.44 
   6   3  -1  927.11   16.99 
  -7   3   1  291.59    9.32 
   7  -3  -1  285.01    9.04 
   7   3  -1  317.08    9.04 
  -7  -3   1  303.37    9.04 
  -7  -3   1  302.00    9.87 
  -7   3   1  289.12    9.04 
   7   3  -1  285.56    9.04 
   7  -3  -1  295.43    9.04 
   7   3  -1  312.14    9.87 
  -7  -3   1  299.26    9.87 
   7  -3  -1  293.23    9.32 
  -7   3   1  289.67    9.59 
   7  -3  -1  297.34    9.59 
  -7   3   1  297.62    9.59 
  -7  -3   1  300.09    9.87 
   7   3  -1  289.95    9.87 
  -8   3   1  939.44   18.64 
   8  -3  -1 1001.11   19.18 
   8   3  -1  977.81   18.64 
  -8  -3   1  958.90   19.46 
   8  -3  -1  959.72   18.91 
   8   3  -1 1008.51   20.28 
   8  -3  -1  982.47   19.46 
  -8   3   1  953.15   19.18 
   8  -3  -1  954.79   19.46 
  -8   3   1  982.20   20.01 
  -8  -3   1  946.57   19.46 
   8   3  -1 1001.65   20.01 
   9   3  -1    3.84    2.19 
  -9   3   1    3.01    2.74 
   9  -3  -1    3.29    2.74 
   9   3  -1    0.82    1.92 
  -9  -3   1    3.84    3.84 
  -9   3   1    4.38    2.74 
   9   3  -1    3.29    2.74 
   9  -3  -1    4.93    2.47 
   9   3  -1    5.48    4.11 
  -9  -3   1    1.37    2.74 
   9  -3  -1    4.11    2.74 
  -9   3   1    2.74    2.74 
   9  -3  -1    4.11    3.84 
  -9   3   1    4.38    3.56 
  -9  -3   1    2.74    2.74 
   9   3  -1    3.29    3.56 
 -10   3   1  261.72    9.04 
  10   3  -1  287.75    9.04 
  10  -3  -1  271.04    8.50 
 -10  -3   1  210.47    8.50 
 -10   3   1  265.01    8.77 
  10   3  -1  282.27    8.77 
  10  -3  -1  250.21    8.22 
  10   3  -1  261.44    8.77 
 -10  -3   1  263.91    9.32 
  10  -3  -1  253.22    8.50 
 -10   3   1  258.16    8.50 
  10  -3  -1  260.90    8.77 
 -10   3   1  243.36    8.77 
 -10  -3   1  246.10    8.77 
  10   3  -1  253.77    8.50 
 -11   3   1  104.41    5.76 
  11   3  -1  127.16    7.13 
  11  -3  -1  111.54    6.85 
 -11  -3   1   84.96    6.03 
 -11   3   1  101.67    5.76 
  11   3  -1  114.00    6.30 
  11  -3  -1  111.81    6.30 
  11   3  -1  120.03    6.85 
 -11  -3   1  107.70    6.03 
  11  -3  -1  116.20    6.58 
 -11   3   1  103.04    6.03 
  11  -3  -1  114.28    6.85 
 -11   3   1  117.29    6.85 
 -11  -3   1  117.02    6.58 
  11   3  -1  115.65    6.58 
 -12   3   1    1.37    3.01 
  12  -3  -1    1.10    3.84 
  12   3  -1    1.92    3.84 
  12   3  -1    0.00    3.29 
 -12  -3   1    0.27    4.38 
 -12   3   1    1.92    3.01 
  12   3  -1    3.01    4.66 
  12  -3  -1    1.64    3.29 
  12   3  -1    0.55    3.29 
 -12  -3   1    2.19    3.56 
  12  -3  -1    1.37    3.29 
 -12   3   1    0.55    3.01 
 -12  -3   1    1.64    3.29 
  12  -3  -1    0.27    3.56 
 -12   3   1    1.10    4.66 
 -12  -3   1    1.37    3.29 
 -13   3   1   12.06    3.56 
  13  -3  -1   13.43    3.56 
  13   3  -1    9.32    3.01 
 -13  -3   1   11.51    4.93 
 -13   3   1   12.06    3.29 
  13   3  -1    8.22    4.38 
  13  -3  -1   11.78    4.11 
  13   3  -1   13.98    3.84 
 -13  -3   1   13.15    3.84 
  13  -3  -1   14.25    5.21 
 -13   3   1   11.24    3.56 
 -13  -3   1   12.33    5.21 
  13  -3  -1   11.24    3.56 
 -13   3   1   10.96    3.84 
 -13  -3   1   10.14    3.84 
 -14   3   1   38.09    4.38 
  14  -3  -1   44.67    4.38 
 -14  -3   1   41.11    4.93 
 -14   3   1   39.46    4.38 
  14   3  -1   44.67    5.21 
  14  -3  -1   38.09    4.66 
  14   3  -1   36.72    4.66 
 -14  -3   1   37.82    6.03 
  14  -3  -1   41.93    4.66 
 -14   3   1   41.11    4.93 
 -14  -3   1   37.82    4.66 
  14  -3  -1   37.82    4.66 
 -14   3   1   34.26    4.66 
 -14  -3   1   40.29    4.66 
 -15   3   1   63.58    5.48 
  15  -3  -1   68.79    5.48 
 -15  -3   1   64.95    6.03 
 -15   3   1   62.76    6.30 
  15   3  -1   60.57    5.21 
  15  -3  -1   64.68    5.21 
  15   3  -1   65.77    6.03 
  15  -3  -1   63.85    6.58 
 -15  -3   1   66.32    6.58 
 -15   3   1   59.19    6.03 
 -15  -3   1   63.31    6.30 
  15  -3  -1   59.74    5.76 
 -15   3   1   62.48    6.03 
 -15  -3   1   58.37    5.21 
 -16   3   1    0.82    3.56 
  16  -3  -1    2.19    3.84 
 -16  -3   1   -0.82    5.48 
 -16   3   1    1.64    4.66 
  16   3  -1    0.00    3.84 
  16  -3  -1    0.55    3.56 
  16   3  -1    0.82    5.48 
  16  -3  -1    2.47    4.11 
 -16  -3   1    0.27    4.11 
 -16   3   1    0.00    4.66 
  16  -3  -1    2.74    4.11 
 -16  -3   1    0.82    4.38 
 -16   3   1    1.64    4.66 
 -16  -3   1    1.92    4.11 
 -17   3   1    4.11    4.11 
  17  -3  -1    2.47    4.11 
 -17  -3   1    5.21    4.66 
 -17   3   1    3.01    4.11 
  17   3  -1    9.04    4.38 
  17  -3  -1    3.84    4.38 
  17   3  -1    4.93    4.66 
  17  -3  -1    5.21    4.38 
 -17  -3   1    4.66    4.66 
 -17   3   1    2.74    4.38 
  17  -3  -1    5.48    4.38 
 -17  -3   1    4.38    6.58 
 -17   3   1    4.11    4.66 
 -17  -3   1    1.64    4.38 
 -18   3   1    1.10    4.11 
  18  -3  -1    0.27    4.11 
 -18  -3   1   -1.10    4.66 
 -18   3   1    3.56    4.66 
  18   3  -1    1.37    5.21 
  18  -3  -1    3.29    4.38 
  18   3  -1    3.56    4.93 
  18  -3  -1    3.84    6.58 
 -18  -3   1    5.21    4.93 
 -18   3   1    3.01    4.38 
  18  -3  -1    2.47    5.48 
 -18  -3   1    3.56    4.93 
 -18   3   1    1.92    4.93 
 -18  -3   1    2.74    4.66 
 -19   3   1    2.74    4.66 
  19  -3  -1    2.47    5.48 
 -19  -3   1    1.92    6.58 
 -19   3   1    6.03    5.21 
  19   3  -1    0.27    4.93 
  19  -3  -1    1.92    4.66 
  19   3  -1    3.84    5.48 
  19  -3  -1    0.27    4.66 
 -19  -3   1    2.47    4.93 
 -19   3   1    1.64    4.66 
  19  -3  -1    2.47    4.66 
 -19  -3   1    3.29    5.21 
 -19   3   1    3.01    5.21 
 -19  -3   1    2.19    6.30 
  20  -3  -1   15.62    6.85 
  20  -3  -1   15.89    4.93 
 -20  -3   1   15.07    5.76 
 -20   3   1   12.06    5.76 
  20   3  -1   12.33    5.76 
  20  -3  -1   11.78    6.03 
  20   3  -1   13.43    5.76 
  20  -3  -1    9.04    5.21 
 -20  -3   1   10.41    5.48 
 -20   3   1    7.40    6.58 
 -20  -3   1   10.69    5.76 
 -20   3   1   12.06    7.40 
 -20  -3   1    9.59    5.48 
 -20   3   1   10.69    5.48 
  21  -3  -1    3.01    6.58 
  21  -3  -1    4.11    4.93 
 -21  -3   1    5.48    7.13 
 -21   3   1    3.84    8.22 
  21   3  -1    7.67    6.58 
  21  -3  -1    6.03    5.48 
  21   3  -1    1.92    5.48 
  21  -3  -1    3.29    5.21 
 -21  -3   1    0.00    5.48 
 -21   3   1    2.19    5.21 
 -21  -3   1    3.01    7.67 
 -21   3   1    6.30    6.03 
 -21  -3   1    4.38    5.76 
 -21   3   1    5.21    7.40 
 -21   4  -1    1.64    5.21 
  21  -4   1    1.64    6.03 
 -21  -4  -1    4.93    7.13 
 -21   4  -1    3.84    6.03 
  21   4   1   -1.64    4.93 
  21  -4   1    0.00    5.76 
  21   4   1    0.27    5.76 
  21  -4   1    3.01    5.48 
 -21  -4  -1    2.47    6.30 
 -21   4  -1    1.92    5.48 
  21  -4   1    0.00    5.48 
 -21  -4  -1    2.74    6.03 
 -21   4  -1    1.92    6.03 
 -21  -4  -1    2.47    5.76 
 -20   4  -1    0.00    4.93 
  20  -4   1    1.10    5.76 
 -20  -4  -1    2.47    5.21 
 -20   4  -1    0.55    6.85 
  20   4   1   -0.82    4.66 
  20  -4   1   -2.19    6.58 
  20   4   1    0.00    5.48 
  20  -4   1    0.00    7.40 
 -20  -4  -1    1.37    7.13 
 -20   4  -1   -0.82    6.58 
  20  -4   1   -0.27    7.40 
 -20  -4  -1    0.55    5.48 
 -20   4  -1   -1.10    6.03 
 -20  -4  -1    2.19    5.21 
 -19   4  -1   -3.01    4.38 
  19  -4   1    0.27    4.66 
 -19  -4  -1    0.00    5.76 
 -19   4  -1   -1.37    4.93 
  19   4   1   -1.92    5.21 
  19  -4   1   -0.82    4.66 
  19   4   1   -2.74    5.21 
  19  -4   1    0.00    4.93 
 -19  -4  -1   -1.37    4.93 
 -19   4  -1    0.82    6.85 
  19  -4   1    1.64    4.93 
 -19  -4  -1    0.27    5.48 
 -19   4  -1    2.19    6.58 
 -19  -4  -1   -1.64    6.30 
 -18   4  -1   18.36    6.58 
  18  -4   1   22.47    4.66 
 -18  -4  -1   11.24    4.93 
 -18   4  -1   20.55    5.76 
  18   4   1   19.73    4.93 
  18  -4   1   16.44    4.93 
  18   4   1   19.46    7.40 
  18  -4   1   18.09    4.93 
 -18  -4  -1   12.61    5.21 
 -18   4  -1   18.09    6.03 
  18  -4   1   19.18    5.21 
 -18  -4  -1   21.38    5.76 
 -18   4  -1   21.38    5.48 
 -18  -4  -1   16.17    5.21 
 -17   4  -1   12.33    4.93 
  17  -4   1   15.62    4.38 
 -17  -4  -1   13.43    4.66 
 -17   4  -1   16.17    6.30 
  17   4   1   16.17    4.66 
  17  -4   1   12.06    4.38 
  17   4   1   11.78    6.30 
  17  -4   1   11.78    5.48 
 -17  -4  -1   10.96    4.93 
 -17   4  -1    9.04    5.48 
 -17  -4  -1   15.35    6.30 
  17  -4   1   12.88    6.85 
 -17   4  -1   15.62    5.21 
 -17  -4  -1   14.25    4.93 
 -16   4  -1    9.87    4.11 
  16  -4   1    8.22    5.48 
 -16  -4  -1    7.95    4.38 
 -16   4  -1   11.51    4.11 
  16   4   1   13.15    4.38 
  16  -4   1    9.59    4.11 
  16   4   1    9.04    5.76 
 -16  -4  -1    8.50    5.76 
  16  -4   1    7.95    4.11 
 -16   4  -1    5.76    5.76 
 -16  -4  -1    9.04    4.66 
  16  -4   1    8.50    4.38 
 -16   4  -1    9.59    4.93 
 -16  -4  -1    7.67    4.38 
 -15   4  -1    2.19    3.84 
  15  -4   1   -0.27    3.56 
 -15  -4  -1    0.55    4.66 
 -15   4  -1   -0.27    4.38 
  15   4   1   -0.82    4.93 
  15  -4   1    0.27    4.38 
  15   4   1    1.10    5.48 
 -15  -4  -1    1.92    4.11 
  15  -4   1    0.27    4.11 
 -15   4  -1   -0.27    4.38 
 -15  -4  -1    1.92    4.11 
  15  -4   1    1.37    4.11 
 -15   4  -1    3.01    4.38 
 -15  -4  -1    0.00    4.11 
 -14   4  -1    8.77    3.84 
  14  -4   1   10.69    3.56 
 -14  -4  -1   12.06    4.11 
 -14   4  -1   11.51    3.56 
  14   4   1    9.32    4.11 
  14  -4   1   10.41    3.84 
  14   4   1   13.43    5.76 
 -14  -4  -1   13.70    5.21 
  14  -4   1   11.78    5.21 
 -14   4  -1   11.51    3.84 
 -14  -4  -1   12.33    4.38 
  14  -4   1   10.96    4.11 
 -14   4  -1   14.25    4.38 
 -14  -4  -1   10.69    4.11 
 -13   4  -1   37.00    4.38 
  13  -4   1   36.17    4.93 
 -13  -4  -1   33.98    5.76 
 -13   4  -1   33.43    4.38 
  13   4   1   36.72    4.38 
  13   4   1   38.64    4.66 
 -13  -4  -1   38.09    4.66 
  13  -4   1   38.37    4.38 
 -13   4  -1   31.52    5.48 
 -13  -4  -1   36.72    4.66 
  13  -4   1   38.09    6.03 
 -13   4  -1   36.45    6.30 
 -13  -4  -1   37.54    4.66 
 -12   4  -1  176.76    7.95 
  12  -4   1  189.09    8.22 
 -12   4  -1  177.31    8.22 
 -12  -4  -1  171.01    7.95 
 -12   4  -1  167.44    7.95 
  12   4   1  190.46    8.77 
  12   4   1  194.30    8.77 
 -12  -4  -1  191.56    9.32 
  12  -4   1  195.95    8.50 
 -12   4  -1  189.09    8.50 
  12  -4   1  192.11    8.77 
 -12   4  -1  195.95    9.04 
 -12  -4  -1  178.68    8.77 
  12   4   1  179.50    8.22 
 -11   4  -1   66.32    5.76 
  11  -4   1   67.14    4.66 
 -11   4  -1   62.21    4.66 
 -11  -4  -1   63.31    4.93 
  11   4   1   59.19    5.21 
 -11   4  -1   57.55    4.38 
  11   4   1   68.24    6.03 
 -11  -4  -1   62.76    4.93 
  11  -4   1   61.39    5.48 
 -11   4  -1   64.95    4.93 
  11  -4   1   57.82    4.93 
 -11   4  -1   61.94    5.21 
 -11  -4  -1   60.02    4.93 
  11   4   1   66.59    5.48 
 -10   4  -1  401.76   14.25 
  10  -4   1  415.73   14.25 
 -10   4  -1  404.22   14.25 
 -10  -4  -1  386.96   13.43 
  10   4   1  434.64   14.52 
 -10   4  -1  423.68   14.52 
  10   4   1  446.70   15.07 
 -10  -4  -1  410.25   14.52 
  10  -4   1  425.33   14.80 
 -10   4  -1  432.45   14.80 
  10  -4   1  441.50   15.07 
 -10   4  -1  443.41   15.35 
 -10  -4  -1  420.12   14.52 
  10   4   1  404.22   13.98 
  -9   4  -1   86.05    5.48 
   9  -4   1   97.29    5.21 
  -9   4  -1   93.73    5.76 
  -9  -4  -1   92.90    6.03 
   9   4   1   98.93    5.48 
  -9   4  -1   92.90    5.21 
   9   4   1   99.48    5.48 
  -9  -4  -1   92.08    5.48 
   9  -4   1   95.92    6.03 
  -9   4  -1   99.48    6.03 
   9  -4   1   96.74    5.76 
  -9   4  -1   97.56    5.76 
  -9  -4  -1   99.21    5.76 
   9   4   1   94.27    5.76 
  -8   4  -1   99.75    5.48 
   8  -4   1  115.10    5.48 
  -8   4  -1  110.44    5.76 
  -8  -4  -1   92.08    5.48 
   8   4   1  114.55    6.30 
  -8   4  -1  100.58    5.48 
   8   4   1  104.96    5.48 
  -8  -4  -1  108.25    5.76 
   8  -4   1  111.54    5.76 
  -8   4  -1  116.47    5.76 
   8  -4   1  107.15    5.76 
  -8   4  -1  113.46    6.03 
  -8  -4  -1  107.43    5.76 
   8   4   1  104.69    5.76 
  -7   4  -1  110.17    6.30 
   7  -4   1  109.35    5.76 
  -7  -4  -1  113.46    5.76 
  -7  -4  -1  100.03    5.48 
  -7   4  -1  108.80    6.30 
  -7  -4  -1   87.97    5.76 
   7   4   1  106.88    6.03 
  -7   4  -1  107.70    6.03 
   7   4   1  110.17    6.30 
  -7  -4  -1  107.15    6.30 
   7  -4   1  115.10    6.58 
  -7   4  -1  112.09    6.30 
   7  -4   1  106.33    6.85 
  -7   4  -1  102.49    6.03 
  -7  -4  -1  108.52    6.03 
   7   4   1  103.04    6.03 
  -6   4  -1  399.57   10.96 
   6  -4   1  418.47   10.96 
  -6  -4  -1  448.62   11.24 
  -6   4  -1  450.81   12.33 
  -6  -4  -1  404.22   11.51 
   6   4   1  435.47   11.24 
  -6   4  -1  392.44   10.96 
   6   4   1  436.01   11.78 
  -6  -4  -1  398.20   12.06 
   6  -4   1  424.50   11.51 
  -6   4  -1  436.01   12.06 
   6  -4   1  425.33   11.78 
  -6   4  -1  397.10   11.78 
  -6  -4  -1  415.73   11.51 
   6   4   1  429.98   11.78 
   5   4   1  787.62   16.44 
  -5   4  -1  778.03   16.44 
   5  -4   1  791.18   16.44 
  -5  -4  -1  782.41   16.72 
  -5  -4  -1  758.02   16.44 
   5   4   1  798.31   16.44 
  -5   4  -1  762.68   16.72 
   5   4   1  785.15   17.27 
  -5  -4  -1  758.85   16.72 
   5  -4   1  769.81   16.72 
  -5   4  -1  802.42   17.81 
   5  -4   1  799.95   17.81 
  -5   4  -1  791.46   17.54 
  -5  -4  -1  802.97   17.27 
   5   4   1  774.47   16.99 
   4   4   1   24.94    2.74 
  -4   4  -1   24.39    3.29 
  -4  -4  -1   24.94    3.01 
   4  -4   1   25.49    3.84 
   4  -4   1   22.47    3.29 
  -4   4  -1   24.12    3.01 
  -4  -4  -1   21.65    3.84 
   4   4   1   23.57    3.84 
   4   4   1   26.31    4.38 
  -4  -4  -1   24.12    3.56 
   4  -4   1   19.46    3.29 
  -4   4  -1   22.75    3.84 
   4  -4   1   21.38    3.84 
  -4   4  -1   22.75    4.11 
  -4  -4  -1   23.02    4.11 
   4   4   1   20.55    3.29 
   3   4   1 1079.48   16.99 
  -3   4  -1 1081.95   17.54 
  -3  -4  -1 1059.48   17.27 
   3  -4   1 1090.99   17.27 
  -3   4  -1 1121.96   18.64 
   3   4   1 1084.42   17.54 
  -3  -4  -1 1044.13   17.81 
   3  -4   1 1119.22   18.91 
   3  -4   1 1087.43   18.64 
  -3   4  -1 1126.89   18.64 
  -3  -4  -1 1069.62   18.09 
   3   4   1 1086.34   18.09 
   2   4   1   90.16    4.93 
  -2  -4  -1   90.16    4.93 
  -2   4  -1   90.44    4.93 
   2  -4   1   91.26    4.93 
   2  -4   1   88.24    5.21 
  -2   4  -1   86.60    5.21 
  -2  -4  -1   84.68    4.66 
   2   4   1   90.44    4.93 
  -2  -4  -1   87.97    5.21 
   2  -4   1   86.87    5.21 
  -2  -4  -1   87.97    5.21 
  -2   4  -1   92.90    5.48 
   2  -4   1   86.87    5.21 
  -2   4  -1   82.22    5.21 
  -2  -4  -1   81.67    5.48 
   2   4   1   90.44    5.21 
   1   4   1  835.03   15.07 
  -1   4  -1  843.80   14.80 
   1  -4   1  862.16   15.07 
   1  -4   1  849.28   16.17 
  -1   4  -1  884.91   16.17 
  -1  -4  -1  858.33   15.35 
   1   4   1  858.87   15.07 
   1  -4   1  838.59   16.17 
   1  -4   1  846.82   16.44 
  -1  -4  -1  864.35   16.17 
   1  -4   1  850.10   15.89 
  -1   4  -1  871.21   16.17 
  -1  -4  -1  859.97   16.17 
   1   4   1  883.81   15.89 
   0   4   1    2.74    2.19 
   0  -4  -1    3.84    2.47 
   0   4  -1    1.92    2.19 
   0  -4   1    1.92    2.74 
   0  -4   1    6.30    3.01 
   0   4  -1    2.74    2.47 
   0  -4  -1    3.29    2.19 
   0   4   1    2.74    2.19 
   0  -4   1    2.19    2.19 
   0  -4  -1    2.19    3.29 
   0  -4   1    2.47    3.29 
   0   4   1    2.74    2.47 
   0  -4   1    1.64    2.74 
   0  -4  -1    1.64    2.47 
   0   4  -1    3.29    2.47 
   0   4   1    3.01    2.47 
  -1   4   1  122.23    5.48 
   1  -4  -1  127.71    6.03 
   1   4  -1  121.95    5.76 
  -1  -4   1  129.63    5.48 
  -1  -4   1  129.08    5.76 
   1  -4  -1  120.58    5.48 
   1   4  -1  134.56    6.03 
  -1   4   1  134.83    5.76 
   1   4  -1  137.57    6.03 
  -1  -4   1  120.86    6.03 
   1  -4  -1  132.37    6.30 
  -1   4   1  137.03    6.58 
   1  -4  -1   90.71    5.76 
  -1  -4   1  134.83    6.30 
   1   4  -1  136.48    6.58 
  -1   4   1  113.46    6.03 
   2  -4  -1 1947.13   24.94 
  -2  -4   1 1875.33   25.21 
   2  -4  -1 1919.72   25.76 
   2   4  -1 1932.05   26.58 
  -2  -4   1 1894.24   26.58 
   2  -4  -1 1958.09   26.86 
  -2   4   1 1943.29   26.03 
  -2  -4   1 1878.89   25.76 
  -2   4   1 1887.66   26.86 
   2   4  -1 1949.32   26.31 
  -3   4   1  221.43    9.32 
   3  -4  -1  231.85    9.59 
   3   4  -1  226.37    9.32 
  -3  -4   1  219.79    7.13 
   3  -4  -1  204.72    7.67 
  -3  -4   1  217.32    7.67 
   3   4  -1  238.97   10.14 
  -3   4   1  234.59    9.87 
   3   4  -1  233.22    9.87 
  -3  -4   1  214.31    7.95 
   3  -4  -1  214.31    7.95 
  -3   4   1  219.24    7.40 
   3  -4  -1  232.94   10.14 
  -3   4   1  232.67   10.41 
  -3  -4   1  218.97    7.67 
   3   4  -1  232.12    9.87 
   4  -4  -1  524.26   17.81 
   4   4  -1  507.27   17.54 
  -4  -4   1  518.78   17.81 
  -4  -4   1  519.87   18.64 
   4   4  -1  527.55   18.36 
   4   4  -1  517.68   18.36 
  -4  -4   1  509.19   18.09 
   4  -4  -1  522.89   18.36 
  -4   4   1  516.58   18.36 
   4  -4  -1  505.07   17.81 
  -4   4   1  516.58   18.64 
  -4  -4   1  511.38   18.09 
   4   4  -1  512.20   18.36 
  -5   4   1    7.67    2.74 
   5  -4  -1    6.30    3.56 
   5   4  -1    5.76    1.92 
  -5  -4   1    6.30    2.47 
  -5   4   1    7.40    2.74 
  -5  -4   1    6.03    2.74 
   5   4  -1    7.13    3.56 
   5   4  -1    6.30    2.74 
  -5  -4   1    7.67    3.56 
   5  -4  -1    6.03    3.56 
  -5   4   1    6.85    2.74 
   5  -4  -1    7.67    3.29 
  -5   4   1    4.93    2.74 
  -5  -4   1    4.38    3.01 
   5   4  -1    8.22    3.29 
  -6   4   1  655.53   14.80 
   6  -4  -1  669.23   14.80 
   6   4  -1  668.68   14.52 
  -6  -4   1  644.02   14.52 
  -6  -4   1  657.72   15.07 
  -6  -4   1  642.10   15.35 
   6  -4  -1  647.85   15.62 
  -6   4   1  641.83   15.35 
   6  -4  -1  651.42   15.35 
  -6   4   1  604.01   15.35 
  -6  -4   1  607.02   14.80 
   6   4  -1  611.13   15.35 
  -7   4   1    0.55    2.47 
   7  -4  -1    1.10    2.47 
   7   4  -1    1.37    2.19 
  -7  -4   1    1.37    1.92 
  -7   4   1    0.82    2.47 
  -7  -4   1    1.64    2.74 
   7   4  -1    1.37    3.29 
  -7   4   1    1.10    1.92 
   7   4  -1    1.92    2.74 
  -7  -4   1    1.37    3.29 
   7  -4  -1    2.19    3.56 
  -7   4   1    2.47    2.74 
   7  -4  -1    0.82    2.74 
  -7   4   1    2.19    3.29 
  -7  -4   1    0.82    2.74 
   7   4  -1    3.01    4.11 
  -8   4   1    6.58    3.29 
   8  -4  -1    6.30    2.74 
   8   4  -1    7.13    2.19 
  -8  -4   1    7.95    2.19 
  -8   4   1    6.85    2.19 
  -8  -4   1    7.95    4.38 
  -8   4   1    6.30    2.47 
   8   4  -1    7.95    3.01 
   8   4  -1    7.40    3.29 
  -8  -4   1    6.58    4.38 
   8  -4  -1    6.58    3.29 
  -8   4   1    6.58    4.11 
   8  -4  -1    5.21    3.01 
  -8   4   1    6.85    3.01 
  -8  -4   1    4.11    3.29 
   8   4  -1    6.03    3.01 
  -9   4   1   75.64    4.93 
   9  -4  -1   80.30    5.48 
  -9  -4   1   89.07    5.48 
  -9   4   1   77.56    4.66 
  -9  -4   1   74.82    4.93 
  -9   4   1   84.68    5.21 
   9   4  -1   79.47    4.93 
   9   4  -1   69.61    5.48 
  -9  -4   1   74.27    5.21 
   9  -4  -1   80.30    6.03 
  -9   4   1   79.20    5.21 
   9  -4  -1   76.19    6.03 
  -9   4   1   75.09    5.76 
  -9  -4   1   78.65    5.21 
   9   4  -1   82.76    5.21 
 -10   4   1  123.60    6.58 
  10   4  -1  118.94    6.03 
  10  -4  -1  134.28    6.85 
 -10  -4   1  127.43    6.85 
 -10   4   1  127.16    6.85 
  10   4  -1  124.14    7.40 
  10  -4  -1  134.28    6.85 
  10   4  -1  127.98    6.85 
 -10  -4   1  119.21    7.13 
  10  -4  -1  126.06    6.85 
 -10   4   1  129.90    6.85 
  10  -4  -1  121.40    6.85 
 -10   4   1  128.26    7.67 
 -10  -4   1  118.12    6.85 
  10   4  -1  128.53    7.95 
 -11   4   1  254.04   10.41 
  11  -4  -1  295.15   10.69 
 -11  -4   1  277.34   10.69 
 -11   4   1  311.60   11.24 
  11   4  -1  297.07   10.96 
  11  -4  -1  307.21   10.96 
  11   4  -1  325.85   12.33 
 -11  -4   1  289.67   10.96 
  11  -4  -1  305.57   11.24 
 -11   4   1  294.60   10.96 
  11  -4  -1  294.33   11.51 
 -11   4   1  315.43   12.06 
 -11  -4   1  294.60   11.78 
  11   4  -1  295.70   11.51 
 -12   4   1    0.27    3.29 
  12  -4  -1    0.00    4.11 
 -12  -4   1    1.10    3.56 
 -12   4   1    1.37    3.56 
  12   4  -1    1.64    3.56 
  12  -4  -1    1.10    3.01 
  12   4  -1    1.37    3.56 
 -12  -4   1    3.56    4.93 
  12  -4  -1   -0.82    3.29 
 -12   4   1    1.10    4.11 
  12  -4  -1    3.01    4.93 
 -12   4   1    2.19    3.56 
 -12  -4   1    1.37    3.29 
  12   4  -1    1.10    4.93 
 -13   4   1    9.59    3.56 
  13  -4  -1   12.88    3.56 
 -13  -4   1   10.41    4.11 
 -13   4   1   11.24    4.11 
  13   4  -1   13.98    3.84 
  13  -4  -1   11.78    3.01 
  13   4  -1   12.33    4.11 
 -13  -4   1   12.06    4.11 
  13  -4  -1   11.24    4.93 
 -13   4   1   12.33    3.84 
  13  -4  -1   10.96    5.21 
 -13   4   1   13.70    4.11 
 -13  -4   1   13.15    5.21 
  13   4  -1   10.41    3.84 
 -14   4   1   13.98    3.84 
  14  -4  -1   14.25    3.84 
 -14  -4   1   10.14    4.38 
 -14   4   1   12.61    3.84 
  14   4  -1   11.24    3.84 
  14  -4  -1   10.96    3.84 
  14   4  -1   12.61    4.11 
 -14  -4   1   13.43    4.38 
  14  -4  -1   11.24    4.66 
 -14   4   1    9.59    3.84 
 -14  -4   1   13.98    4.38 
  14  -4  -1   11.51    4.66 
 -14   4   1   13.43    4.11 
 -14  -4   1   12.61    4.11 
 -15   4   1   11.24    3.84 
  15  -4  -1   11.51    3.84 
 -15  -4   1    8.22    4.66 
 -15   4   1   10.41    3.56 
  15   4  -1   12.33    4.38 
  15  -4  -1    9.59    4.66 
  15   4  -1   12.06    4.38 
 -15  -4   1    9.87    4.38 
  15  -4  -1   10.96    4.38 
 -15   4   1    9.87    5.48 
 -15  -4   1   10.14    4.93 
  15  -4  -1   10.41    4.11 
 -15   4   1   10.69    4.66 
 -15  -4   1    9.04    4.11 
 -16   4   1   13.70    5.21 
  16  -4  -1   20.01    5.21 
 -16  -4   1   16.72    6.30 
 -16   4   1   12.33    4.11 
  16   4  -1   15.35    4.38 
  16  -4  -1   13.70    4.93 
  16   4  -1   16.44    4.66 
 -16  -4   1   14.80    6.30 
  16  -4  -1   14.25    5.76 
 -16   4   1   14.52    5.48 
 -16  -4   1   15.07    4.66 
  16  -4  -1   16.44    4.66 
 -16   4   1   14.52    6.30 
 -16  -4   1   13.15    4.38 
 -17   4   1   26.58    6.30 
  17  -4  -1   24.12    6.30 
 -17  -4   1   26.58    5.48 
 -17   4   1   24.66    4.93 
  17   4  -1   25.49    4.93 
  17  -4  -1   21.65    4.93 
  17   4  -1   21.38    4.93 
  17  -4  -1   25.76    5.21 
 -17  -4   1   27.68    5.48 
 -17   4   1   22.75    5.76 
 -17  -4   1   24.94    5.48 
  17  -4  -1   23.84    4.93 
 -17   4   1   23.84    6.85 
 -17  -4   1   19.73    4.93 
 -18   4   1   27.95    6.30 
  18  -4  -1   42.75    7.13 
 -18  -4   1   37.27    6.03 
 -18   4   1   43.03    6.85 
  18   4  -1   44.94    6.03 
  18  -4  -1   36.72    5.48 
  18   4  -1   41.38    7.67 
  18  -4  -1   37.27    5.76 
 -18  -4   1   43.30    6.30 
 -18   4   1   34.80    7.40 
  18  -4  -1   32.34    5.48 
 -18  -4   1   38.92    6.30 
 -18   4   1   34.53    7.67 
 -18  -4   1   30.15    5.48 
 -19   4   1   12.61    6.30 
  19  -4  -1   21.10    6.85 
 -19  -4   1   15.35    7.13 
 -19   4   1   15.35    7.40 
  19   4  -1   15.62    5.21 
  19  -4  -1   16.99    5.21 
  19   4  -1   16.17    5.21 
  19  -4  -1   18.64    6.58 
 -19  -4   1   20.01    5.48 
 -19   4   1   17.27    6.58 
  19  -4  -1   20.55    5.21 
 -19  -4   1   19.73    7.40 
 -19   4   1   19.73    6.85 
 -19  -4   1   15.89    5.21 
 -20   4   1    1.92    6.03 
  20  -4  -1    6.85    7.13 
 -20  -4   1    3.29    5.48 
 -20   4   1    5.48    7.95 
  20   4  -1    6.30    5.21 
  20  -4  -1    4.38    6.03 
  20   4  -1    5.21    5.21 
  20  -4  -1    6.30    5.21 
 -20  -4   1    5.48    5.48 
 -20   4   1    1.92    5.21 
  20  -4  -1    6.03    5.48 
 -20  -4   1    4.38    5.76 
 -20   4   1    4.11    5.48 
 -20  -4   1    6.03    6.85 
  21  -4  -1    1.64    7.40 
 -21  -4   1    0.82    6.58 
 -21   4   1    1.10    7.95 
  21   4  -1    4.11    5.21 
  21  -4  -1    1.10    5.76 
  21   4  -1    7.67    7.40 
  21  -4  -1    1.64    5.48 
 -21  -4   1    3.56    5.76 
 -21   4   1    0.82    5.48 
  21  -4  -1    2.74    5.76 
 -21  -4   1    0.82    6.30 
 -21   4   1    6.30    6.03 
 -21  -4   1    4.93    5.76 
 -20   5  -1   -0.55    4.93 
  20  -5   1    3.29    6.30 
 -20   5  -1    3.29    6.03 
 -20  -5  -1    1.37    5.48 
 -20   5  -1    0.55    6.03 
  20   5   1    1.64    5.21 
  20   5   1    0.27    5.48 
  20  -5   1    0.82    7.40 
 -20  -5  -1    1.37    5.76 
 -20   5  -1    1.64    5.48 
  20  -5   1    4.11    7.13 
 -20  -5  -1    0.00    5.76 
 -20   5  -1    2.19    7.40 
 -20  -5  -1    0.00    6.03 
 -19   5  -1   13.98    4.93 
  19  -5   1   21.38    5.48 
 -19   5  -1   15.07    6.03 
 -19  -5  -1   17.81    6.85 
 -19   5  -1   18.36    6.85 
  19   5   1   16.44    5.21 
  19   5   1   20.28    5.48 
  19  -5   1   17.27    5.76 
 -19  -5  -1   13.70    7.95 
 -19   5  -1   12.88    5.48 
  19  -5   1   13.15    5.48 
 -19  -5  -1   20.28    6.03 
 -19   5  -1   18.09    7.95 
 -19  -5  -1   12.61    5.21 
 -18   5  -1   13.98    4.93 
  18  -5   1   16.17    4.93 
 -18   5  -1   14.80    5.21 
 -18  -5  -1   16.17    5.21 
 -18   5  -1   16.99    5.76 
  18   5   1   15.89    4.93 
  18   5   1   15.35    5.21 
  18  -5   1   17.54    7.13 
 -18  -5  -1   20.55    5.48 
 -18   5  -1   13.43    4.93 
 -18  -5  -1   12.06    6.85 
  18  -5   1   14.80    5.21 
 -18   5  -1   13.43    6.58 
 -18  -5  -1   14.25    5.21 
 -17   5  -1   41.38    5.21 
  17  -5   1   46.04    5.21 
 -17   5  -1   43.30    5.48 
 -17  -5  -1   45.22    5.76 
 -17   5  -1   41.11    6.58 
  17   5   1   50.97    6.58 
  17   5   1   46.86    5.76 
 -17  -5  -1   49.06    6.03 
  17  -5   1   45.77    5.76 
 -17   5  -1   41.38    5.48 
 -17  -5  -1   49.06    6.03 
  17  -5   1   45.77    5.76 
 -17   5  -1   46.31    5.76 
 -17  -5  -1   44.12    5.48 
 -16   5  -1    0.00    4.11 
  16  -5   1    1.64    5.21 
 -16   5  -1    1.92    5.21 
 -16  -5  -1    2.47    4.38 
 -16   5  -1    4.93    4.11 
  16   5   1   -0.27    4.93 
  16   5   1    2.19    4.38 
 -16  -5  -1    5.48    6.58 
  16  -5   1    2.74    4.93 
 -16   5  -1    1.64    5.48 
 -16  -5  -1    1.64    4.66 
  16  -5   1    1.64    4.38 
 -16   5  -1    1.37    6.03 
 -16  -5  -1    0.55    4.38 
 -15   5  -1    0.55    3.84 
  15  -5   1    0.00    3.84 
 -15   5  -1   -1.37    4.11 
 -15  -5  -1   -3.29    4.11 
 -15   5  -1    0.00    4.66 
  15   5   1   -1.10    4.11 
  15   5   1    0.00    4.11 
 -15  -5  -1   -1.10    4.38 
  15  -5   1    1.64    5.76 
 -15   5  -1    0.55    4.11 
 -15  -5  -1    1.92    6.30 
  15  -5   1    2.47    4.38 
 -15   5  -1    2.19    6.30 
 -15  -5  -1    1.10    4.11 
 -14   5  -1   13.15    4.11 
  14  -5   1   12.88    4.93 
 -14   5  -1   12.06    4.93 
 -14  -5  -1   14.25    6.03 
 -14   5  -1   12.88    4.93 
  14   5   1   15.62    4.38 
  14   5   1   16.17    4.38 
 -14  -5  -1   16.72    5.48 
  14  -5   1    9.87    4.93 
 -14   5  -1   11.24    4.11 
 -14  -5  -1   12.06    4.66 
  14  -5   1   12.33    4.38 
 -14   5  -1    8.77    4.38 
 -14  -5  -1   12.06    4.38 
 -13   5  -1   24.66    4.11 
  13  -5   1   28.78    4.11 
 -13   5  -1   23.57    5.21 
 -13  -5  -1   27.68    4.66 
 -13   5  -1   25.76    4.93 
  13   5   1   30.97    6.03 
  13   5   1   27.68    5.76 
 -13  -5  -1   24.12    4.66 
  13  -5   1   23.29    4.38 
 -13   5  -1   29.60    4.38 
  13  -5   1   25.21    4.66 
 -13   5  -1   26.31    4.66 
 -13  -5  -1   24.12    5.48 
  13   5   1   23.02    6.03 
 -12   5  -1    7.67    3.56 
  12  -5   1   10.14    4.93 
 -12   5  -1    7.95    4.38 
 -12  -5  -1    8.50    3.84 
 -12   5  -1    6.85    3.84 
  12   5   1    6.58    3.56 
  12   5   1    8.77    3.84 
 -12  -5  -1    8.77    5.21 
  12  -5   1   11.24    4.66 
 -12   5  -1    9.87    4.11 
  12  -5   1    6.58    3.84 
 -12   5  -1    9.04    5.21 
 -12  -5  -1    9.87    3.84 
  12   5   1    7.67    3.84 
 -11   5  -1  286.11   11.24 
  11  -5   1  284.19   11.24 
 -11   5  -1  293.78   11.51 
 -11  -5  -1  274.60   11.24 
  11   5   1  305.84   12.06 
 -11   5  -1  300.91   11.51 
  11   5   1  282.55   12.06 
 -11  -5  -1  285.29   11.78 
  11  -5   1  288.30   11.78 
 -11   5  -1  269.39   11.51 
  11  -5   1  280.90   11.78 
 -11   5  -1  279.81   11.51 
 -11  -5  -1  285.29   11.51 
  11   5   1  282.82   11.51 
 -10   5  -1    3.01    3.29 
  10  -5   1    2.74    3.01 
 -10   5  -1    2.74    2.74 
 -10  -5  -1    3.56    3.56 
  10   5   1    3.01    3.29 
 -10   5  -1    4.11    2.47 
  10   5   1    1.64    3.29 
 -10  -5  -1    3.56    3.56 
  10  -5   1    4.11    3.29 
 -10   5  -1    2.19    3.29 
  10  -5   1    1.64    4.66 
 -10   5  -1   -0.55    3.56 
 -10  -5  -1    1.10    3.56 
  10   5   1    3.84    4.38 
  -9   5  -1   92.90    5.21 
   9  -5   1  110.99    6.03 
  -9   5  -1   95.10    6.03 
  -9  -5  -1   93.73    5.48 
   9   5   1   98.11    6.03 
  -9   5  -1  101.67    5.76 
   9   5   1  109.89    6.03 
  -9  -5  -1   91.53    5.76 
   9  -5   1  108.25    6.03 
  -9   5  -1   97.56    6.03 
   9  -5   1  103.87    6.58 
  -9   5  -1  100.58    6.03 
  -9  -5  -1   96.74    6.58 
   9   5   1   95.64    5.76 
  -8   5  -1   80.02    4.93 
   8  -5   1   84.13    5.76 
  -8  -5  -1   90.16    5.21 
  -8  -5  -1   82.49    4.93 
  -8   5  -1   80.02    4.93 
  -8  -5  -1   78.93    4.93 
   8   5   1   80.84    5.21 
  -8   5  -1   78.65    5.21 
   8   5   1   80.57    5.21 
  -8  -5  -1   75.91    5.48 
   8  -5   1   78.38    5.48 
  -8   5  -1   86.05    5.21 
   8  -5   1   72.62    5.48 
  -8   5  -1   72.90    5.21 
  -8  -5  -1   74.27    6.03 
   8   5   1   77.28    5.21 
  -7   5  -1   21.65    3.56 
   7  -5   1   22.47    4.38 
  -7  -5  -1   23.02    3.01 
  -7   5  -1   25.76    4.11 
  -7  -5  -1   21.65    3.56 
   7   5   1   26.86    3.56 
  -7   5  -1   24.66    3.01 
   7   5   1   22.20    3.56 
  -7  -5  -1   23.84    3.84 
   7  -5   1   23.29    3.56 
  -7   5  -1   23.84    3.56 
   7  -5   1   26.58    4.11 
  -7   5  -1   20.55    3.84 
  -7  -5  -1   26.58    4.93 
   7   5   1   23.57    3.84 
   6   5   1  230.75    7.67 
  -6   5  -1  214.31    7.40 
   6  -5   1  228.01    8.22 
  -6  -5  -1  209.10    7.40 
  -6   5  -1  229.38    7.95 
  -6  -5  -1  211.02    7.95 
   6   5   1  224.72    8.22 
  -6   5  -1  220.34    7.40 
   6   5   1  236.51    8.77 
  -6  -5  -1  219.51    8.22 
   6  -5   1  222.53    7.95 
  -6   5  -1  227.19    7.95 
   6  -5   1  231.57    8.77 
  -6   5  -1  207.46    8.22 
  -6  -5  -1  227.46    8.22 
   6   5   1  231.30    8.22 
   5   5   1   12.06    3.01 
  -5   5  -1   10.96    3.29 
   5  -5   1   11.24    3.29 
  -5  -5  -1   12.06    2.19 
   5  -5   1   12.06    3.01 
  -5   5  -1   13.15    3.56 
  -5  -5  -1   11.24    3.01 
   5   5   1   10.14    3.29 
   5   5   1   11.24    3.29 
  -5  -5  -1   12.88    3.29 
   5  -5   1   10.41    3.29 
  -5   5  -1   14.80    4.11 
   5  -5   1   13.15    3.56 
  -5   5  -1   13.15    3.29 
  -5  -5  -1    9.04    3.56 
   5   5   1   12.61    3.84 
   4   5   1  266.10    8.50 
  -4   5  -1  258.43    9.04 
  -4  -5  -1  268.02    8.50 
   4  -5   1  268.84    8.50 
   4  -5   1  247.47    8.77 
  -4   5  -1  264.18    8.77 
  -4  -5  -1  256.51    8.50 
   4   5   1  278.98    8.77 
   4   5   1  283.64    9.32 
  -4  -5  -1  266.93    9.04 
   4  -5   1  272.95    9.59 
  -4   5  -1  278.16    9.04 
   4  -5   1  259.53    9.59 
  -4   5  -1  272.41    9.04 
  -4  -5  -1  260.62    8.77 
   4   5   1  266.10    9.04 
   3   5   1  259.25    8.22 
  -3   5  -1  254.32    8.22 
  -3  -5  -1  274.05    8.50 
   3  -5   1  265.28    9.04 
   3  -5   1  265.28    9.32 
  -3   5  -1  275.97    9.04 
  -3  -5  -1  267.20    8.77 
   3   5   1  270.76    8.50 
  -3  -5  -1  263.64    9.04 
   3  -5   1  272.95    9.04 
  -3  -5  -1  280.35    9.59 
  -3   5  -1  274.60    9.04 
   3  -5   1  262.27    9.04 
  -3   5  -1  272.41    9.04 
  -3  -5  -1  278.98    9.04 
   3   5   1  283.37    9.04 
   2   5   1  733.63   15.62 
  -2   5  -1  727.88   15.62 
  -2  -5  -1  773.92   16.72 
   2  -5   1  735.55   15.89 
   2  -5   1  706.78   15.89 
  -2   5  -1  755.83   16.17 
  -2  -5  -1  730.07   16.44 
   2   5   1  746.79   16.17 
   2  -5   1  722.94   16.44 
  -2  -5  -1  730.34   16.44 
   2  -5   1  756.38   16.72 
  -2  -5  -1  733.36   16.72 
   2  -5   1  730.62   16.44 
  -2   5  -1  756.93   16.99 
  -2  -5  -1  688.96   16.17 
   2   5   1  742.13   16.99 
   1   5   1  356.27   10.41 
  -1   5  -1  379.29   10.69 
  -1  -5  -1  392.71   10.41 
   1  -5   1  398.47   10.69 
   1  -5   1  379.01   10.96 
  -1   5  -1  407.79   10.96 
  -1  -5  -1  388.33   11.24 
   1   5   1  388.88   10.69 
  -1  -5  -1  377.37   11.24 
   1  -5   1  368.60   10.69 
   1  -5   1  370.79   11.51 
  -1  -5  -1  382.03   11.24 
   1  -5   1  391.62   11.78 
  -1   5  -1  405.05   11.24 
  -1  -5  -1  396.00   11.24 
   1   5   1  386.41   10.96 
   0   5   1   10.41    2.47 
   0   5  -1    9.59    2.47 
   0  -5  -1   11.24    3.29 
   0  -5   1   10.69    2.74 
   0  -5   1   10.41    3.29 
   0  -5  -1   11.51    3.29 
   0   5  -1   11.78    3.56 
   0   5   1   10.69    2.74 
   0  -5  -1   11.24    3.29 
   0  -5   1   10.96    3.84 
   0  -5  -1   11.51    3.01 
   0  -5   1   11.51    3.29 
   0  -5   1   11.51    3.29 
   0  -5  -1   12.06    4.11 
   0   5  -1    9.04    3.56 
   0   5   1   11.78    3.01 
  -1   5   1   17.27    2.74 
   1   5  -1   13.70    3.01 
   1  -5  -1   18.64    3.01 
  -1  -5   1   17.54    3.01 
  -1  -5   1   17.27    3.01 
   1  -5  -1   18.09    3.01 
   1   5  -1   18.64    3.01 
  -1   5   1   18.36    3.01 
  -1  -5   1   17.27    3.01 
   1  -5  -1   18.64    3.29 
  -1  -5   1   21.38    3.84 
  -1   5   1   20.55    3.29 
   1  -5  -1   12.61    3.56 
  -1  -5   1   17.54    3.56 
  -1   5   1   19.46    4.11 
   1   5  -1   18.09    4.38 
  -2   5   1   98.93    5.48 
   2  -5  -1  101.67    6.03 
   2   5  -1   95.37    5.21 
  -2  -5   1  103.04    5.76 
   2  -5  -1  104.69    6.03 
  -2  -5   1  101.95    6.03 
   2   5  -1  104.69    5.76 
  -2   5   1  107.70    5.76 
   2   5  -1  115.65    6.85 
  -2  -5   1  104.96    6.03 
   2  -5  -1  106.06    6.03 
  -2   5   1  111.81    6.30 
   2  -5  -1   88.52    6.03 
  -2  -5   1  101.95    6.03 
  -2   5   1  103.87    6.03 
   2   5  -1   99.21    6.03 
  -3   5   1  125.52    6.30 
   3  -5  -1  136.48    7.13 
   3   5  -1  129.63    6.58 
  -3  -5   1  138.94    6.58 
   3  -5  -1  142.23    7.13 
  -3  -5   1  137.03    6.85 
   3   5  -1  144.70    6.85 
  -3   5   1  145.79    6.85 
   3   5  -1  146.89    7.13 
  -3  -5   1  138.94    6.85 
   3  -5  -1  145.52    7.40 
  -3   5   1  114.28    6.85 
   3  -5  -1  139.22    7.67 
  -3  -5   1  126.89    6.85 
  -3   5   1  143.60    7.67 
   3   5  -1  146.89    7.13 
  -4   5   1   58.65    4.38 
   4  -5  -1   59.19    4.93 
   4   5  -1   54.81    4.38 
  -4  -5   1   57.28    4.11 
   4  -5  -1   52.62    4.11 
  -4  -5   1   59.19    4.38 
   4   5  -1   54.81    4.93 
  -4   5   1   59.74    4.11 
   4   5  -1   60.29    4.38 
  -4  -5   1   55.36    4.93 
   4  -5  -1   50.97    4.38 
  -4   5   1   55.91    4.38 
   4  -5  -1   53.44    5.21 
  -4   5   1   54.54    4.38 
  -4  -5   1   51.25    4.66 
   4   5  -1   55.08    4.93 
  -5   5   1  692.25   15.89 
   5  -5  -1  704.86   15.62 
   5   5  -1  702.94   15.35 
  -5  -5   1  702.94   15.62 
  -5  -5   1  706.23   15.89 
   5   5  -1  694.17   15.89 
  -5  -5   1  681.29   15.89 
   5  -5  -1  704.58   15.89 
  -5   5   1  694.44   15.89 
   5  -5  -1  692.25   16.44 
  -5  -5   1  682.11   15.89 
  -6   5   1   49.06    4.11 
   6   5  -1   48.78    3.56 
   6  -5  -1   53.17    4.66 
  -6  -5   1   47.41    3.56 
  -6  -5   1   48.23    4.38 
  -6   5   1   55.08    4.38 
   6   5  -1   59.19    5.76 
  -6   5   1    0.00    2.19 
   6   5  -1   50.97    4.38 
  -6  -5   1   46.86    4.38 
   6  -5  -1   42.75    4.11 
  -6   5   1   47.68    4.38 
   6  -5  -1   47.68    5.48 
  -6   5   1   53.99    4.66 
  -6  -5   1   49.33    5.21 
   6   5  -1   47.41    4.38 
  -7   5   1    7.95    3.84 
   7   5  -1    7.40    2.74 
   7  -5  -1    8.77    3.01 
  -7  -5   1    7.95    2.47 
  -7   5   1    9.59    3.84 
  -7  -5   1    5.76    3.29 
   7   5  -1    5.76    3.01 
  -7   5   1    0.00    2.47 
   7   5  -1    8.22    3.29 
  -7  -5   1    7.13    3.84 
   7  -5  -1    7.95    3.01 
  -7   5   1    7.13    4.11 
   7  -5  -1    6.85    4.38 
  -7   5   1    7.95    4.38 
  -7  -5   1    7.67    3.29 
   7   5  -1    6.85    4.11 
  -8   5   1   22.47    3.56 
   8   5  -1   23.29    3.01 
   8  -5  -1   23.57    3.56 
  -8  -5   1   24.94    3.29 
  -8   5   1   23.84    4.93 
  -8  -5   1   22.47    4.11 
  -8   5   1    0.00    3.84 
   8   5  -1   24.94    3.84 
   8   5  -1   22.75    3.84 
  -8  -5   1   22.20    4.93 
   8  -5  -1   20.55    4.11 
  -8   5   1   24.39    3.84 
   8  -5  -1   22.75    3.84 
  -8   5   1   20.55    3.84 
  -8  -5   1   25.76    3.84 
   8   5  -1   22.75    4.11 
  -9   5   1  143.33    7.95 
   9   5  -1  144.97    6.85 
   9  -5  -1  146.89    7.13 
  -9  -5   1  145.25    6.85 
  -9   5   1  157.58    7.67 
  -9  -5   1  131.00    7.13 
  -9   5   1  147.17    7.13 
   9   5  -1  152.10    7.40 
   9   5  -1  154.56    7.67 
  -9  -5   1  142.51    7.67 
   9  -5  -1  157.03    7.95 
  -9   5   1  114.83    7.40 
   9  -5  -1  141.41    7.40 
  -9   5   1  127.98    7.67 
  -9  -5   1  139.22    7.95 
   9   5  -1  139.77    7.40 
 -10   5   1   33.43    4.11 
  10   5  -1    1.10    3.01 
  10  -5  -1   32.61    4.11 
 -10  -5   1   34.26    5.76 
 -10   5   1   34.26    3.84 
  10   5  -1   33.43    4.11 
  10   5  -1   32.34    4.38 
 -10  -5   1   35.63    5.21 
  10  -5  -1   35.35    4.38 
 -10   5   1   35.90    5.48 
  10  -5  -1   36.72    4.38 
 -10   5   1   33.98    5.76 
 -10  -5   1   30.97    4.38 
  10   5  -1   35.35    4.38 
 -11   5   1   64.40    4.93 
  11  -5  -1   66.59    4.93 
 -11   5   1   58.37    4.93 
 -11  -5   1   61.39    5.48 
 -11   5   1   64.40    4.93 
  11   5  -1   67.69    6.30 
  11   5  -1   61.94    5.21 
 -11  -5   1   61.39    5.21 
  11  -5  -1   67.42    5.21 
 -11   5   1   60.84    6.30 
  11  -5  -1   59.19    5.76 
 -11   5   1   62.48    6.30 
 -11  -5   1   64.68    5.21 
  11   5  -1   64.95    5.48 
 -12   5   1  102.22    6.58 
  12  -5  -1  103.87    6.30 
 -12   5   1  107.15    6.03 
 -12  -5   1  106.88    6.30 
 -12   5   1  101.95    5.76 
  12   5  -1  108.52    7.13 
  12   5  -1  111.81    6.58 
 -12  -5   1   98.11    7.13 
  12  -5  -1  111.54    6.30 
 -12   5   1   98.66    6.03 
  12  -5  -1  109.62    7.40 
 -12   5   1  101.67    6.03 
 -12  -5   1  103.59    6.03 
  12   5  -1  101.95    6.03 
 -13   5   1    6.30    4.11 
  13  -5  -1    7.13    3.84 
 -13   5   1    7.13    4.11 
 -13  -5   1    8.22    4.38 
 -13   5   1    7.40    4.11 
  13   5  -1    7.67    5.21 
  13   5  -1    7.95    4.11 
 -13  -5   1    4.38    4.11 
  13  -5  -1    7.67    4.11 
 -13   5   1    6.85    3.84 
  13  -5  -1    7.95    5.48 
 -13   5   1    4.66    4.11 
 -13  -5   1    6.58    3.84 
  13   5  -1    4.66    3.84 
 -14   5   1  244.73   11.78 
  14  -5  -1  254.87   12.06 
 -14   5   1  228.28   11.78 
 -14  -5   1  230.75   11.51 
 -14   5   1  242.81   12.06 
  14   5  -1  236.78   12.06 
  14   5  -1  250.76   12.33 
 -14  -5   1  228.01   11.51 
  14  -5  -1  237.88   11.78 
 -14   5   1  225.82   11.51 
  14  -5  -1  225.82   12.06 
 -14   5   1  241.16   12.61 
 -14  -5   1  208.83   11.24 
  14   5  -1  232.39   12.33 
 -15   5   1   24.66    4.38 
  15  -5  -1   25.76    6.03 
 -15   5   1   24.39    5.21 
 -15  -5   1   19.73    6.03 
 -15   5   1   22.47    5.48 
  15   5  -1   24.94    6.03 
  15   5  -1   29.05    4.93 
 -15  -5   1   20.55    6.58 
  15  -5  -1   20.01    6.30 
 -15   5   1   22.75    4.66 
 -15  -5   1   22.47    4.93 
  15  -5  -1   23.02    4.93 
 -15   5   1   27.68    4.93 
 -15  -5   1   23.02    4.93 
 -16   5   1    7.67    4.38 
  16  -5  -1   10.41    4.38 
 -16   5   1    8.77    4.11 
 -16  -5   1   10.96    6.30 
 -16   5   1   10.14    5.48 
  16   5  -1    9.32    6.30 
  16   5  -1   12.33    4.93 
 -16  -5   1    8.50    5.48 
  16  -5  -1    8.50    4.38 
 -16   5   1   10.41    4.66 
 -16  -5   1    9.87    4.66 
  16  -5  -1    8.77    4.66 
 -16   5   1    6.30    4.66 
 -16  -5   1    9.59    4.66 
 -17   5   1    0.00    4.11 
  17  -5  -1    0.82    4.38 
 -17   5   1    0.27    5.21 
 -17  -5   1   -2.19    4.93 
 -17   5   1    1.37    5.48 
  17   5  -1   -1.92    5.76 
  17   5  -1   -0.55    4.93 
 -17  -5   1   -1.10    4.93 
  17  -5  -1   -0.82    4.66 
 -17   5   1   -1.37    4.66 
 -17  -5   1    2.47    6.03 
  17  -5  -1    0.27    4.66 
 -17   5   1   -0.82    4.66 
 -17  -5   1    2.74    4.66 
 -18   5   1    4.66    5.76 
  18  -5  -1    2.19    4.38 
 -18   5   1    2.47    6.03 
 -18  -5   1    1.10    5.21 
 -18   5   1    0.27    5.48 
  18   5  -1    4.93    4.66 
  18   5  -1    6.30    5.21 
  18  -5  -1    3.29    4.93 
 -18  -5   1    6.58    5.48 
 -18   5   1    5.48    4.93 
 -18  -5   1    4.66    5.21 
  18  -5  -1    4.11    5.48 
 -18   5   1    3.01    5.21 
 -18  -5   1    2.19    4.93 
 -19   5   1    0.82    6.03 
  19  -5  -1    3.01    4.93 
 -19  -5   1   -1.92    6.85 
  19   5  -1    4.66    5.21 
  19   5  -1    2.74    5.48 
  19  -5  -1    1.92    5.21 
 -19  -5   1    0.55    5.48 
 -19   5   1    0.00    4.93 
  19  -5  -1    2.47    5.21 
 -19  -5   1    1.37    5.48 
 -19   5   1    1.64    5.48 
 -19  -5   1    4.11    5.21 
 -20   5   1    4.11    7.13 
  20  -5  -1    7.13    5.76 
 -20  -5   1    6.30    5.76 
  20   5  -1    6.03    5.21 
  20   5  -1    8.50    6.30 
  20  -5  -1    7.13    5.48 
 -20  -5   1    8.22    5.76 
 -20   5   1    8.22    5.48 
  20  -5  -1    7.40    6.58 
 -20  -5   1    6.58    6.85 
 -20   5   1    6.58    6.03 
 -20  -5   1    9.87    5.76 
 -19   6  -1    0.00    4.93 
  19  -6   1    0.00    4.93 
 -19  -6  -1    1.64    5.48 
  19   6   1    0.55    6.58 
  19   6   1    0.27    5.21 
 -19  -6  -1    5.21    5.76 
  19  -6   1    2.19    5.76 
 -19   6  -1    0.27    6.30 
 -19  -6  -1    1.10    5.76 
  19  -6   1    1.64    5.48 
 -19   6  -1    0.00    5.48 
 -19  -6  -1    3.56    5.48 
 -18   6  -1    6.85    4.93 
  18  -6   1   11.51    4.93 
 -18  -6  -1    7.95    7.13 
 -18   6  -1   10.69    5.76 
  18   6   1   11.51    5.21 
  18   6   1   12.06    5.21 
 -18  -6  -1    7.95    6.03 
  18  -6   1   13.43    7.40 
 -18   6  -1    9.04    5.76 
 -18  -6  -1   11.51    5.76 
  18  -6   1    9.87    5.48 
 -18   6  -1    7.40    5.48 
 -18  -6  -1   10.41    5.21 
 -17   6  -1    3.01    4.38 
  17  -6   1    5.48    5.48 
 -17  -6  -1    5.76    4.93 
 -17   6  -1    3.56    6.58 
  17   6   1    5.21    4.93 
  17   6   1    1.92    4.93 
 -17  -6  -1    4.11    5.21 
  17  -6   1    2.74    4.93 
 -17   6  -1    0.55    4.93 
 -17  -6  -1    0.82    6.30 
  17  -6   1    2.74    5.48 
 -17   6  -1    0.55    6.30 
 -17  -6  -1    0.82    4.93 
 -16   6  -1   19.18    4.66 
  16  -6   1   24.94    4.66 
 -16  -6  -1   21.38    5.21 
 -16   6  -1   23.29    6.30 
  16   6   1   17.81    4.93 
  16   6   1   26.86    5.21 
 -16  -6  -1   21.92    5.21 
  16  -6   1   21.92    4.93 
 -16   6  -1   15.07    6.03 
 -16  -6  -1   19.46    5.21 
  16  -6   1   24.66    5.48 
 -16   6  -1   18.91    7.13 
 -16  -6  -1   21.38    5.21 
 -15   6  -1    4.66    4.38 
  15  -6   1    4.38    4.11 
 -15  -6  -1    0.82    6.03 
 -15   6  -1    2.74    4.93 
  15   6   1    1.92    5.48 
  15   6   1    0.82    5.21 
 -15  -6  -1    3.84    6.03 
  15  -6   1    1.92    4.38 
 -15   6  -1    3.01    4.38 
  15  -6   1    1.10    4.66 
 -15   6  -1    1.10    4.66 
 -15  -6  -1    4.66    4.66 
 -14   6  -1  158.68    9.59 
  14  -6   1  155.39    9.32 
 -14  -6  -1  146.07    9.32 
 -14   6  -1  157.03    9.87 
  14   6   1  155.66    9.59 
  14   6   1  162.79    9.87 
 -14  -6  -1  146.62    9.59 
  14  -6   1  147.71    9.32 
 -14   6  -1  149.36   10.14 
  14  -6   1  150.73   10.69 
 -14   6  -1  152.92    9.87 
 -14  -6  -1  151.28    9.59 
  14   6   1  142.23    9.04 
 -13   6  -1    0.27    3.84 
  13  -6   1    1.37    3.56 
 -13  -6  -1    3.01    4.11 
 -13   6  -1    4.11    4.66 
  13   6   1    0.55    3.84 
  13   6   1    2.74    4.11 
 -13  -6  -1    3.56    5.48 
  13  -6   1    1.37    3.84 
 -13   6  -1    2.74    3.84 
  13  -6   1    1.37    4.38 
 -13   6  -1    0.82    6.03 
 -13  -6  -1    2.19    5.21 
  13   6   1    0.55    4.93 
 -12   6  -1    0.82    3.56 
  12  -6   1    0.82    3.56 
 -12  -6  -1   -1.37    3.84 
 -12   6  -1    0.00    3.01 
  12   6   1   -0.27    4.93 
  12   6   1    0.27    5.21 
 -12  -6  -1    0.27    4.11 
  12  -6   1   -0.27    3.56 
 -12   6  -1    0.00    3.56 
  12  -6   1    0.00    4.11 
 -12   6  -1    0.82    4.11 
 -12  -6  -1   -0.27    3.84 
  12   6   1    0.27    4.11 
 -11   6  -1   20.55    4.11 
  11  -6   1   21.65    4.66 
 -11   6  -1   24.94    4.93 
 -11  -6  -1   19.73    4.38 
  11   6   1   25.49    4.38 
 -11   6  -1   26.58    3.56 
  11   6   1   25.76    4.38 
 -11  -6  -1   21.92    6.03 
  11  -6   1   22.75    4.93 
 -11   6  -1   23.57    4.11 
  11  -6   1   28.50    5.21 
 -11   6  -1   21.10    5.76 
 -11  -6  -1   20.83    4.66 
  11   6   1   27.13    6.30 
 -10   6  -1   24.12    4.66 
  10  -6   1   23.84    4.93 
 -10   6  -1   29.05    4.38 
 -10  -6  -1   24.94    4.38 
  10   6   1   23.84    4.11 
 -10   6  -1   26.03    4.38 
  10   6   1   26.86    4.38 
 -10  -6  -1   25.21    4.38 
  10  -6   1   26.86    4.38 
 -10   6  -1   25.49    4.11 
  10  -6   1   28.50    5.48 
 -10   6  -1   27.41    5.48 
 -10  -6  -1   24.94    4.38 
  10   6   1   23.57    4.38 
  -9   6  -1   95.10    6.85 
   9  -6   1   93.18    5.76 
  -9  -6  -1   99.75    6.03 
  -9  -6  -1   93.18    5.76 
  -9   6  -1   99.75    6.58 
  -9  -6  -1   87.97    5.76 
   9   6   1   90.44    5.76 
  -9   6  -1   91.81    5.76 
   9   6   1   94.27    7.13 
  -9  -6  -1   88.24    5.76 
   9  -6   1   92.90    6.58 
  -9   6  -1   89.61    6.85 
   9  -6   1   86.05    6.58 
  -9   6  -1   90.44    6.30 
  -9  -6  -1   90.16    6.03 
   9   6   1   87.70    5.76 
  -8   6  -1   15.89    3.56 
   8  -6   1   17.81    3.56 
  -8  -6  -1   18.36    3.29 
  -8  -6  -1   16.99    3.01 
  -8   6  -1   16.44    3.29 
  -8  -6  -1   16.17    3.84 
   8   6   1   13.15    4.11 
  -8   6  -1   14.25    3.56 
   8   6   1   16.72    5.21 
  -8  -6  -1   13.70    3.84 
   8  -6   1   16.99    3.56 
  -8   6  -1   16.17    3.56 
   8  -6   1   15.07    4.93 
  -8   6  -1   17.54    4.11 
  -8  -6  -1   16.44    3.84 
   8   6   1   16.72    4.11 
   7   6   1   25.76    3.29 
  -7   6  -1   28.78    3.84 
   7  -6   1   26.58    3.84 
  -7  -6  -1   26.58    3.29 
  -7   6  -1   29.32    3.56 
  -7  -6  -1   26.03    4.93 
   7   6   1   30.97    3.84 
  -7   6  -1   27.68    3.84 
   7   6   1   30.15    4.11 
  -7  -6  -1   29.60    5.21 
   7  -6   1   25.76    3.84 
  -7   6  -1   29.32    4.66 
   7  -6   1   27.68    4.66 
  -7   6  -1   30.97    5.21 
  -7  -6  -1   29.32    4.11 
   7   6   1   31.24    5.48 
   6   6   1   13.15    2.74 
  -6   6  -1   10.69    3.29 
   6  -6   1   14.25    3.29 
  -6  -6  -1   10.96    3.29 
  -6   6  -1   11.78    2.74 
  -6  -6  -1    9.59    3.29 
   6   6   1   11.78    3.29 
  -6   6  -1   11.51    3.01 
   6   6   1   10.14    3.56 
  -6  -6  -1   14.52    4.93 
   6  -6   1   11.51    3.29 
  -6   6  -1   12.06    4.11 
   6  -6   1   10.96    3.84 
  -6   6  -1   14.80    3.84 
  -6  -6  -1   11.51    3.56 
   6   6   1   12.88    4.93 
   5   6   1  146.07    6.30 
  -5   6  -1  144.70    7.13 
   5  -6   1  152.37    6.85 
  -5  -6  -1  134.83    5.76 
   5  -6   1  144.42    6.30 
  -5   6  -1  148.54    6.30 
  -5  -6  -1  140.59    6.85 
   5   6   1  150.45    7.13 
  -5  -6  -1  142.51    6.58 
   5  -6   1  148.54    6.58 
  -5   6  -1  138.40    6.85 
   5  -6   1  136.48    6.85 
  -5   6  -1  152.65    7.95 
  -5  -6  -1  132.64    6.85 
   5   6   1  147.17    7.67 
   4   6   1    1.92    2.47 
  -4   6  -1    0.27    2.74 
  -4  -6  -1    1.92    2.74 
   4  -6   1    1.64    3.29 
   4  -6   1    0.82    3.29 
  -4   6  -1    1.64    2.74 
  -4  -6  -1    3.29    4.11 
   4   6   1    2.19    2.74 
  -4  -6  -1    1.64    3.01 
   4  -6   1    1.10    3.01 
  -4   6  -1    2.47    3.29 
  -4  -6  -1    2.47    3.29 
   4  -6   1    3.29    4.66 
  -4   6  -1    1.10    3.29 
  -4  -6  -1    1.64    3.01 
   4   6   1    0.27    4.38 
   3   6   1  134.28    5.76 
  -3   6  -1  125.52    6.03 
  -3  -6  -1  135.38    6.03 
   3  -6   1  137.57    6.03 
   3  -6   1  118.66    6.30 
  -3   6  -1  141.41    6.58 
  -3  -6  -1  135.38    6.30 
   3   6   1  139.22    6.03 
   3  -6   1  128.53    6.03 
  -3  -6  -1  131.54    6.30 
   3  -6   1  126.89    6.58 
  -3  -6  -1  128.53    6.30 
   3  -6   1  132.64    6.58 
  -3   6  -1  132.64    6.58 
  -3  -6  -1  134.83    6.58 
   3   6   1  132.64    6.30 
   2   6   1   85.50    4.93 
  -2   6  -1   84.96    4.93 
  -2  -6  -1   86.87    5.48 
   2  -6   1   86.05    4.93 
   2  -6   1   91.26    5.76 
  -2  -6  -1   94.00    6.03 
  -2   6  -1   97.56    5.21 
   2   6   1   87.97    5.48 
   2  -6   1   91.53    6.03 
  -2  -6  -1   82.22    5.48 
   2  -6   1   88.52    6.03 
  -2  -6  -1   88.79    5.48 
   2  -6   1   89.89    5.48 
  -2  -6  -1   83.31    5.21 
  -2   6  -1   95.92    5.48 
   2   6   1   91.53    5.48 
   1   6   1  279.53    8.50 
  -1   6  -1  245.28    8.22 
  -1  -6  -1  289.95    9.04 
   1  -6   1  268.30    8.77 
   1  -6   1  280.35    9.32 
  -1  -6  -1  272.68    8.77 
  -1   6  -1  289.67    8.77 
   1   6   1  281.45    8.50 
  -1  -6  -1  259.80    9.32 
   1  -6   1  284.19    9.32 
   1  -6   1  278.16    9.59 
  -1  -6  -1  257.06    9.59 
   1  -6   1  263.91    9.32 
  -1  -6  -1  263.64    8.77 
  -1   6  -1  284.19    9.04 
   1   6   1  265.83    8.77 
   0   6   1   17.54    3.56 
   0   6  -1   18.36    3.01 
   0  -6  -1   16.99    3.56 
   0  -6   1   21.10    3.84 
   0  -6   1   20.01    3.56 
   0  -6  -1   21.65    3.84 
   0   6  -1   21.65    3.29 
   0   6   1   17.81    2.74 
   0  -6  -1   20.28    3.56 
   0  -6   1   19.73    3.29 
   0  -6  -1   20.01    3.56 
   0  -6   1   20.01    3.56 
   0  -6   1   15.89    4.11 
   0  -6  -1   16.72    3.56 
   0   6  -1   21.38    3.56 
   0   6   1   20.01    3.84 
  -1   6   1  171.56    6.58 
   1   6  -1  167.72    6.58 
   1  -6  -1  169.36    6.58 
  -1  -6   1  174.84    6.85 
  -1  -6   1  160.05    6.58 
   1  -6  -1  167.72    7.13 
   1   6  -1  173.47    6.85 
  -1   6   1  168.81    6.85 
   1  -6  -1  175.39    7.13 
  -1  -6   1  162.79    7.13 
   1  -6  -1  157.85    7.13 
  -1  -6   1  171.56    7.40 
   1  -6  -1  163.88    7.67 
  -1  -6   1  171.83    7.13 
   1   6  -1  176.49    7.67 
  -1   6   1  144.15    7.13 
  -2   6   1    3.29    2.74 
   2   6  -1    3.29    3.29 
   2  -6  -1    4.38    3.29 
  -2  -6   1    3.29    3.29 
   2  -6  -1    4.11    2.74 
  -2  -6   1    2.47    3.84 
   2   6  -1    5.76    3.84 
  -2   6   1    4.11    2.19 
  -2  -6   1    2.74    3.84 
   2  -6  -1    4.93    3.01 
  -2   6   1    4.38    4.11 
  -2  -6   1    4.66    3.01 
   2  -6  -1    4.66    3.01 
  -2  -6   1    3.56    3.29 
  -2   6   1    3.84    4.38 
   2   6  -1    2.74    3.56 
  -3   6   1  192.38    7.40 
   3   6  -1  188.55    7.40 
   3  -6  -1  198.96    7.67 
  -3  -6   1  188.00    7.40 
   3  -6  -1  217.32    7.95 
  -3  -6   1  193.21    7.95 
   3   6  -1  198.14    7.40 
  -3   6   1  198.14    7.13 
   3   6  -1  201.98    7.67 
  -3  -6   1  191.01    7.67 
   3  -6  -1  162.51    7.95 
  -3   6   1  206.63    7.67 
   3  -6  -1  193.75    8.22 
  -3  -6   1  190.46    7.67 
  -3   6   1  197.04    8.22 
   3   6  -1  190.19    7.40 
  -4   6   1   19.18    4.38 
   4   6  -1   20.83    3.84 
   4  -6  -1   19.18    3.29 
  -4  -6   1   18.09    3.29 
   4  -6  -1   19.46    3.29 
  -4  -6   1   19.46    3.56 
   4   6  -1   19.73    4.38 
  -4   6   1   21.38    3.01 
   4   6  -1   20.28    3.56 
  -4  -6   1   17.27    3.56 
   4  -6  -1   16.99    3.56 
  -4   6   1   21.38    3.56 
   4  -6  -1   18.64    3.84 
  -4  -6   1   16.99    4.11 
  -4   6   1   21.10    4.93 
   4   6  -1   17.27    4.66 
  -5   6   1  148.26    6.58 
   5   6  -1  145.52    6.03 
   5  -6  -1  152.37    6.30 
  -5  -6   1  147.44    6.30 
  -5  -6   1  148.54    7.40 
  -5   6   1  162.79    7.40 
   5   6  -1  152.92    6.85 
   5   6  -1  149.63    7.13 
  -5  -6   1  154.29    7.40 
   5  -6  -1  146.07    6.58 
  -5   6   1  146.89    7.40 
   5  -6  -1  141.14    6.85 
  -5   6   1  142.51    7.13 
  -5  -6   1  148.26    6.85 
   5   6  -1  144.15    7.13 
  -6   6   1   18.64    3.56 
   6   6  -1   17.27    3.56 
   6  -6  -1   16.99    3.29 
  -6  -6   1   17.54    2.74 
  -6  -6   1   14.25    4.93 
   6   6  -1   17.27    3.56 
  -6   6   1   18.91    3.29 
  -6   6   1    1.92    2.74 
   6   6  -1   16.72    3.56 
  -6  -6   1   18.64    4.93 
   6  -6  -1   15.62    4.11 
  -6   6   1   16.44    4.11 
   6  -6  -1   18.36    3.84 
  -6   6   1   15.62    3.84 
  -6  -6   1   14.80    3.56 
   6   6  -1   19.18    3.84 
  -7   6   1    3.84    4.38 
   7   6  -1    2.74    3.01 
   7  -6  -1    5.48    4.11 
  -7  -6   1    3.56    3.01 
  -7  -6   1    3.29    3.29 
   7   6  -1    3.56    3.29 
   7   6  -1    3.01    3.29 
  -7  -6   1    6.30    3.56 
   7  -6  -1    2.19    3.29 
  -7   6   1    1.92    3.29 
   7  -6  -1    2.74    3.56 
  -7   6   1    0.00    4.66 
  -7  -6   1    2.47    3.29 
   7   6  -1    2.47    3.29 
  -8   6   1    8.22    3.29 
   8   6  -1    7.67    2.47 
   8  -6  -1    8.77    3.29 
  -8  -6   1    8.77    3.01 
  -8  -6   1    9.87    3.84 
   8   6  -1   10.69    3.56 
   8   6  -1    8.50    3.56 
  -8  -6   1    7.67    3.56 
   8  -6  -1    9.59    3.84 
  -8   6   1    6.85    4.11 
   8  -6  -1    8.50    4.11 
  -8   6   1    9.32    3.84 
  -8  -6   1    7.67    4.93 
   8   6  -1   10.14    3.84 
  -9   6   1   13.98    4.93 
   9   6  -1   15.35    3.29 
   9  -6  -1   16.44    3.56 
  -9  -6   1   15.07    3.29 
  -9  -6   1   16.17    5.21 
   9   6  -1   13.43    4.66 
   9   6  -1   12.06    3.84 
  -9  -6   1   15.89    4.93 
   9  -6  -1   14.52    5.21 
  -9   6   1   12.88    4.66 
   9  -6  -1   14.52    4.11 
  -9   6   1   15.35    4.11 
  -9  -6   1    9.87    4.93 
   9   6  -1   11.51    3.84 
 -10   6   1    0.82    3.56 
  10   6  -1    1.10    2.74 
  10  -6  -1   -0.82    4.38 
 -10  -6   1    1.10    2.74 
 -10  -6   1    0.55    3.84 
  10   6  -1    2.47    4.93 
  10   6  -1    0.55    3.56 
 -10  -6   1    0.82    3.84 
  10  -6  -1    3.56    3.84 
 -10   6   1    1.10    3.56 
  10  -6  -1    0.55    3.84 
 -10   6   1    1.10    3.56 
 -10  -6   1    3.01    5.21 
  10   6  -1    0.00    3.56 
 -11   6   1   95.10    5.76 
  11  -6  -1  101.67    5.76 
 -11   6   1  106.88    6.30 
 -11  -6   1   97.29    6.03 
  11   6  -1   89.61    6.85 
  11   6  -1  103.32    6.85 
 -11  -6   1   99.48    7.13 
  11  -6  -1   88.52    6.03 
 -11   6   1   94.00    6.03 
  11  -6  -1   86.33    6.03 
 -11   6   1   94.27    6.03 
 -11  -6   1   90.98    6.03 
  11   6  -1   90.98    6.03 
 -12   6   1   21.10    5.21 
  12  -6  -1   24.39    5.48 
 -12   6   1   31.52    4.93 
 -12  -6   1   23.02    4.66 
 -12   6   1   23.57    4.11 
  12   6  -1   26.86    5.76 
  12   6  -1   27.41    4.66 
 -12  -6   1   19.46    4.66 
  12  -6  -1   23.84    4.38 
 -12   6   1   20.01    6.03 
  12  -6  -1   22.47    4.66 
 -12   6   1   22.75    4.66 
 -12  -6   1   24.12    4.66 
  12   6  -1   20.55    4.66 
 -13   6   1   20.55    4.38 
  13  -6  -1   22.47    4.38 
 -13  -6   1   22.47    6.03 
 -13   6   1   22.75    4.66 
  13   6  -1   22.47    5.48 
  13   6  -1   20.55    4.66 
 -13  -6   1   22.20    4.66 
  13  -6  -1   20.83    4.66 
 -13   6   1   20.83    4.66 
  13  -6  -1   22.75    4.66 
 -13   6   1   20.55    6.58 
 -13  -6   1   22.75    5.76 
  13   6  -1   19.18    4.66 
 -14   6   1   47.14    5.21 
  14  -6  -1   47.14    5.76 
 -14  -6   1   46.86    6.58 
 -14   6   1   46.04    5.48 
  14   6  -1   50.97    5.21 
  14   6  -1   49.06    6.85 
 -14  -6   1   41.38    6.58 
  14  -6  -1   44.12    5.21 
 -14   6   1   46.86    5.48 
  14  -6  -1   42.20    5.21 
 -14   6   1   44.40    5.48 
 -14  -6   1   46.31    5.21 
  14   6  -1   41.38    6.58 
 -15   6   1    7.40    5.21 
  15  -6  -1    5.21    4.11 
 -15  -6   1   12.06    4.93 
 -15   6   1    7.40    4.66 
  15   6  -1    5.48    4.66 
  15   6  -1    6.03    5.21 
 -15  -6   1   11.51    4.93 
  15  -6  -1    8.77    6.30 
 -15   6   1    8.77    4.93 
  15  -6  -1    6.30    4.66 
 -15   6   1    6.03    6.03 
 -15  -6   1    6.03    4.66 
  15   6  -1    7.95    4.66 
 -16   6   1    6.58    5.21 
  16  -6  -1    7.67    4.38 
 -16  -6   1   10.14    4.93 
 -16   6   1    8.22    4.66 
  16   6  -1    6.03    4.66 
  16   6  -1   10.14    4.93 
 -16  -6   1    9.32    4.93 
  16  -6  -1    7.40    4.66 
 -16   6   1    7.13    6.85 
 -16  -6   1    3.56    4.93 
  16  -6  -1    9.04    4.93 
 -16   6   1    5.76    4.93 
 -16  -6   1    7.95    6.03 
 -17   6   1    0.00    4.38 
  17  -6  -1    0.82    4.93 
 -17  -6   1    1.64    5.21 
  17   6  -1    0.00    4.66 
  17   6  -1    0.27    4.93 
 -17  -6   1    0.55    4.93 
  17  -6  -1    0.55    4.93 
 -17   6   1    0.82    4.93 
 -17  -6   1    3.01    6.30 
  17  -6  -1   -1.10    6.58 
 -17   6   1   -0.82    5.21 
 -17  -6   1    3.01    6.30 
 -18   6   1   -0.27    4.66 
  18  -6  -1   -0.27    6.58 
 -18  -6   1    0.00    5.48 
  18   6  -1    1.64    4.93 
  18   6  -1    1.64    5.21 
 -18  -6   1    0.82    7.67 
  18  -6  -1   -1.10    6.30 
 -18   6   1    2.47    5.21 
 -18  -6   1   -0.55    5.21 
  18  -6  -1    3.01    5.21 
 -18   6   1    0.00    5.48 
 -18  -6   1    3.84    6.30 
 -19   6   1    9.87    5.21 
  19  -6  -1   10.41    5.21 
 -19  -6   1    7.40    7.95 
  19   6  -1   10.14    5.48 
  19   6  -1    8.50    6.30 
 -19  -6   1   11.78    6.58 
  19  -6  -1   12.61    5.76 
 -19   6   1    9.59    5.76 
 -19  -6   1    7.13    7.13 
  19  -6  -1   13.98    6.03 
 -19   6   1    6.85    6.03 
 -19  -6   1   12.06    7.40 
 -18   7  -1   10.96    5.21 
  18  -7   1   10.14    4.93 
 -18  -7  -1    8.77    5.48 
  18   7   1   15.35    6.85 
  18   7   1    7.67    5.48 
 -18  -7  -1   10.69    7.13 
  18  -7   1    8.77    5.76 
 -18   7  -1    7.67    5.76 
 -18  -7  -1    7.40    5.48 
  18  -7   1    8.22    5.76 
 -18   7  -1    8.77    5.76 
 -18  -7  -1   10.69    5.48 
 -17   7  -1   -0.55    4.66 
  17  -7   1   -2.19    4.66 
 -17  -7  -1    0.27    7.67 
  17   7   1    1.37    4.93 
  17   7   1    1.92    5.21 
 -17  -7  -1   -0.27    5.21 
  17  -7   1    1.10    5.21 
 -17   7  -1   -2.47    7.13 
 -17  -7  -1    2.47    5.21 
  17  -7   1    1.64    5.48 
 -17   7  -1    1.10    5.48 
 -17  -7  -1    1.64    5.21 
 -16   7  -1    7.67    4.66 
  16  -7   1   10.14    4.66 
 -16  -7  -1    7.67    5.21 
  16   7   1    9.87    4.93 
  16   7   1    8.50    5.21 
 -16  -7  -1    8.50    5.21 
  16  -7   1   10.96    5.21 
 -16   7  -1    8.77    5.21 
  16  -7   1    5.21    5.21 
 -16   7  -1    7.13    6.58 
 -16  -7  -1    6.03    4.93 
 -15   7  -1   16.72    4.66 
  15  -7   1   20.01    4.66 
 -15   7  -1   16.72    6.30 
 -15  -7  -1   15.07    5.21 
 -15   7  -1   15.89    6.03 
  15   7   1   17.81    6.30 
  15   7   1   13.98    4.93 
 -15  -7  -1   12.61    6.30 
  15  -7   1   13.43    4.93 
 -15   7  -1   14.25    6.03 
  15  -7   1   14.25    7.13 
 -15   7  -1   15.07    5.48 
 -15  -7  -1   10.41    6.58 
  15   7   1   13.98    4.93 
 -14   7  -1    3.29    4.38 
  14  -7   1    6.58    4.11 
 -14   7  -1    6.85    6.03 
 -14  -7  -1    5.21    4.93 
 -14   7  -1    6.03    4.93 
  14   7   1    7.13    4.66 
  14   7   1    5.48    4.66 
 -14  -7  -1    4.11    4.66 
  14  -7   1    5.21    4.66 
 -14   7  -1    4.66    4.38 
  14  -7   1    6.30    4.93 
 -14   7  -1    5.76    4.93 
 -14  -7  -1    4.11    4.66 
  14   7   1    1.37    5.21 
 -13   7  -1   14.80    5.21 
  13  -7   1   17.81    4.38 
 -13   7  -1   15.89    4.38 
 -13  -7  -1   16.44    4.93 
 -13   7  -1   20.01    4.66 
  13   7   1   15.35    4.66 
  13   7   1   19.46    5.48 
 -13  -7  -1   15.35    6.30 
  13  -7   1   16.72    4.66 
 -13   7  -1   19.73    4.93 
  13  -7   1   16.72    4.93 
 -13   7  -1   15.89    6.85 
 -13  -7  -1   15.07    4.66 
  13   7   1   14.52    4.93 
 -12   7  -1  160.05   10.14 
  12  -7   1  167.72   10.41 
 -12   7  -1  191.01   11.24 
 -12  -7  -1  155.93    9.87 
 -12   7  -1  184.44   10.69 
  12   7   1  171.01   10.14 
  12   7   1  173.75   10.41 
 -12  -7  -1  155.39    9.87 
  12  -7   1  165.53   10.14 
 -12   7  -1  160.59   10.41 
  12  -7   1  169.64   11.24 
 -12   7  -1  155.93    9.87 
 -12  -7  -1  163.88   10.69 
  12   7   1  168.81   10.69 
 -11   7  -1    9.59    3.84 
  11  -7   1   10.41    3.84 
 -11   7  -1   12.06    4.93 
 -11  -7  -1    7.95    4.38 
  11   7   1    9.32    4.66 
 -11   7  -1   11.51    4.38 
  11   7   1    8.22    5.21 
 -11  -7  -1    8.50    5.48 
  11  -7   1   12.06    4.38 
 -11   7  -1   10.41    5.21 
  11  -7   1   10.69    4.66 
 -11   7  -1    9.87    5.21 
 -11  -7  -1    7.67    4.38 
  11   7   1    6.58    4.38 
 -10   7  -1   67.42    5.76 
  10  -7   1   66.87    5.48 
 -10   7  -1   77.28    6.58 
 -10  -7  -1   67.14    6.03 
  10   7   1   68.24    5.76 
 -10   7  -1   72.90    5.76 
  10   7   1   66.87    6.03 
 -10  -7  -1   63.58    6.03 
  10  -7   1   63.85    6.58 
 -10   7  -1   58.65    5.48 
  10  -7   1   63.03    5.76 
 -10   7  -1   68.51    7.40 
 -10  -7  -1   64.40    5.76 
  10   7   1   61.94    6.30 
  -9   7  -1   11.78    4.38 
   9  -7   1   13.15    3.84 
  -9  -7  -1   11.51    3.29 
  -9  -7  -1   12.61    3.29 
  -9   7  -1   14.25    3.84 
  -9  -7  -1   10.69    4.11 
   9   7   1   10.14    3.84 
  -9   7  -1   12.33    4.11 
   9   7   1   11.24    4.11 
  -9  -7  -1   14.52    4.38 
   9  -7   1   14.25    4.11 
  -9   7  -1   13.98    3.84 
   9  -7   1   12.06    4.38 
  -9   7  -1   15.62    4.38 
  -9  -7  -1   12.61    5.76 
   9   7   1   10.69    4.11 
   8   7   1  144.97    7.40 
  -8   7  -1  133.46    7.13 
   8  -7   1  145.79    7.40 
  -8  -7  -1  140.59    7.13 
  -8   7  -1  143.05    7.67 
  -8  -7  -1  129.63    7.95 
   8   7   1  135.93    7.40 
  -8   7  -1  135.93    6.85 
   8   7   1  151.55    7.95 
  -8  -7  -1  118.94    7.95 
   8  -7   1  135.93    7.67 
  -8   7  -1  134.28    7.40 
   8  -7   1  126.34    7.67 
  -8   7  -1  127.43    7.40 
  -8  -7  -1  119.21    7.95 
   8   7   1  145.79    7.95 
   7   7   1  140.59    7.13 
  -7   7  -1  133.19    7.13 
   7  -7   1  135.93    7.13 
  -7  -7  -1  124.14    6.85 
  -7   7  -1  140.86    7.13 
  -7  -7  -1  131.82    7.40 
   7   7   1  139.77    7.40 
  -7   7  -1  140.31    7.13 
   7   7   1  138.94    7.67 
  -7  -7  -1  129.63    7.67 
   7  -7   1  123.87    7.13 
  -7   7  -1  143.33    7.67 
   7  -7   1  137.03    7.67 
  -7   7  -1  136.48    8.77 
  -7  -7  -1  129.08    8.22 
   7   7   1  136.48    8.50 
   6   7   1    0.82    3.56 
  -6   7  -1    0.55    3.84 
   6  -7   1   -0.27    3.01 
  -6  -7  -1    0.00    2.47 
  -6   7  -1    0.00    3.56 
  -6  -7  -1   -1.64    4.38 
   6   7   1    1.10    4.38 
  -6  -7  -1    0.00    3.56 
   6  -7   1    0.55    3.29 
  -6   7  -1   -0.27    4.66 
  -6  -7  -1    1.37    3.84 
   6  -7   1    0.27    3.84 
  -6   7  -1   -0.82    4.38 
  -6  -7  -1    0.55    3.56 
   6   7   1    0.27    4.11 
   5   7   1   40.83    3.84 
  -5   7  -1   37.82    4.11 
   5  -7   1   40.29    4.11 
  -5  -7  -1   35.90    4.38 
   5  -7   1   39.19    4.93 
  -5   7  -1   36.17    4.66 
  -5  -7  -1   38.92    4.38 
   5   7   1   38.92    4.11 
  -5  -7  -1   35.08    4.38 
   5  -7   1   38.37    4.38 
  -5  -7  -1   39.46    5.48 
  -5   7  -1   39.19    4.38 
   5  -7   1   40.01    4.93 
  -5   7  -1   40.83    4.66 
  -5  -7  -1   38.37    4.66 
   5   7   1   35.90    4.38 
   4   7   1    0.00    3.56 
  -4   7  -1    0.00    3.29 
  -4  -7  -1    0.00    2.47 
   4  -7   1    0.55    4.38 
   4  -7   1    0.00    3.56 
  -4   7  -1    1.10    3.29 
  -4  -7  -1   -0.55    3.56 
   4   7   1    0.00    2.74 
   4  -7   1    0.00    3.01 
  -4  -7  -1    0.00    3.29 
   4  -7   1    1.37    4.66 
  -4  -7  -1    0.00    3.29 
   4  -7   1    0.00    3.56 
  -4   7  -1    1.37    4.93 
  -4  -7  -1    0.27    4.11 
   4   7   1    0.00    3.29 
   3   7   1   18.09    4.11 
  -3   7  -1   17.54    3.29 
  -3  -7  -1   16.99    3.84 
   3  -7   1   21.10    3.56 
   3  -7   1   16.17    3.56 
  -3  -7  -1   19.18    4.38 
  -3   7  -1   16.44    4.11 
   3   7   1   18.09    4.11 
   3  -7   1   19.18    3.84 
  -3  -7  -1   16.17    4.66 
   3  -7   1   17.27    3.84 
  -3  -7  -1   16.72    3.84 
   3  -7   1   20.01    4.11 
  -3   7  -1   18.09    3.84 
  -3  -7  -1   17.27    3.84 
   3   7   1   17.81    3.84 
   2   7   1   98.11    5.21 
  -2   7  -1   85.78    5.76 
  -2  -7  -1  100.85    5.76 
   2  -7   1   95.10    5.76 
   2  -7   1   96.47    5.48 
  -2  -7  -1   96.47    6.03 
  -2   7  -1  108.52    5.48 
   2   7   1  104.41    5.48 
   2  -7   1  100.85    5.76 
  -2  -7  -1   97.01    6.58 
   2  -7   1   95.37    5.76 
  -2  -7  -1  103.59    6.85 
   2  -7   1   92.90    5.76 
  -2  -7  -1  103.32    6.03 
  -2   7  -1   92.35    5.76 
   2   7   1   91.26    5.76 
   1   7   1  110.17    5.76 
  -1   7  -1  113.46    6.30 
  -1  -7  -1  115.65    6.58 
   1  -7   1  115.92    6.30 
   1  -7   1  113.73    6.85 
  -1  -7  -1  115.92    7.13 
  -1   7  -1  118.66    6.30 
   1   7   1  115.10    6.58 
  -1  -7  -1  113.18    7.40 
   1  -7   1  115.10    6.58 
   1  -7   1  116.20    6.58 
  -1  -7  -1  119.76    7.67 
   1  -7   1  124.97    7.13 
  -1  -7  -1  121.95    7.95 
  -1   7  -1  103.59    6.30 
   1   7   1  111.54    6.58 
   0   7   1    0.27    2.74 
   0   7  -1    3.29    2.74 
   0  -7  -1    3.01    4.11 
   0  -7   1    1.92    2.74 
   0  -7   1    3.01    3.29 
   0  -7  -1    1.64    3.29 
   0   7  -1    2.74    3.56 
   0   7   1    1.64    2.47 
   0  -7  -1    0.27    4.66 
   0  -7   1    1.92    3.01 
   0  -7  -1    1.64    4.66 
   0  -7   1    2.74    3.84 
   0  -7   1    3.29    3.29 
   0  -7  -1    1.92    4.11 
   0   7  -1    0.55    4.66 
   0   7   1    2.74    4.66 
  -1   7   1  218.97    9.04 
   1   7  -1  215.40    8.77 
   1  -7  -1  223.63    9.32 
  -1  -7   1  218.14    9.04 
  -1  -7   1  220.06    9.87 
   1  -7  -1  218.97    9.04 
   1   7  -1  217.87    9.32 
  -1   7   1  203.07    8.77 
   1  -7  -1  200.60    9.59 
  -1  -7   1  212.11    9.04 
   1  -7  -1  218.69    9.59 
  -1  -7   1  214.31    9.59 
   1  -7  -1  195.40    9.59 
  -1  -7   1  208.28    9.32 
   1   7  -1  222.80   10.14 
  -1   7   1  196.77    9.32 
  -2   7   1    3.84    3.01 
   2   7  -1    3.01    2.74 
   2  -7  -1    1.64    4.11 
  -2  -7   1    4.66    3.56 
   2  -7  -1    2.19    3.56 
  -2  -7   1    3.29    3.01 
   2   7  -1    1.64    3.01 
  -2   7   1    3.01    3.29 
  -2  -7   1    3.29    3.56 
   2  -7  -1    3.84    3.29 
  -2  -7   1    3.01    3.29 
   2  -7  -1    3.56    4.38 
  -2  -7   1    2.19    4.66 
  -2   7   1    2.19    3.29 
   2   7  -1    0.55    4.38 
  -3   7   1  443.96   14.80 
   3   7  -1  452.18   14.80 
   3  -7  -1  464.79   15.35 
  -3  -7   1  451.91   15.35 
   3  -7  -1  480.14   16.17 
  -3  -7   1  448.35   15.35 
   3   7  -1  467.80   15.35 
  -3   7   1  453.01   15.07 
  -3  -7   1  437.38   15.35 
  -3   7   1  454.92   15.62 
  -3  -7   1  451.36   15.62 
   3  -7  -1  431.90   15.07 
  -3  -7   1  429.71   15.07 
  -3   7   1  449.99   15.35 
   3   7  -1  449.44   15.89 
  -4   7   1   28.78    3.84 
   4   7  -1   26.86    3.29 
   4  -7  -1   23.02    3.84 
  -4  -7   1   26.31    4.11 
   4  -7  -1   24.39    3.84 
  -4  -7   1   23.84    4.11 
   4   7  -1   25.76    4.93 
  -4   7   1   24.94    3.56 
  -4  -7   1   24.39    4.93 
   4  -7  -1   24.66    4.11 
  -4   7   1   25.76    4.11 
   4  -7  -1   23.57    4.11 
  -4  -7   1   24.39    4.11 
  -4   7   1   20.28    5.21 
   4   7  -1   23.84    5.48 
  -5   7   1   12.61    3.56 
   5   7  -1   12.06    3.84 
   5  -7  -1   12.06    3.56 
  -5  -7   1   10.96    3.29 
  -5  -7   1   11.24    4.66 
   5   7  -1   15.35    4.66 
  -5   7   1   12.88    3.01 
   5   7  -1   14.25    3.84 
  -5  -7   1   13.98    3.84 
   5  -7  -1   10.69    3.56 
  -5   7   1   13.98    3.84 
   5  -7  -1   12.61    4.66 
  -5  -7   1   14.80    4.11 
  -5   7   1   12.88    3.84 
   5   7  -1   13.15    5.21 
  -6   7   1   75.64    6.03 
   6   7  -1   76.73    4.66 
   6  -7  -1   73.45    4.93 
  -6  -7   1   67.69    4.93 
  -6  -7   1   76.73    5.48 
   6   7  -1   80.84    5.48 
  -6   7   1   89.34    6.03 
   6   7  -1   75.91    5.48 
  -6  -7   1   72.08    5.48 
   6  -7  -1   79.47    6.03 
  -6   7   1   80.84    5.76 
   6  -7  -1   78.65    6.58 
  -6   7   1   81.94    6.85 
  -6  -7   1   77.01    5.76 
   6   7  -1   85.23    6.85 
  -7   7   1   46.86    4.38 
   7   7  -1   45.77    4.38 
   7  -7  -1   43.03    4.38 
  -7  -7   1   44.67    3.84 
  -7  -7   1   45.22    5.76 
   7   7  -1   42.75    4.66 
   7   7  -1   44.12    6.03 
  -7  -7   1   43.57    6.30 
   7  -7  -1   43.85    4.66 
  -7   7   1   44.12    4.66 
   7  -7  -1   46.31    5.21 
  -7   7   1   48.78    4.93 
  -7  -7   1   43.30    4.93 
   7   7  -1   43.03    6.03 
  -8   7   1   16.99    3.84 
   8   7  -1   16.17    3.56 
   8  -7  -1   14.80    3.84 
  -8  -7   1   16.44    3.84 
  -8  -7   1   18.09    4.38 
   8   7  -1   13.43    3.84 
   8   7  -1   14.80    5.21 
  -8  -7   1   15.07    4.11 
   8  -7  -1   17.81    4.11 
  -8   7   1   16.72    4.11 
   8  -7  -1   14.80    4.38 
  -8   7   1   13.15    4.11 
  -8  -7   1   12.06    4.11 
   8   7  -1   17.27    5.21 
  -9   7   1   -0.27    3.29 
   9   7  -1    0.27    2.74 
   9  -7  -1    0.27    4.93 
  -9  -7   1    0.00    3.01 
  -9  -7   1    0.82    4.11 
   9   7  -1    0.27    3.56 
   9   7  -1   -0.55    4.93 
  -9  -7   1    0.00    4.93 
   9  -7  -1   -1.64    3.56 
  -9   7   1    0.00    3.56 
   9  -7  -1   -0.55    4.66 
  -9   7   1   -1.10    3.84 
  -9  -7   1    1.64    3.84 
   9   7  -1    1.37    3.84 
 -10   7   1    1.37    3.84 
  10   7  -1    2.47    3.29 
  10  -7  -1    2.47    3.56 
 -10  -7   1    2.19    3.01 
 -10  -7   1    4.11    4.11 
  10   7  -1    4.11    3.84 
  10   7  -1    0.82    3.84 
 -10  -7   1    1.10    4.11 
  10  -7  -1    3.29    3.84 
 -10   7   1    3.56    4.38 
  10  -7  -1    1.37    5.48 
 -10   7   1   -0.27    4.11 
 -10  -7   1    3.01    4.11 
  10   7  -1    2.74    4.11 
  11   7  -1   57.00    5.76 
 -11   7   1   67.14    5.76 
  11  -7  -1   72.35    6.03 
 -11  -7   1   77.83    6.58 
 -11  -7   1   59.74    6.58 
  11   7  -1   67.14    5.48 
  11   7  -1   66.05    5.48 
 -11  -7   1   60.02    7.13 
  11  -7  -1   69.33    6.30 
 -11   7   1   59.19    5.48 
  11  -7  -1   57.28    7.13 
 -11   7   1   66.87    5.76 
 -11  -7   1   61.39    6.03 
  11   7  -1   64.68    5.48 
 -12   7   1   10.14    5.48 
  12  -7  -1   13.43    5.21 
 -12  -7   1   13.15    4.66 
  12   7  -1   11.51    4.93 
  12   7  -1   12.33    4.38 
 -12  -7   1   11.24    4.66 
  12  -7  -1   10.96    4.38 
 -12   7   1   11.24    4.38 
  12  -7  -1   12.33    6.58 
 -12   7   1   11.24    4.66 
 -12  -7   1    9.87    4.38 
  12   7  -1    9.32    4.38 
 -13   7   1   11.78    4.38 
  13  -7  -1   15.07    4.38 
 -13  -7   1   13.43    4.93 
  13   7  -1   15.07    6.03 
  13   7  -1    9.59    5.21 
 -13  -7   1    8.77    4.66 
  13  -7  -1   10.41    4.66 
 -13   7   1    9.04    4.38 
  13  -7  -1   11.51    6.03 
 -13   7   1    7.95    6.58 
 -13  -7   1   12.33    4.66 
  13   7  -1   12.33    6.03 
 -14   7   1   38.92    5.48 
  14  -7  -1   42.48    6.30 
 -14  -7   1   35.08    5.76 
  14   7  -1   40.83    7.13 
  14   7  -1   41.38    5.76 
 -14  -7   1   43.85    7.13 
  14  -7  -1   37.00    5.76 
 -14   7   1   34.53    5.48 
  14  -7  -1   33.98    5.76 
 -14   7   1   39.74    6.03 
 -14  -7   1   34.26    5.48 
  14   7  -1   38.92    5.76 
 -15   7   1   15.35    6.03 
  15  -7  -1   18.91    4.66 
 -15  -7   1   14.52    5.21 
  15   7  -1   14.80    4.93 
  15   7  -1   18.36    5.21 
 -15  -7   1   13.98    5.21 
  15  -7  -1   16.72    5.21 
 -15   7   1   18.36    5.21 
  15  -7  -1   13.70    5.21 
 -15   7   1   17.81    7.40 
 -15  -7   1   13.15    5.48 
  15   7  -1   12.61    5.48 
 -16   7   1    2.74    4.66 
  16  -7  -1    1.92    4.66 
 -16  -7   1    1.10    5.21 
  16   7  -1    2.74    4.93 
  16   7  -1    1.64    4.93 
 -16  -7   1    3.01    5.21 
  16  -7  -1    0.00    6.85 
 -16   7   1    3.84    4.93 
  16  -7  -1    0.00    4.93 
 -16   7   1    3.01    5.21 
 -16  -7   1    4.11    4.93 
  16   7  -1    3.56    4.93 
 -17   7   1   38.64    5.48 
  17  -7  -1   43.57    6.58 
 -17  -7   1   43.57    6.03 
  17   7  -1   38.64    5.76 
  17   7  -1   40.29    7.95 
 -17  -7   1   38.92    6.03 
  17  -7  -1   46.31    6.03 
 -17   7   1   43.03    7.95 
 -17  -7   1   38.09    6.03 
  17  -7  -1   42.20    6.03 
 -17   7   1   43.85    6.30 
 -17  -7   1   42.75    6.03 
 -18   7   1    3.29    4.93 
  18  -7  -1    3.84    4.93 
 -18  -7   1    0.27    6.58 
  18   7  -1    2.47    4.93 
  18   7  -1    4.93    7.67 
 -18  -7   1    6.58    5.76 
  18  -7  -1    5.76    5.48 
 -18   7   1    5.21    5.48 
 -18  -7   1    3.84    5.48 
  18  -7  -1    4.11    6.30 
 -18   7   1    4.93    5.76 
 -18  -7   1    5.76    5.48 
 -17   8  -1    4.93    4.93 
  17  -8   1    6.58    4.93 
 -17  -8  -1    3.84    5.48 
  17   8   1    6.03    5.21 
  17   8   1    4.93    5.48 
 -17  -8  -1    3.56    5.48 
  17  -8   1    4.93    7.13 
 -17   8  -1    5.21    5.48 
 -17  -8  -1    4.66    5.48 
  17  -8   1    4.66    6.30 
 -17   8  -1    7.67    6.03 
 -17  -8  -1    2.19    6.85 
 -16   8  -1   19.46    5.21 
  16  -8   1   27.13    5.21 
 -16  -8  -1   19.73    5.76 
  16   8   1   18.64    5.48 
  16   8   1   20.55    6.85 
 -16  -8  -1   25.21    5.76 
  16  -8   1   21.10    7.67 
 -16   8  -1   21.10    5.76 
  16  -8   1   20.55    5.76 
 -16   8  -1   19.46    6.03 
 -16  -8  -1   18.64    5.76 
  16   8   1   27.13    5.76 
 -15   8  -1    6.03    6.03 
  15  -8   1    9.59    4.66 
 -15  -8  -1    9.04    5.48 
  15   8   1   14.80    6.58 
  15   8   1   12.88    5.21 
 -15  -8  -1    5.48    6.58 
  15  -8   1   11.78    6.58 
 -15   8  -1    9.87    5.21 
  15  -8   1   10.14    5.48 
 -15   8  -1   14.80    6.85 
 -15  -8  -1   10.96    5.21 
  15   8   1    7.40    5.21 
 -14   8  -1    2.47    4.66 
  14  -8   1    0.27    4.38 
 -14  -8  -1    3.29    6.58 
  14   8   1    5.76    4.93 
  14   8   1   -0.55    4.66 
 -14  -8  -1    3.29    4.93 
  14  -8   1   -1.92    6.03 
 -14   8  -1   -0.55    4.66 
  14  -8   1    0.82    4.93 
 -14   8  -1    0.82    5.21 
 -14  -8  -1    2.74    4.93 
  14   8   1    0.00    6.30 
 -13   8  -1   33.71    5.21 
  13  -8   1   34.80    6.03 
 -13   8  -1   34.26    5.76 
 -13  -8  -1   35.35    7.40 
 -13   8  -1   33.16    4.93 
  13   8   1   35.35    5.21 
  13   8   1   36.17    6.85 
 -13  -8  -1   29.05    5.48 
  13  -8   1   30.42    7.13 
 -13   8  -1   33.71    5.21 
  13  -8   1   26.31    5.48 
 -13   8  -1   30.97    5.48 
 -13  -8  -1   32.89    5.48 
  13   8   1   36.45    6.03 
 -12   8  -1    6.03    4.38 
  12  -8   1    7.40    4.11 
 -12   8  -1    7.13    5.21 
 -12  -8  -1    6.30    6.03 
 -12   8  -1    3.56    4.93 
  12   8   1    3.01    6.03 
  12   8   1    5.48    4.66 
 -12  -8  -1    6.58    4.66 
  12  -8   1    5.76    6.03 
 -12   8  -1    4.66    4.38 
  12  -8   1    3.56    5.48 
 -12   8  -1    7.95    4.93 
 -12  -8  -1    6.58    4.66 
  12   8   1    6.85    5.48 
 -11   8  -1    4.66    6.03 
  11  -8   1    2.19    4.11 
 -11   8  -1    5.21    4.38 
 -11  -8  -1    5.48    4.66 
  11   8   1    6.58    4.38 
 -11   8  -1    7.95    4.11 
  11   8   1    7.40    5.48 
 -11  -8  -1    6.85    4.66 
  11  -8   1    4.93    4.93 
 -11   8  -1    3.56    4.38 
  11  -8   1    4.66    4.66 
 -11   8  -1    6.58    6.03 
 -11  -8  -1    5.76    4.66 
  11   8   1    4.38    4.38 
 -10   8  -1    1.37    3.84 
  10  -8   1   -0.27    3.84 
 -10  -8  -1    0.27    3.56 
 -10  -8  -1    0.27    3.56 
 -10   8  -1    0.27    4.11 
 -10  -8  -1    1.10    4.38 
  10   8   1    1.64    4.11 
 -10   8  -1    0.27    4.11 
  10   8   1    0.00    4.11 
 -10  -8  -1    1.64    6.03 
  10  -8   1    0.27    4.11 
 -10   8  -1    0.00    4.11 
  10  -8   1    0.82    4.38 
 -10   8  -1    1.92    4.66 
 -10  -8  -1   -0.27    4.93 
  10   8   1   -0.27    4.93 
  -9   8  -1    9.87    3.84 
   9  -8   1   11.51    3.84 
  -9  -8  -1   13.98    3.84 
  -9  -8  -1   12.61    3.84 
  -9   8  -1   12.06    4.66 
  -9  -8  -1   13.70    4.66 
   9   8   1   13.43    4.66 
  -9   8  -1   12.06    4.11 
   9   8   1   13.70    4.38 
  -9  -8  -1    9.04    4.38 
   9  -8   1   10.96    4.11 
  -9   8  -1   14.25    4.38 
   9  -8   1   10.96    4.66 
  -9   8  -1   10.69    4.66 
  -9  -8  -1   13.43    4.38 
   9   8   1   10.96    4.38 
   8   8   1   60.57    5.21 
  -8   8  -1   48.51    5.76 
   8  -8   1   51.25    4.93 
  -8  -8  -1   52.89    4.93 
  -8   8  -1   58.92    5.48 
  -8  -8  -1   54.26    6.30 
   8   8   1   56.73    5.21 
  -8   8  -1   58.10    4.66 
  -8  -8  -1   56.45    5.48 
   8  -8   1   52.89    5.76 
  -8   8  -1   56.73    5.21 
  -8  -8  -1   53.17    5.48 
   8  -8   1   56.18    6.58 
  -8   8  -1   55.08    5.48 
  -8  -8  -1   56.18    5.48 
   8   8   1   55.36    6.85 
   7   8   1    0.55    2.74 
  -7   8  -1    1.37    3.56 
   7  -8   1   -0.27    3.56 
  -7  -8  -1    0.82    3.01 
  -7   8  -1    0.00    3.01 
  -7  -8  -1    2.19    4.11 
   7   8   1    0.00    4.93 
  -7   8  -1    0.27    2.74 
  -7  -8  -1   -0.27    4.11 
   7  -8   1    0.27    3.56 
  -7   8  -1   -1.10    5.21 
  -7  -8  -1   -2.19    4.11 
   7  -8   1   -1.37    6.03 
  -7   8  -1    0.55    4.11 
  -7  -8  -1   -0.55    4.11 
   7   8   1   -0.82    4.11 
   6   8   1   21.10    3.56 
  -6   8  -1   20.01    5.48 
   6  -8   1   17.81    3.84 
  -6  -8  -1   20.28    3.56 
   6  -8   1   21.10    3.56 
  -6  -8  -1   21.10    4.38 
  -6   8  -1   21.10    4.66 
   6   8   1   22.47    4.11 
  -6  -8  -1   20.83    4.38 
   6  -8   1   19.18    5.48 
  -6  -8  -1   22.20    4.66 
  -6   8  -1   22.75    4.38 
   6  -8   1   27.95    4.93 
  -6   8  -1   23.84    4.66 
  -6  -8  -1   21.65    4.38 
   6   8   1   19.18    4.38 
   5   8   1  180.05    9.32 
  -5   8  -1  173.47    9.04 
   5  -8   1  187.72    9.59 
  -5  -8  -1  161.96    8.77 
   5  -8   1  177.86    9.59 
  -5  -8  -1  177.04    9.59 
  -5   8  -1  181.42    9.32 
   5   8   1  186.08    9.59 
   5  -8   1  182.24   10.41 
  -5  -8  -1  164.98   10.14 
   5  -8   1  169.91    9.32 
  -5  -8  -1  171.01   10.14 
   5  -8   1  179.50    9.87 
  -5   8  -1  173.20    9.59 
  -5  -8  -1  182.24    9.87 
   5   8   1  168.54    9.87 
   4   8   1  204.72    9.04 
  -4   8  -1  189.37    8.50 
   4  -8   1  192.93    9.32 
  -4  -8  -1  183.07    8.50 
   4  -8   1  177.31    9.04 
  -4  -8  -1  181.42    8.77 
  -4   8  -1  187.72    9.04 
   4   8   1  190.74    8.77 
   4  -8   1  188.82    9.04 
  -4  -8  -1  180.33    8.77 
   4  -8   1  208.28    9.87 
  -4  -8  -1  197.86    9.59 
   4  -8   1  191.01    9.32 
  -4  -8  -1  172.38    9.32 
  -4   8  -1  176.49    9.32 
   4   8   1  184.71    9.04 
   3   8   1   82.22    4.93 
  -3   8  -1   77.01    5.21 
  -3  -8  -1   78.93    4.93 
   3  -8   1   83.31    5.21 
   3  -8   1   65.77    5.76 
  -3  -8  -1   79.20    5.48 
  -3   8  -1   81.12    4.93 
   3   8   1   78.38    5.76 
   3  -8   1   77.28    6.03 
  -3  -8  -1   73.17    5.48 
   3  -8   1   76.73    6.03 
  -3  -8  -1   83.31    6.30 
   3  -8   1   73.99    5.76 
  -3  -8  -1   81.39    5.76 
  -3   8  -1   77.56    5.76 
   3   8   1   77.56    5.48 
   2   8   1   66.87    5.76 
  -2   8  -1   63.85    4.66 
  -2  -8  -1   67.69    4.93 
   2  -8   1   68.24    6.03 
   2  -8   1   64.40    6.03 
  -2  -8  -1   68.79    5.21 
  -2   8  -1   65.50    4.66 
   2   8   1   64.40    4.66 
   2  -8   1   69.88    5.21 
  -2  -8  -1   62.48    5.21 
   2  -8   1   66.87    5.48 
  -2  -8  -1   61.39    5.48 
   2  -8   1   63.31    6.30 
  -2  -8  -1   61.94    6.03 
  -2   8  -1   63.31    6.30 
   2   8   1   58.65    6.03 
   1   8   1    6.58    3.29 
  -1   8  -1    4.66    3.29 
  -1  -8  -1    4.93    3.29 
   1  -8   1    6.03    3.29 
   1  -8   1    5.76    3.56 
  -1  -8  -1    4.38    3.29 
  -1   8  -1    5.48    3.84 
   1   8   1    5.48    3.84 
  -1  -8  -1    5.21    4.93 
   1  -8   1    5.76    3.56 
   1  -8   1    4.11    3.56 
  -1  -8  -1    1.64    3.84 
   1  -8   1    4.66    3.84 
  -1  -8  -1    3.29    3.84 
  -1   8  -1    4.38    3.84 
   1   8   1    3.56    3.84 
   0   8   1   45.77    4.38 
   0   8  -1   45.77    4.93 
   0  -8  -1   43.03    4.38 
   0  -8   1   42.75    4.38 
   0  -8   1   43.57    5.48 
   0  -8  -1   45.49    4.38 
   0   8  -1   44.12    4.93 
   0   8   1   45.49    4.11 
   0  -8  -1   43.85    4.93 
   0  -8   1   41.11    4.93 
   0  -8  -1   44.12    6.03 
   0  -8   1   43.57    4.93 
   0  -8   1   42.20    4.93 
   0  -8  -1   42.20    4.93 
   0   8  -1   43.30    4.66 
   0   8   1   36.72    4.66 
  -1   8   1  263.09   11.24 
   1   8  -1  254.87   10.69 
   1  -8  -1  258.70   10.96 
  -1  -8   1  261.99   10.69 
  -1  -8   1  258.16   10.96 
   1  -8  -1  255.14   10.69 
   1   8  -1  255.69   10.96 
  -1   8   1  259.80   10.41 
   1  -8  -1  254.04   10.96 
  -1  -8   1  242.26   10.69 
   1  -8  -1  222.53   10.69 
  -1  -8   1  252.13   10.96 
   1  -8  -1  253.50   11.51 
  -1  -8   1  245.00   10.69 
  -1   8   1  246.92   10.96 
   1   8  -1  262.81   11.78 
  -2   8   1  110.44    7.13 
   2   8  -1  117.57    6.58 
   2  -8  -1  118.94    6.85 
  -2  -8   1  109.89    6.30 
   2  -8  -1  124.69    7.40 
  -2  -8   1  112.09    6.85 
   2   8  -1  114.83    6.85 
  -2   8   1  110.72    6.03 
   2  -8  -1  109.07    7.67 
  -2  -8   1  100.85    6.03 
   2  -8  -1   94.82    6.58 
  -2  -8   1  109.07    6.85 
   2  -8  -1   96.74    6.85 
  -2  -8   1  106.33    6.85 
  -2   8   1  110.17    6.85 
   2   8  -1  112.91    7.13 
  -3   8   1   16.72    4.93 
   3   8  -1   16.99    3.56 
   3  -8  -1   16.44    3.84 
  -3  -8   1   16.72    3.84 
   3  -8  -1   16.72    4.38 
  -3  -8   1   16.17    4.11 
   3   8  -1   15.89    4.11 
  -3   8   1   17.54    3.56 
   3  -8  -1   18.64    4.11 
  -3  -8   1   19.18    4.11 
   3  -8  -1   10.41    5.21 
  -3  -8   1   18.64    4.11 
   3  -8  -1   16.17    4.93 
  -3  -8   1   11.78    4.38 
  -3   8   1   17.27    4.93 
   3   8  -1   16.99    4.11 
  -4   8   1  636.62   21.10 
   4   8  -1  651.14   20.83 
   4  -8  -1  628.12   20.55 
  -4  -8   1  636.07   20.83 
   4  -8  -1  666.76   21.65 
  -4  -8   1  601.27   20.83 
   4   8  -1  691.43   22.20 
  -4   8   1  670.60   21.65 
  -4  -8   1  628.40   20.83 
   4  -8  -1  641.28   21.92 
  -4  -8   1  645.94   21.65 
  -4   8   1  668.68   21.92 
   4  -8  -1  637.44   21.65 
  -4  -8   1  617.71   21.10 
  -4   8   1  635.25   21.10 
   4   8  -1  655.80   21.65 
  -5   8   1  362.02   15.62 
   5   8  -1  393.81   16.44 
   5  -8  -1  362.84   16.17 
  -5  -8   1  352.70   15.35 
   5  -8  -1  405.05   17.27 
  -5  -8   1  380.11   16.72 
   5   8  -1  397.92   17.27 
  -5   8   1  405.32   17.27 
  -5  -8   1  392.99   17.27 
   5  -8  -1  368.87   16.17 
  -5   8   1  373.80   16.44 
  -5  -8   1  363.39   16.44 
   5  -8  -1  377.09   16.99 
  -5  -8   1  327.22   15.89 
  -5   8   1  367.78   16.17 
   5   8  -1  361.75   16.44 
  -6   8   1  127.43    6.30 
   6   8  -1  117.57    6.58 
   6  -8  -1  131.00    7.40 
  -6  -8   1  123.60    5.76 
  -6  -8   1  128.26    6.85 
   6   8  -1  130.72    6.85 
  -6   8   1  146.34    9.32 
   6   8  -1  138.94    8.50 
  -6  -8   1  125.24    7.95 
   6  -8  -1  127.16    6.58 
  -6   8   1  131.27    6.58 
   6  -8  -1  128.53    7.67 
  -6  -8   1  129.08    6.85 
  -6   8   1  144.42    9.59 
   6   8  -1  125.24    6.58 
  -7   8   1   33.16    5.21 
   7   8  -1   39.19    5.21 
   7  -8  -1   32.06    5.48 
  -7  -8   1   36.17    4.11 
  -7  -8   1   34.26    4.93 
   7   8  -1   34.53    5.48 
   7   8  -1   39.19    4.93 
  -7  -8   1   38.92    4.93 
   7  -8  -1   39.74    4.93 
  -7   8   1   42.75    4.93 
   7  -8  -1   38.09    6.30 
  -7   8   1   36.45    4.93 
  -7  -8   1   33.98    4.93 
   7   8  -1   36.45    4.93 
  -8   8   1   40.29    4.66 
   8   8  -1   44.94    4.38 
   8  -8  -1   43.03    5.21 
  -8  -8   1   38.92    4.93 
  -8  -8   1   41.11    6.03 
   8   8  -1   39.19    6.03 
   8   8  -1   47.96    5.21 
  -8  -8   1   43.30    6.58 
   8  -8  -1   43.30    4.93 
  -8   8   1   39.74    4.93 
   8  -8  -1   35.63    6.58 
  -8   8   1   42.48    5.21 
  -8  -8   1   44.12    5.21 
   8   8  -1   37.54    4.93 
  -9   8   1   -0.27    3.84 
   9   8  -1   -0.27    3.29 
   9  -8  -1    1.37    3.84 
  -9  -8   1    0.00    3.01 
  -9  -8   1    0.82    4.38 
   9   8  -1    0.55    5.21 
   9   8  -1   -0.27    4.11 
  -9  -8   1   -1.10    4.11 
   9  -8  -1    0.82    4.11 
  -9   8   1    1.10    4.11 
   9  -8  -1    0.00    5.76 
  -9   8   1   -1.64    4.11 
  -9  -8   1    1.64    4.11 
   9   8  -1    0.27    4.93 
  10   8  -1    4.38    3.56 
 -10   8   1    3.01    3.84 
  10  -8  -1    3.01    3.84 
 -10  -8   1    5.48    3.84 
 -10  -8   1    6.58    5.21 
  10   8  -1    4.93    4.11 
  10   8  -1    3.56    4.93 
 -10  -8   1    2.74    4.38 
  10  -8  -1    5.76    4.38 
 -10   8   1    3.84    4.11 
  10  -8  -1    3.29    6.03 
 -10   8   1    1.37    4.38 
 -10  -8   1    4.66    5.48 
  10   8  -1    6.30    5.76 
  11   8  -1    0.27    3.84 
 -11   8   1    0.55    4.11 
  11  -8  -1    0.00    4.93 
 -11  -8   1    0.82    3.84 
 -11  -8   1    0.55    4.66 
  11   8  -1    0.00    4.11 
  11   8  -1    0.00    4.38 
 -11  -8   1    2.19    5.76 
  11  -8  -1   -1.10    4.38 
 -11   8   1    0.27    4.11 
  11  -8  -1    1.37    5.48 
 -11   8   1    1.10    6.58 
 -11  -8   1    0.00    4.38 
  11   8  -1   -3.84    4.38 
 -12   8   1    1.92    4.38 
  12  -8  -1    1.37    4.11 
 -12  -8   1    1.10    4.93 
  12   8  -1   -0.27    4.38 
  12   8  -1   -0.27    4.66 
 -12  -8   1    1.92    4.66 
  12  -8  -1    3.01    4.66 
 -12   8   1   -0.55    4.38 
  12  -8  -1    1.10    4.93 
 -12   8   1    1.64    4.66 
 -12  -8   1    0.27    4.66 
  12   8  -1    3.29    4.66 
 -13   8   1    2.74    4.38 
  13  -8  -1   -1.10    4.38 
 -13  -8   1   -1.37    7.13 
  13   8  -1    3.01    4.66 
  13   8  -1    3.29    4.66 
 -13  -8   1    0.55    4.66 
  13  -8  -1    1.64    4.66 
 -13   8   1    2.74    5.76 
  13  -8  -1    3.29    4.93 
 -13   8   1   -2.47    4.93 
 -13  -8   1    0.55    6.58 
  13   8  -1   -2.47    4.66 
 -14   8   1   37.00    5.21 
  14  -8  -1   45.77    6.03 
 -14  -8   1   32.06    7.40 
  14   8  -1   30.15    5.48 
  14   8  -1   38.37    6.30 
 -14  -8   1   33.98    7.67 
  14  -8  -1   34.26    5.48 
 -14   8   1   32.89    5.48 
  14  -8  -1   34.53    5.76 
 -14   8   1   24.94    6.58 
 -14  -8   1   33.98    5.76 
  14   8  -1   29.05    6.03 
 -15   8   1   -0.27    6.03 
  15  -8  -1    1.10    4.66 
 -15  -8   1    2.74    6.30 
  15   8  -1    1.37    5.48 
  15   8  -1    1.92    5.21 
 -15  -8   1   -1.10    5.21 
  15  -8  -1    1.64    6.85 
 -15   8   1    1.10    4.93 
  15  -8  -1    0.27    5.21 
 -15   8   1    2.74    5.48 
 -15  -8   1    1.10    5.21 
  15   8  -1    3.84    6.85 
 -16   8   1    4.93    4.93 
  16  -8  -1    3.29    4.93 
 -16  -8   1    7.95    7.13 
  16   8  -1    5.21    6.30 
  16   8  -1    8.22    5.48 
 -16  -8   1    2.19    5.48 
  16  -8  -1    4.66    5.48 
 -16   8   1    0.82    5.21 
  16  -8  -1    5.76    7.13 
 -16   8   1    5.76    5.76 
 -16  -8   1    6.58    6.85 
  16   8  -1    2.19    5.21 
 -17   8   1   11.24    5.21 
  17  -8  -1   16.44    5.21 
 -17  -8   1    9.32    7.95 
  17   8  -1   12.88    5.48 
  17   8  -1   15.62    5.48 
 -17  -8   1   12.06    6.03 
  17  -8  -1   12.88    5.76 
 -17   8   1    7.95    7.40 
  17  -8  -1   10.96    6.03 
 -17   8   1   11.51    7.95 
 -17  -8   1    9.04    5.76 
  17   8  -1    8.77    7.13 
 -16   9  -1   24.39    5.48 
  16  -9   1   26.58    7.67 
 -16  -9  -1   21.92    7.95 
  16   9   1   27.95    7.13 
  16   9   1   33.98    7.40 
 -16  -9  -1   23.29    6.03 
  16  -9   1   24.39    6.85 
 -16   9  -1   26.58    6.30 
  16  -9   1   24.94    6.03 
 -16   9  -1   27.95    6.85 
 -16  -9  -1   24.39    6.03 
  16   9   1   23.57    7.40 
 -15   9  -1    0.55    4.93 
  15  -9   1    1.10    4.93 
 -15  -9  -1    0.55    6.30 
  15   9   1   -0.82    5.21 
  15   9   1   -1.92    5.21 
 -15  -9  -1    1.10    5.48 
  15  -9   1   -1.10    7.40 
 -15   9  -1    1.37    5.76 
  15  -9   1   -0.82    5.48 
 -15   9  -1    0.00    5.76 
 -15  -9  -1    0.00    5.21 
  15   9   1    2.47    5.21 
 -14   9  -1   14.80    5.21 
  14  -9   1   12.06    4.93 
 -14  -9  -1   12.61    6.03 
  14   9   1   13.98    5.21 
  14   9   1   15.89    5.48 
 -14  -9  -1   13.70    6.03 
  14  -9   1   11.24    7.40 
 -14   9  -1   12.88    6.58 
  14  -9   1   14.25    5.76 
 -14   9  -1   14.25    5.76 
 -14  -9  -1   12.61    6.58 
  14   9   1   13.70    5.48 
 -13   9  -1   57.28    6.85 
  13  -9   1   51.52    6.30 
 -13  -9  -1   39.46    6.58 
  13   9   1   52.62    7.67 
  13   9   1   59.47    7.95 
 -13  -9  -1   45.49    6.03 
  13  -9   1   43.30    7.40 
 -13   9  -1   52.34    6.03 
  13  -9   1   56.45    6.58 
 -13   9  -1   43.85    6.30 
 -13  -9  -1   53.17    6.03 
  13   9   1   51.25    6.30 
 -12   9  -1    0.55    4.66 
  12  -9   1    0.82    4.38 
 -12  -9  -1    3.29    6.58 
  12   9   1    2.47    4.66 
  12   9   1    0.00    4.66 
 -12  -9  -1   -1.37    4.66 
  12  -9   1    0.00    6.58 
 -12   9  -1    0.27    4.66 
  12  -9   1   -0.82    7.40 
 -12   9  -1   -0.27    5.21 
 -12  -9  -1   -0.27    6.58 
  12   9   1   -2.47    4.93 
 -11   9  -1    3.01    4.38 
  11  -9   1    3.29    4.38 
 -11  -9  -1    1.92    4.93 
  11   9   1    2.19    4.66 
 -11  -9  -1    3.84    6.03 
  11  -9   1    1.92    5.48 
 -11   9  -1    3.01    6.03 
 -11  -9  -1    4.11    4.93 
  11  -9   1    4.66    5.21 
 -11   9  -1    1.92    5.21 
 -11  -9  -1    3.01    4.93 
  11   9   1    1.64    6.30 
 -10   9  -1   29.32    4.93 
  10  -9   1   34.26    4.93 
 -10  -9  -1   31.79    4.93 
 -10  -9  -1   32.06    4.93 
 -10  -9  -1   25.76    5.48 
 -10   9  -1   33.16    5.48 
  10   9   1   30.42    4.93 
 -10   9  -1   32.61    4.93 
 -10  -9  -1   25.76    5.21 
  10  -9   1   26.86    5.21 
 -10   9  -1   26.86    6.30 
 -10  -9  -1   27.68    6.03 
  10  -9   1   27.41    5.48 
 -10   9  -1   29.32    6.85 
 -10  -9  -1   27.95    5.21 
  10   9   1   25.76    5.21 
  -9   9  -1   61.66    6.03 
   9  -9   1   70.16    6.30 
  -9  -9  -1   57.82    5.48 
  -9  -9  -1   67.96    6.03 
  -9  -9  -1   51.25    6.03 
  -9   9  -1   61.39    6.58 
   9   9   1   56.45    6.03 
  -9   9  -1   66.05    6.58 
  -9  -9  -1   58.37    6.30 
   9  -9   1   57.00    6.30 
  -9   9  -1   59.19    7.40 
  -9  -9  -1   58.37    6.58 
   9  -9   1   58.65    7.67 
  -9   9  -1   55.36    6.30 
  -9  -9  -1   54.54    6.85 
   9   9   1   51.80    7.13 
   8   9   1    1.92    4.66 
  -8   9  -1    0.82    4.11 
   8  -9   1    1.37    3.84 
  -8  -9  -1    0.00    3.56 
  -8  -9  -1    1.64    4.66 
  -8   9  -1   -0.55    4.66 
   8   9   1    0.27    5.21 
  -8   9  -1    1.10    4.11 
  -8  -9  -1   -0.27    4.38 
   8  -9   1   -0.55    4.11 
  -8  -9  -1    2.74    4.66 
  -8   9  -1    1.37    4.93 
   8  -9   1    2.74    4.93 
  -8   9  -1    2.47    4.66 
  -8  -9  -1    2.74    4.38 
   8   9   1    1.10    4.38 
   7   9   1   26.86    4.66 
  -7   9  -1   21.10    4.38 
   7  -9   1   24.12    4.38 
  -7  -9  -1   22.75    4.93 
  -7  -9  -1   23.57    5.48 
  -7   9  -1   28.78    5.21 
   7   9   1   25.49    4.66 
  -7   9  -1   27.68    4.93 
   7  -9   1   25.76    4.66 
  -7  -9  -1   23.29    4.93 
   7  -9   1   20.83    6.03 
  -7  -9  -1   26.03    4.93 
   7  -9   1   23.57    5.21 
  -7   9  -1   24.94    4.93 
  -7  -9  -1   26.58    4.93 
   7   9   1   18.91    5.48 
   6   9   1  107.15    7.67 
  -6   9  -1  104.41    6.85 
   6  -9   1  113.18    7.40 
  -6  -9  -1  103.87    6.85 
   6  -9   1  113.46    7.40 
  -6  -9  -1  100.03    7.13 
  -6   9  -1  109.07    7.67 
   6   9   1   93.73    7.40 
   6  -9   1  110.99    7.40 
  -6  -9  -1   90.98    6.85 
   6  -9   1   89.89    7.67 
  -6  -9  -1  105.24    7.67 
   6  -9   1  102.22    9.04 
  -6   9  -1   95.92    7.40 
  -6  -9  -1  100.85    7.40 
   6   9   1   94.82    7.13 
   5   9   1   70.98    5.76 
  -5   9  -1   69.33    6.30 
   5  -9   1   63.85    5.21 
  -5  -9  -1   63.58    4.93 
   5  -9   1   70.70    6.58 
  -5  -9  -1   71.80    6.30 
  -5   9  -1   69.06    6.03 
   5   9   1   70.70    5.76 
   5  -9   1   61.94    6.30 
  -5  -9  -1   68.24    6.30 
   5  -9   1   70.16    6.30 
  -5  -9  -1   67.69    6.30 
   5  -9   1   69.33    6.58 
  -5  -9  -1   65.50    5.76 
  -5   9  -1   68.51    6.30 
   5   9   1   63.85    6.58 
   4   9   1   31.79    4.11 
  -4   9  -1   26.03    4.11 
   4  -9   1   29.05    5.76 
  -4  -9  -1   29.60    4.11 
   4  -9   1   24.94    4.11 
  -4  -9  -1   23.84    4.93 
  -4   9  -1   30.15    4.11 
   4   9   1   25.76    4.38 
   4  -9   1   29.87    4.66 
  -4  -9  -1   26.03    4.93 
   4  -9   1   28.50    4.93 
  -4  -9  -1   23.84    5.76 
   4  -9   1   28.50    4.93 
  -4  -9  -1   28.50    6.03 
  -4   9  -1   25.21    6.03 
   4   9   1   28.23    4.93 
   3   9   1   75.64    5.76 
  -3   9  -1   64.95    5.48 
  -3  -9  -1   64.68    5.48 
   3  -9   1   74.27    5.76 
   3  -9   1   70.70    6.03 
  -3  -9  -1   72.90    6.03 
  -3   9  -1   72.62    5.48 
   3   9   1   72.90    6.30 
   3  -9   1   69.33    6.03 
  -3  -9  -1   67.69    6.03 
   3  -9   1   70.98    6.30 
  -3  -9  -1   71.53    6.30 
   3  -9   1   73.72    7.67 
  -3  -9  -1   67.69    6.30 
  -3   9  -1   62.21    5.48 
   3   9   1   65.77    6.85 
   2   9   1   64.68    6.30 
  -2   9  -1   62.76    6.03 
  -2  -9  -1   67.14    5.76 
   2  -9   1   69.88    6.85 
   2  -9   1   68.79    6.58 
  -2  -9  -1   68.51    6.58 
  -2   9  -1   67.14    5.48 
   2   9   1   68.51    5.48 
   2  -9   1   61.94    5.76 
  -2  -9  -1   60.84    5.48 
   2  -9   1   60.84    5.48 
  -2  -9  -1   61.11    5.48 
   2  -9   1   66.32    6.03 
  -2  -9  -1   58.10    5.76 
  -2   9  -1   60.57    5.48 
   2   9   1   57.82    5.48 
   1   9   1   23.84    4.11 
  -1   9  -1   26.58    4.93 
  -1  -9  -1   29.60    4.11 
   1  -9   1   27.68    4.38 
   1  -9   1   25.49    5.48 
  -1  -9  -1   26.58    5.48 
  -1   9  -1   25.76    4.11 
   1   9   1   27.13    4.38 
  -1  -9  -1   26.03    5.48 
   1  -9   1   26.03    4.38 
   1  -9   1   26.03    4.66 
  -1  -9  -1   22.20    4.66 
   1  -9   1   22.20    5.48 
  -1  -9  -1   27.95    6.03 
  -1   9  -1   25.49    5.76 
   1   9   1   22.75    5.48 
   0   9   1   45.77    4.66 
   0   9  -1   38.09    4.66 
   0  -9  -1   40.83    4.66 
   0  -9   1   43.30    4.66 
   0  -9   1   44.40    4.93 
   0  -9  -1   42.48    4.66 
   0   9  -1   45.77    4.93 
   0   9   1   41.66    4.93 
   0  -9  -1   40.83    4.93 
   0  -9   1   43.03    5.76 
   0  -9  -1   38.09    6.30 
   0  -9   1   45.77    5.21 
   0  -9   1   49.33    5.48 
   0  -9  -1   52.89    5.48 
   0   9  -1   43.85    5.21 
   0   9   1   41.93    5.21 
  -1   9   1    6.03    4.66 
   1   9  -1    9.87    4.11 
   1  -9  -1    8.77    3.84 
  -1  -9   1    8.22    3.56 
   1  -9  -1   11.24    4.93 
  -1  -9   1    8.50    5.76 
   1   9  -1    8.50    4.66 
  -1   9   1   10.96    4.38 
   1  -9  -1    7.95    5.21 
  -1  -9   1    9.04    4.11 
   1  -9  -1    9.59    4.38 
  -1  -9   1    9.04    4.38 
  -1  -9   1    9.04    4.93 
   1  -9  -1    9.04    5.48 
   1   9  -1    7.40    5.48 
  -1   9   1   10.14    4.38 
  -2   9   1    4.93    4.38 
   2   9  -1    6.30    4.66 
   2  -9  -1    5.76    3.56 
  -2  -9   1    7.13    3.56 
   2  -9  -1    6.30    4.11 
  -2  -9   1    5.21    5.48 
   2   9  -1    8.22    5.21 
  -2   9   1    6.30    3.56 
   2  -9  -1    4.11    4.11 
  -2  -9   1    4.38    4.93 
   2  -9  -1    5.76    4.38 
  -2  -9   1    9.32    4.38 
   2  -9  -1    7.40    4.38 
  -2  -9   1    3.56    4.38 
  -2   9   1   10.41    4.38 
   2   9  -1    7.67    4.11 
  -3   9   1   10.96    4.38 
   3   9  -1   10.69    3.56 
   3  -9  -1   11.24    5.48 
  -3  -9   1   10.41    4.38 
   3  -9  -1   13.98    4.11 
  -3  -9   1    9.32    4.11 
   3   9  -1    9.87    4.11 
  -3   9   1   11.78    3.84 
   3  -9  -1   11.24    4.38 
  -3  -9   1   10.14    4.38 
   3  -9  -1   10.96    4.38 
  -3  -9   1    9.59    4.38 
   3  -9  -1    7.67    4.38 
  -3  -9   1    7.95    5.48 
  -3   9   1   10.41    4.38 
   3   9  -1    8.50    4.93 
  -4   9   1    0.27    4.38 
   4   9  -1    1.64    3.29 
   4  -9  -1    1.92    3.84 
  -4  -9   1    1.10    3.29 
   4  -9  -1    0.82    4.11 
  -4  -9   1    2.19    4.11 
   4   9  -1    1.92    3.84 
  -4   9   1    2.19    3.56 
   4  -9  -1    2.74    4.11 
  -4  -9   1    1.37    5.21 
   4  -9  -1    0.00    4.11 
  -4  -9   1    1.37    4.11 
   4  -9  -1    1.92    4.38 
  -4  -9   1    2.74    4.93 
  -4   9   1    3.56    4.11 
   4   9  -1    0.00    4.11 
  -5   9   1   15.62    5.48 
   5   9  -1   18.36    3.84 
   5  -9  -1   24.39    4.38 
  -5  -9   1   17.54    3.84 
   5  -9  -1   17.81    4.11 
  -5  -9   1   19.18    4.66 
   5   9  -1   20.01    4.38 
  -5   9   1   17.81    3.84 
  -5  -9   1   19.73    4.66 
   5  -9  -1   17.27    4.66 
  -5  -9   1   17.81    5.76 
  -5   9   1   18.36    4.66 
   5  -9  -1   22.47    6.58 
  -5  -9   1   21.10    4.93 
  -5   9   1   16.99    6.03 
   5   9  -1   13.70    4.38 
  -6   9   1    5.21    3.84 
   6   9  -1    6.03    4.93 
   6  -9  -1    6.58    3.84 
  -6  -9   1    4.11    3.56 
  -6  -9   1    3.29    4.38 
   6   9  -1    4.38    3.84 
  -6   9   1    6.30    6.58 
  -6   9   1   -1.64    6.30 
  -6  -9   1    1.37    6.03 
   6  -9  -1    3.29    5.76 
  -6   9   1    3.01    4.38 
  -6  -9   1    4.38    4.38 
   6  -9  -1    4.11    6.03 
  -6  -9   1    5.48    4.66 
  -6   9   1    4.66    4.38 
   6   9  -1    5.48    6.03 
  -7   9   1   11.51    4.11 
   7   9  -1   18.09    4.66 
   7  -9  -1   15.07    4.38 
  -7  -9   1   11.51    4.66 
  -7  -9   1   14.52    4.93 
   7   9  -1   14.25    5.48 
  -7  -9   1   12.33    4.66 
   7  -9  -1   10.96    6.30 
  -7   9   1   12.06    5.76 
  -7  -9   1   15.35    4.93 
   7  -9  -1   13.98    4.93 
  -7  -9   1   14.80    4.93 
  -7   9   1   15.35    4.66 
   7   9  -1   13.15    4.66 
  -8   9   1    7.40    4.66 
   8   9  -1   10.14    3.84 
   8  -9  -1    7.95    4.11 
  -8  -9   1    8.50    4.38 
  -8  -9   1    9.87    4.93 
   8   9  -1    7.95    4.38 
   8   9  -1   10.96    4.66 
  -8  -9   1   10.69    4.66 
   8  -9  -1    6.58    5.76 
  -8   9   1    8.50    6.30 
   8  -9  -1    9.04    4.93 
  -8  -9   1    8.77    4.66 
  -8   9   1    7.95    4.66 
   8   9  -1    6.85    4.66 
  -9   9   1    8.22    4.38 
   9   9  -1    6.30    3.84 
   9  -9  -1    7.40    4.38 
  -9  -9   1    8.50    4.93 
  -9  -9   1    5.76    6.85 
   9   9  -1    7.95    4.38 
   9   9  -1    7.40    5.21 
  -9  -9   1    3.29    6.03 
   9  -9  -1    4.11    6.03 
  -9   9   1    9.32    6.30 
   9  -9  -1    6.85    4.93 
  -9  -9   1    6.30    4.66 
  -9   9   1    3.01    6.03 
   9   9  -1    7.40    4.66 
  10   9  -1    2.47    4.38 
 -10   9   1    0.00    4.11 
  10  -9  -1    4.11    5.48 
 -10  -9   1    1.64    4.38 
 -10  -9   1   -1.10    4.93 
  10   9  -1   -0.55    4.38 
  10   9  -1    3.84    4.66 
 -10  -9   1    1.37    4.66 
  10  -9  -1    1.92    4.93 
 -10   9   1   -1.92    5.76 
  10  -9  -1    3.29    4.93 
 -10   9   1    1.10    6.30 
 -10  -9   1    4.66    6.30 
  10   9  -1    0.00    4.66 
 -11   9   1    7.13    5.76 
  11  -9  -1    4.11    4.93 
 -11  -9   1    5.21    4.93 
  11   9  -1    4.66    4.66 
  11   9  -1    4.11    4.66 
 -11  -9   1    0.00    4.66 
  11  -9  -1    4.38    4.93 
 -11   9   1    3.29    4.93 
  11  -9  -1    4.38    6.30 
 -11   9   1    5.48    5.21 
 -11  -9   1    0.27    4.93 
  11   9  -1    1.10    6.30 
 -12   9   1   35.35    5.21 
  12  -9  -1   30.15    4.93 
 -12  -9   1   28.23    5.76 
  12   9  -1   31.24    6.30 
  12   9  -1   37.00    7.13 
 -12  -9   1   26.86    5.76 
  12  -9  -1   33.16    6.03 
 -12   9   1   30.97    5.48 
  12  -9  -1   28.50    7.13 
 -12   9   1   27.13    5.76 
 -12  -9   1   29.87    5.76 
  12   9  -1   28.50    5.48 
 -13   9   1   73.72    6.03 
  13  -9  -1   75.91    6.03 
 -13  -9   1   70.98    6.58 
  13   9  -1   78.65    7.40 
  13   9  -1   72.08    6.58 
 -13  -9   1   65.77    7.13 
  13  -9  -1   72.35    6.58 
 -13   9   1   65.77    6.30 
  13  -9  -1   70.98    6.85 
 -13   9   1   81.39    8.22 
 -13  -9   1   72.62    6.58 
  13   9  -1   60.29    6.58 
 -14   9   1   10.96    4.93 
  14  -9  -1   12.06    4.93 
 -14  -9   1   13.43    6.03 
  14   9  -1    5.76    5.21 
  14   9  -1   10.41    6.58 
 -14  -9   1   11.24    5.48 
  14  -9  -1    9.59    6.58 
 -14   9   1   10.14    5.76 
  14  -9  -1    4.66    5.48 
 -14   9   1   10.69    5.76 
 -14  -9   1    8.50    5.48 
  14   9  -1   15.89    5.76 
 -15   9   1    8.22    5.21 
  15  -9  -1    6.58    4.93 
 -15  -9   1    8.22    5.76 
  15   9  -1    9.59    5.21 
  15   9  -1    2.47    5.48 
 -15  -9   1    8.77    5.48 
  15  -9  -1    1.92    7.13 
 -15   9   1    5.48    5.48 
  15  -9  -1    9.32    5.76 
 -15   9   1    7.67    6.58 
 -15  -9   1    2.19    5.48 
  15   9  -1    4.66    5.48 
 -16   9   1    0.27    6.58 
  16  -9  -1    0.27    5.76 
 -16  -9   1    1.64    6.03 
  16   9  -1   -1.37    5.48 
  16   9  -1   -1.37    5.48 
 -16  -9   1   -0.55    5.48 
  16  -9  -1    0.00    5.76 
 -16   9   1    0.82    5.48 
  16  -9  -1   -0.82    6.58 
 -16   9   1   -1.37    6.03 
 -16  -9   1   -0.82    6.85 
  16   9  -1    1.92    5.48 
 -14  10  -1   10.41    5.21 
  14 -10   1    5.21    6.30 
 -14 -10  -1    7.67    6.03 
  14  10   1    7.40    7.13 
 -14 -10  -1    5.76    5.76 
  14 -10   1    8.77    7.13 
 -14  10  -1    6.30    5.76 
 -14 -10  -1   13.15    6.03 
  14 -10   1    5.21    5.76 
 -14  10  -1    7.95    6.58 
 -14 -10  -1    7.67    5.76 
  14  10   1    8.77    6.30 
 -13  10  -1   82.49    7.13 
  13 -10   1  102.49    6.58 
 -13 -10  -1   93.45    7.67 
  13  10   1  109.07    7.13 
 -13 -10  -1   90.71    7.13 
  13 -10   1  102.22    8.50 
 -13  10  -1   95.92    7.67 
 -13 -10  -1  101.67    9.59 
  13 -10   1   83.59    8.77 
 -13  10  -1   96.74    7.40 
 -13 -10  -1   94.82    7.13 
  13  10   1  105.24    7.40 
 -12  10  -1  107.70    6.85 
  12 -10   1  110.99    6.58 
 -12 -10  -1   83.31    7.40 
  12  10   1  113.18    7.95 
 -12 -10  -1   97.56    7.13 
  12 -10   1  107.70    7.95 
 -12  10  -1  104.14    8.22 
 -12 -10  -1   95.92    7.40 
  12 -10   1   99.48    7.40 
 -12  10  -1   95.37    7.67 
 -12 -10  -1   95.92    7.13 
  12  10   1   95.10    8.22 
 -11  10  -1   67.42    6.30 
  11 -10   1   60.57    5.76 
 -11 -10  -1   59.74    7.67 
  11  10   1   63.58    6.03 
 -11 -10  -1   60.57    8.22 
  11 -10   1   60.84    6.30 
 -11 -10  -1   64.95    7.67 
 -11  10  -1   60.84    6.30 
  11 -10   1   54.81    7.95 
 -11  10  -1   58.65    6.58 
 -11 -10  -1   54.81    6.30 
  11  10   1   54.26    6.30 
 -10  10  -1   13.70    4.93 
  10 -10   1   20.01    4.93 
 -10 -10  -1   16.17    5.48 
  10  10   1   18.36    5.21 
 -10 -10  -1   11.78    5.21 
  10 -10   1   13.70    5.21 
 -10 -10  -1   14.52    5.48 
 -10  10  -1   16.44    5.48 
  10 -10   1   17.27    5.76 
 -10  10  -1   12.61    5.48 
 -10 -10  -1   16.72    5.48 
  10  10   1   16.99    5.48 
  -9  10  -1   19.73    4.93 
   9 -10   1   14.52    4.66 
  -9 -10  -1   14.52    4.38 
  -9 -10  -1   17.54    4.66 
  -9 -10  -1   11.51    5.76 
   9  10   1   15.35    4.93 
   9 -10   1   15.62    4.93 
  -9 -10  -1   13.98    5.21 
   9 -10   1   16.99    6.30 
  -9 -10  -1   15.62    5.21 
   9 -10   1   15.62    5.48 
  -9  10  -1   16.44    6.58 
  -9 -10  -1   13.70    7.40 
   9  10   1   15.62    6.58 
   8  10   1    3.29    4.38 
  -8  10  -1    5.48    4.38 
   8 -10   1    1.92    4.38 
  -8 -10  -1    1.10    5.48 
  -8 -10  -1    3.56    4.93 
  -8  10  -1    1.37    4.93 
   8  10   1    3.29    4.38 
   8 -10   1    2.19    4.66 
  -8 -10  -1    0.27    6.85 
   8 -10   1    4.66    5.76 
  -8 -10  -1    3.01    4.93 
   8 -10   1   -0.55    4.93 
  -8  10  -1    1.92    6.30 
  -8 -10  -1    2.19    4.93 
   8  10   1    2.19    4.93 
   7  10   1    0.00    4.11 
  -7  10  -1   -1.37    4.11 
   7 -10   1    0.00    4.11 
  -7 -10  -1    0.00    5.21 
  -7 -10  -1   -2.74    6.03 
  -7  10  -1   -0.55    4.93 
   7  10   1   -1.10    4.11 
  -7  10  -1    0.55    4.11 
   7 -10   1    1.64    4.66 
  -7 -10  -1   -0.82    4.66 
   7 -10   1   -1.92    6.30 
  -7 -10  -1    1.92    4.66 
   7 -10   1    2.19    4.93 
  -7 -10  -1   -1.64    4.66 
  -7  10  -1    0.00    4.93 
   7  10   1    1.92    5.48 
   6  10   1   35.35    5.21 
  -6  10  -1   37.00    5.21 
   6 -10   1   34.80    4.93 
  -6 -10  -1   35.35    4.93 
  -6 -10  -1   35.90    7.13 
  -6  10  -1   39.74    5.76 
   6  10   1   39.46    6.85 
   6 -10   1   41.93    5.76 
  -6 -10  -1   38.37    5.76 
   6 -10   1   31.24    6.85 
  -6 -10  -1   35.63    5.76 
   6 -10   1   31.52    6.85 
  -6 -10  -1   38.92    6.03 
  -6  10  -1   40.29    5.76 
   6  10   1   35.08    5.48 
   5  10   1   11.78    4.38 
  -5  10  -1   10.69    5.21 
   5 -10   1   14.52    4.38 
  -5 -10  -1   11.51    4.11 
   5 -10   1   17.54    4.66 
  -5 -10  -1   14.52    6.30 
  -5  10  -1   15.35    4.11 
   5  10   1   15.62    4.38 
   5 -10   1   14.80    4.93 
  -5 -10  -1   13.15    4.66 
   5 -10   1   13.98    6.58 
  -5 -10  -1   13.15    4.93 
   5 -10   1   11.51    5.21 
  -5 -10  -1   12.06    4.93 
  -5  10  -1   10.96    4.93 
   5  10   1   12.06    4.93 
   4  10   1  152.92    9.59 
  -4  10  -1  140.59    9.32 
   4 -10   1  149.91   10.14 
  -4 -10  -1  132.64    8.77 
   4 -10   1  155.39    9.87 
  -4 -10  -1  157.30   10.69 
  -4  10  -1  155.66   10.41 
   4  10   1  146.62    9.32 
   4 -10   1  144.70   10.69 
  -4 -10  -1  139.77    9.59 
   4 -10   1  159.77   10.96 
  -4 -10  -1  139.77    9.59 
   4 -10   1  153.47   11.24 
  -4 -10  -1  144.42    9.87 
  -4  10  -1  145.79    9.87 
   4  10   1  145.79   10.96 
   3  10   1  146.34    9.32 
  -3  10  -1  137.30    9.04 
  -3 -10  -1  143.60    9.87 
   3 -10   1  144.15    9.32 
   3 -10   1  138.67    9.59 
  -3 -10  -1  148.26    9.59 
  -3  10  -1  144.70    9.32 
   3  10   1  139.22    9.59 
   3 -10   1  142.23    9.59 
  -3 -10  -1  123.32    9.87 
   3 -10   1  140.59    9.59 
  -3 -10  -1  133.19    9.32 
   3 -10   1  139.77    9.59 
  -3 -10  -1  131.27    9.32 
  -3  10  -1  141.96   10.69 
   3  10   1  136.20    9.32 
   2  10   1   70.70    7.40 
  -2  10  -1   69.88    6.30 
  -2 -10  -1   69.33    6.03 
   2 -10   1   73.72    7.67 
   2 -10   1   75.91    6.85 
  -2 -10  -1   67.42    6.30 
  -2  10  -1   66.05    6.58 
   2  10   1   69.61    6.03 
   2 -10   1   68.51    6.58 
  -2 -10  -1   70.16    6.58 
   2 -10   1   68.24    6.58 
  -2 -10  -1   61.94    7.95 
   2 -10   1   65.22    7.67 
  -2 -10  -1   73.72    8.50 
  -2  10  -1   67.96    7.13 
   2  10   1   68.51    6.58 
   1  10   1   46.31    4.93 
  -1  10  -1   47.68    4.93 
  -1 -10  -1   50.70    5.76 
   1 -10   1   49.60    4.93 
   1 -10   1   52.07    5.48 
  -1 -10  -1   52.89    5.48 
  -1  10  -1   52.89    5.48 
   1  10   1   51.52    4.93 
   1 -10   1   53.44    5.48 
  -1 -10  -1   48.78    5.48 
   1 -10   1   49.33    5.76 
  -1 -10  -1   49.60    5.76 
   1 -10   1   45.22    5.76 
  -1 -10  -1   48.23    5.48 
  -1  10  -1   50.97    5.76 
   1  10   1   50.15    6.58 
   0  10   1    6.30    3.84 
   0  10  -1    6.58    3.84 
   0 -10  -1    9.04    4.93 
   0 -10   1   10.14    4.11 
   0 -10   1    8.22    5.48 
   0 -10  -1    9.04    6.03 
   0  10  -1    9.04    4.11 
   0  10   1    9.59    3.84 
   0 -10  -1    9.32    5.76 
   0 -10   1    6.58    4.93 
   0 -10  -1    9.04    6.03 
   0 -10   1    8.50    5.21 
   0 -10   1    7.13    4.66 
   0 -10  -1   10.69    4.66 
   0  10  -1    5.76    4.66 
   0  10   1    7.67    4.66 
  -1  10   1   15.35    5.48 
   1  10  -1   22.75    4.38 
   1 -10  -1   22.47    4.38 
  -1 -10   1   22.47    4.38 
   1 -10  -1   26.58    6.03 
  -1 -10   1   21.38    4.93 
   1  10  -1   22.20    5.48 
  -1  10   1   23.29    4.93 
   1 -10  -1   24.39    4.93 
  -1 -10   1   19.73    4.93 
   1 -10  -1   21.65    4.93 
  -1 -10   1   22.47    4.93 
   1 -10  -1   23.84    5.21 
  -1 -10   1   20.01    6.58 
   1  10  -1   23.57    6.03 
  -1  10   1   24.94    4.93 
  -2  10   1   25.49    4.93 
   2  10  -1   25.76    4.38 
   2 -10  -1   26.58    6.03 
  -2 -10   1   24.66    4.38 
   2 -10  -1   25.49    5.48 
  -2 -10   1   27.95    5.48 
   2  10  -1   23.29    4.66 
  -2  10   1   28.78    4.93 
   2 -10  -1   27.68    5.21 
  -2 -10   1   27.68    4.93 
   2 -10  -1   21.92    5.21 
  -2 -10   1   25.76    4.93 
   2 -10  -1   27.95    5.21 
  -2 -10   1   26.86    5.21 
  -2  10   1   22.47    6.03 
   2  10  -1   24.66    4.93 
  -3  10   1    8.22    4.11 
   3  10  -1    9.32    5.48 
   3 -10  -1    9.87    4.11 
  -3 -10   1    9.32    3.84 
   3 -10  -1    9.32    5.76 
  -3 -10   1    7.13    6.03 
   3  10  -1    8.50    4.11 
  -3  10   1    7.13    4.93 
   3 -10  -1    7.67    6.30 
  -3 -10   1    6.03    5.21 
   3 -10  -1   10.14    5.48 
  -3 -10   1   12.33    4.66 
   3 -10  -1    5.76    4.66 
  -3 -10   1    6.85    4.66 
  -3  10   1   10.14    4.66 
   3  10  -1    8.22    6.03 
  -4  10   1    1.64    4.11 
   4  10  -1    2.19    3.84 
   4 -10  -1    5.21    4.11 
  -4 -10   1    2.47    4.66 
   4 -10  -1    0.55    4.66 
  -4 -10   1    4.38    4.66 
   4  10  -1    1.10    5.48 
  -4  10   1    3.56    4.38 
   4 -10  -1    4.66    4.66 
  -4 -10   1    3.29    4.38 
   4 -10  -1    3.84    4.66 
  -4 -10   1    0.27    6.30 
   4 -10  -1    4.11    6.03 
  -4 -10   1    4.93    4.93 
  -4  10   1    7.40    4.66 
   4  10  -1    3.01    4.66 
  -5  10   1   33.98    5.76 
   5  10  -1   38.09    5.76 
   5 -10  -1   38.09    6.03 
  -5 -10   1   36.45    5.76 
   5 -10  -1   43.57    5.76 
  -5 -10   1   41.11    5.76 
   5  10  -1   38.09    5.21 
  -5  10   1   44.67    6.03 
   5 -10  -1   40.56    5.76 
  -5 -10   1   41.11    5.76 
   5 -10  -1   39.74    5.76 
  -5 -10   1   38.92    6.30 
   5 -10  -1   39.19    6.03 
  -5 -10   1   41.38    6.03 
  -5  10   1   36.72    5.76 
   5  10  -1   40.29    5.76 
  -6  10   1   12.06    5.48 
   6  10  -1    9.32    5.76 
   6 -10  -1   10.41    6.03 
  -6 -10   1   10.69    4.93 
  -6 -10   1    7.95    6.03 
   6  10  -1   13.43    4.66 
   6 -10  -1   10.14    4.66 
  -6 -10   1    7.95    6.03 
   6 -10  -1    7.95    4.66 
  -6 -10   1    8.77    4.93 
   6 -10  -1    9.04    4.93 
  -6 -10   1    4.93    4.93 
  -6  10   1   10.96    4.93 
   6  10  -1   11.78    4.93 
  -7  10   1    2.19    4.11 
   7  10  -1    2.47    5.76 
   7 -10  -1    4.11    6.03 
  -7 -10   1    2.47    4.38 
  -7 -10   1    1.92    4.93 
   7  10  -1    3.56    4.93 
  -7 -10   1    1.64    4.66 
   7 -10  -1    0.82    6.30 
  -7 -10   1    1.92    4.93 
  -7  10   1    2.74    4.66 
   7 -10  -1    1.92    5.76 
  -7 -10   1    0.82    4.93 
  -7  10   1    3.56    4.93 
   7  10  -1    1.37    4.93 
  -8  10   1   -1.10    4.11 
   8  10  -1    0.00    4.38 
   8 -10  -1    1.64    6.03 
  -8 -10   1   -0.82    5.21 
  -8 -10   1   -1.10    4.93 
   8  10  -1    0.82    4.66 
  -8 -10   1    1.10    4.66 
   8 -10  -1   -0.27    4.66 
  -8 -10   1    0.55    5.48 
  -8  10   1   -0.27    4.66 
   8 -10  -1   -0.55    5.21 
  -8 -10   1    3.56    4.93 
  -8  10   1   -1.92    4.66 
   8  10  -1    0.55    4.66 
  -9  10   1    1.92    5.48 
   9  10  -1    3.84    4.66 
   9 -10  -1    3.29    5.76 
  -9 -10   1    2.19    4.38 
  -9 -10   1    2.47    5.21 
   9  10  -1   -0.27    4.66 
  -9 -10   1    0.82    6.85 
   9 -10  -1    1.64    4.93 
  -9  10   1    0.82    4.93 
  -9 -10   1    2.47    6.30 
   9 -10  -1   -0.55    5.21 
  -9 -10   1    1.37    5.21 
  -9  10   1    4.66    7.13 
   9  10  -1    2.47    4.93 
 -10  10   1    2.47    4.66 
  10 -10  -1   -0.55    4.38 
 -10 -10   1   -0.27    5.48 
  10  10  -1    2.47    4.66 
 -10 -10   1    0.27    5.48 
  10 -10  -1    0.82    4.93 
 -10  10   1    2.19    4.93 
 -10 -10   1    1.64    5.21 
  10 -10  -1    1.10    7.13 
 -10 -10   1    3.56    5.76 
 -10  10   1    3.56    5.48 
  10  10  -1    1.64    5.21 
 -11  10   1   26.03    5.21 
  11 -10  -1   31.24    5.21 
 -11 -10   1   26.31    6.03 
  11  10  -1   27.41    6.85 
  11  10  -1   31.24    5.76 
 -11 -10   1   21.38    5.76 
  11 -10  -1   29.60    5.76 
 -11  10   1   23.57    5.48 
  11 -10  -1   24.66    6.03 
 -11 -10   1   23.84    5.76 
 -11  10   1   24.66    5.76 
  11  10  -1   20.83    5.48 
 -12  10   1   78.10    6.30 
  12 -10  -1   70.16    6.03 
 -12 -10   1   80.57    7.13 
  12  10  -1   73.72    6.30 
  12  10  -1   79.20    7.67 
 -12 -10   1   66.32    6.58 
  12 -10  -1   72.62    8.50 
 -12  10   1   72.62    7.95 
  12 -10  -1   70.98    6.85 
 -12 -10   1   64.13    6.58 
 -12  10   1   66.59    6.85 
  12  10  -1   67.42    6.58 
 -13  10   1   15.62    5.21 
  13 -10  -1   19.18    7.13 
 -13 -10   1   17.27    6.30 
  13  10  -1   13.43    5.48 
  13  10  -1   18.36    5.76 
 -13 -10   1   19.46    5.76 
  13 -10  -1   16.44    6.03 
 -13  10   1   14.80    5.76 
  13 -10  -1   20.01    7.40 
 -13 -10   1   16.72    6.03 
 -13  10   1   13.15    6.03 
  13  10  -1   17.27    5.76 
 -14  10   1   44.67    6.03 
  14 -10  -1   47.96    5.76 
 -14 -10   1   25.49    8.22 
  14  10  -1   38.92    6.03 
  14  10  -1   43.03    6.30 
 -14 -10   1   34.26    8.22 
  14 -10  -1   40.83    6.58 
 -14  10   1   37.00    7.40 
  14 -10  -1   43.85    6.85 
 -14  10   1   40.29    6.85 
 -14 -10   1   43.30    7.13 
  14  10  -1   40.83    6.85 
 -11  11  -1    7.13    5.21 
  11 -11   1    7.67    5.21 
 -11 -11  -1    4.11    7.40 
  11  11   1    6.03    6.03 
  11 -11   1    2.47    6.85 
 -11 -11  -1    4.66    7.13 
  11 -11   1    7.40    7.67 
 -11 -11  -1    4.66    7.40 
  11 -11   1    6.03    6.03 
 -11  11  -1    5.21    5.76 
 -11 -11  -1    5.76    5.76 
  11  11   1    3.29    5.48 
 -10  11  -1    2.19    4.93 
  10 -11   1    0.55    4.93 
 -10 -11  -1    3.01    5.76 
  10  11   1    3.01    5.21 
  10 -11   1   -1.37    6.58 
 -10 -11  -1    0.55    5.21 
  10 -11   1    0.00    7.40 
 -10 -11  -1    1.92    5.48 
  10 -11   1    0.00    5.76 
 -10 -11  -1    1.10    5.48 
 -10  11  -1    3.56    5.48 
  10  11   1    0.00    5.48 
  -9  11  -1    0.00    4.93 
   9 -11   1    0.82    4.66 
  -9 -11  -1   -1.37    7.40 
   9  11   1    2.19    5.48 
   9 -11   1    3.01    5.48 
  -9 -11  -1   -0.55    5.21 
   9 -11   1    0.27    6.58 
  -9 -11  -1   -1.92    5.21 
   9 -11   1    0.82    5.76 
  -9 -11  -1    0.00    7.13 
  -9  11  -1    0.82    5.76 
   9  11   1   -1.92    6.58 
   8  11   1   25.76    5.48 
  -8  11  -1   25.49    5.21 
   8 -11   1   19.46    5.21 
  -8 -11  -1   18.91    6.03 
  -8 -11  -1   21.38    5.76 
   8  11   1   22.47    5.48 
   8 -11   1   18.64    5.48 
  -8 -11  -1   24.66    5.76 
   8 -11   1   22.20    5.48 
  -8 -11  -1   21.92    7.95 
   8 -11   1   22.75    6.03 
  -8 -11  -1   15.89    5.76 
  -8  11  -1   21.92    7.13 
   8  11   1   23.02    5.76 
   7  11   1   11.78    5.21 
  -7  11  -1    8.22    6.03 
   7 -11   1   13.15    4.93 
  -7 -11  -1    8.77    5.48 
  -7 -11  -1   10.69    5.48 
   7  11   1    7.13    4.93 
   7 -11   1    8.22    5.48 
  -7 -11  -1    8.22    6.58 
   7 -11   1    7.40    5.21 
  -7 -11  -1    8.50    6.03 
   7 -11   1   13.15    6.03 
  -7 -11  -1    8.77    5.48 
  -7  11  -1    5.76    5.21 
   7  11   1    8.77    5.21 
   6  11   1   41.11    6.30 
  -6  11  -1   40.29    5.48 
   6 -11   1   41.66    5.48 
  -6 -11  -1   37.54    6.58 
  -6 -11  -1   38.64    6.03 
   6  11   1   32.61    6.58 
   6 -11   1   38.92    5.76 
  -6 -11  -1   43.03    5.76 
   6 -11   1   32.89    5.76 
  -6 -11  -1   29.87    5.76 
   6 -11   1   38.92    6.30 
  -6 -11  -1   34.80    6.03 
  -6  11  -1   39.46    6.03 
   6  11   1   37.54    7.40 
   5  11   1    7.13    4.38 
  -5  11  -1    6.58    4.66 
   5 -11   1    7.67    4.66 
  -5 -11  -1    6.30    4.93 
   5 -11   1    2.47    4.93 
  -5 -11  -1    8.22    5.21 
  -5  11  -1    7.95    5.48 
   5  11   1    9.87    4.66 
   5 -11   1    5.48    4.93 
  -5 -11  -1    4.11    4.93 
   5 -11   1    8.50    5.21 
  -5 -11  -1    4.93    5.76 
   5 -11   1    4.93    7.13 
  -5 -11  -1    3.29    5.21 
  -5  11  -1    5.48    4.93 
   5  11   1    4.66    5.21 
   4  11   1   13.43    4.66 
  -4  11  -1   14.80    4.66 
   4 -11   1   13.70    4.93 
  -4 -11  -1   14.80    4.66 
   4 -11   1   14.52    5.21 
  -4 -11  -1   13.98    5.48 
  -4  11  -1   12.61    5.21 
   4  11   1   13.98    4.66 
   4 -11   1   12.33    5.21 
  -4 -11  -1   10.14    4.93 
   4 -11   1   13.98    5.21 
  -4 -11  -1   11.24    6.85 
   4 -11   1   11.78    5.48 
  -4 -11  -1   15.07    5.48 
  -4  11  -1   10.41    4.93 
   4  11   1   11.24    5.21 
   3  11   1   33.71    5.76 
  -3  11  -1   41.66    6.58 
   3 -11   1   34.53    5.48 
  -3 -11  -1   36.17    5.21 
   3 -11   1   33.43    7.40 
  -3 -11  -1   39.19    7.95 
  -3  11  -1   40.01    5.76 
   3  11   1   37.82    5.48 
   3 -11   1   33.43    5.76 
  -3 -11  -1   32.89    7.13 
   3 -11   1   24.94    7.67 
  -3 -11  -1   32.34    6.85 
   3 -11   1   31.52    6.03 
  -3 -11  -1   30.42    5.76 
  -3  11  -1   37.00    6.03 
   3  11   1   35.90    5.76 
   2  11   1   24.94    5.76 
  -2  11  -1   19.73    5.76 
  -2 -11  -1   24.39    4.93 
   2 -11   1   19.46    4.93 
   2 -11   1   18.36    7.40 
  -2 -11  -1   20.83    6.58 
  -2  11  -1   23.02    5.76 
   2  11   1   24.12    5.48 
   2 -11   1   22.47    5.21 
  -2 -11  -1   21.10    5.48 
   2 -11   1   21.38    5.48 
  -2 -11  -1   22.47    5.48 
   2 -11   1   21.10    5.48 
  -2 -11  -1   20.55    5.48 
  -2  11  -1   18.64    5.21 
   2  11   1   16.99    7.13 
   1  11   1    1.37    4.38 
  -1  11  -1    3.29    5.48 
  -1 -11  -1    0.82    4.38 
   1 -11   1    1.10    4.11 
   1 -11   1   -4.38    6.85 
  -1 -11  -1    1.37    6.58 
  -1  11  -1    2.74    5.21 
   1  11   1    0.55    4.66 
  -1 -11  -1    3.56    4.93 
   1 -11   1    2.19    6.03 
   1 -11   1    0.82    4.93 
  -1 -11  -1    0.82    4.93 
   1 -11   1    2.74    5.21 
  -1 -11  -1    0.27    4.93 
  -1  11  -1    0.27    4.93 
   1  11   1   -2.19    4.93 
   0  11   1   77.28    6.85 
   0  11  -1   64.40    7.67 
   0 -11  -1   68.51    6.58 
   0 -11   1   72.62    6.85 
   0 -11   1   74.54    7.40 
   0 -11  -1   78.10    7.67 
   0  11  -1   78.93    7.13 
   0  11   1   76.73    7.13 
   0 -11  -1   58.92    7.13 
   0 -11   1   69.06    7.13 
   0 -11  -1   67.96    8.77 
   0 -11   1   67.69    7.13 
   0 -11   1   68.79    7.13 
   0 -11  -1   57.55    8.22 
   0  11  -1   66.87    8.50 
   0  11   1   71.80    7.40 
  -1  11   1   82.49    8.50 
   1  11  -1   83.59    7.13 
   1 -11  -1   79.47    7.95 
  -1 -11   1   78.93    7.13 
   1 -11  -1   76.19    7.40 
  -1 -11   1   85.23    7.95 
   1  11  -1   79.20    8.22 
  -1  11   1   86.60    7.95 
   1 -11  -1   81.39    9.04 
  -1 -11   1   70.43    7.13 
   1 -11  -1   75.64    7.67 
  -1 -11   1   79.20    7.40 
  -1 -11   1   77.56    8.50 
   1 -11  -1   73.17    7.40 
  -1  11   1   77.56    7.40 
   1  11  -1   83.31    7.67 
  -2  11   1   -1.10    4.93 
   2  11  -1    0.00    4.11 
   2 -11  -1    0.27    4.38 
  -2 -11   1    0.55    4.11 
   2 -11  -1    0.27    6.58 
  -2 -11   1   -4.38    4.93 
   2  11  -1   -1.10    4.38 
  -2  11   1    1.64    4.38 
   2 -11  -1   -0.27    4.93 
  -2 -11   1   -0.27    4.66 
   2 -11  -1    0.55    6.85 
  -2 -11   1   -0.82    4.66 
   2 -11  -1    0.55    4.93 
  -2 -11   1   -3.01    6.30 
  -2  11   1    1.64    4.66 
   2  11  -1    2.19    4.93 
  -3  11   1   51.25    5.76 
   3  11  -1   55.36    6.58 
   3 -11  -1   49.60    6.30 
  -3 -11   1   53.44    6.03 
   3 -11  -1   55.08    7.40 
  -3 -11   1   53.71    7.40 
   3  11  -1   52.89    7.13 
  -3  11   1   58.92    6.58 
   3 -11  -1   57.28    6.58 
  -3 -11   1   52.89    6.30 
   3 -11  -1   57.00    6.85 
  -3 -11   1   46.59    7.95 
   3 -11  -1   60.84    7.95 
  -3 -11   1   59.47    6.85 
  -3  11   1   58.65    6.85 
   3  11  -1   50.15    6.58 
  -4  11   1  101.67    7.95 
   4  11  -1  105.78    8.22 
   4 -11  -1  107.70    8.50 
  -4 -11   1  102.22    9.04 
  -4 -11   1  107.15    9.04 
   4  11  -1  104.41    8.22 
   4 -11  -1   98.66    8.50 
  -4 -11   1   92.08    9.04 
   4 -11  -1   98.93    9.32 
  -4 -11   1   94.55    8.22 
   4 -11  -1  102.22    8.77 
  -4 -11   1   94.55    8.22 
  -4  11   1   97.84    8.50 
   4  11  -1   87.97    8.77 
  -5  11   1   16.99    4.93 
   5  11  -1   20.55    6.30 
   5 -11  -1   20.28    4.93 
  -5 -11   1   17.54    4.93 
  -5 -11   1   18.36    6.85 
   5  11  -1   21.65    5.48 
   5 -11  -1   20.01    5.48 
  -5 -11   1   13.98    5.21 
   5 -11  -1   23.29    5.48 
  -5 -11   1   19.46    5.48 
   5 -11  -1   19.73    7.67 
  -5 -11   1   18.36    5.48 
  -5  11   1   19.18    5.48 
   5  11  -1   18.36    5.21 
  -6  11   1   -2.19    5.76 
   6  11  -1    3.01    4.93 
   6 -11  -1    0.82    4.38 
  -6 -11   1    1.37    4.66 
  -6 -11   1   -0.82    6.85 
   6  11  -1    1.92    4.66 
   6 -11  -1    2.19    4.93 
  -6 -11   1    0.82    4.93 
   6 -11  -1    1.37    4.93 
  -6 -11   1    0.00    5.21 
   6 -11  -1    0.82    5.21 
  -6 -11   1   -1.10    5.21 
  -6  11   1    1.37    4.93 
   6  11  -1    0.27    4.93 
  -7  11   1    4.66    4.66 
   7  11  -1    0.55    6.58 
   7 -11  -1    2.47    4.66 
  -7 -11   1    3.01    4.66 
  -7 -11   1    7.95    7.67 
   7  11  -1    0.55    4.93 
   7 -11  -1    1.64    4.93 
  -7 -11   1    4.66    5.21 
   7 -11  -1    5.21    7.13 
  -7 -11   1    5.48    5.21 
   7 -11  -1    3.29    6.85 
  -7 -11   1    1.10    6.85 
  -7  11   1    3.56    5.21 
   7  11  -1    1.92    5.48 
  -8  11   1   -0.82    4.66 
   8  11  -1    2.47    5.21 
   8 -11  -1    0.00    4.66 
  -8 -11   1    1.37    5.48 
  -8 -11   1    0.55    5.48 
   8  11  -1    1.64    6.58 
   8 -11  -1    0.55    5.21 
  -8 -11   1    0.27    5.21 
   8 -11  -1    0.00    4.93 
  -8 -11   1   -1.92    5.48 
   8 -11  -1   -0.55    5.48 
  -8 -11   1   -0.82    5.21 
  -8  11   1    2.74    5.21 
   8  11  -1    0.00    5.21 
  -9  11   1   24.66    5.21 
   9 -11  -1   20.83    5.21 
  -9 -11   1   19.18    5.76 
   9  11  -1   21.65    5.48 
  -9 -11   1   19.46    7.13 
   9 -11  -1   19.46    5.76 
  -9 -11   1   13.98    6.85 
  -9  11   1   21.38    5.76 
   9 -11  -1   19.18    6.03 
  -9 -11   1   10.69    5.76 
  -9  11   1   14.80    5.76 
   9  11  -1   18.91    7.67 
 -10  11   1   15.07    7.13 
  10 -11  -1   16.44    5.21 
 -10 -11   1   12.88    7.67 
  10  11  -1   13.70    5.21 
 -10 -11   1    6.03    5.76 
  10 -11  -1   13.70    5.76 
 -10 -11   1   11.24    5.76 
 -10  11   1   11.51    6.85 
  10 -11  -1   12.88    7.95 
 -10 -11   1   11.78    5.76 
 -10  11   1    9.04    6.30 
  10  11  -1    9.59    5.76 
 -11  11   1   24.66    5.48 
  11 -11  -1   20.28    5.48 
 -11 -11   1   23.02    6.30 
  11  11  -1   24.39    6.85 
 -11 -11   1   19.73    5.76 
  11 -11  -1   23.57    7.67 
 -11  11   1   17.81    6.03 
 -11 -11   1   20.55    6.03 
  11 -11  -1   21.38    6.30 
 -11 -11   1   22.75    6.03 
 -11  11   1   21.38    6.03 
  11  11  -1   16.44    5.76 
  -8  12  -1    4.66    5.21 
   8 -12   1    5.48    5.21 
  -8 -12  -1    1.10    6.58 
   8  12   1    5.76    6.58 
   8 -12   1    6.30    6.03 
  -8 -12  -1    4.93    5.76 
   8 -12   1    1.37    5.76 
  -8 -12  -1    3.56    5.76 
   8 -12   1    0.00    6.03 
  -8 -12  -1    4.38    6.03 
  -8  12  -1    3.56    5.76 
   8  12   1    6.03    5.76 
  -7  12  -1    1.64    4.93 
   7 -12   1   -4.38    4.93 
  -7 -12  -1    0.27    5.48 
  -7 -12  -1   -1.92    6.03 
   7  12   1    0.00    5.48 
   7 -12   1   -1.10    5.76 
  -7 -12  -1    0.00    5.48 
   7 -12   1    0.82    5.48 
  -7 -12  -1   -1.92    5.48 
   7 -12   1   -2.19    6.03 
  -7 -12  -1   -3.56    5.76 
  -7  12  -1   -2.19    5.48 
   7  12   1   -2.47    5.48 
   6  12   1   37.27    7.67 
  -6  12  -1   34.26    6.85 
   6 -12   1   37.00    5.76 
  -6 -12  -1   36.17    5.76 
  -6 -12  -1   39.46    6.85 
   6  12   1   47.14    6.30 
   6 -12   1   33.16    6.30 
  -6 -12  -1   38.92    6.30 
   6 -12   1   33.43    7.67 
  -6 -12  -1   33.71    6.03 
   6 -12   1   33.43    6.58 
  -6 -12  -1   37.82    7.67 
  -6  12  -1   32.06    6.03 
   6  12   1   31.52    6.03 
   5  12   1   68.24    7.40 
  -5  12  -1   61.94    6.03 
   5 -12   1   64.40    7.40 
  -5 -12  -1   66.32    6.30 
  -5 -12  -1   77.83    7.40 
   5  12   1   71.53    7.95 
   5 -12   1   67.96    6.58 
  -5 -12  -1   62.21    6.58 
   5 -12   1   64.95    6.58 
  -5 -12  -1   66.59    6.85 
   5 -12   1   67.69    7.13 
  -5 -12  -1   63.03    8.22 
  -5  12  -1   66.05    6.58 
   5  12   1   69.88    6.85 
   4  12   1    0.00    5.48 
  -4  12  -1    0.82    4.93 
   4 -12   1    3.56    4.93 
  -4 -12  -1    0.82    5.21 
  -4 -12  -1   -3.84    7.67 
   4  12   1   -0.55    6.30 
   4 -12   1    3.01    6.03 
  -4 -12  -1   -0.82    6.85 
   4 -12   1    0.00    5.21 
  -4 -12  -1    1.64    5.48 
   4 -12   1    3.01    5.76 
  -4 -12  -1    0.55    6.03 
  -4  12  -1    1.92    6.03 
   4  12   1   -2.47    6.03 
   3  12   1    2.74    6.30 
  -3  12  -1    4.11    4.93 
  -3 -12  -1   -0.27    6.58 
   3 -12   1    1.10    4.66 
   3 -12   1   -1.37    6.30 
  -3 -12  -1    3.01    6.03 
   3  12   1    0.55    6.30 
   3 -12   1    2.19    6.03 
  -3 -12  -1    4.11    6.85 
   3 -12   1    3.01    7.13 
  -3 -12  -1    4.38    5.48 
   3 -12   1    2.47    7.40 
  -3 -12  -1   -1.92    5.76 
  -3  12  -1    0.00    6.85 
   3  12   1    2.47    6.58 
   2  12   1  111.81    6.85 
  -2  12  -1  106.61    6.85 
  -2 -12  -1  104.41    8.22 
   2 -12   1  101.95    6.58 
   2 -12   1  109.35    8.22 
  -2 -12  -1  114.55    8.22 
  -2  12  -1  112.63    7.13 
   2  12   1  112.63    8.22 
   2 -12   1  106.06    7.67 
  -2 -12  -1   94.27    7.13 
   2 -12   1   92.35    7.40 
  -2 -12  -1  102.49    7.40 
   2 -12   1  100.03    7.40 
  -2 -12  -1   96.47    8.50 
  -2  12  -1  103.87    8.50 
   2  12   1   99.75    7.13 
   1  12   1  123.32    7.40 
  -1  12  -1  136.20    7.13 
  -1 -12  -1  123.05    8.22 
   1 -12   1  136.20    8.77 
   1 -12   1  128.53    9.87 
  -1 -12  -1  141.41    8.22 
  -1  12  -1  147.44    7.67 
   1  12   1  144.42    9.04 
  -1 -12  -1  126.34    7.67 
   1 -12   1  125.79    7.67 
   1 -12   1  103.87    8.22 
  -1 -12  -1  115.10    7.95 
   1 -12   1  119.21    7.67 
  -1 -12  -1  140.31    9.87 
  -1  12  -1  109.62    7.67 
   1  12   1  126.89    7.67 
   0  12   1    9.04    4.93 
   0  12  -1   11.78    4.93 
   0 -12  -1   10.69    4.93 
   0 -12   1   12.33    4.93 
   0 -12   1    7.67    6.03 
   0 -12  -1    7.67    7.40 
   0  12  -1   10.14    5.48 
   0  12   1   12.61    5.48 
   0 -12  -1   12.06    5.48 
   0 -12   1   11.24    5.48 
   0 -12  -1   11.78    6.85 
   0 -12   1   10.96    5.48 
   0 -12   1    4.66    5.48 
   0 -12  -1   16.17    5.76 
   0  12  -1   11.51    5.48 
   0  12   1   11.78    5.48 
  -1  12   1    8.77    4.93 
   1  12  -1    8.50    5.48 
   1 -12  -1    7.67    4.93 
  -1 -12   1    9.32    4.66 
  -1 -12   1   10.41    5.76 
   1  12  -1   10.14    6.58 
   1 -12  -1   10.14    5.48 
  -1 -12   1   10.14    5.48 
   1 -12  -1    7.67    5.76 
  -1 -12   1   11.78    6.85 
   1 -12  -1    9.87    5.48 
  -1 -12   1    5.76    5.48 
   1  12  -1   11.78    5.48 
  -1  12   1    9.87    5.48 
  -2  12   1   15.35    6.30 
   2  12  -1   19.18    6.30 
   2 -12  -1   18.91    5.48 
  -2 -12   1   18.64    5.21 
  -2 -12   1   20.83    6.03 
   2  12  -1   18.09    5.48 
   2 -12  -1   20.55    5.76 
  -2 -12   1   15.89    5.48 
   2 -12  -1   21.10    6.30 
  -2 -12   1   20.28    6.30 
   2 -12  -1   23.57    6.03 
  -2 -12   1   21.38    7.13 
  -2  12   1   24.12    5.76 
   2  12  -1   20.83    5.76 
  -3  12   1    6.85    5.76 
   3  12  -1    8.50    5.21 
   3 -12  -1    8.77    4.93 
  -3 -12   1    8.77    4.93 
  -3 -12   1    2.47    6.03 
   3  12  -1    8.50    5.48 
   3 -12  -1    9.32    5.48 
  -3 -12   1    7.67    5.21 
   3 -12  -1    4.66    5.48 
  -3 -12   1    7.95    5.48 
   3 -12  -1   10.14    7.95 
  -3 -12   1    8.22    7.13 
  -3  12   1    6.58    5.48 
   3  12  -1    9.87    5.48 
  -4  12   1    0.27    5.21 
   4  12  -1    0.00    6.03 
   4 -12  -1   -1.10    4.93 
  -4 -12   1    0.00    6.30 
  -4 -12   1    0.55    6.03 
   4  12  -1    0.82    5.48 
   4 -12  -1   -1.37    5.48 
  -4 -12   1   -1.10    5.48 
   4 -12  -1    3.84    5.48 
  -4 -12   1    0.00    5.21 
   4 -12  -1   -1.37    5.48 
  -4 -12   1   -3.29    6.85 
  -4  12   1    0.27    5.21 
   4  12  -1   -2.74    6.58 
  -5  12   1    2.74    5.21 
   5  12  -1   -0.82    5.48 
   5 -12  -1   -1.64    5.21 
  -5 -12   1    0.00    4.93 
  -5 -12   1    1.92    8.50 
   5  12  -1   -0.55    5.21 
   5 -12  -1    0.82    5.48 
  -5 -12   1    1.10    5.21 
   5 -12  -1    0.82    5.48 
  -5 -12   1    0.00    5.48 
   5 -12  -1    6.85    5.76 
  -5 -12   1    2.74    5.76 
  -5  12   1   -2.19    5.48 
   5  12  -1    0.27    5.76 
  -6  12   1    7.95    6.30 
   6  12  -1   17.54    5.76 
   6 -12  -1   15.07    7.13 
  -6 -12   1   13.70    5.48 
  -6 -12   1   11.24    7.13 
   6  12  -1   13.98    6.30 
   6 -12  -1   13.70    5.76 
  -6 -12   1   14.25    7.95 
   6 -12  -1   12.06    6.30 
  -6 -12   1   14.25    5.76 
   6 -12  -1   13.43    7.40 
  -6 -12   1   13.70    5.76 
  -6  12   1   14.25    5.76 
   6  12  -1   16.44    5.76 
   7  12  -1    6.85    6.85 
  -7  12   1    4.66    6.03 
   7 -12  -1    2.74    4.93 
  -7 -12   1    1.37    5.21 
  -7 -12   1    6.30    7.95 
   7  12  -1    7.67    5.48 
   7 -12  -1    4.93    5.76 
  -7 -12   1    2.47    7.13 
   7 -12  -1    3.01    5.48 
  -7 -12   1    5.76    5.76 
   7 -12  -1    3.01    6.03 
  -7 -12   1    4.66    5.76 
  -7  12   1   10.41    7.40 
   7  12  -1    5.48    5.48 
  -8  12   1   10.14    5.21 
   8 -12  -1   10.14    5.21 
  -8 -12   1   10.14    7.95 
   8  12  -1   10.69    5.48 
   8 -12  -1   12.61    6.03 
  -8 -12   1   12.33    6.30 
   8 -12  -1   11.51    7.40 
  -8 -12   1   10.69    5.76 
   8 -12  -1    7.95    7.67 
  -8 -12   1   11.24    6.03 
  -8  12   1   12.06    6.03 
   8  12  -1   10.69    7.95 
 -22   0  -2    4.11    5.48 
  22   0   2    6.30    5.21 
  22   0   2    4.66    6.30 
 -22   0  -2    0.00    8.22 
 -22   0  -2    0.82    6.03 
 -22   0  -2    2.74    5.76 
 -21   0  -2  136.48    7.67 
  21   0   2  143.05    7.40 
  21   0   2  137.85    8.50 
 -21   0  -2  143.05    9.32 
 -21   0  -2  141.41    8.22 
 -21   0  -2  151.55    8.22 
  20   0   2    1.37    5.48 
  20   0   2    1.10    4.66 
 -20   0  -2   -3.84    4.93 
  20   0   2    0.55    5.48 
  20   0   2    0.82    4.93 
 -20   0  -2    2.47    4.93 
 -20   0  -2   -0.82    5.21 
 -20   0  -2    2.19    5.21 
 -19   0  -2    0.00    5.21 
  19   0   2    0.27    4.93 
 -19   0  -2    0.00    4.93 
  19   0   2    0.00    4.38 
  19   0   2    0.82    4.66 
 -19   0  -2   -2.19    4.66 
 -19   0  -2   -1.10    6.30 
 -19   0  -2    0.00    5.21 
 -18   0  -2   13.43    4.66 
  18   0   2   16.99    4.66 
 -18   0  -2   15.35    4.93 
  18   0   2   14.25    6.03 
  18   0   2   16.44    5.76 
 -18   0  -2   11.51    4.66 
 -18   0  -2   10.41    4.93 
 -18   0  -2   13.15    6.85 
 -17   0  -2    0.27    4.38 
  17   0   2    0.55    4.11 
 -17   0  -2   -0.27    4.11 
  17   0   2    1.10    4.11 
  17   0   2    0.82    4.11 
 -17   0  -2    1.92    4.11 
 -17   0  -2    1.10    4.38 
 -17   0  -2    0.27    4.38 
  16   0   2  749.25   27.41 
  16   0   2  748.16   27.68 
  16   0   2  751.45   27.95 
 -16   0  -2  742.95   27.68 
 -16   0  -2  699.10   26.86 
 -16   0  -2  710.89   26.86 
 -15   0  -2 1619.36   59.74 
  15   0   2 1708.43   20.83 
 -15   0  -2 1727.89   21.92 
 -15   0  -2 1719.12   21.65 
 -15   0  -2 1702.67   21.92 
 -14   0  -2  433.00   15.35 
  14   0   2  481.78   16.17 
 -14   0  -2  442.32   15.62 
  14   0   2  465.89   16.17 
  14   0   2  470.82   16.72 
 -14   0  -2  474.38   16.99 
 -14   0  -2  449.99   16.17 
 -14   0  -2  417.65   15.62 
 -13   0  -2  165.80    7.40 
  13   0   2  151.55    7.13 
 -13   0  -2  175.39    7.95 
  13   0   2  148.26    7.67 
  13   0   2  173.20    7.95 
 -13   0  -2  176.76    8.77 
 -13   0  -2  171.01    9.04 
 -13   0  -2  159.50    8.50 
 -12   0  -2   25.49    3.01 
  12   0   2   27.41    3.01 
 -12   0  -2   23.84    3.84 
  12   0   2   27.13    4.66 
  12   0   2   30.69    4.66 
 -12   0  -2   24.12    4.66 
 -12   0  -2   26.86    4.11 
 -12   0  -2   28.78    4.11 
 -11   0  -2   22.75    3.56 
  11   0   2   23.02    2.74 
 -11   0  -2   24.94    4.66 
  11   0   2   24.39    3.56 
  11   0   2   20.55    3.56 
 -11   0  -2   27.13    4.66 
  11   0   2   24.39    3.84 
 -11   0  -2   21.10    3.84 
 -10   0  -2   41.38    3.56 
  10   0   2   43.30    3.29 
 -10   0  -2   41.66    3.84 
  10   0   2   39.74    3.84 
  10   0   2   42.75    3.84 
 -10   0  -2   42.20    4.66 
  10   0   2   41.11    4.38 
 -10   0  -2   40.29    4.93 
  -9   0  -2  417.10   11.24 
   9   0   2  416.01   10.96 
  -9   0  -2  442.04   11.51 
   9   0   2  428.07   11.78 
   9   0   2  449.99   11.78 
  -9   0  -2  437.93   11.78 
   9   0   2  434.64   12.06 
  -9   0  -2  435.19   11.78 
  -8   0  -2  258.16    8.50 
   8   0   2  285.29    8.50 
  -8   0  -2  286.93    9.04 
   8   0   2  243.08    7.95 
   8   0   2  284.46    9.04 
  -8   0  -2  293.51    9.32 
   8   0   2  280.35    9.04 
  -8   0  -2  275.69    9.59 
  -7   0  -2    2.47    2.19 
   7   0   2    2.47    1.92 
  -7   0  -2    2.74    2.47 
   7   0   2    3.56    2.47 
   7   0   2    3.29    2.74 
  -7   0  -2    2.47    2.74 
   7   0   2    3.84    2.47 
  -7   0  -2    3.01    2.47 
   6   0   2 1317.91   19.18 
   6   0   2 1336.27   19.73 
  -6   0  -2 1277.07   21.10 
   6   0   2 1334.35   20.28 
   5   0   2 2314.63   27.95 
  -5   0  -2 2268.86   28.23 
   5   0   2 2223.64   32.89 
  -5   0  -2 2245.84   29.87 
   5   0   2 2287.50   29.60 
  -5   0  -2 2324.49   29.05 
   4   0   2 9999.00   52.62 
   3   0   2 4927.97   49.60 
  -3   0  -2 4904.95   49.33 
   2   0   2 5197.64   50.70 
   2   0   2 5173.25   52.89 
  -2   0  -2 5208.60   52.89 
   1   0   2 1323.66   19.18 
  -1   0  -2 1287.21   20.01 
  -1   0  -2 1310.23   21.10 
   1   0   2 1258.71   19.46 
  -1   0  -2 1312.98   19.73 
   0   0   2  859.70   15.07 
   0   0   2  869.29   15.89 
   0   0  -2  860.52   15.62 
   0   0  -2  883.54   16.99 
   0   0   2  915.88   16.44 
   0   0   2  859.97   16.44 
   3   0  -2   66.87    4.11 
  -3   0   2   70.16    4.38 
  -3   0   2   67.69    4.66 
   3   0  -2   64.68    4.38 
   3   0  -2   67.14    4.66 
  -3   0   2   77.28    4.93 
  -3   0   2   69.33    4.11 
   4   0  -2 2166.37   26.86 
  -4   0   2 2180.89   27.68 
  -4   0   2 2132.11   28.23 
   5   0  -2  671.15   13.15 
   5   0  -2  643.74   12.61 
  -5   0   2  650.05   13.15 
   5   0  -2  684.03   13.43 
   5   0  -2  656.62   13.43 
  -5   0   2  679.10   13.70 
  -5   0   2  650.87   13.15 
  -5   0   2  705.41   14.25 
   6   0  -2  211.57    6.85 
   6   0  -2  205.26    6.58 
  -6   0   2  203.62    7.13 
   6   0  -2  218.14    7.40 
   6   0  -2  215.68    7.40 
  -6   0   2  205.26    7.40 
  -6   0   2  210.20    7.13 
  -6   0   2  204.17    7.13 
   7   0  -2  348.87   13.15 
   7   0  -2  372.71   13.70 
  -7   0   2  315.71   12.88 
   7   0  -2  394.63   14.52 
   7   0  -2  380.11   14.25 
  -7   0   2  366.13   13.98 
  -7   0   2  375.17   13.98 
  -7   0   2  354.35   13.43 
   8   0  -2   16.99    2.47 
   8   0  -2   16.44    3.01 
  -8   0   2   14.25    3.56 
   8   0  -2   16.44    3.56 
   8   0  -2   14.52    3.29 
  -8   0   2   15.89    3.01 
  -8   0   2   15.07    3.01 
  -8   0   2   16.44    3.29 
   9   0  -2  268.57    8.77 
   9   0  -2  253.77    8.22 
  -9   0   2  216.77    8.77 
   9   0  -2  243.08    7.67 
   9   0  -2  256.51    8.77 
  -9   0   2  242.26    7.95 
  -9   0   2  253.50    9.04 
  -9   0   2  244.18    7.95 
  10   0  -2  139.49    6.85 
  10   0  -2  145.79    7.13 
 -10   0   2  136.75    7.40 
  10   0  -2  142.78    6.85 
  10   0  -2  140.31    7.13 
 -10   0   2  139.77    7.67 
 -10   0   2  131.54    6.85 
 -10   0   2  131.27    6.58 
  11   0  -2    2.47    2.74 
  11   0  -2    3.84    2.19 
 -11   0   2    2.19    3.56 
  11   0  -2    5.48    3.84 
  11   0  -2    4.93    3.01 
 -11   0   2    4.38    3.01 
 -11   0   2    4.11    2.74 
 -11   0   2    3.01    4.11 
  12   0  -2   95.92    5.48 
  12   0  -2   88.52    4.93 
 -12   0   2   82.49    5.76 
  12   0  -2  100.03    5.48 
  12   0  -2   89.89    5.48 
 -12   0   2   94.27    5.48 
 -12   0   2   88.79    5.48 
 -12   0   2   89.89    5.48 
  13   0  -2   98.66    6.30 
  13   0  -2   92.63    6.03 
 -13   0   2   83.04    6.03 
  13   0  -2   94.00    5.76 
  13   0  -2   87.42    5.48 
 -13   0   2   85.23    5.48 
 -13   0   2   84.96    6.03 
 -13   0   2   87.15    5.48 
  14   0  -2   95.10    5.76 
  14   0  -2   95.10    5.21 
 -14   0   2   78.93    6.30 
  14   0  -2   92.90    6.30 
  14   0  -2   94.00    5.76 
 -14   0   2   85.78    5.76 
 -14   0   2   88.24    6.58 
 -14   0   2   80.30    5.76 
  15   0  -2   23.57    3.84 
  15   0  -2   25.21    3.56 
 -15   0   2   23.02    4.38 
  15   0  -2   23.29    4.93 
  15   0  -2   26.86    5.76 
 -15   0   2   20.01    4.38 
 -15   0   2   20.28    4.11 
 -15   0   2   20.83    4.11 
  16   0  -2   83.59    6.03 
  16   0  -2   78.93    6.30 
 -16   0   2   71.80    6.03 
  16   0  -2   77.01    6.03 
  16   0  -2   71.80    6.85 
 -16   0   2   70.16    7.40 
 -16   0   2   73.17    6.03 
 -16   0   2   72.08    6.58 
  17   0  -2   18.36    4.93 
  17   0  -2   14.52    4.93 
 -17   0   2   19.73    4.93 
  17   0  -2   17.27    4.38 
  17   0  -2   17.81    4.66 
 -17   0   2   12.06    4.38 
 -17   0   2   18.64    4.66 
 -17   0   2   15.35    4.66 
  18   0  -2   30.15    5.48 
  18   0  -2   28.78    5.21 
 -18   0   2   26.31    5.21 
  18   0  -2   40.29    5.21 
  18   0  -2   28.78    5.21 
 -18   0   2   27.68    6.03 
 -18   0   2   31.24    5.76 
 -18   0   2   30.42    4.93 
  19   0  -2    4.11    4.66 
  19   0  -2    5.21    5.48 
 -19   0   2    3.84    6.85 
  19   0  -2    2.74    4.38 
  19   0  -2    2.47    4.66 
 -19   0   2    3.01    4.93 
 -19   0   2    3.84    6.58 
 -19   0   2    2.74    4.66 
  20   0  -2   27.13    5.21 
  20   0  -2   26.58    6.58 
 -20   0   2   21.10    5.76 
  20   0  -2   25.49    5.21 
  20   0  -2   21.65    5.48 
 -20   0   2   21.10    5.48 
 -20   0   2   27.13    6.85 
 -20   0   2   21.38    6.85 
  21   0  -2    0.00    6.03 
  21   0  -2    0.00    4.93 
 -21   0   2    1.64    5.48 
  21   0  -2   -2.74    4.93 
  21   0  -2   -0.27    6.58 
 -21   0   2   -0.55    6.85 
 -21   0   2    0.82    5.76 
 -21   0   2   -0.82    7.13 
 -22   0   2    0.00    6.85 
  22   0  -2    2.19    5.48 
  22   0  -2    0.00    5.21 
 -22   0   2   -1.64    5.48 
 -22   0   2   -2.74    6.03 
 -22   0   2   -0.27    6.03 
 -22  -1  -2   -1.92    5.48 
 -22   1  -2   -3.29    6.85 
  22   1   2    0.00    5.21 
  22  -1   2    4.11    5.21 
  22   1   2    4.38    6.03 
  22  -1   2    1.10    5.76 
 -22  -1  -2   -0.27    7.67 
 -22   1  -2    2.74    6.30 
 -22  -1  -2    4.11    6.03 
 -22   1  -2   -2.47    7.40 
 -22  -1  -2    0.00    6.03 
 -22   1  -2    3.29    6.30 
 -21   1  -2   70.70    7.67 
  21  -1   2   90.16    6.58 
 -21  -1  -2   71.25    6.58 
 -21   1  -2   71.25    8.50 
  21   1   2   79.20    7.67 
  21  -1   2   72.35    6.30 
  21   1   2   80.84    7.95 
  21  -1   2   78.65    6.85 
 -21  -1  -2   54.54    7.95 
 -21   1  -2   72.90    7.13 
 -21  -1  -2   75.91    8.22 
 -21   1  -2   71.80    6.85 
 -21  -1  -2   51.52    7.67 
 -21   1  -2   78.38    7.95 
 -20   1  -2   75.09    7.40 
  20  -1   2   79.75    6.03 
 -20  -1  -2   70.70    6.30 
 -20   1  -2   55.36    7.67 
  20   1   2   77.28    6.30 
  20  -1   2   77.56    6.30 
  20   1   2   79.20    6.85 
  20  -1   2   73.17    6.85 
 -20  -1  -2   72.35    8.22 
 -20   1  -2   72.62    6.85 
 -20  -1  -2   70.16    7.95 
 -20   1  -2   72.62    6.85 
 -20  -1  -2   66.05    6.58 
 -20   1  -2   65.77    7.40 
 -19   1  -2   11.78    5.21 
  19  -1   2   10.96    4.38 
  19   1   2   13.98    4.66 
 -19  -1  -2    8.77    4.93 
 -19   1  -2    9.87    6.58 
  19   1   2   10.41    4.93 
  19  -1   2   12.33    4.66 
  19   1   2    7.40    6.85 
  19  -1   2   11.24    6.58 
 -19  -1  -2   12.06    6.85 
 -19   1  -2    9.87    6.85 
 -19  -1  -2    7.40    5.48 
 -19   1  -2   12.33    6.58 
 -19  -1  -2   12.33    4.93 
 -19   1  -2    9.87    6.58 
 -18   1  -2    0.00    3.84 
  18  -1   2    1.10    3.56 
  18   1   2    1.37    3.84 
  18   1   2    1.64    3.29 
 -18  -1  -2    1.64    4.93 
 -18   1  -2    1.92    4.93 
  18   1   2    2.74    4.93 
  18  -1   2    3.84    4.11 
  18   1   2    0.82    4.38 
  18  -1   2    1.64    4.11 
 -18  -1  -2    1.37    6.30 
 -18   1  -2    1.37    4.38 
 -18  -1  -2    1.92    4.66 
 -18   1  -2    1.37    4.66 
 -18  -1  -2    1.64    6.03 
 -18   1  -2    0.00    6.58 
 -17   1  -2    9.87    4.38 
  17  -1   2   10.14    3.84 
  17   1   2   10.69    3.84 
 -17  -1  -2   11.24    5.48 
 -17   1  -2    7.95    4.11 
  17   1   2    9.32    4.38 
  17  -1   2   10.41    5.76 
  17   1   2    8.50    4.38 
  17  -1   2    9.59    4.11 
 -17  -1  -2    4.93    5.48 
 -17   1  -2    9.87    4.38 
 -17  -1  -2    9.59    4.66 
 -17   1  -2   12.06    6.03 
 -17  -1  -2    7.40    4.38 
 -17   1  -2    8.22    5.76 
 -16  -1  -2   -0.82    4.11 
 -16   1  -2   -2.74    4.66 
  16  -1   2   -0.27    3.01 
  16   1   2   -0.27    3.29 
 -16  -1  -2    1.37    5.21 
 -16   1  -2   -0.82    3.84 
  16   1   2   -0.82    5.21 
  16  -1   2    0.55    3.56 
  16   1   2    0.00    4.66 
  16  -1   2    1.10    3.84 
 -16  -1  -2    0.00    3.84 
 -16   1  -2    0.00    4.93 
 -16  -1  -2   -0.82    4.38 
 -16   1  -2    0.00    4.11 
 -16  -1  -2    1.37    4.11 
 -16   1  -2    0.00    4.11 
 -15  -1  -2    6.03    3.56 
 -15   1  -2    5.76    3.29 
  15  -1   2    4.66    4.38 
  15   1   2    5.76    3.56 
 -15  -1  -2    4.38    5.21 
 -15   1  -2    6.03    3.84 
  15   1   2    6.58    3.84 
  15  -1   2    4.93    3.56 
  15   1   2    5.76    3.84 
  15  -1   2    6.58    4.66 
 -15  -1  -2    6.30    3.84 
 -15   1  -2    8.22    3.84 
  15  -1   2    7.95    3.84 
 -15  -1  -2    6.58    4.11 
 -15   1  -2    4.93    5.21 
 -15  -1  -2    6.85    4.11 
 -14  -1  -2   34.53    4.11 
 -14   1  -2   31.24    3.84 
  14  -1   2   34.80    3.84 
  14   1   2   35.90    3.84 
 -14  -1  -2   32.06    5.21 
 -14   1  -2   31.52    4.38 
  14   1   2   32.61    4.93 
  14  -1   2   33.16    4.93 
  14   1   2   34.26    4.38 
  14  -1   2   31.52    5.21 
 -14  -1  -2   30.69    4.38 
 -14   1  -2   31.52    5.21 
  14  -1   2   30.69    4.38 
 -14  -1  -2   34.26    4.66 
 -14   1  -2   30.15    4.66 
 -14  -1  -2   33.98    4.93 
 -13  -1  -2   86.33    5.21 
 -13   1  -2   84.13    4.93 
  13  -1   2  100.85    6.03 
  13   1   2   96.74    5.76 
 -13  -1  -2   87.42    5.48 
 -13   1  -2   92.08    6.30 
  13   1   2   98.38    6.03 
  13  -1   2   94.55    6.30 
  13   1   2   99.21    6.03 
  13  -1   2   97.84    6.03 
 -13  -1  -2   97.01    6.58 
 -13   1  -2   96.19    6.03 
  13  -1   2   92.90    6.03 
 -13  -1  -2   97.29    7.40 
 -13   1  -2   93.18    6.85 
 -13  -1  -2  104.41    7.40 
 -12  -1  -2   18.91    3.29 
 -12   1  -2   15.62    3.56 
  12  -1   2   19.73    3.01 
  12   1   2   19.18    3.29 
 -12  -1  -2   17.81    3.56 
 -12   1  -2   16.99    3.29 
  12   1   2   20.01    3.56 
  12  -1   2   20.01    4.66 
  12   1   2   20.83    4.66 
  12  -1   2   17.27    3.29 
 -12  -1  -2   20.28    4.38 
 -12   1  -2   19.18    4.38 
  12  -1   2   16.99    4.38 
 -12  -1  -2   14.80    5.21 
 -12   1  -2   19.18    3.84 
 -12  -1  -2   16.44    3.84 
 -11  -1  -2    0.27    2.47 
 -11   1  -2   -0.82    2.74 
  11  -1   2    0.27    2.74 
  11   1   2    0.00    2.19 
 -11  -1  -2    0.27    3.01 
 -11   1  -2   -0.82    3.56 
  11   1   2   -0.27    3.56 
  11  -1   2    0.27    3.29 
  11   1   2    0.82    2.74 
  11  -1   2    0.00    2.74 
 -11  -1  -2   -0.27    2.74 
 -11   1  -2    0.00    2.47 
  11  -1   2    1.10    4.38 
 -11  -1  -2    0.27    3.84 
 -11   1  -2    0.55    3.01 
 -11  -1  -2    0.00    3.01 
 -10  -1  -2   60.29    4.11 
 -10   1  -2   62.48    4.38 
  10  -1   2   61.94    4.66 
  10   1   2   67.69    4.11 
 -10  -1  -2   63.03    5.48 
 -10   1  -2   66.59    4.66 
  10   1   2   66.05    4.66 
  10  -1   2   64.68    4.38 
  10   1   2   68.24    4.66 
  10  -1   2   66.59    4.93 
 -10  -1  -2   67.96    4.66 
 -10   1  -2   60.29    4.66 
  10  -1   2   57.55    4.93 
 -10  -1  -2   62.21    5.21 
 -10   1  -2   63.03    5.21 
 -10  -1  -2   59.19    4.93 
  -9  -1  -2  298.71    9.04 
  -9   1  -2  298.44    9.04 
   9  -1   2  278.16    8.77 
   9   1   2  294.60    8.77 
  -9  -1  -2  298.44    9.59 
  -9   1  -2  292.14    9.04 
   9   1   2  303.92    9.32 
   9  -1   2  295.43    9.04 
   9   1   2  275.42    9.59 
   9  -1   2  299.26    9.59 
  -9  -1  -2  324.75   10.14 
  -9   1  -2  294.06    9.59 
   9  -1   2  303.37    9.59 
  -9  -1  -2  299.54    9.87 
  -9   1  -2  280.35    9.59 
  -9  -1  -2  293.78    9.32 
  -8   1  -2  225.00    8.77 
  -8  -1  -2  221.71    8.77 
   8  -1   2  245.55    7.95 
   8   1   2  227.19    8.50 
  -8  -1  -2  236.78    7.67 
  -8   1  -2  233.22    9.04 
   8   1   2  245.82    8.22 
   8  -1   2  238.70    7.40 
   8   1   2  243.36    7.95 
  -8  -1  -2  217.87    9.32 
   8  -1   2  237.88    7.95 
  -8   1  -2  231.30    9.32 
  -8  -1  -2  241.71    8.22 
   8  -1   2  233.76    9.32 
  -8   1  -2  226.64    9.32 
  -8  -1  -2  230.75    9.32 
  -7  -1  -2 1164.44   18.91 
   7  -1   2 1200.89   18.09 
   7   1   2 1190.47   17.81 
  -7  -1  -2 1126.89   18.36 
  -7   1  -2 1217.88   19.73 
   7  -1   2 1218.43   18.64 
  -7  -1  -2 1142.79   18.64 
  -7   1  -2 1180.33   19.73 
  -7  -1  -2 1168.82   19.18 
   7  -1   2 1211.30   19.73 
  -7   1  -2 1202.26   19.46 
  -7  -1  -2 1153.20   18.64 
  -6   1  -2  138.12    6.03 
  -6  -1  -2  137.85    5.76 
   6  -1   2  149.91    5.76 
   6   1   2  137.03    5.48 
  -6  -1  -2  142.78    6.30 
   6   1   2  146.89    6.30 
  -6   1  -2  139.77    5.76 
   6  -1   2  146.89    6.30 
   6   1   2  148.26    6.03 
  -6  -1  -2  151.82    6.30 
   6  -1   2  137.57    6.03 
  -6   1  -2  155.93    6.30 
  -6  -1  -2  150.73    6.85 
   6  -1   2  149.36    6.30 
  -6   1  -2  147.17    6.30 
  -6  -1  -2  138.94    6.03 
  -5   1  -2   15.62    3.01 
   5  -1   2   15.62    2.47 
  -5  -1  -2   15.07    2.47 
   5   1   2   13.15    2.19 
  -5  -1  -2   15.07    2.74 
   5   1   2   13.98    2.74 
  -5   1  -2   16.17    3.29 
   5  -1   2   16.17    3.29 
   5   1   2   15.35    3.01 
  -5  -1  -2   15.35    3.01 
   5  -1   2   15.35    2.74 
  -5   1  -2   13.98    2.47 
  -5  -1  -2   15.35    2.74 
   5  -1   2   15.35    3.29 
  -5   1  -2   14.80    3.01 
  -5  -1  -2   14.52    2.74 
  -4   1  -2   40.83    3.84 
   4  -1   2   39.74    3.29 
  -4  -1  -2   32.61    2.74 
   4   1   2   38.92    3.29 
  -4  -1  -2   38.37    3.29 
   4   1   2   37.00    3.29 
  -4   1  -2   39.74    3.84 
   4  -1   2   41.66    3.56 
   4   1   2   39.46    3.56 
  -4  -1  -2   35.35    3.84 
   4  -1   2   38.64    4.11 
  -4   1  -2   42.48    4.38 
  -4  -1  -2   35.90    4.11 
   4  -1   2   37.54    3.84 
  -4   1  -2   40.01    3.56 
  -4  -1  -2   40.83    4.38 
  -3   1  -2   29.32    3.01 
   3  -1   2   28.50    3.01 
  -3  -1  -2   30.42    3.01 
   3   1   2   27.68    2.74 
  -3   1  -2   30.97    3.29 
  -3  -1  -2   30.15    3.56 
   3   1   2   30.15    3.29 
  -3   1  -2   27.68    3.01 
   3   1   2   28.50    3.29 
  -3  -1  -2   28.78    3.01 
   3  -1   2    0.00    1.37 
  -3   1  -2   28.78    3.01 
   3  -1   2   27.68    3.84 
  -3   1  -2   31.24    3.56 
  -3  -1  -2   30.97    4.11 
  -2   1  -2    1.92    1.92 
   2  -1   2    2.19    2.19 
  -2  -1  -2    2.19    1.92 
   2   1   2    2.19    1.92 
   2  -1   2    1.92    1.64 
  -2   1  -2    1.92    2.19 
  -2  -1  -2    3.56    2.47 
   2   1   2    1.92    2.19 
  -2  -1  -2    2.47    1.92 
   2  -1   2    2.47    1.37 
   2  -1   2    0.00    0.82 
  -2  -1  -2    2.74    2.47 
   2  -1   2    1.64    2.74 
  -2   1  -2    4.38    3.01 
  -2  -1  -2    2.74    2.47 
   2   1   2    3.56    2.47 
   1  -1   2 3113.76   34.53 
   1   1   2 3083.61   34.26 
  -1   1  -2 3124.45   37.00 
  -1  -1  -2 3086.90   35.63 
   1   1   2 3074.57   35.63 
   1   1   2 3094.58   38.09 
  -1  -1  -2 3126.91   36.72 
   0  -1   2 1924.93   24.66 
   0  -1   2 1931.23   27.41 
   0   1  -2 1970.42   26.86 
   0   1  -2 1989.61   29.05 
   0  -1  -2 1908.21   26.58 
   0  -1  -2 1908.21   26.03 
   0   1   2 1971.79   25.76 
   1   1  -2   14.80    2.47 
  -1  -1   2   16.44    2.74 
   1  -1  -2   15.62    2.47 
  -1   1   2   15.07    2.47 
  -1   1   2   14.25    3.56 
   1  -1  -2   18.91    3.56 
  -1  -1   2   16.72    3.29 
   1   1  -2   15.89    3.29 
   1   1  -2   16.99    2.74 
  -1  -1   2   17.54    3.01 
   1  -1  -2   17.27    3.01 
  -1   1   2   16.72    2.74 
  -1  -1   2   16.72    3.01 
   1   1  -2   17.54    3.01 
   1  -1  -2   15.89    3.29 
  -1   1   2   16.72    3.29 
   2   1  -2  169.09    6.30 
  -2  -1   2  146.62    5.76 
   2  -1  -2  172.65    6.30 
  -2   1   2  168.81    7.40 
   2  -1  -2  188.55    7.40 
  -2  -1   2  169.36    6.85 
   2   1  -2  169.09    6.85 
   2   1  -2  165.80    6.30 
  -2  -1   2  172.65    6.58 
   2  -1  -2  169.36    6.30 
  -2   1   2  172.65    6.58 
   2  -1  -2  174.84    7.13 
  -2  -1   2  176.21    7.40 
   2   1  -2  187.45    7.40 
  -2   1   2  185.53    6.85 
   3  -1  -2  376.00   13.70 
   3   1  -2  359.28   13.15 
  -3  -1   2  368.05   13.43 
   3  -1  -2  369.69   13.43 
  -3  -1   2  374.08   14.25 
   3  -1  -2  407.79   15.35 
   3   1  -2  385.86   14.25 
   3   1  -2  372.98   13.98 
  -3  -1   2  379.01   14.25 
   3  -1  -2  379.29   14.25 
  -3   1   2  384.22   14.25 
   3  -1  -2  382.03   14.80 
  -3   1   2  422.59   15.62 
  -3  -1   2  379.83   14.25 
   3   1  -2  399.29   14.52 
   4  -1  -2   25.21    3.01 
   4   1  -2   22.20    3.01 
  -4  -1   2   25.21    3.01 
   4  -1  -2   23.29    3.29 
  -4   1   2   23.84    3.01 
  -4  -1   2   22.20    3.29 
   4   1  -2   26.31    3.01 
   4  -1  -2   27.13    3.29 
   4   1  -2   25.49    3.01 
  -4  -1   2   24.94    3.01 
   4  -1  -2   23.84    3.56 
  -4   1   2   25.76    3.29 
   4  -1  -2   22.75    3.84 
  -4   1   2   26.03    4.11 
  -4  -1   2   22.75    2.74 
   4   1  -2   24.94    3.29 
   5  -1  -2  637.44   12.33 
   5   1  -2  600.72   11.24 
  -5  -1   2  608.39   11.78 
   5  -1  -2  625.38   12.33 
  -5   1   2  596.88   20.28 
  -5  -1   2  613.60   12.06 
   5   1  -2  622.37   12.88 
   5  -1  -2  607.84   11.78 
   5   1  -2  640.73   13.15 
  -5  -1   2  631.41   13.15 
   5  -1  -2  595.79   20.28 
   5  -1  -2  595.79   20.28 
  -5   1   2  609.49   12.61 
  -5  -1   2  615.79   12.33 
   5   1  -2  647.31   13.70 
   6  -1  -2  164.16    6.03 
   6   1  -2  146.89    5.76 
  -6  -1   2  147.17    5.76 
  -6   1   2  146.89    6.03 
  -6  -1   2  150.45    6.30 
   6   1  -2  155.93    6.30 
   6  -1  -2  165.25    6.58 
   6   1  -2  152.92    6.30 
  -6  -1   2  158.68    6.30 
   6  -1  -2  161.96    6.58 
  -6   1   2  156.48    6.30 
   6  -1  -2  144.42    6.03 
  -6   1   2  154.29    6.30 
  -6  -1   2  154.02    6.58 
   6   1  -2  156.76    6.58 
   7   1  -2   34.53    3.01 
   7  -1  -2   32.34    3.29 
   7   1  -2   31.24    3.01 
  -7   1   2   30.15    3.56 
  -7  -1   2   30.97    3.56 
   7   1  -2   33.71    3.56 
   7  -1  -2   31.24    3.56 
   7   1  -2   34.80    4.38 
  -7  -1   2   30.42    3.84 
   7  -1  -2   30.42    3.56 
  -7   1   2   33.43    3.56 
  -7  -1   2   31.52    3.56 
   7  -1  -2   30.42    3.56 
  -7   1   2   34.26    3.84 
  -7  -1   2   32.34    3.84 
   8   1  -2  508.64   12.88 
   8  -1  -2  558.79   13.15 
   8   1  -2  564.27   12.88 
  -8  -1   2  529.74   13.15 
  -8   1   2  545.63   13.43 
   8   1  -2  516.58   13.15 
   8  -1  -2  506.99   13.15 
   8   1  -2  562.63   13.43 
  -8  -1   2  556.60   13.98 
   8  -1  -2  533.85   13.15 
  -8   1   2  538.23   13.43 
  -8  -1   2  565.37   13.70 
   8  -1  -2  542.07   13.43 
  -8   1   2  559.88   13.98 
  -8  -1   2  556.87   13.70 
   9   1  -2  210.47    8.50 
   9  -1  -2  211.29    8.77 
   9   1  -2  208.55    8.22 
  -9  -1   2  204.17    9.04 
  -9   1   2  211.02    9.04 
   9   1  -2  219.51    8.77 
   9  -1  -2  221.16    9.04 
   9   1  -2  200.60    8.77 
   9  -1  -2  206.91    9.04 
  -9  -1   2  207.18    8.77 
  -9   1   2  207.18    9.32 
   9  -1  -2  201.43    8.50 
  -9  -1   2  217.60    9.04 
  -9   1   2  216.50    9.32 
  -9  -1   2  193.48    8.50 
  10   1  -2  657.17   13.70 
  10  -1  -2  624.56   13.15 
  10   1  -2  642.65   13.70 
  10  -1  -2  637.72   13.43 
 -10  -1   2  620.18   13.70 
 -10   1   2  605.65   13.43 
  10   1  -2  639.63   13.43 
  10  -1  -2  650.32   13.70 
  10   1  -2  627.30   13.70 
  10  -1  -2  623.19   13.70 
 -10  -1   2  612.50   13.70 
 -10   1   2  587.84   13.98 
  10  -1  -2  619.63   13.43 
 -10  -1   2  622.37   13.70 
 -10   1   2  613.87   13.70 
 -10  -1   2  608.12   13.70 
  11   1  -2  169.36    6.85 
  11  -1  -2  190.19    7.40 
  11   1  -2  178.95    7.13 
  11  -1  -2  178.13    6.85 
 -11  -1   2  169.91    7.13 
 -11   1   2  168.27    6.85 
  11   1  -2  174.57    7.40 
  11  -1  -2  186.08    7.40 
  11   1  -2  168.81    7.40 
  11  -1  -2  175.39    7.13 
 -11  -1   2  158.13    7.40 
 -11   1   2  160.05    7.67 
  11  -1  -2  166.35    6.85 
 -11  -1   2  177.58    7.67 
 -11   1   2  175.67    7.13 
 -11  -1   2  170.46    7.40 
  12   1  -2    5.76    2.47 
  12  -1  -2    5.76    2.74 
  12   1  -2    7.40    3.29 
  12  -1  -2    6.58    2.74 
 -12  -1   2    5.76    3.29 
 -12   1   2    7.95    3.01 
  12   1  -2    4.11    3.01 
  12  -1  -2    5.48    2.74 
  12   1  -2    7.40    3.29 
  12  -1  -2    5.76    3.29 
 -12  -1   2    6.30    3.29 
 -12   1   2    7.13    4.38 
 -12  -1   2    5.76    3.29 
 -12   1   2    5.48    3.01 
 -12  -1   2    4.66    4.11 
  13   1  -2   17.81    3.84 
  13  -1  -2   16.72    4.11 
  13   1  -2   18.09    3.56 
  13  -1  -2   17.27    3.84 
 -13  -1   2   16.99    3.84 
 -13   1   2   16.17    3.56 
  13   1  -2   18.91    3.56 
  13  -1  -2   18.91    3.56 
  13   1  -2   18.36    5.21 
  13  -1  -2   17.54    4.66 
 -13  -1   2   17.54    3.84 
 -13   1   2   14.25    3.84 
 -13  -1   2   15.62    3.84 
 -13   1   2   16.72    4.66 
 -13  -1   2   15.07    3.56 
 -13   1   2   16.44    4.38 
  14   1  -2   82.22    5.21 
  14  -1  -2   85.50    5.21 
  14   1  -2   78.65    4.66 
  14  -1  -2   83.59    5.21 
 -14   1   2   73.99    6.03 
 -14  -1   2   83.04    5.76 
  14   1  -2   74.82    6.03 
  14  -1  -2   80.02    5.21 
  14   1  -2   77.56    5.48 
  14  -1  -2   83.04    6.30 
 -14  -1   2   77.28    5.48 
 -14   1   2   73.17    5.48 
 -14  -1   2   76.73    6.58 
 -14   1   2   73.72    5.76 
 -14  -1   2   74.27    5.21 
 -14   1   2   78.93    6.30 
  15  -1  -2    3.84    4.38 
  15   1  -2    6.58    3.01 
  15   1  -2    3.84    3.56 
  15  -1  -2    5.21    3.29 
 -15  -1   2    6.58    4.93 
 -15   1   2    4.38    3.84 
  15   1  -2    7.40    3.84 
  15  -1  -2    6.30    3.56 
  15   1  -2    5.76    3.84 
  15  -1  -2    3.56    4.93 
 -15  -1   2    5.76    5.21 
 -15   1   2    5.48    4.93 
 -15  -1   2    3.01    4.93 
 -15   1   2    4.93    3.84 
 -15  -1   2    4.93    3.84 
 -15   1   2    7.13    4.93 
  16  -1  -2    2.47    3.56 
  16   1  -2    4.11    3.29 
  16   1  -2    2.19    3.56 
  16  -1  -2    1.92    4.66 
 -16  -1   2    3.01    4.38 
 -16   1   2    2.74    4.11 
  16   1  -2    2.74    3.84 
  16  -1  -2    4.11    3.56 
  16   1  -2    1.10    4.66 
  16  -1  -2   -0.55    5.48 
 -16  -1   2    3.84    4.11 
 -16   1   2    1.92    4.11 
 -16  -1   2    0.82    4.66 
 -16   1   2    0.00    5.21 
 -16  -1   2    0.00    4.93 
 -16   1   2    1.37    5.48 
  17  -1  -2   20.83    5.48 
  17   1  -2   17.27    4.66 
  17   1  -2   17.81    3.84 
  17  -1  -2   17.27    4.93 
 -17  -1   2   15.62    4.66 
 -17   1   2   15.62    6.30 
  17   1  -2   18.64    4.38 
  17  -1  -2   18.36    4.38 
  17   1  -2   15.89    4.66 
  17  -1  -2   20.01    5.76 
 -17  -1   2   14.52    4.66 
 -17   1   2   13.70    4.66 
 -17  -1   2   16.44    4.93 
 -17   1   2   15.62    4.66 
 -17  -1   2   14.25    4.66 
 -17   1   2   16.72    6.58 
  18  -1  -2    0.27    4.11 
  18   1  -2    1.64    5.21 
  18   1  -2    0.55    3.56 
  18  -1  -2    1.64    4.93 
 -18  -1   2   -0.55    5.48 
 -18   1   2    2.74    4.66 
  18   1  -2   -0.27    4.11 
  18  -1  -2    0.55    4.11 
  18   1  -2    1.10    4.38 
  18  -1  -2    0.55    5.76 
 -18  -1   2    0.82    4.38 
 -18   1   2   -0.55    5.21 
 -18  -1   2    1.92    4.66 
 -18   1   2    2.19    5.21 
 -18  -1   2    3.29    6.30 
 -18   1   2    0.82    5.76 
  19  -1  -2   50.15    6.85 
  19   1  -2   60.84    6.58 
  19   1  -2   53.71    5.21 
  19  -1  -2   52.07    6.03 
 -19   1   2   47.96    7.67 
 -19  -1   2   44.40    6.03 
  19   1  -2   52.89    5.76 
  19  -1  -2   53.71    5.48 
  19   1  -2   47.14    5.76 
  19  -1  -2   49.33    6.03 
 -19  -1   2   48.51    7.13 
 -19   1   2   61.94    6.58 
 -19  -1   2   49.88    6.03 
 -19   1   2   58.92    6.03 
 -19  -1   2   55.91    6.03 
 -19   1   2   45.77    7.13 
  20  -1  -2    1.10    4.93 
  20  -1  -2    1.37    5.76 
 -20  -1   2   -1.37    5.76 
 -20   1   2    0.00    5.48 
  20   1  -2    3.84    4.66 
  20  -1  -2    0.00    4.66 
  20   1  -2   -0.55    4.93 
  20  -1  -2    2.47    5.21 
 -20  -1   2   -0.55    4.93 
 -20   1   2    0.27    5.76 
 -20  -1   2    1.10    5.48 
 -20   1   2    3.01    5.48 
 -20  -1   2    0.55    5.21 
 -20   1   2    1.64    6.85 
  21  -1  -2   31.52    7.13 
  21  -1  -2   28.78    6.58 
 -21  -1   2   28.78    6.30 
 -21   1   2   27.13    6.30 
  21   1  -2   26.86    5.48 
  21  -1  -2   26.31    5.76 
  21   1  -2   24.94    5.76 
  21  -1  -2   26.31    5.76 
 -21  -1   2   20.01    5.76 
 -21   1   2   24.66    6.03 
 -21  -1   2   24.94    6.30 
 -21   1   2   18.64    6.58 
 -21  -1   2   23.84    6.85 
 -21   1   2   25.76    7.40 
  22  -1  -2    6.30    6.85 
  22  -1  -2    8.77    5.76 
 -22  -1   2    8.22    7.95 
 -22   1   2    6.85    8.22 
  22   1  -2    3.29    5.21 
  22  -1  -2    1.92    5.48 
  22   1  -2    5.48    6.03 
  22  -1  -2    4.66    5.76 
 -22  -1   2    8.50    5.76 
 -22   1   2    5.76    5.76 
 -22  -1   2    8.77    6.30 
 -22   1   2    2.74    7.67 
 -22  -1   2    4.66    6.03 
 -22   1   2    4.11    7.95 
 -22   2  -2   38.64    8.50 
  22  -2   2   48.78    6.58 
 -22  -2  -2   43.03    7.40 
 -22   2  -2   52.62    6.85 
  22   2   2   42.75    6.58 
  22  -2   2   51.25    6.58 
  22   2   2   56.18    6.85 
  22  -2   2   50.97    6.58 
 -22  -2  -2   45.49    6.58 
 -22   2  -2   49.88    6.58 
 -22  -2  -2   45.77    6.85 
 -22   2  -2   41.93    6.85 
 -22  -2  -2   45.77    8.22 
 -22   2  -2   48.51    6.85 
 -21   2  -2   19.73    5.76 
  21  -2   2   16.99    6.30 
 -21  -2  -2   12.33    5.48 
 -21   2  -2    9.87    5.76 
  21   2   2   17.27    5.48 
  21  -2   2   13.70    5.48 
  21   2   2   17.81    5.76 
  21  -2   2   15.07    5.76 
 -21  -2  -2   16.44    5.76 
 -21   2  -2   15.35    7.67 
 -21  -2  -2   14.52    6.03 
 -21   2  -2   12.06    6.85 
 -21  -2  -2   15.62    5.76 
 -21   2  -2   13.15    5.76 
 -20   2  -2   -2.74    4.66 
  20  -2   2   -0.55    4.93 
 -20  -2  -2    0.00    4.93 
 -20   2  -2   -1.37    5.48 
  20   2   2   -0.82    4.93 
  20  -2   2    2.47    5.76 
  20   2   2   -1.64    5.48 
  20  -2   2   -0.82    4.93 
 -20  -2  -2   -1.64    6.03 
 -20   2  -2   -1.10    4.93 
 -20  -2  -2    0.00    5.21 
 -20   2  -2    1.37    5.48 
 -20  -2  -2   -0.55    6.85 
 -20   2  -2    1.37    5.21 
 -19   2  -2   54.81    7.40 
  19  -2   2   59.47    6.30 
 -19  -2  -2   57.00    6.58 
 -19   2  -2   45.49    6.03 
  19   2   2   50.15    6.03 
  19  -2   2   54.54    6.03 
  19   2   2   52.62    6.58 
  19  -2   2   56.18    6.58 
 -19  -2  -2   50.15    7.95 
 -19   2  -2   48.78    7.13 
 -19  -2  -2   43.85    6.30 
 -19   2  -2   47.41    7.13 
 -19  -2  -2   53.17    6.58 
 -19   2  -2   45.49    6.30 
 -18   2  -2    3.56    4.11 
  18  -2   2    1.37    3.84 
 -18  -2  -2    1.10    5.21 
 -18   2  -2    3.01    6.30 
  18   2   2    1.10    4.38 
  18  -2   2    1.10    4.93 
  18   2   2   -0.27    5.48 
  18  -2   2    1.10    4.38 
 -18  -2  -2    1.10    4.66 
 -18   2  -2    0.82    4.38 
  18  -2   2   -1.10    4.38 
 -18  -2  -2    3.01    4.93 
 -18   2  -2    1.10    4.66 
 -18  -2  -2    1.10    6.03 
 -17   2  -2   14.80    5.21 
  17  -2   2   24.66    4.11 
 -17  -2  -2   19.46    5.76 
 -17   2  -2   20.55    4.93 
  17   2   2   20.01    6.03 
  17  -2   2   19.73    5.48 
  17   2   2   23.57    5.48 
  17  -2   2   22.47    4.66 
 -17  -2  -2   21.92    4.93 
 -17   2  -2   23.02    6.30 
  17  -2   2   20.55    4.66 
 -17  -2  -2   24.39    5.21 
 -17   2  -2   19.18    4.93 
 -17  -2  -2   21.10    4.93 
 -16   2  -2   30.97    4.38 
  16  -2   2   38.37    4.38 
  16   2   2   35.08    5.21 
  16   2   2   31.24    5.21 
 -16  -2  -2   35.35    5.21 
 -16   2  -2   32.89    4.66 
  16   2   2   37.82    4.66 
  16  -2   2   33.43    4.66 
  16   2   2   36.45    4.93 
  16  -2   2   34.26    4.66 
 -16  -2  -2   31.24    4.93 
 -16   2  -2   30.69    4.66 
  16  -2   2   30.97    6.30 
 -16  -2  -2   32.34    5.21 
 -16   2  -2   30.42    6.03 
 -16  -2  -2   33.98    6.58 
 -15   2  -2  172.65    9.32 
  15  -2   2  171.56    9.32 
  15   2   2  226.64   11.51 
 -15  -2  -2  190.74   10.14 
 -15   2  -2  180.05    9.59 
  15   2   2  199.51   10.14 
  15  -2   2  194.30    9.87 
  15   2   2  203.35   10.41 
  15  -2   2  204.72   10.41 
 -15  -2  -2  175.39   10.41 
 -15   2  -2  184.98    9.87 
  15  -2   2  193.48   10.69 
 -15  -2  -2  199.78   10.41 
 -15   2  -2  191.01   10.41 
 -15  -2  -2  190.74   10.14 
 -14   2  -2   12.61    3.56 
  14  -2   2   13.98    3.29 
  14   2   2   17.27    4.93 
 -14  -2  -2   16.99    4.11 
 -14   2  -2   13.98    4.38 
  14   2   2   15.35    3.84 
  14  -2   2   13.70    3.56 
  14   2   2   16.72    4.11 
  14  -2   2   14.52    3.56 
 -14  -2  -2   15.35    4.11 
 -14   2  -2   14.80    4.66 
  14  -2   2   15.35    4.11 
 -14  -2  -2   19.73    4.38 
 -14   2  -2   14.80    4.11 
 -14  -2  -2   15.89    4.11 
 -13   2  -2    5.48    3.01 
  13  -2   2    6.85    4.11 
  13   2   2    6.58    3.01 
  13   2   2   -0.27    2.47 
 -13  -2  -2    5.48    4.38 
 -13   2  -2    7.67    3.29 
  13   2   2    5.76    3.56 
  13  -2   2    6.58    3.29 
  13   2   2    6.03    3.56 
  13  -2   2    4.66    4.38 
 -13  -2  -2    7.13    4.38 
 -13   2  -2    6.30    4.38 
  13  -2   2    5.21    3.56 
 -13  -2  -2    3.84    3.56 
 -13   2  -2    3.84    4.38 
 -13  -2  -2    4.93    4.93 
 -12   2  -2    2.19    3.84 
  12  -2   2    3.29    2.74 
  12   2   2    2.74    3.84 
 -12  -2  -2    3.01    3.29 
 -12   2  -2    3.01    3.01 
  12   2   2    3.01    3.29 
  12  -2   2    3.01    3.01 
  12   2   2    3.84    3.56 
  12  -2   2    4.38    3.56 
 -12  -2  -2    3.56    3.29 
 -12   2  -2    2.74    3.56 
 -12  -2  -2    4.93    4.38 
  12  -2   2    1.10    3.29 
 -12   2  -2    4.11    4.11 
 -12  -2  -2    1.64    3.84 
 -11  -2  -2    8.22    3.84 
 -11   2  -2    6.85    2.74 
  11  -2   2    8.50    2.74 
  11   2   2    8.50    3.56 
 -11  -2  -2    5.48    3.01 
 -11   2  -2    5.48    3.56 
  11   2   2    8.77    4.38 
  11  -2   2    8.50    3.56 
  11   2   2    6.03    4.38 
 -11  -2  -2    7.13    4.11 
  11  -2   2    6.85    3.01 
 -11   2  -2    6.58    2.74 
 -11  -2  -2    6.58    4.66 
  11  -2   2    7.13    3.84 
 -11   2  -2    6.58    4.11 
 -11  -2  -2    9.04    3.29 
 -10  -2  -2    8.50    3.29 
 -10   2  -2    8.50    2.74 
  10  -2   2    9.32    3.29 
  10   2   2    9.32    3.29 
 -10  -2  -2    8.77    3.01 
 -10   2  -2    7.95    3.56 
  10   2   2    8.50    3.01 
  10  -2   2    7.13    2.74 
  10   2   2    9.32    3.01 
 -10  -2  -2    7.40    4.11 
  10  -2   2    7.95    3.56 
 -10   2  -2    9.04    3.29 
 -10  -2  -2   10.14    3.29 
  10  -2   2    8.22    3.29 
 -10   2  -2    7.67    3.29 
 -10  -2  -2    8.77    3.01 
  -9  -2  -2  226.37    9.04 
  -9   2  -2  211.02    9.04 
   9  -2   2  213.76    8.77 
   9   2   2  241.99    7.40 
  -9  -2  -2  216.77    8.77 
  -9   2  -2  213.49    8.77 
   9   2   2  231.57    9.32 
   9  -2   2  226.91    9.04 
   9   2   2  226.64    9.04 
  -9  -2  -2  209.10    9.32 
   9  -2   2  222.80    9.32 
  -9   2  -2  219.24    8.77 
  -9  -2  -2  225.82    9.32 
   9  -2   2  210.47    9.04 
  -9   2  -2  232.12    9.59 
  -9  -2  -2  218.14    9.04 
  -8   2  -2  237.88    7.95 
  -8  -2  -2  246.65    8.22 
   8  -2   2  213.21    8.77 
   8   2   2  242.26    7.40 
  -8  -2  -2  212.94    8.77 
   8   2   2  231.30    9.59 
  -8   2  -2  232.39    9.04 
   8  -2   2  230.75    9.04 
   8   2   2  242.26    7.95 
  -8  -2  -2  237.33    7.95 
   8  -2   2  237.05    7.95 
  -8   2  -2  242.53    7.95 
  -8  -2  -2  232.39    9.87 
   8  -2   2  238.97    7.95 
  -8   2  -2  245.55    9.04 
  -8  -2  -2  227.74    9.59 
  -7   2  -2  429.71   11.24 
   7  -2   2  442.59   11.24 
   7   2   2  464.52   11.78 
  -7  -2  -2  400.66   11.51 
   7   2   2  445.61   11.78 
  -7   2  -2  429.16   11.51 
   7  -2   2  444.51   11.51 
  -7  -2  -2  473.83   12.88 
   7  -2   2  448.89   11.78 
  -7   2  -2  446.15   11.51 
  -7  -2  -2  444.78   12.06 
   7  -2   2  445.06   11.78 
  -7   2  -2  445.06   12.06 
  -7  -2  -2  421.76   11.51 
  -6   2  -2   31.52    3.29 
   6  -2   2   30.97    3.84 
  -6  -2  -2   28.78    3.56 
   6   2   2   32.61    3.84 
  -6  -2  -2   28.78    3.84 
   6   2   2   29.32    4.11 
  -6   2  -2   29.87    3.84 
   6  -2   2   33.98    3.29 
   6   2   2   30.42    3.56 
  -6  -2  -2   32.89    4.11 
   6  -2   2   30.69    3.56 
  -6   2  -2   30.15    3.29 
   6  -2   2   29.60    3.56 
  -6   2  -2   33.43    3.84 
  -6  -2  -2   31.52    4.38 
   6   2   2   30.42    3.56 
  -5   2  -2  131.27    6.03 
   5  -2   2  129.90    5.48 
  -5  -2  -2  121.40    5.76 
   5   2   2  135.11    5.76 
  -5   2  -2  138.40    6.03 
  -5  -2  -2  137.03    6.30 
   5   2   2  138.94    6.30 
  -5   2  -2  133.19    6.03 
   5   2   2  134.56    6.30 
  -5  -2  -2  149.63    6.30 
   5  -2   2  137.57    5.76 
  -5   2  -2  142.78    6.30 
   5  -2   2  145.52    6.85 
  -5   2  -2  153.47    6.85 
  -5  -2  -2  139.77    6.58 
   5   2   2  136.48    6.03 
  -4   2  -2  174.30    6.58 
   4  -2   2  168.27    6.03 
  -4  -2  -2  163.33    6.03 
   4   2   2  154.02    5.76 
  -4   2  -2  163.06    6.30 
  -4  -2  -2  164.43    6.58 
   4   2   2  167.17    6.30 
  -4   2  -2  160.05    6.30 
   4   2   2  163.06    6.30 
  -4  -2  -2  155.39    6.85 
   4  -2   2  169.36    6.58 
  -4   2  -2  169.09    6.58 
   4  -2   2  161.96    6.58 
  -4   2  -2  161.96    7.13 
  -4  -2  -2  165.25    6.58 
   4   2   2  174.57    6.85 
  -3   2  -2   27.13    3.01 
   3  -2   2   24.39    3.29 
  -3  -2  -2   24.39    2.74 
   3  -2   2   26.31    3.56 
  -3   2  -2   27.13    3.56 
  -3  -2  -2   24.94    3.29 
   3   2   2   22.75    3.01 
   3   2   2   26.86    3.56 
  -3  -2  -2   24.94    3.56 
   3  -2   2   27.13    3.01 
  -3   2  -2   29.87    3.29 
   3  -2   2   26.86    3.84 
  -3   2  -2   28.78    3.56 
  -3  -2  -2   26.58    3.29 
   3   2   2   30.42    4.11 
  -2  -2  -2    0.55    1.64 
  -2   2  -2    0.82    2.47 
   2  -2   2    0.55    1.64 
  -2  -2  -2    0.55    1.92 
   2  -2   2    0.55    2.47 
  -2   2  -2    0.55    2.74 
  -2  -2  -2    1.10    1.64 
   2   2   2    0.55    1.92 
  -2  -2  -2    0.55    1.92 
   2  -2   2    0.55    3.01 
  -2  -2  -2   -0.27    2.74 
   2  -2   2    0.55    2.19 
  -2   2  -2    1.37    2.47 
  -2  -2  -2    1.92    2.74 
   2   2   2    0.82    2.74 
  -1  -2  -2  235.41    9.59 
  -1   2  -2  220.88    6.85 
   1  -2   2  237.60    9.87 
  -1  -2  -2  223.35    9.32 
   1  -2   2  214.58    7.67 
  -1   2  -2  231.85    9.87 
  -1  -2  -2  218.69    7.13 
   1   2   2  224.17    9.59 
  -1   2  -2  231.85    9.87 
   1  -2   2  246.37   10.41 
  -1  -2  -2  226.09    9.87 
   1   2   2  238.15   10.14 
   1  -2   2  228.01   10.14 
  -1   2  -2  236.23   10.14 
  -1  -2  -2  223.35    9.87 
   1   2   2  226.91    9.87 
   0  -2  -2  315.98   12.06 
   0   2  -2  314.06   12.06 
   0  -2   2  330.50   12.61 
   0  -2  -2  311.60   12.06 
   0  -2   2  296.52   12.06 
   0   2  -2  357.91   13.98 
   0  -2  -2  323.11   12.33 
   0   2   2  324.48   12.33 
   0   2  -2  331.05   12.88 
   0  -2   2  334.07   12.88 
   0  -2  -2  318.45   12.61 
   0   2   2  326.12   12.88 
   0  -2   2  318.45   12.61 
   0   2  -2  332.15   13.15 
   0  -2  -2  328.04   12.88 
   0   2   2  324.48   12.61 
   1  -2  -2 4030.46   40.83 
   1  -2  -2 4043.34   45.49 
   1   2  -2 4043.89   45.77 
  -1  -2   2 4058.41   46.04 
  -1   2   2 4059.78   44.67 
  -1   2   2 4093.76   45.77 
  -2  -2   2 4212.43   44.12 
   2   2  -2 4265.32   44.67 
   2   2  -2 4268.06   46.59 
  -2  -2   2 4241.48   48.23 
   2  -2  -2 4228.32   46.59 
  -2  -2   2 4205.03   49.33 
  -2   2   2 4182.01   48.23 
  -3   2   2 3627.06   48.51 
  -4   2   2  784.33   14.25 
   4  -2  -2  821.88   14.80 
   4   2  -2  765.15   13.98 
  -4  -2   2  812.56   14.52 
  -4  -2   2  782.41   15.62 
   4   2  -2  742.68   15.89 
   4   2  -2  790.36   15.35 
  -4  -2   2  790.91   14.80 
  -4   2   2  792.01   15.07 
   4  -2  -2  735.00   14.80 
  -4   2   2  819.14   15.62 
  -4  -2   2  781.32   15.35 
   4   2  -2  810.91   15.35 
  -5   2   2   50.97    4.38 
   5  -2  -2   48.23    3.84 
   5   2  -2   52.07    3.56 
  -5  -2   2   45.49    3.56 
  -5   2   2   53.44    4.11 
  -5  -2   2   52.07    4.66 
   5   2  -2   54.26    4.66 
   5  -2  -2   54.54    3.84 
   5   2  -2   47.68    4.11 
  -5  -2   2   53.44    4.38 
   5  -2  -2   60.57    4.93 
  -5   2   2   57.82    4.66 
   5  -2  -2   60.02    4.11 
  -5   2   2   54.54    4.38 
  -5  -2   2   52.89    4.38 
   5   2  -2   49.60    4.11 
  -6   2   2  246.37   10.41 
   6  -2  -2  250.21   10.14 
   6   2  -2  229.38    9.59 
  -6  -2   2  253.22   10.41 
  -6   2   2  238.70   10.14 
  -6  -2   2  238.15   10.14 
   6   2  -2  244.45   10.14 
   6  -2  -2  253.77   10.41 
   6   2  -2  240.62   10.14 
  -6  -2   2  238.15   10.14 
   6  -2  -2  244.73   10.41 
  -6   2   2  252.67   10.69 
   6  -2  -2  242.26   10.14 
  -6   2   2  250.21   10.69 
  -6  -2   2  246.37   10.69 
   6   2  -2  255.14   10.69 
  -7   2   2    1.64    3.01 
   7  -2  -2    1.10    2.19 
   7   2  -2    1.92    1.92 
  -7  -2   2    1.92    1.92 
  -7   2   2    2.47    2.19 
  -7  -2   2    1.37    2.47 
   7   2  -2    2.74    2.47 
   7  -2  -2    2.19    2.19 
   7   2  -2    2.74    2.74 
  -7  -2   2    1.92    3.84 
   7  -2  -2    3.29    2.47 
  -7   2   2    1.64    3.56 
   7  -2  -2    3.01    2.19 
  -7   2   2    3.01    3.01 
  -7  -2   2    2.74    3.01 
   7   2  -2    2.19    2.74 
  -8   2   2  196.77    8.22 
   8  -2  -2  198.96    8.50 
   8   2  -2  193.21    7.95 
  -8  -2   2  162.79    7.67 
  -8  -2   2  197.32    8.50 
  -8   2   2  198.41    8.50 
   8   2  -2  225.54    9.32 
   8  -2  -2  217.05    8.77 
   8   2  -2  198.69    8.50 
  -8  -2   2  198.41    8.77 
   8  -2  -2  200.06    8.50 
  -8   2   2  167.44    8.22 
   8  -2  -2  196.49    8.50 
  -8   2   2  204.17    9.04 
  -8  -2   2  194.58    8.50 
   8   2  -2  202.52    8.77 
  -9   2   2   71.80    4.38 
   9   2  -2   77.83    4.66 
   9  -2  -2   77.28    4.66 
   9   2  -2   75.64    4.11 
  -9  -2   2   55.63    4.93 
  -9   2   2   65.22    4.93 
   9   2  -2   72.90    4.66 
   9  -2  -2   67.96    4.66 
   9   2  -2   73.99    4.93 
  -9  -2   2   78.10    5.21 
   9  -2  -2   70.98    4.66 
  -9   2   2   69.61    4.93 
   9  -2  -2   70.98    4.66 
  -9   2   2   70.70    4.66 
  -9  -2   2   69.33    5.21 
   9   2  -2   73.17    5.48 
 -10   2   2    9.59    3.56 
  10   2  -2   10.14    3.01 
  10  -2  -2   12.06    3.01 
  10   2  -2   10.69    2.19 
 -10  -2   2    7.95    3.29 
 -10   2   2    8.77    3.29 
  10   2  -2   10.14    3.56 
  10  -2  -2   11.24    3.29 
  10   2  -2   11.24    3.56 
 -10  -2   2   10.69    3.29 
  10  -2  -2   10.14    4.38 
 -10   2   2   10.41    4.38 
 -10  -2   2    8.77    3.56 
  10  -2  -2   10.41    2.74 
 -10   2   2    9.59    3.01 
 -10  -2   2   10.69    4.11 
 -11   2   2    8.77    3.01 
  11   2  -2   13.43    2.47 
  11  -2  -2   13.43    3.01 
  11   2  -2   11.24    2.74 
 -11  -2   2   11.51    3.56 
 -11   2   2   11.51    3.01 
  11   2  -2   11.51    3.29 
  11  -2  -2   10.69    3.01 
  11   2  -2   12.88    4.66 
 -11  -2   2    8.50    3.56 
  11  -2  -2   10.96    3.29 
 -11   2   2    8.22    3.29 
 -11  -2   2   10.14    3.84 
  11  -2  -2    9.59    3.01 
 -11   2   2    7.95    4.11 
 -11  -2   2    9.04    3.01 
 -12   2   2   73.72    4.93 
  12   2  -2   82.49    5.21 
  12  -2  -2   86.05    5.76 
  12   2  -2   82.76    4.66 
 -12  -2   2   75.91    5.21 
 -12   2   2   83.31    5.21 
  12   2  -2   80.02    5.76 
  12  -2  -2   81.12    4.93 
  12   2  -2   83.04    5.48 
  12  -2  -2   89.34    6.58 
 -12  -2   2   80.57    5.48 
 -12   2   2   80.30    5.48 
 -12  -2   2   75.09    5.76 
  12  -2  -2   79.47    5.21 
 -12   2   2   75.64    5.21 
 -12  -2   2   75.36    6.03 
 -13   2   2   19.18    4.38 
  13   2  -2   22.75    3.56 
  13  -2  -2   24.66    4.11 
  13   2  -2   22.20    3.56 
 -13  -2   2   19.46    4.11 
 -13   2   2   20.28    4.11 
  13   2  -2   20.28    3.84 
  13  -2  -2   20.83    3.56 
  13   2  -2   22.75    4.11 
  13  -2  -2   19.46    4.11 
 -13  -2   2   19.46    4.11 
 -13   2   2   21.10    4.11 
  13  -2  -2   20.55    4.38 
 -13  -2   2   20.83    4.11 
 -13   2   2   18.64    3.84 
 -13  -2   2   21.92    4.38 
 -14   2   2   13.98    3.56 
  14   2  -2   16.72    3.84 
  14  -2  -2   15.35    3.56 
  14   2  -2   15.35    3.29 
 -14  -2   2   15.89    4.11 
 -14   2   2   14.52    4.93 
  14   2  -2   16.72    3.84 
  14  -2  -2   15.62    3.84 
  14   2  -2   17.27    4.93 
  14  -2  -2   13.70    4.11 
 -14  -2   2   18.09    4.66 
 -14   2   2   15.07    4.11 
  14  -2  -2   14.25    3.56 
 -14  -2   2   13.43    3.84 
 -14   2   2   13.43    3.84 
 -14  -2   2   14.80    3.84 
  15   2  -2    0.00    3.84 
  15  -2  -2   -1.64    3.29 
  15   2  -2    1.10    2.74 
  15  -2  -2    0.55    3.29 
 -15  -2   2    0.55    4.11 
 -15   2   2   -0.27    3.56 
  15   2  -2   -0.82    3.56 
  15  -2  -2   -1.37    3.84 
  15   2  -2   -0.27    3.84 
  15  -2  -2    0.55    5.48 
 -15  -2   2   -1.64    5.21 
 -15   2   2    1.64    3.84 
  15  -2  -2    0.00    3.56 
 -15  -2   2   -0.55    3.84 
 -15   2   2    1.92    3.84 
 -15  -2   2    1.64    3.56 
  16  -2  -2   16.72    5.48 
  16   2  -2   16.17    4.38 
  16   2  -2   15.07    4.11 
  16  -2  -2   16.17    3.84 
 -16  -2   2   13.98    4.66 
 -16   2   2   10.69    4.66 
  16   2  -2   14.25    5.21 
  16  -2  -2   15.62    4.93 
  16   2  -2   14.52    4.38 
  16  -2  -2   14.52    4.38 
 -16  -2   2   12.61    6.03 
 -16   2   2   17.81    4.38 
 -16  -2   2   14.80    5.48 
 -16   2   2   14.52    4.38 
 -16  -2   2   15.89    4.66 
  17  -2  -2  404.77   19.18 
  17   2  -2  413.27   19.73 
  17   2  -2  378.46   18.09 
  17  -2  -2  412.99   20.01 
 -17  -2   2  355.17   18.64 
 -17   2   2  353.80   17.54 
  17   2  -2  360.65   17.81 
  17  -2  -2  374.08   18.36 
  17   2  -2  374.90   18.36 
  17  -2  -2  351.61   17.54 
 -17  -2   2  347.22   17.27 
 -17   2   2  393.54   19.73 
 -17  -2   2  384.49   18.91 
 -17   2   2  368.87   18.64 
 -17  -2   2  363.39   18.36 
 -17   2   2  368.60   18.09 
  18  -2  -2   63.03    6.30 
  18   2  -2   66.32    6.30 
  18   2  -2   63.31    6.58 
  18  -2  -2   50.97    6.58 
 -18   2   2   53.99    6.85 
 -18  -2   2   53.17    6.58 
  18   2  -2   66.87    6.58 
  18  -2  -2   56.18    6.03 
  18   2  -2   61.66    6.58 
  18  -2  -2   62.21    6.58 
 -18  -2   2   55.91    6.30 
 -18   2   2   57.28    6.30 
 -18  -2   2   56.45    6.58 
 -18   2   2   55.08    6.85 
 -18  -2   2   66.05    6.85 
 -18   2   2   56.18    6.30 
  19  -2  -2  126.61    9.87 
  19  -2  -2  116.20    9.32 
 -19  -2   2  105.51    9.04 
 -19   2   2  112.09    9.04 
  19   2  -2  116.75    8.77 
  19  -2  -2  117.29    8.77 
  19   2  -2  119.49    9.04 
  19  -2  -2  128.80    9.59 
 -19  -2   2  116.20    9.04 
 -19   2   2  116.47    9.04 
 -19  -2   2  118.66   10.69 
 -19   2   2  112.63    9.04 
 -19  -2   2  109.35    8.77 
 -19   2   2  124.42    9.32 
  20  -2  -2    0.27    5.21 
  20  -2  -2    2.19    6.30 
 -20  -2   2    3.29    5.48 
 -20   2   2    2.74    7.40 
  20   2  -2    2.19    4.93 
  20  -2  -2    3.56    4.93 
  20   2  -2    2.19    5.48 
  20  -2  -2    1.64    4.93 
 -20  -2   2    1.10    5.21 
 -20   2   2    0.00    6.58 
 -20  -2   2    2.74    6.85 
 -20   2   2    1.37    7.40 
 -20  -2   2    1.92    5.21 
 -20   2   2   -2.47    6.85 
  21  -2  -2    3.01    5.21 
  21  -2  -2    2.19    6.03 
 -21  -2   2    3.84    5.76 
 -21   2   2    1.64    5.76 
  21   2  -2    1.92    4.93 
  21  -2  -2    0.00    5.21 
  21   2  -2    0.82    5.48 
  21  -2  -2    1.64    5.21 
 -21  -2   2    3.29    5.21 
 -21   2   2    1.10    5.21 
 -21  -2   2    1.10    6.03 
 -21   2   2    1.37    5.76 
 -21  -2   2   -0.27    5.76 
 -21   2   2    1.64    7.40 
  22  -2  -2    1.92    7.67 
  22  -2  -2    1.37    5.48 
 -22   2   2    2.74    6.58 
 -22  -2   2    5.21    6.30 
  22   2  -2    4.38    5.48 
  22  -2  -2    4.93    5.76 
  22   2  -2    6.85    7.95 
  22  -2  -2    3.01    5.48 
 -22  -2   2    1.10    6.03 
 -22   2   2    1.37    7.13 
 -22  -2   2    5.48    6.30 
 -22   2   2    2.19    6.85 
 -22  -2   2    2.74    6.03 
 -22   2   2    4.66    7.40 
 -21   3  -2    1.92    5.21 
  21  -3   2    3.56    4.93 
 -21  -3  -2    3.56    5.48 
 -21   3  -2    0.00    5.76 
  21   3   2    3.01    5.21 
  21  -3   2    3.84    5.76 
  21   3   2   -0.27    5.48 
  21  -3   2    2.74    5.48 
 -21  -3  -2    0.00    5.48 
 -21   3  -2    3.84    5.48 
 -21  -3  -2    0.55    6.58 
 -21   3  -2    6.30    7.40 
 -21  -3  -2    6.03    7.13 
 -20   3  -2   45.22    6.58 
  20  -3   2   48.51    5.76 
 -20  -3  -2   37.00    5.76 
 -20   3  -2   46.59    7.67 
  20   3   2   41.93    5.76 
  20  -3   2   49.33    7.13 
  20   3   2   46.04    8.22 
  20  -3   2   36.72    7.13 
 -20  -3  -2   39.19    6.03 
 -20   3  -2   43.03    6.85 
  20  -3   2   39.46    7.40 
 -20  -3  -2   42.75    7.95 
 -20   3  -2   43.57    6.58 
 -20  -3  -2   46.04    6.30 
 -19   3  -2   78.93    6.03 
  19  -3   2   80.57    6.85 
 -19  -3  -2   73.72    6.30 
 -19   3  -2   68.51    6.85 
  19   3   2   82.49    7.67 
  19  -3   2   82.22    6.30 
  19   3   2   84.96    6.58 
  19  -3   2   89.34    7.95 
 -19  -3  -2   76.19    6.58 
 -19   3  -2   77.56    7.40 
  19  -3   2   73.17    6.58 
 -19  -3  -2   77.83    8.77 
 -19   3  -2   73.72    7.13 
 -19  -3  -2   77.56    6.58 
 -18   3  -2    1.64    4.11 
  18  -3   2    9.87    5.48 
 -18  -3  -2    6.58    6.03 
 -18   3  -2    6.03    4.66 
  18   3   2    7.40    4.66 
  18  -3   2    6.58    4.38 
  18   3   2    9.32    4.93 
  18  -3   2    3.56    4.93 
 -18  -3  -2    4.11    5.48 
 -18   3  -2    3.01    4.38 
  18  -3   2    6.30    4.66 
 -18  -3  -2    3.56    6.30 
 -18   3  -2    6.85    4.93 
 -18  -3  -2    7.13    5.48 
 -17   3  -2    1.92    4.66 
  17  -3   2    2.19    3.84 
 -17  -3  -2    2.19    4.38 
 -17   3  -2    2.19    5.21 
  17   3   2    3.56    4.11 
  17  -3   2    1.92    4.38 
  17   3   2    3.56    4.38 
  17  -3   2    2.47    4.11 
 -17  -3  -2    2.19    4.66 
 -17   3  -2    3.84    4.11 
  17  -3   2    1.10    4.38 
 -17  -3  -2    3.84    4.93 
 -17   3  -2    0.82    4.66 
 -17  -3  -2    3.29    4.66 
 -16   3  -2    5.76    3.84 
  16  -3   2    6.03    3.84 
 -16  -3  -2    4.66    4.38 
 -16   3  -2    6.30    4.38 
  16   3   2    3.29    5.21 
  16  -3   2    3.01    4.11 
  16   3   2    7.40    4.38 
  16  -3   2    4.11    3.84 
 -16  -3  -2    3.29    4.38 
 -16   3  -2    2.47    3.84 
  16  -3   2    3.29    4.38 
 -16  -3  -2    4.38    4.38 
 -16   3  -2    7.13    4.66 
 -16  -3  -2    6.03    4.38 
 -15   3  -2   18.36    4.93 
  15  -3   2   21.92    4.93 
 -15  -3  -2   20.28    6.03 
 -15   3  -2   17.27    4.11 
  15   3   2   20.01    4.38 
  15  -3   2   16.99    4.11 
  15   3   2   20.83    4.38 
  15  -3   2   20.28    5.21 
 -15  -3  -2   19.18    6.03 
 -15   3  -2   20.28    4.11 
  15  -3   2   20.28    5.48 
 -15  -3  -2   18.91    4.66 
 -15   3  -2   18.91    4.66 
 -15  -3  -2   18.91    6.03 
 -14   3  -2   76.46    5.21 
  14  -3   2   84.41    5.21 
 -14  -3  -2   90.71    6.03 
 -14   3  -2   86.33    5.48 
  14   3   2   91.26    6.30 
  14  -3   2   83.31    5.21 
  14   3   2   87.70    5.76 
 -14  -3  -2   81.12    5.76 
  14  -3   2   83.31    5.48 
 -14   3  -2   82.49    5.48 
 -14  -3  -2   87.42    6.03 
  14  -3   2   83.59    5.76 
 -14   3  -2   73.45    6.30 
 -14  -3  -2   70.16    6.30 
 -13   3  -2  143.33    7.40 
  13  -3   2  147.99    7.95 
 -13  -3  -2  161.14    8.22 
 -13   3  -2  126.89    7.40 
  13   3   2  152.65    7.67 
  13  -3   2  140.86    7.13 
  13   3   2  154.56    7.95 
 -13  -3  -2  141.96    8.50 
  13  -3   2  143.88    7.95 
 -13   3  -2  138.12    7.13 
 -13  -3  -2  140.31    8.22 
  13  -3   2  141.68    7.67 
 -13   3  -2  139.77    7.95 
 -13  -3  -2  152.65    8.22 
 -12   3  -2   12.33    3.84 
  12  -3   2   12.06    3.29 
 -12  -3  -2   13.43    4.66 
 -12   3  -2   12.06    4.38 
  12   3   2   12.88    3.56 
  12  -3   2   14.25    3.29 
  12   3   2   14.80    4.93 
 -12  -3  -2   16.44    3.84 
  12  -3   2   14.80    3.56 
 -12   3  -2   13.98    3.29 
 -12  -3  -2   15.07    3.84 
  12  -3   2   13.43    3.84 
 -12   3  -2   13.15    4.11 
 -12  -3  -2   16.44    4.66 
 -11   3  -2  179.23    7.95 
  11  -3   2  191.56    8.22 
 -11  -3  -2  185.81    8.50 
 -11   3  -2  187.45    8.77 
  11   3   2  199.78    8.50 
  11  -3   2  189.37    8.77 
  11   3   2  189.92    8.50 
 -11  -3  -2  176.49    8.22 
  11  -3   2  186.63    8.50 
 -11   3  -2  178.95    8.50 
 -11  -3  -2  183.07    8.50 
  11  -3   2  197.04    8.77 
 -11   3  -2  174.30    8.50 
 -11  -3  -2  172.93    9.04 
 -10   3  -2  110.17    6.30 
  10  -3   2  109.07    5.76 
 -10  -3  -2  101.95    6.03 
 -10   3  -2  110.17    5.76 
  10   3   2  121.40    5.76 
  10  -3   2  115.38    6.30 
  10   3   2  123.05    6.03 
 -10  -3  -2  114.28    6.03 
  10  -3   2  113.73    5.76 
 -10   3  -2  120.86    6.30 
 -10  -3  -2  115.38    6.85 
  10  -3   2  106.88    5.76 
 -10   3  -2   97.29    6.85 
 -10  -3  -2  110.17    6.03 
  -9   3  -2  395.45   10.41 
   9  -3   2  413.27   10.69 
  -9  -3  -2  397.65   10.69 
   9   3   2  391.07   10.41 
  -9   3  -2  384.49   10.41 
   9   3   2  405.05   11.24 
  -9  -3  -2  386.14   10.69 
   9  -3   2  383.40   10.69 
  -9   3  -2  400.39   10.41 
   9  -3   2  384.49   10.96 
  -9   3  -2  394.91   10.96 
  -9  -3  -2  390.80   10.69 
   9   3   2  376.00   10.41 
  -8   3  -2  331.87   10.14 
   8  -3   2  340.64    9.87 
  -8   3  -2  327.49   10.14 
  -8  -3  -2  305.02    9.32 
   8   3   2  317.35    9.87 
  -8   3  -2  311.87    9.59 
   8   3   2  330.50    9.87 
  -8  -3  -2  340.64   10.96 
   8  -3   2  305.57    9.87 
  -8   3  -2  331.05    9.87 
   8  -3   2  317.08   10.14 
  -8   3  -2  341.47   10.41 
  -8  -3  -2  321.46    9.87 
   8   3   2  327.22    9.87 
  -7  -3  -2  282.55    8.77 
  -7   3  -2  261.44    8.50 
   7  -3   2  265.01    8.50 
  -7  -3  -2  253.22    8.22 
  -7   3  -2  254.32    8.77 
  -7  -3  -2  234.31    7.67 
   7   3   2  261.17    8.50 
  -7   3  -2  225.00    9.32 
   7   3   2  255.69    8.50 
  -7  -3  -2  251.03    8.77 
   7  -3   2  254.04    8.50 
  -7   3  -2  266.38    9.04 
   7  -3   2  261.99    9.04 
  -7   3  -2  246.65    8.77 
  -7  -3  -2  202.80    9.04 
   7   3   2  257.88    9.32 
  -6  -3  -2   10.96    3.01 
  -6   3  -2   11.51    3.56 
   6  -3   2   10.41    2.74 
  -6  -3  -2   10.96    3.01 
  -6   3  -2   10.96    2.47 
  -6  -3  -2   10.96    2.74 
   6   3   2    9.04    2.74 
  -6   3  -2    9.87    3.29 
   6   3   2   11.24    2.74 
  -6  -3  -2   12.06    3.01 
   6  -3   2   12.88    3.29 
  -6   3  -2   11.78    3.01 
   6  -3   2   12.61    3.01 
  -6   3  -2   13.15    3.29 
  -6  -3  -2    9.59    3.29 
   6   3   2   12.33    3.84 
  -5  -3  -2   13.70    2.47 
  -5   3  -2   13.98    2.74 
   5  -3   2   11.51    3.29 
  -5  -3  -2   13.70    2.47 
  -5   3  -2   13.43    2.74 
  -5  -3  -2   12.33    2.74 
   5   3   2   13.43    2.74 
  -5   3  -2   13.98    2.74 
   5   3   2   15.07    3.01 
  -5  -3  -2   13.70    3.01 
   5  -3   2   12.33    2.74 
  -5   3  -2   12.33    2.74 
   5  -3   2   15.89    4.11 
  -5   3  -2   14.52    3.84 
  -5  -3  -2   13.98    3.01 
   5   3   2   14.25    4.11 
  -4  -3  -2  119.49    5.21 
  -4   3  -2  113.18    5.48 
   4  -3   2  122.50    5.48 
  -4  -3  -2  112.63    5.21 
   4  -3   2  109.62    5.48 
  -4   3  -2  113.73    5.76 
  -4  -3  -2  103.87    5.48 
   4   3   2  124.14    5.48 
   4   3   2  126.89    6.30 
  -4  -3  -2  116.47    6.03 
   4  -3   2  127.16    5.76 
  -4   3  -2  109.35    5.76 
   4  -3   2  128.53    6.03 
  -4   3  -2  131.27    6.30 
  -4  -3  -2  120.03    6.30 
   4   3   2  124.14    5.76 
  -3  -3  -2    0.00    1.64 
  -3   3  -2    0.82    2.74 
   3  -3   2    0.27    1.92 
  -3  -3  -2    0.00    1.64 
   3  -3   2    0.27    1.92 
  -3   3  -2    0.00    2.47 
  -3  -3  -2    0.00    1.92 
   3   3   2    0.00    1.92 
  -3  -3  -2   -0.27    3.01 
   3  -3   2    0.00    1.92 
  -3   3  -2    0.00    2.47 
  -3  -3  -2   -0.27    2.19 
   3  -3   2   -0.82    2.19 
  -3   3  -2    0.55    2.47 
  -3  -3  -2   -1.64    3.01 
   3   3   2   -0.82    3.29 
  -2  -3  -2   27.13    2.74 
  -2   3  -2   25.21    3.01 
   2  -3   2   26.03    3.56 
   2  -3   2   25.49    3.56 
  -2   3  -2   28.78    3.56 
  -2  -3  -2   24.39    2.74 
   2   3   2   25.49    3.01 
  -2  -3  -2   25.76    3.84 
   2  -3   2   29.60    3.29 
   2  -3   2   23.84    3.29 
  -2  -3  -2   22.75    3.56 
   2  -3   2   27.41    4.11 
  -2   3  -2   25.21    3.29 
  -2  -3  -2   23.84    3.56 
   2   3   2   27.68    3.84 
   1   3   2  171.01    6.30 
  -1  -3  -2  174.30    6.58 
  -1   3  -2  169.64    6.30 
   1  -3   2  180.05    6.30 
   1  -3   2  173.75    6.58 
  -1   3  -2  191.29    7.40 
  -1  -3  -2  169.64    6.30 
   1   3   2  180.33    6.58 
   1  -3   2  180.87    6.58 
  -1  -3  -2  170.19    6.85 
   1  -3   2  177.86    7.13 
   1   3   2  184.71    6.85 
   1  -3   2  174.57    6.85 
  -1   3  -2  181.42    7.40 
  -1  -3  -2  182.79    6.85 
   1   3   2  179.23    6.85 
   0   3   2   74.54    4.66 
   0  -3  -2   77.28    4.38 
   0   3  -2   76.73    4.38 
   0  -3   2   79.47    4.66 
   0  -3   2   76.19    4.66 
   0   3  -2   76.19    4.66 
   0  -3  -2   76.73    4.38 
   0   3   2   78.93    4.38 
   0   3  -2   80.30    4.93 
   0  -3   2   75.91    4.66 
   0  -3  -2   75.09    4.93 
   0   3   2   77.01    4.93 
   0  -3   2   74.27    4.66 
   0   3  -2   78.93    5.21 
   0  -3  -2   78.65    4.66 
   0   3   2   75.91    4.66 
  -1   3   2    1.10    2.47 
   1  -3  -2    0.55    2.74 
   1   3  -2    1.64    2.47 
  -1  -3   2    1.92    1.92 
  -1  -3   2    1.10    2.19 
   1   3  -2    1.64    2.19 
   1  -3  -2    1.92    1.92 
  -1   3   2    1.92    1.64 
   1   3  -2    2.47    2.47 
  -1  -3   2    1.92    2.19 
   1  -3  -2    0.82    2.74 
  -1   3   2    1.92    2.47 
  -1  -3   2    2.74    2.19 
   1   3  -2    1.37    2.47 
   1  -3  -2    1.37    2.74 
  -1   3   2    1.64    1.92 
  -2   3   2  314.61   12.06 
   2  -3  -2  328.86   12.33 
   2   3  -2  309.68   12.06 
  -2  -3   2  330.50   12.61 
  -2  -3   2  325.30   12.61 
   2   3  -2  339.55   13.15 
   2  -3  -2  317.62   12.33 
  -2   3   2  339.27   12.88 
   2   3  -2  334.89   13.15 
  -2  -3   2  341.19   13.15 
   2  -3  -2  322.01   12.61 
  -2   3   2  336.53   12.88 
   2  -3  -2  328.31   13.15 
  -2  -3   2  329.68   12.88 
  -2   3   2  332.15   12.88 
   2   3  -2  334.89   13.15 
  -3   3   2  382.03   13.98 
   3  -3  -2  406.69   14.52 
   3   3  -2  384.77   13.98 
  -3  -3   2  392.17   13.98 
   3   3  -2  385.04   14.52 
   3   3  -2  399.02   14.80 
  -3  -3   2  346.95   13.70 
   3  -3  -2  405.05   14.80 
  -3   3   2  391.89   14.80 
   3  -3  -2  391.62   14.80 
  -3  -3   2  335.71   13.43 
  -3   3   2  361.47   13.98 
   3   3  -2  404.22   14.80 
  -4   3   2  175.39    6.30 
   4  -3  -2  171.01    6.58 
   4   3  -2  173.47    6.30 
  -4  -3   2  155.39    6.30 
  -4  -3   2  172.38    6.85 
   4   3  -2  184.98    7.40 
   4   3  -2  179.50    6.85 
  -4  -3   2  185.81    6.85 
   4  -3  -2  174.30    7.13 
  -4   3   2  188.00    7.13 
   4  -3  -2  179.78    7.13 
  -4   3   2  177.58    7.40 
  -4  -3   2  180.05    6.85 
   4   3  -2  183.07    7.40 
  -5   3   2 1154.30   18.09 
   5   3  -2 1141.15   17.81 
  -5  -3   2 1130.46   18.09 
  -5  -3   2 1113.19   18.91 
   5   3  -2 1185.82   18.64 
  -5  -3   2 1170.19   19.18 
   5  -3  -2 1155.12   18.91 
  -5   3   2 1152.66   19.18 
   5  -3  -2 1144.71   19.73 
  -5  -3   2 1173.48   18.91 
   5   3  -2 1182.80   19.73 
  -6   3   2    4.93    2.47 
   6  -3  -2    4.11    2.47 
   6   3  -2    4.38    2.47 
  -6  -3   2    3.56    2.47 
  -6  -3   2    3.29    2.74 
   6   3  -2    2.74    2.47 
   6  -3  -2    4.11    2.74 
   6   3  -2    1.92    3.01 
  -6  -3   2    2.74    3.01 
   6  -3  -2    3.56    3.56 
  -6   3   2    3.84    3.01 
   6  -3  -2    4.38    2.74 
  -6   3   2    4.11    2.47 
  -6  -3   2    5.21    3.29 
   6   3  -2    3.29    2.47 
  -7   3   2  281.45    9.04 
   7  -3  -2  299.81    9.04 
   7   3  -2  296.25    9.04 
  -7  -3   2  305.84    9.32 
  -7   3   2  294.60    9.04 
  -7  -3   2  288.85    9.32 
   7   3  -2  312.97    9.59 
   7  -3  -2  297.34    9.04 
   7   3  -2  310.22   10.14 
  -7  -3   2  300.91    9.32 
   7  -3  -2  292.41    9.59 
  -7   3   2  294.06    9.32 
   7  -3  -2  296.52    9.59 
  -7   3   2  303.37    9.87 
  -7  -3   2  263.64    9.04 
   7   3  -2  273.78    9.59 
  -8   3   2   37.27    4.38 
   8  -3  -2   40.56    3.84 
   8   3  -2   40.56    3.56 
  -8  -3   2   37.54    3.56 
  -8  -3   2   39.46    4.11 
  -8   3   2   35.35    3.56 
   8   3  -2   44.40    4.38 
   8  -3  -2   38.37    3.56 
   8   3  -2   40.01    4.11 
  -8  -3   2   39.74    4.11 
   8  -3  -2   40.56    4.93 
  -8   3   2   43.03    4.11 
   8  -3  -2   44.12    4.66 
  -8   3   2   39.46    3.84 
  -8  -3   2   39.46    4.66 
   8   3  -2   39.46    4.38 
  -9   3   2   92.63    5.21 
   9  -3  -2   89.34    4.93 
   9   3  -2   89.61    4.66 
  -9  -3   2   91.53    4.93 
  -9  -3   2   87.42    6.03 
  -9   3   2   90.44    4.93 
   9   3  -2   93.73    6.30 
   9  -3  -2   89.07    4.93 
   9   3  -2   94.27    6.30 
  -9  -3   2   85.50    5.21 
   9  -3  -2   94.82    5.48 
  -9   3   2   82.49    5.21 
   9  -3  -2   88.79    5.76 
  -9   3   2   92.63    6.03 
  -9  -3   2   86.87    5.48 
   9   3  -2   97.56    6.30 
  10   3  -2   85.23    4.66 
 -10   3   2   77.28    5.48 
  10  -3  -2   85.23    4.93 
  10   3  -2   81.12    4.66 
 -10  -3   2   82.22    5.21 
 -10   3   2   79.20    4.93 
  10   3  -2   85.50    5.21 
  10  -3  -2   82.22    4.66 
  10   3  -2   78.38    5.76 
 -10  -3   2   81.67    6.30 
  10  -3  -2   79.47    5.21 
 -10   3   2   80.30    5.21 
  10  -3  -2   78.65    5.48 
 -10   3   2   79.75    5.21 
 -10  -3   2   80.30    5.21 
  10   3  -2   77.01    4.93 
 -11   3   2   15.89    3.29 
  11   3  -2   17.54    3.01 
  11  -3  -2   15.62    3.29 
  11   3  -2   17.27    3.01 
 -11  -3   2   16.17    3.84 
 -11   3   2   13.70    3.01 
  11   3  -2   13.98    4.38 
  11  -3  -2   15.89    2.74 
  11   3  -2   16.44    4.11 
 -11  -3   2   17.54    4.38 
  11  -3  -2   18.64    4.93 
 -11   3   2   12.61    4.11 
  11  -3  -2   14.52    3.29 
 -11   3   2   13.43    3.56 
 -11  -3   2   14.25    4.11 
  11   3  -2   16.72    3.56 
 -12   3   2   26.31    3.84 
  12   3  -2   27.95    3.56 
  12  -3  -2   32.06    3.84 
  12   3  -2   27.13    3.29 
 -12  -3   2   21.38    4.11 
 -12   3   2   24.66    3.56 
  12   3  -2   28.23    4.38 
  12  -3  -2   25.21    4.11 
  12   3  -2   24.94    4.38 
 -12  -3   2   24.94    4.38 
  12  -3  -2   25.49    4.11 
 -12   3   2   26.03    4.11 
 -12  -3   2   23.29    3.84 
  12  -3  -2   25.21    3.84 
 -12   3   2   26.03    5.21 
 -12  -3   2   23.57    3.84 
 -13   3   2    7.95    4.11 
  13   3  -2   10.41    3.29 
  13  -3  -2    5.21    3.29 
  13   3  -2    8.22    2.74 
 -13  -3   2    6.30    3.84 
 -13   3   2    6.58    3.01 
  13   3  -2    7.95    3.56 
  13  -3  -2    7.67    3.01 
  13   3  -2    4.38    4.66 
 -13  -3   2    9.32    4.11 
  13  -3  -2    9.32    3.84 
 -13   3   2    6.03    3.56 
 -13  -3   2    7.40    3.56 
  13  -3  -2    7.95    3.29 
 -13   3   2    6.30    3.56 
 -13  -3   2    6.85    4.11 
 -14   3   2   16.17    3.84 
  14   3  -2   18.36    3.84 
  14  -3  -2   18.64    3.84 
  14   3  -2   20.28    3.56 
 -14  -3   2   14.25    4.38 
 -14   3   2   17.27    3.84 
  14   3  -2   18.64    4.11 
  14  -3  -2   15.89    4.38 
  14   3  -2   22.20    6.03 
 -14  -3   2   11.51    4.11 
  14  -3  -2   11.24    4.11 
 -14   3   2   19.46    4.11 
 -14  -3   2   17.54    4.11 
  14  -3  -2   16.99    5.21 
 -14   3   2   16.99    5.21 
 -14  -3   2   16.17    4.11 
 -15   3   2   65.77    5.48 
  15  -3  -2   80.02    6.03 
  15   3  -2   80.30    6.03 
  15   3  -2   75.09    5.48 
 -15  -3   2   63.85    6.03 
 -15   3   2   66.87    6.85 
  15   3  -2   70.16    6.58 
  15  -3  -2   72.62    5.76 
  15   3  -2   77.28    6.30 
  15  -3  -2   75.91    6.30 
 -15  -3   2   67.69    6.03 
 -15   3   2   67.14    5.76 
  15  -3  -2   67.96    5.76 
 -15  -3   2   66.59    7.13 
 -15   3   2   66.87    7.40 
 -15  -3   2   65.22    5.76 
 -16   3   2    0.82    3.84 
  16  -3  -2    1.10    3.84 
  16   3  -2    1.10    3.84 
  16   3  -2    0.82    3.56 
 -16  -3   2    1.64    4.38 
 -16   3   2    2.74    4.11 
  16   3  -2   -1.37    5.21 
  16  -3  -2    0.55    3.84 
  16   3  -2    0.27    4.11 
  16  -3  -2    0.27    4.11 
 -16  -3   2    0.00    4.38 
 -16   3   2    0.82    4.11 
  16  -3  -2   -0.27    3.84 
 -16  -3   2    1.37    4.38 
 -16   3   2    0.55    5.21 
 -16  -3   2    1.64    4.11 
  17  -3  -2   37.82    4.93 
  17   3  -2   38.37    5.21 
  17   3  -2    0.82    3.84 
 -17  -3   2   26.58    5.21 
 -17   3   2   29.05    6.30 
  17   3  -2   33.43    5.48 
  17  -3  -2   36.17    6.03 
  17   3  -2   35.08    6.58 
  17  -3  -2   30.42    5.48 
 -17  -3   2   29.87    5.21 
 -17   3   2   27.41    4.93 
  17  -3  -2   27.68    5.21 
 -17  -3   2   33.43    6.85 
 -17   3   2   26.86    6.85 
 -17  -3   2   30.42    4.93 
  18  -3  -2    2.47    5.48 
  18  -3  -2    3.01    4.93 
 -18  -3   2    2.19    6.85 
 -18   3   2    3.29    4.66 
  18   3  -2    2.74    4.38 
  18  -3  -2    4.38    4.11 
  18   3  -2    4.93    4.93 
  18  -3  -2    3.84    5.76 
 -18  -3   2    2.47    4.66 
 -18   3   2    3.56    4.66 
  18  -3  -2    3.84    4.66 
 -18  -3   2    5.21    4.93 
 -18   3   2    4.11    6.30 
 -18  -3   2    4.38    4.66 
  19  -3  -2    4.66    6.03 
  19  -3  -2    4.11    4.93 
 -19  -3   2    3.84    5.21 
 -19   3   2    0.82    6.85 
  19   3  -2    6.85    4.93 
  19  -3  -2    3.01    4.38 
  19   3  -2    3.84    4.93 
  19  -3  -2    3.84    4.93 
 -19  -3   2    3.29    4.93 
 -19   3   2    0.00    4.66 
 -19  -3   2    3.29    5.48 
 -19   3   2    1.37    5.21 
 -19  -3   2    2.74    4.93 
 -19   3   2   -0.55    4.93 
  20  -3  -2   11.51    5.21 
  20  -3  -2    8.77    5.76 
 -20   3   2    8.50    6.30 
 -20  -3   2    7.13    6.03 
  20   3  -2    9.04    5.21 
  20  -3  -2   12.61    6.30 
  20   3  -2    5.48    5.48 
  20  -3  -2    4.66    5.21 
 -20  -3   2    5.76    5.21 
 -20   3   2    6.30    6.58 
 -20  -3   2    7.95    6.58 
 -20   3   2    7.95    5.76 
 -20  -3   2    5.48    7.40 
 -20   3   2    9.32    6.85 
  21  -3  -2   13.15    5.48 
  21  -3  -2    8.77    5.48 
 -21   3   2   11.24    6.58 
 -21  -3   2    8.77    6.03 
  21   3  -2   10.41    5.48 
  21  -3  -2   11.24    7.40 
  21   3  -2   12.06    6.03 
  21  -3  -2    9.87    5.48 
 -21  -3   2   12.61    6.30 
 -21   3   2    9.32    5.48 
 -21  -3   2    7.40    6.30 
 -21   3   2    7.95    8.22 
 -21  -3   2   10.41    5.76 
 -21   3   2   10.69    5.76 
 -21   4  -2   15.89    5.48 
  21  -4   2   20.55    5.48 
 -21   4  -2   16.99    6.30 
 -21  -4  -2   15.89    5.76 
 -21   4  -2   19.73    6.30 
  21   4   2   14.52    5.48 
  21   4   2   23.57    6.03 
  21  -4   2   22.47    7.40 
 -21  -4  -2   16.99    6.03 
 -21   4  -2   20.83    6.58 
  21  -4   2   13.43    7.40 
 -21  -4  -2   15.62    8.22 
 -21   4  -2   17.81    6.30 
 -21  -4  -2   20.28    6.03 
 -20   4  -2   28.23    5.76 
  20  -4   2   29.05    6.85 
 -20   4  -2   23.29    5.76 
 -20  -4  -2   25.49    5.48 
 -20   4  -2   23.84    7.95 
  20   4   2   26.58    5.48 
  20   4   2   29.60    5.76 
  20  -4   2   23.57    6.58 
 -20  -4  -2   26.58    6.03 
 -20   4  -2   23.57    7.67 
  20  -4   2   24.94    5.76 
 -20  -4  -2   22.20    7.67 
 -20   4  -2   31.24    6.30 
 -20  -4  -2   23.29    5.76 
 -19   4  -2   -1.64    6.03 
  19  -4   2   -0.82    5.76 
 -19  -4  -2    3.01    6.85 
 -19   4  -2    0.00    5.21 
  19   4   2    1.92    6.03 
  19   4   2   -0.55    6.30 
  19  -4   2    0.82    5.21 
 -19  -4  -2   -1.10    6.03 
 -19   4  -2    3.01    6.03 
  19  -4   2    3.01    5.21 
 -19  -4  -2   -1.10    5.21 
 -19   4  -2    0.55    5.48 
 -19  -4  -2   -0.55    6.58 
 -18   4  -2    1.10    4.38 
  18  -4   2    2.19    4.38 
 -18  -4  -2    4.93    4.66 
 -18   4  -2    2.47    4.93 
  18   4   2    2.19    4.66 
  18   4   2    1.10    5.21 
  18  -4   2    3.56    5.76 
 -18  -4  -2    3.01    5.21 
 -18   4  -2    2.74    4.66 
  18  -4   2    2.47    4.66 
 -18  -4  -2    0.00    4.93 
 -18   4  -2    3.56    7.13 
 -18  -4  -2    1.10    4.93 
 -17   4  -2   16.17    4.38 
  17  -4   2   16.17    4.38 
 -17  -4  -2   14.52    4.66 
 -17   4  -2   14.52    4.66 
  17   4   2   15.07    4.66 
  17   4   2   15.89    5.48 
  17  -4   2   16.99    4.66 
 -17  -4  -2   16.44    5.21 
 -17   4  -2   15.62    4.66 
  17  -4   2   16.72    6.58 
 -17  -4  -2   18.91    5.21 
 -17   4  -2   12.33    6.30 
 -17  -4  -2   12.61    4.93 
 -16   4  -2    1.37    5.76 
  16  -4   2    0.82    4.93 
 -16   4  -2    0.55    4.11 
 -16  -4  -2    3.84    4.38 
 -16   4  -2    1.64    4.93 
  16   4   2   -0.55    5.21 
  16   4   2    3.01    4.93 
 -16  -4  -2   -2.74    6.30 
  16  -4   2    1.37    4.11 
 -16   4  -2    3.29    5.76 
 -16  -4  -2    1.64    4.66 
  16  -4   2    2.47    4.38 
 -16   4  -2   -1.10    4.66 
 -16  -4  -2    0.00    4.38 
 -15   4  -2   85.78    6.30 
  15  -4   2   95.92    6.58 
 -15   4  -2   80.02    6.30 
 -15  -4  -2   86.87    6.58 
 -15   4  -2   81.39    6.30 
  15   4   2   96.74    6.85 
  15   4   2   87.70    7.67 
 -15  -4  -2   89.61    6.85 
  15  -4   2   95.10    6.85 
 -15   4  -2   81.39    6.85 
 -15  -4  -2   91.26    8.22 
  15  -4   2   93.73    7.13 
 -15   4  -2   85.78    6.85 
 -15  -4  -2   92.08    7.13 
 -14   4  -2  104.41    6.85 
  14  -4   2  105.24    7.40 
 -14   4  -2   98.93    7.67 
 -14  -4  -2  100.03    7.40 
 -14   4  -2  108.25    6.85 
  14   4   2  115.65    7.13 
  14   4   2  113.73    7.40 
 -14  -4  -2   88.79    7.67 
  14  -4   2  106.06    7.67 
 -14   4  -2  106.06    6.85 
 -14  -4  -2  107.70    7.40 
  14  -4   2  107.15    7.67 
 -14   4  -2  102.22    7.95 
 -14  -4  -2  101.40    7.13 
 -13   4  -2   34.53    4.38 
  13  -4   2   37.00    4.11 
 -13   4  -2   31.24    4.11 
 -13  -4  -2   29.05    4.38 
 -13   4  -2   32.61    4.38 
  13   4   2   38.09    4.66 
  13   4   2   38.37    4.66 
 -13  -4  -2   31.24    4.66 
  13  -4   2   37.54    5.48 
 -13   4  -2   35.35    4.66 
 -13  -4  -2   33.71    4.66 
  13  -4   2   38.09    4.93 
 -13   4  -2   44.94    6.30 
 -13  -4  -2   36.72    4.66 
 -12   4  -2    2.47    4.66 
  12  -4   2   -0.27    3.84 
 -12   4  -2    0.00    3.01 
 -12  -4  -2    1.64    4.66 
 -12   4  -2    1.92    3.01 
  12   4   2    0.00    3.29 
  12   4   2   -0.55    4.38 
 -12  -4  -2    0.27    3.56 
  12  -4   2   -1.64    4.11 
 -12   4  -2   -0.27    4.38 
 -12  -4  -2    1.64    5.21 
  12  -4   2    0.00    3.56 
 -12   4  -2    2.47    3.84 
 -12  -4  -2    0.82    3.56 
 -11   4  -2  138.94    7.40 
  11  -4   2  151.00    7.40 
 -11   4  -2  147.99    7.40 
 -11  -4  -2  159.22    7.95 
  11   4   2  154.02    7.67 
 -11   4  -2  155.39    7.40 
  11   4   2  149.36    7.40 
 -11  -4  -2  148.54    7.67 
  11  -4   2  143.88    7.40 
 -11   4  -2  148.26    7.95 
  11  -4   2  149.08    8.50 
 -11   4  -2  150.18    7.67 
 -11  -4  -2  145.25    7.67 
  11   4   2  143.05    7.40 
 -10   4  -2   41.93    4.11 
  10  -4   2   47.14    4.11 
 -10   4  -2   48.23    4.38 
 -10  -4  -2   46.31    4.66 
  10   4   2   46.59    4.38 
 -10   4  -2   44.67    4.38 
  10   4   2   46.86    4.38 
 -10  -4  -2   43.85    5.48 
  10  -4   2   48.23    4.38 
 -10   4  -2   47.68    4.66 
  10  -4   2   47.68    4.66 
 -10   4  -2   50.15    4.93 
 -10  -4  -2   44.94    4.66 
  10   4   2   47.41    5.48 
  -9   4  -2  117.02    5.76 
   9  -4   2  117.02    5.48 
  -9   4  -2  115.38    5.76 
  -9  -4  -2  121.40    6.58 
   9   4   2  121.68    6.03 
  -9   4  -2  107.70    5.76 
   9   4   2  114.83    5.76 
  -9  -4  -2  116.20    6.03 
   9  -4   2  118.12    5.76 
  -9   4  -2  111.26    6.30 
   9  -4   2  110.99    6.03 
  -9   4  -2  113.18    6.85 
  -9  -4  -2  110.72    6.30 
   9   4   2  109.89    5.76 
  -8   4  -2   20.55    4.11 
   8  -4   2   24.39    3.29 
  -8   4  -2   24.12    3.84 
  -8  -4  -2   26.58    3.84 
   8   4   2   24.39    3.56 
  -8   4  -2   23.02    3.29 
   8   4   2   23.29    3.56 
  -8  -4  -2   24.12    3.84 
   8  -4   2   22.75    3.84 
  -8   4  -2   24.94    4.11 
   8  -4   2   25.49    3.84 
  -8   4  -2   24.12    5.21 
  -8  -4  -2   24.66    3.84 
   8   4   2   27.13    4.11 
  -7   4  -2    3.01    3.29 
  -7  -4  -2    4.11    3.29 
   7  -4   2    4.38    2.74 
  -7  -4  -2    4.11    3.29 
  -7   4  -2    2.47    2.47 
  -7  -4  -2    4.93    2.74 
   7   4   2    3.56    2.74 
  -7   4  -2    2.74    2.74 
   7   4   2    2.74    2.74 
  -7  -4  -2    3.29    3.29 
   7  -4   2    3.84    2.47 
  -7   4  -2    3.01    2.47 
   7  -4   2    3.84    3.01 
  -7   4  -2    3.29    3.84 
  -7  -4  -2    3.56    3.01 
   7   4   2    3.29    3.01 
  -6  -4  -2  888.47   17.81 
  -6   4  -2  867.37   17.54 
   6  -4   2  889.57   18.09 
  -6  -4  -2  859.42   17.81 
  -6   4  -2  898.89   18.64 
  -6  -4  -2  865.72   18.91 
  -6   4  -2  855.31   17.81 
   6   4   2  873.12   18.09 
  -6  -4  -2  886.00   18.64 
   6  -4   2  866.27   18.09 
  -6   4  -2  893.40   18.64 
   6  -4   2  908.48   19.46 
  -6   4  -2  883.81   18.64 
  -6  -4  -2  870.66   18.09 
   6   4   2  869.84   18.09 
  -5  -4  -2  348.04    9.59 
  -5   4  -2  353.52   10.14 
   5  -4   2  359.28   10.14 
  -5  -4  -2  335.16    9.59 
  -5   4  -2  356.81   10.41 
  -5  -4  -2  353.80   10.69 
   5   4   2  358.18   10.14 
   5   4   2  351.88   10.41 
  -5  -4  -2  326.94   10.69 
   5  -4   2  350.78   10.41 
  -5   4  -2  370.52   10.69 
   5  -4   2  342.56   10.41 
  -5   4  -2  348.32   10.96 
  -5  -4  -2  362.02   11.24 
   5   4   2  355.44   10.41 
  -4  -4  -2  799.40   16.44 
  -4   4  -2  789.81   16.99 
   4  -4   2  796.39   16.72 
  -4  -4  -2  795.29   16.99 
   4  -4   2  824.07   17.54 
  -4  -4  -2  790.09   17.54 
   4   4   2  839.69   17.27 
  -4  -4  -2  792.55   18.09 
   4  -4   2  821.60   17.81 
  -4   4  -2  848.19   18.09 
  -4  -4  -2  782.96   17.81 
   4  -4   2  801.05   18.09 
  -4   4  -2  808.45   17.81 
  -4  -4  -2  793.92   17.27 
   4   4   2  822.15   17.54 
   3   4   2  116.20    5.48 
  -3  -4  -2  112.09    5.21 
  -3   4  -2   94.82    5.48 
   3  -4   2  115.38    5.48 
   3  -4   2  115.10    5.48 
  -3   4  -2  118.94    5.76 
  -3  -4  -2  117.02    5.48 
   3   4   2  115.10    5.48 
  -3  -4  -2  109.62    5.48 
   3  -4   2  118.39    5.48 
  -3  -4  -2  120.58    6.58 
   3  -4   2  114.28    6.03 
  -3   4  -2  122.77    6.30 
  -3  -4  -2  106.61    5.76 
   3   4   2  115.38    6.30 
   2   4   2  124.14    5.76 
  -2  -4  -2  128.53    5.48 
  -2   4  -2  122.50    5.48 
   2  -4   2  129.08    5.48 
   2  -4   2  124.97    5.76 
  -2   4  -2  131.82    6.03 
  -2  -4  -2  135.38    6.30 
   2   4   2  129.35    5.48 
   2  -4   2  117.29    5.76 
  -2  -4  -2  127.16    6.03 
   2  -4   2  123.87    6.30 
  -2  -4  -2  125.52    6.30 
   2  -4   2  122.50    6.03 
  -2   4  -2  129.35    6.03 
  -2  -4  -2  127.71    6.03 
   2   4   2  118.94    6.03 
   1   4   2  291.86   11.24 
  -1  -4  -2  297.62   11.51 
  -1   4  -2  290.49   11.24 
   1  -4   2  302.28   11.78 
   1  -4   2  278.44   11.51 
  -1   4  -2  298.17   12.06 
  -1  -4  -2  302.83   12.06 
   1   4   2  279.81   11.24 
   1  -4   2  297.07   12.06 
  -1  -4  -2  272.13   11.51 
   1  -4   2  288.30   11.78 
   1  -4   2  289.95   11.78 
  -1   4  -2  296.25   12.06 
  -1  -4  -2  289.12   12.06 
   1   4   2  307.76   12.33 
   0   4   2   43.85    3.56 
   0  -4  -2   40.83    3.56 
   0   4  -2   41.93    3.84
[truncated: 1,644,528 more chars]
